# Supplementary material for: Enhancing Social Interaction in Depression (SIDE study): protocol of a randomised controlled trial on the effects of a Cognitively Based Compassion Training (CBCT) for couples
Source: PubMed Central journal article supplement — BMJ Open. 2018 Oct 4;8(9):e020448. doi: 10.1136/bmjopen-2017-020448 (PMC6173246; doi:10.1136/bmjopen-2017-020448), 2018-10-04
Supplement: bmjopen-2017-020448.draft_revisions.pdf [file bmjopen-2017-020448.draft_revisions.pdf]

# BMJ Open

BMJ Open is committed to open peer review. As part of this commitment we make the peer review history of every article we publish publicly available.

When an article is published we post the peer reviewers' comments and the authors' responses online. We also post the versions of the paper that were used during peer review. These are the versions that the peer review comments apply to.

The versions of the paper that follow are the versions that were submitted during the peer review process. They are not the versions of record or the final published versions. They should not be cited or distributed as the published version of this manuscript.

BMJ Open is an open access journal and the full, final, typeset and author-corrected version of record of the manuscript is available on our site with no access controls, subscription charges or pay-per-view fees (<http://bmjopen.bmj.com>).

If you have any questions on BMJ Open's open peer review process please email [info.bmjopen@bmj.com](mailto:info.bmjopen@bmj.com)

# BMJ Open

## Enhancing Social Interaction in Depression (SIDE Study) – Protocol of a randomized controlled trial on the effects of a Cognitively-Based-Compassion-Training (CBCT®) for Couples

|                               |                                                                                                                                                                                                                                                                                                                                                                                                                                                                                                                                                                                                                                                                                                                                          |
|-------------------------------|------------------------------------------------------------------------------------------------------------------------------------------------------------------------------------------------------------------------------------------------------------------------------------------------------------------------------------------------------------------------------------------------------------------------------------------------------------------------------------------------------------------------------------------------------------------------------------------------------------------------------------------------------------------------------------------------------------------------------------------|
| Journal:                      | <i>BMJ Open</i>                                                                                                                                                                                                                                                                                                                                                                                                                                                                                                                                                                                                                                                                                                                          |
| Manuscript ID                 | bmjopen-2017-020448                                                                                                                                                                                                                                                                                                                                                                                                                                                                                                                                                                                                                                                                                                                      |
| Article Type:                 | Protocol                                                                                                                                                                                                                                                                                                                                                                                                                                                                                                                                                                                                                                                                                                                                 |
| Date Submitted by the Author: | 07-Nov-2017                                                                                                                                                                                                                                                                                                                                                                                                                                                                                                                                                                                                                                                                                                                              |
| Complete List of Authors:     | Aguilar-Raab, Corina; UniversitätsKlinikum Heidelberg, Institute of Medical Psychology<br>Jarczok, Marc; University Hospital Ulm, Clinic of Psychosomatic Medicine and Psychotherapy<br>Warth, Marco; UniversitätsKlinikum Heidelberg, Institute of Medical Psychology<br>Tieck, Maria; UniversitätsKlinikum Heidelberg, Institute of Medical Psychology<br>Berg, Judith; UniversitätsKlinikum Heidelberg, Institute of Medical Psychology<br>Negi, Lobsang; Emory College, Emory University, Department of Religion<br>Harrison, Tim; CBCT® Teacher Training, Emory University, Emory-Tibet Partnership<br>Pace, Thaddeus; The University of Arizona<br>Ditzen, Beate; UniversitätsKlinikum Heidelberg, Institute of Medical Psychology |
| Keywords:                     | Depression & mood disorders < PSYCHIATRY, study protocol, mindfulness- and compassion based intervention, psychobiological indicators of health                                                                                                                                                                                                                                                                                                                                                                                                                                                                                                                                                                                          |
|                               |                                                                                                                                                                                                                                                                                                                                                                                                                                                                                                                                                                                                                                                                                                                                          |

SCHOLARONE™  
Manuscripts

1  
2  
3 Enhancing Social Interaction in Depression (SIDE Study) – Protocol of a  
4 randomized controlled trial on the effects of a Cognitively-Based-Compassion-  
5 Training (CBCT®) for Couples  
6  
7  
8  
9

10  
11 Corina Aguilar-Raab<sup>1\*</sup>, Marc N. Jarczok<sup>2\*</sup>, Marco Warth<sup>1</sup>, Maria Tieck<sup>1</sup>, Judith Berg<sup>1</sup>, Lobsang  
12 Tenzin Negi<sup>3</sup>, Tim Harrison<sup>4</sup>, Thaddeus W.W. Pace<sup>5</sup>, & Beate Ditzen<sup>1</sup>  
13  
14

15  
16 <sup>1</sup>Institute of Medical Psychology, Center for Psychosocial Medicine, University Hospital,  
17 Heidelberg University  
18

19 <sup>2</sup>Clinic for Psychosomatic Medicine and Psychotherapy, University Hospital, Ulm University  
20

21 <sup>3</sup>Emory-Tibet Partnership, Department of Religion, Emory College, Emory University, Atlanta,  
22 GA, USA  
23

24 <sup>4</sup>Emory-Tibet Partnership, CBCT® Teacher Training, Emory University, Atlanta, GA, USA  
25

26 <sup>5</sup>College of Nursing, University of Arizona  
27  
28

29  
30 \*Shared first authorship. These authors contributed equally to the manuscript.  
31  
32

33 **Corresponding author:**  
34

35 Corina Aguilar-Raab  
36

37 Institute of Medical Psychology, Center for Psychosocial Medicine, University Hospital,  
38 Heidelberg University  
39

40 Bergheimer Str. 20, 69115 Heidelberg, Germany  
41

42 Phone: +49 6221 56-8135  
43

44 E-mail: corina.aguilar-raab@med.uni-heidelberg.de  
45  
46  
47

48 Word count: 8730  
49

50 Date: 11/06/2017  
51

52 Version: v2  
53  
54  
55  
56  
57  
58  
59  
60

## Abstract

Introduction: Positive social interactions and stable relationships can exert substantial benefits on health. However, patients suffering from depression benefit less from these health-promoting effects. Moreover, relationship quality and even the partners' health were found to be negatively affected by depressive symptomatology, which may result in overall impairments in social functioning of a romantic couple. Psychobiological research showed that these impairments may be accompanied by a maladaptive regulation of the patient's neuroendocrine response to external stressors. Concerning the improvement of social functioning, first studies showed promising results of Cognitively-Based-Compassion-Training (CBCT®). However, randomized trials are still scarce. Previous programs did not involve participation of the patient's romantic partner. Therefore, the present study aims to investigate whether a CBCT® program adapted for couples (CBCT®-fC) can improve depressive symptoms, distress, social interaction skills, and the neurobiological regulation of stress.

Methods and Analysis: Couples with the female partner suffering from depression will be invited to participate in a pre-to-post intervention assessment on two consecutive days, respectively, involving a standardized positive social interaction (PSI) task, eye-tracking, electrocardiogram recordings, saliva and blood sampling, and questionnaire data. After baseline assessment, participating couples will be randomized to either a 10-weeks CBCT®-fC or to a treatment as usual control condition. The primary endpoint is the reduction of depressive symptoms as measured by the Hamilton Depression Rating Scale (HDRS). Secondary outcomes encompass self-rated depression (Beck Depression Inventory), attention towards the partners face during PSI (eye tracking), stress-related biomarkers (cortisol,  $\alpha$ -amylase, interleukins 1 $\beta$  & 6, heart rate variability), methylation of oxytocin-receptor- and serotonin-transporter-genes, and self-ratings of psychological constructs such as relationship quality and empathy.

Ethics and Dissemination: Ethical approval has been obtained by the Ethics Committee of the Medical Faculty Heidelberg. Results will be presented in international, peer-reviewed journals and on conferences in the field of clinical psychology and psychiatry.

Trial registration: From ClinicalTrials.gov., Identifier: NCT03080025 (registered: 08.03.2017).

1  
2  
3 Strengths and limitations of this study:

- 4 • This is the first randomized controlled trial to investigate the effects of a group-based  
5 compassion meditation program for couples (CBCT®-fC) with the female partner  
6 suffering from depression.  
7
- 8 • The study uses novel methods, assessing positive real-time social interaction of  
9 romantic partners in combination with psychobiological indicators of health.  
10
- 11 • This approach will shed light on the numerous processes involved in etiology and  
12 basic mechanisms of social functioning that are part of the psychopathology of  
13 depression.  
14
- 15 • Although comparison with TAU control group does not allow one to draw conclusions  
16 about the specificity of CBCT®-fC, differences in the extent of individuals' home  
17 practice may give some indications in this regard.  
18  
19  
20  
21  
22  
23  
24  
25  
26  
27  
28  
29  
30  
31  
32  
33  
34  
35  
36  
37  
38  
39  
40  
41  
42  
43  
44  
45  
46  
47  
48  
49  
50  
51  
52  
53  
54  
55  
56  
57  
58  
59  
60

## Background

Depression is one of the most prevalent mental disorders worldwide[1, 2]. Besides changes in self-referential affect and cognition, depressive disorders have been associated with social deficits. Impaired social functioning of depressive patients could account for both a worsening of the illness to chronic levels, and for a generally degraded physical health status, which in turn, may be accompanied by severe alterations of the biological stress and immune systems[1, 3]. It is crucial to examine how depressive patients' impaired social functioning maintains and/or aggravates the overall impact of the illness, and how disease progression interacts with the close social environment around a patient, in particular with the supportive partner[4].

### Impaired social functioning in depression

Positive social interactions can exert substantial benefits on health and even survival rates of individuals[1, 5]. For the majority of adults, couple relationships represent the central social bond and are the main source of social support. However, patients with chronic mental illnesses, such as depression, seem to benefit less from these health-protective effects. Current research has shown a bidirectional association between depression and relationship quality[6]. Problematic relationships may reinforce depressive symptoms in the romantic partners. However, depression and subsequent deficiencies in social functioning are strongly associated with a decrease in marital quality[7, 8]. Consequently, depression also affects the romantic partner and his/her health[9].

The incapacities for those with depression to socially connect and affiliate with others might lead to a tendency for social withdrawal and non-approaching behavior. Depressed individuals tend to be afraid of social rejection and the subsequent negative emotions and expect less support and kindness from others[10]. This may be accompanied by a reduced capacity to adaptively engage in social interaction and communication, and a diminished ability for empathic accuracy and perspective taking[11].

Underlying this, depressed individuals were found to exhibit biased information processing including a distorted attention for social stimuli[12]. Hence, impaired processing and attentional disengagement from negative self-referencing information take place, i.e. reduced maintenance of gaze towards positive stimuli, and in contrast, increased

1  
2  
3 maintenance of gaze towards negative stimuli[13, 14]. It is likely that this biased cognitive  
4 information processing may transfer to marital interaction as well.  
5  
6  
7

### 8 **Psychobiological underpinnings**

9  
10 While more research is still needed in order to understand how social-cognitive processes in  
11 couples may affect physical health outcomes[6], it seems consistent that severe or chronic  
12 levels of depression are associated with alterations in the psychobiological stress and  
13 immune systems, including cortisol, alpha-amylase (sAA), vagally mediated heart rate  
14 variability (vmHRV), and pro-inflammatory cytokine regulation (IL-6 and IL-1 $\beta$ , and high  
15 sensitive C-reactive protein (hsCRP). Furthermore, stress-associated alterations of  
16 methylation patterns in genes – specifically in genes encoding serotonin transporter  
17 activation (SLC6A4) - were found[15].  
18  
19

20 Maladaptive alterations in the hypothalamic-pituitary-adrenal (HPA) system's response to  
21 chronic stress have been proposed as a potential pathomechanism in the development of  
22 depressive disorders, with dysregulation of glucocorticoid release (in particular cortisol)  
23 being one of the most frequently studied phenomena[16, 17]. Changes in the diurnal  
24 rhythms of cortisol release seem to be involved in the disordered circadian physiology of  
25 sleep and body temperature rhythms. Increased levels of morning cortisol in particular have  
26 been related to subsequent depression[18, 19]. Moreover, depressive patients exhibit an  
27 intensified cortisol reaction in social stress tests. These findings, however, were found to be  
28 strongly dependent on moderating variables such as sex, measurement time, or type of  
29 stress task[20, 21].  
30  
31

32 Concerting the human stress response, the HPA axis interacts with the autonomic nervous  
33 system (ANS) when facing either acutely or chronically challenging situations, and recent  
34 studies highlight the importance of monitoring both systems simultaneously in order to gain  
35 full understanding of the pathomechanisms[22]. Acute stress seems to be related to higher  
36 momentary salivary alpha-amylase (sAA) activity. sAA is an enzyme mainly secreted by the  
37 parotid glands in response to adrenergic innervation, and has thus been studied as a proxy  
38 for the sympatho-adreno-medullary (SAM) branch of the ANS. sAA stimulation may involve  
39 activation of further physiological sub-systems (e.g. parasympathetic fibers)[23], and studies  
40 showed acute sAA changes to reflect ANS dysfunction in patients with mental disorders[24].  
41  
42 Furthermore, daily sAA secretion seems to be correlated with depression and feelings of  
43  
44  
45  
46  
47  
48  
49  
50  
51  
52  
53  
54  
55  
56  
57  
58  
59  
60

1  
2  
3 shame[25, 26]. In addition, before and after an electrical stimulation stressor, sAA levels  
4 were significantly larger than in depressed individuals compared to healthy controls[27].

5  
6 Previous research investigating the involvement of the parasympathetic branch has focused  
7 mainly on the study of vmHRV. Compared to healthy individuals, depressed patients showed  
8 parasympathetic withdrawal, and studies reported a negative association between  
9 depressive symptoms and resting state short-term measures of vmHRV[28, 29]. In contrast,  
10 higher levels of sadness were related to increased *circadian* variation of vmHRV measures,  
11 but only in females[30].

12  
13 Stress-related chronic HPA-axis and ANS dysfunctions can promote the release of cytokines  
14 from the macrophages, resulting in symptoms of fatigue and loss of appetite[31, 32].  
15 Depressed patients show higher levels of pro-inflammatory cytokines, particularly IL-6 and  
16 IL-1 $\beta$ , which were found to be indicative of a non-specific immune response[33, 34]. In line  
17 with these findings, administration of cytokines led to behavioral symptoms that are  
18 common in depression such as depressive mood or slowed psychomotor activity[32].

19  
20 Moreover, the vulnerability for depression – especially with regard to early adversity – is  
21 based on genetic factors in combination with environmental exposure across the lifespan.  
22 Gene-environment interactions change the risk to develop a depressive disorder. Altered  
23 gen expression is rooted in changes in chromatin structure – alterations in these epigenetic  
24 marks are connected to depression[35]. Changes in methylation in the promoter of the  
25 serotonin transporter gene SLC6A4 have been focused in several studies investigating  
26 depression. For example, decreased methylation of this promoter has been found in stress-  
27 exposed nurses who work in night-shifts and was related to burnout[36]. However in  
28 contrast, increased methylation was described in depressed patients with low quality of life  
29 and functioning[15]. These diverse findings may be due to the analysis of different Cytosin-  
30 phosphatidyl-Guanin (CpG) sites in each study[35]. Thus, while overall methylation of  
31 serotonin transporter genes and their expression seem significantly associated with the  
32 reactivity of HPA-axis and ANS in depression[37, 38], the precise direction of each specific  
33 alteration in the related CpGs needs further investigation. In accordance with the SLC6A4  
34 data, oxytocin receptor gene (OXTR) methylation patterns have been associated to neural  
35 activity to the perception/cognition of social stimuli[39] and relationship functioning[40]. In  
36 previous studies, interpersonal functioning – like rejection sensitivity or less support seeking,  
37 which is predominant in depressed individuals – was linked to OXTR gene  
38  
39  
40  
41  
42  
43  
44  
45  
46  
47  
48  
49  
50  
51  
52  
53  
54  
55  
56  
57  
58  
59  
60



1  
2  
3 polymorphisms[41]. To date, it remains unclear whether serotonin or oxytocin related  
4 epigenetic processes underlie alterations of interpersonal functioning in depression and  
5 might be interpreted as evaluation criteria for therapy.  
6  
7  
8

### 9 **Mindfulness, compassion and compassion-based interventions**

11 Mindfulness is defined as the intentional directing of attention towards the present moment  
12 combined with an attitude of acceptance and non-reactivity[42-44]. Mindfulness can be  
13 trained and increased through sustainable exercise such as breathing meditation. It is  
14 associated with coping-strategies in achieving a healthier or better handling with the inner  
15 stress-response towards perceived stressors.  
16  
17

18 Subsequent to the successful implementation of the Mindfulness Based Stress Reduction  
19 (MBSR) program[45-48], more scrutiny has been placed on understanding the change  
20 mechanisms. In a recent study we could show that enhanced mindfulness as a result of  
21 MBSR participation is accompanied by two other important health-related psychological  
22 constructs – distress tolerance and resilience[49]. In addition to the refined and revised  
23 approaches such as the Mindfulness Based Cognitive Therapy – MBCT[50, 51] current  
24 research in the field of “Contemplative Studies” focuses increasingly on compassion and on  
25 interventions such as the Cognitively-Based Compassion Training – CBCT®[52-54]. The  
26 definition of compassion highlights social aspects explicitly: In addition to the competency to  
27 recognize sorrowful states, compassion includes the prosocial motivation to deal with  
28 determining factors of suffering and to contribute to their change[55].  
29  
30  
31  
32  
33  
34  
35  
36  
37  
38

39 Secular meditation trainings addressing loving kindness and compassion can enhance  
40 positive emotions and social support that are associated with perceived social  
41 connectedness[56, 57]. Furthermore, they can lead to faster cortisol recovery subsequent to  
42 a social stress test and reduce inflammation[58]. However, studies (either laboratory or  
43 intervention) shedding light into the interplay between psychological and biological factors  
44 are still rare.  
45  
46  
47  
48

49 Mindfulness has already been successfully integrated into the couple context, such as  
50 mindfulness-based relationship enhancement[59], improving relationship satisfaction and  
51 functioning[59-61]. As far as couples are concerned, no study has yet investigated the  
52 impact of compassion enhancement on aspects of relationship quality. Current findings  
53 suggest a strong connection between self-compassion and healthy interpersonal relationship  
54  
55  
56  
57  
58  
59

1  
2  
3 functioning such as increased caring, kindness and higher levels of relatedness[62].  
4 Moreover, higher self-compassion was positively correlated to compromise behavior also in  
5 romantic relationships[63]. Given this background, the application of compassion training to  
6 depressive patients with impairments in interaction skills and their partners is a promising  
7 approach. Moreover, a group-based couple intervention additionally takes into account the  
8 partner's needs and may therefore provide a better integration of intervention benefits into  
9 patient couples' daily life.

10  
11 We therefore adapted a group-based compassion meditation training program (see below)  
12 for couples intending to improve social interactional functioning in depression and to  
13 positively influence psychobiological indicators of health and depression.  
14

## 15 16 17 18 19 20 21 22 **Objectives**

23 The proposed study aims to evaluate whether a CBCT<sup>®</sup>-fC intervention for couples with the  
24 female partner suffering from depression can

- 25 1. reduce depressive symptoms in the female partner,
- 26 2. improve social cognition processes and interpersonal skills of the female partner
- 27 3. reduce stress reactivity in social interactions in both partners associated to  
28 alterations in methylation patterns of SLC6A4 and OXTR.  
29

30 We expect the improvement of couples participating in CBCT<sup>®</sup>-fC to be superior compared  
31 to those receiving treatment as usual (TAU).  
32  
33

## 34 35 36 37 38 39 40 41 **Method**

### 42 43 **Study design, recruitment, and participants**

44 This study will be conducted in a prospective, parallel randomized controlled design,  
45 comparing CBCT<sup>®</sup>-fC with a TAU control condition. Changes from baseline to post-  
46 intervention assessment and from baseline to both a 4-week and 12-week follow up will be  
47 compared between the two study arms (Fig.1). Data assessment and interventions will be  
48 carried out at the Institute of Medical Psychology (IMP), Center for Psychosocial Medicine,  
49 University Hospital Heidelberg, Germany. The IMP will provide the biomarker preparation  
50 laboratory infrastructure for biomarker analysis (freezer space, centrifuge) and therapy  
51  
52  
53  
54  
55  
56  
57  
58  
59  
60

rooms equipped with audio and video devices for presentations/ exercises and assuring intervention adherence.

<insert Fig. 1>

We will use the following sources to recruit participants: Newspaper advertising, posters and flyers in public places, advertising in public transport, advertising in social media, university mailing lists. We will additionally contact registered doctors, psychiatric and psychosomatic clinics, as well as outpatient centers for counseling and psychotherapy.

Female patients are included if they 1) are at least 20 years old, 2) live in an exclusive romantic relationship since at least 2 years, and 3) are diagnosed with a primary recurrent depressive disorder (ICD-10: F33.0 or F33.1), validated by Structured Clinical Interview (SCID) of the Diagnostic and Statistical Manual of Mental Disorders (DSM-V)[64] in combination with the observer-based Hamilton Depression Rating Scale (HDRS)[65] and the Beck Depression Inventory (BDI-II) self-rating[66]. General exclusion criteria for the female patients are: 1) other severe mental disorders (such as psychotic symptoms; bipolar disorders, acute suicidal tendency), 2) altered physical condition (pregnancy, chronic or severe metabolic, endocrinological, neurological, nephrological, cardiac or hepatic conditions), 3) heavy smoking ( $\geq 20$  cigarettes/ day), substance abuse or acute addiction, 4) enrolling in psychological therapies (couple therapy; individual psychotherapy – except for probatory phase including a maximum of the first six sessions), 5) current participation in a mindfulness- or compassion-based group training.

Male partners are included if they 1) are at least 20 years of age, 2) are free of mental disorders such as depression or anxiety (detected by SCID, HDRS and BDI-II), 3) are free of chronic or severe metabolic, endocrinological, neurological, nephrological, cardiac or hepatic conditions.

## **Procedures**

### ***Baseline assessment***

After checking both individuals separately for general eligibility in an initial telephone screening, couples are invited to two consecutive laboratory days. On *lab day 1*, we will inform the participants about the study goals and procedures and ask them to fill out the

1  
2  
3 informed consent sheet. Participants will then be interviewed with the SCID and HDRS  
4 observer rating concerning the presence of mental (particularly depressive) disorders. While  
5 one partner is interviewed the other will be asked to fill out a number of questionnaires  
6 including the BDI-II and several scales on relationship quality, empathy, and symptom  
7 burden (see Table 1). Afterwards, a medical assistant will take a blood sample from both  
8 partners of approximately 25 ml each, using EDTA Vacutainers and PAXgene Blood RNA  
9 Tubes, allowing for the analysis of immune and epigenetic parameters. The genes SLC6A4  
10 and OXTR will be analyzed with regard to the methylation of CpG-sites and their promoter-  
11 regions referring to polymorphisms and mRNA-expression. Blood samples will be stored in  
12 the IMP's biochemical laboratory and will then be transferred to the Central Institute of  
13 Mental Health in Mannheim, Germany, and to the Central Laboratory at Heidelberg  
14 University for further analyses. Each individual then receives a one-lead ambulatory  
15 electrocardiogram (ECG) monitor (eMotion FAROS 180°) for 24h recording and will be  
16 instructed in the handling of the device.

17  
18 Lab day 2 takes part in our eye-tracking laboratory (IMP Heidelberg), where participating  
19 couples are comfortably seated facing each other, with a table in between serving as the  
20 eye-tracking platform. The first saliva sample will be taken after welcoming the participants.  
21 We then calibrate the eye-tracking setup. A scene camera is placed next to the women's  
22 head/eyes to capture her gaze perspective (i.e. the view on her partner). Gaze direction and  
23 fixations points will be recorded with a TOBII XT 60 remote eye-tracking device at 60Hz and  
24 mapped to the picture captured by the scene camera. Regions of interest are segmented  
25 into: partner's eyes, mouth, rest of the face, and off-face area.

26  
27 We then provide the participants with instructions for the PSI: First, couples receive a list of  
28 27 standardized conversation topics and are asked to choose topics they wish to talk about.  
29 Topics were adopted from the Problem List (PL) used in research on relationship conflict[67],  
30 but modified so that the conversational focus is on positive instead of negative issues (e.g.  
31 trust, financial security, and affection). Couples are verbally instructed to exclusively talk  
32 about positive content, to be supportive, to express compliments towards each other, and  
33 to change topics as soon as they notice the emergence of unpleasant feelings or subjects.  
34 Conversations will be videotaped and checked for protocol adherence. The experimenter  
35 then leaves the room and participants will perform the PSI for a total duration of 10 minutes  
36 according to the instructions. Before and after the PSI, the second and third saliva samples  
37  
38  
39  
40  
41  
42  
43  
44  
45  
46  
47  
48  
49  
50  
51  
52  
53  
54  
55  
56  
57  
58  
59  
60

1  
2  
3 are taken and couples fill out a 9-item self-constructed scale on acute mood. During the PSI,  
4 eye-tracking data of the female partner is continuously recorded. We will collect the fourth  
5 saliva sample 20 minutes after the PSI. During the waiting time and until discharge,  
6 participants are asked to complete a second set of questionnaires and to return the ECG  
7 devices. Procedures and assessments are summarized in figure 2. A participant flow chart  
8 can be found in figure 3.

9  
10 For all salivary samples, we utilize SaliCab tubes (RE69985 IBL International GmbH Hamburg,  
11 Germany) with the passive drool method. The samples will be stored at -80°C right after the  
12 experiment. Cortisol and  $\alpha$ -amylase will be assayed at the in-house laboratory of the IMP.

13  
14  
15  
16  
17  
18  
19  
20 <insert Fig.2>  
21  
22

### 23 ***Post-intervention assessment***

24  
25 After completion of baseline assessment, couples will be invited to participate in the training  
26 program or to continue their routine care plan for a duration of 10 weeks. After this  
27 interventional period (description see below), participants will undergo all assessments  
28 described above except for the SCID interview.  
29  
30  
31

### 32 ***Follow-up assessments***

33  
34 Two follow-up assessments will be conducted in both the treatment and TAU control group:  
35 Four and twelve weeks after completion of the training, the questionnaires administered at  
36 baseline will be distributed online (see Table 1). In case of a loss to follow-up, participants  
37 will be contacted and asked to state reasons in order to be able to analyze and interpret  
38 data and missing data appropriately.  
39  
40  
41  
42  
43  
44

### 45 ***Blinding and randomization***

46  
47 Part of the study personnel will be blinded regarding the status of group allocation  
48 (treatment vs. TAU). This includes the medical staff conducting the blood draw, all wet lab  
49 personnel and the assistants assessing the eye tracking. All participants will be informed  
50 about the general aims of the study. However, participants will not explicitly be informed  
51 about the operationalization of interaction behavior measures. Couples will be block-  
52 randomized to either treatment or control group with a computerized random-number  
53  
54  
55  
56  
57  
58  
59  
60

1  
2  
3 generator (www.random.org) after complete recruitment and baseline assessment of each  
4 study cohort. This procedure will be repeated until the intended number of participating  
5 couples is reached. A postdoctoral researcher of the IMP, who is otherwise not involved in  
6 the proposed study, will conduct randomization. Figure 3 depicts the CONSORT flow  
7 chart[68] of the present study.  
8  
9  
10

11  
12  
13 <insert Fig.3>  
14  
15

## 16 **Interventions**

17 All participants receive the standard treatment (TAU) for depression. This includes general  
18 practitioner care and contact with community mental health teams, at a minimum.  
19  
20  
21

### 22 ***CBCT®-fC – Cognitively-Based Compassion Training for Couples***

23 CBCT®[69] is a secular approach and was established as a structured protocol consisting of  
24 an either six-, eight- or ten-week training program with a 1.5 to 2-hour group session weekly  
25 and daily home practice based on pre-recorded guided meditations of 7 to 20 minutes for at  
26 least three days a week. In this study, we will implement a ten-week training program with  
27 2-hour weekly sessions, including class teachings explaining and discussing the rationale of  
28 the content of each of the six modules, group discussions and individual and dyadic guided  
29 contemplative practices. The text of the audio-based daily home practice is standardized and  
30 for the purpose of this study translated and audio-recorded into German by the same  
31 certified instructor who will also lead the treatment groups.  
32  
33  
34  
35  
36  
37  
38  
39

40 CBCT® focuses on six essential key parts for the development of compassion[53]: (1)  
41 developing attentional stability and clarity of the mind (focused attention and meditative  
42 concentration), (2) cultivating insight into the nature of mental experience (mindfulness with  
43 the focus to train non-judgment and non-reactivity with regard to the unfolding moment-to-  
44 moment experiences), (3) cultivating self-compassion – recognizing and understanding  
45 biased cognitions and reactions and enhancing self-efficacy, (4) developing impartiality by  
46 reflecting similarities with others such as the urge for well-being and happiness overcoming  
47 fixed categorizations of others into friends, enemies and strangers, (5) developing  
48 appreciation and affection for others by acknowledging our interdependent and  
49 interconnected nature, and finally (6) developing empathy and realizing engaged  
50  
51  
52  
53  
54  
55  
56  
57  
58  
59  
60

1  
2  
3 compassion – as an aspirational motivation and a readiness to altruistically act if possible  
4 and if needed. The intervention starts with an overview and basic instructions within the  
5 first session and end with a repetition, summary and take-home ideas for continuing  
6 practice during the last session. The first and the third module will be repeated once –  
7 resulting in a total of ten sessions. The main purpose of the program is to develop  
8 compassion for oneself and others as well as to increase compassionate responses and  
9 behaviors – particularly in a relationship.  
10  
11  
12  
13  
14  
15

16 For enhancement of positive reciprocity between the romantic partners several exercises  
17 and home-based practices are introduced which are based on a couple communication  
18 training[70-74] and on the protocol of the mindfulness-based relationship enhancement[75]:  
19 a) building mindful ability to talk, b) building mindful ability to listen (without reacting  
20 initially), c) appreciation in action – indulging the partner, d) “noticing, how the partner is  
21 doing something good for me” – gratefulness in action verbally/non-verbally. A dyadic  
22 empathy exercise has been added, with regard to the manual of the “Cognitive Behavioral  
23 Analysis System of Psychotherapy” for chronic major depression[48, 76]. Finally, the  
24 compassion meditation has been formalized as a dyadic exercise in addition to individual  
25 meditation[77].  
26  
27  
28  
29  
30  
31  
32  
33  
34  
35

### 36 ***Possible adverse events***

37 The intervention will be conducted with patients suffering from recurrent depressive  
38 disorder and their partners who might show some degree of burden and individual distress.  
39 Risks or side effects of the intervention and psychometric assessment are not known. The  
40 training can trigger negative emotional states, which will be addressed in the group sessions  
41 if necessary or in supplemental individual or couple therapy sessions (maximum of three  
42 additional sessions) optionally offered by study psychotherapists and study supervisor.  
43  
44  
45

46 The collection of a blood sample is usually associated with a very low risk. Slight pain may  
47 occur at the injection site or a bruise (blue spot) may appear, which may be visible for a few  
48 days. In extremely rare cases, the formation of a blood clot (thrombosis), localized  
49 inflammation or infection at the injection site may also arise, or permanent damage to blood  
50 vessels or nerves may happen. During the blood draws, the study physician is also present to  
51 identify any complications and side effects that may occur.  
52  
53  
54  
55  
56  
57  
58  
59  
60

### ***Treatment as usual (TAU)***

Couples assigned to the control group will start or continue with TAU (receiving medical treatment and primary health care) or will be waiting for starting individual therapy (average waiting time 3 months[78]). They will be asked to maintain their treatment plan during the study period of 10 weeks. Patients, who start participating in regular psychotherapy treatment during the study period, will be excluded from the analysis. All participants in the control group will be offered to participate in a CBCT<sup>®</sup>-fC after termination of the study (after the second follow-up).

### ***Adherence***

Couples' compliance with the CBCT<sup>®</sup>-fC meditations and exercises will be assessed via pen-paper questionnaires after each weekly in-house session using the Therapeutic Presence Inventory[79] (TPI, modified for the study), Practice Quality[80] (PQ-M, adapted version of the Practice Quality-Mindfulness) and the Scale for the Multiperspective Assessment of General Change Mechanisms in Psychotherapy (SACiP)[81]. The treatment group will receive one text message four times weekly during the ten-week period: This message acts as a reminder for the meditation practice and home-based exercises and captures which of the meditations or practices were completed and how long it took; in the case of non-performance, reasons are to be indicated. Furthermore, participants' emotional status is assessed via the Positive and Negative Affect Schedule (PANAS)[82]. The TAU control group will receive one text message per week during the same time period asking to indicate their emotional status.

### ***Primary outcome***

The primary study outcome is the reduction of depressive symptoms from baseline to post-intervention as measured by the HDRS observer-based rating. The HDRS is a standardized rating scale containing 21 items, scoring on 2- to 5-point scales, which will be administered twice (baseline, post-intervention). Psychometric properties are adequate with the internal consistency varying from 0.73 to 0.91[83].

### ***Secondary outcomes***



### ***Self-rated depressive symptoms***

In addition to the observer-based rating, we will monitor changes in self-rated depression via the BDI-II at four measurement times (baseline, post-intervention, follow-up I and II). The BDI-II is a standardized questionnaire comprising 21 items, scoring on a 0-3 scale. The internal consistency varies from 0.89 to 0.93 and the retest reliability ranged from 0.80 to 0.82[84].

### ***Eye tracking during PSI***

During the interaction task (PSI), the female partner's eye movements will be monitored with a remote eye tracker (Tobii X2-60, sampling rate 60Hz). Total gaze duration in milliseconds will be assessed via real-time eye-tracking during a standardized PSI with the romantic partner. Raw coordinates of gaze and fixation will be mapped to the following predefined areas of interest: 1. eyes, 2. mouth, 3. other regions of the face, 4. off face. In this study, we interpret eye-tracking data as an objective proxy for social cognition processes with regard to emotion-related information processing biases. We expect CBCT®-fC to result in an increased maintenance of gaze towards the partner's face during the instructed interaction, and thus, in a reduction of the social information processing biases accompanying the disorder.

### ***Cortisol & $\alpha$ -Amylase***

Cortisol and  $\alpha$ -Amylase will be collected as stress-sensitive biomarkers in sampling tubes for collection of saliva samples (RE69985 IBL International GmbH Hamburg, Germany) at four time-points (-20min, pre-post, +20min relative to PSI). The samples will be stored at -80°C and analyzed in the in-house laboratory of the IMP, Heidelberg, Germany. This data will be analyzed using area under the curve (AUC) approach[85], comparing changes over time between the two study arms. We expect participants in the experimental group to experience a reduction in HPA- and SAM-axis reactivity during the PSI after the intervention.

### ***IL-1 $\beta$ & IL6***

Interleukin (IL)-1 $\beta$  and IL-6 will be measured in blood samples on lab day 1. The samples will be stored at -80°C at the in-house lab and will then be sent to the Central Laboratory at Heidelberg University, where they will be processed by standard means. We expect CBCT®-

1  
2  
3 fc to result in a reduction of the concentration level of both of the two pro-inflammatory  
4 cytokines.  
5  
6  
7

### 8 ***Autonomic function (ECG)***

9  
10 An ECG will be assessed with a one-lead ambulatory monitor (eMotion FAROS 180° Mega  
11 Electronics Ltd. Kuopio Finland) sampling at 1000Hz for 24-hour recording. Each individual  
12 receives the monitor 24h prior to the PSI and will be instructed in the handling of the device.  
13 The 24h ECG will be segmented in 5 minutes intervals as recommended by the Task Force  
14 Guidelines[86] for HRV assessment. For each segment the following parameters will be  
15 derived using the package “RHRV” from the R-Project: Root mean square of successive  
16 differences (RMSSD), successive normal-to-normal (NN) intervals that differ by more than  
17 50msec (NN50), the proportion of NN50 divided by total number of NNs (PNN50) indexing  
18 vagal activity and the standard deviation of NN intervals (SDNN) with a resulting RR time  
19 series indexing mixed sympathetic and parasympathetic activity. ECG recordings will  
20 continue during the PSI, enabling us to analyze ANS reactivity to the interaction paradigm.  
21 We expect a stronger parasympathetic response to PSI after participation in CBCT®-fC.  
22 In an exploratory approach, a two-stage model will be used to additionally estimate  
23 circadian variation parameters of cardiac autonomic function over a 24h period: In a first  
24 step, three cosine function parameters (MESOR, Amplitude, and Acrophase) will be  
25 estimated using the ordinary least square method in trigonometric regression models per  
26 individual to capture individual circadian variation patterns. In a second step, these  
27 estimates will be forwarded as dependent variables to multivariate regression models for  
28 simultaneous effect estimation of CBCT®-fC on the circadian recovery profile.  
29  
30  
31  
32  
33  
34  
35  
36  
37  
38  
39  
40  
41  
42  
43

### 44 ***Epigenetics - SLC6A4 and OXTR***

45 The serotonin transporter gene SLC6A4 and the oxytocin receptor gene (OXTR) will be  
46 measured in blood samples on lab day 1. The PAXgene Blood RNA tubes are incubated at  
47 room temperature so that stabilizers in the tubes can become effective. The samples will be  
48 stored at -80°C at the in-house lab and will then be sent to the Laboratory at Mannheim  
49 University, where they will be processed by standard means. We expect CBCT®-fC to result  
50 in an alteration of the methylation pattern of both of the genes focusing on specific CpG-  
51 sites in their promoter-regions.  
52  
53  
54  
55  
56  
57  
58  
59  
60

### Statistical analysis

All outcome data incorporating repeated observations nested within individuals will be analyzed within 2-level hierarchical linear modeling. Repeated measures of the outcomes (e.g. 4 observations for the primary outcome, BDI) will be modeled as level-1 variables. Group assignment will be regarded as a level-2 predictor and the cross-level interaction will be tested for significant influence on the individual trajectories. Dependent variables that are measured simultaneously for patients and their partner (e.g. stress biomarkers) will be analyzed treating the dyad as a third hierarchy level, accounting for dependencies within a couple. Type-I error probability is set on  $\alpha = .05$  for all tests. Data based on an intention-to-treat approach will be compared to a completers-only dataset in the course of sensitivity analyses.

### Sample size

Power calculations were adapted for repeated-measures analysis of variance (ANOVA) enabling us to calculate the required sample size with G\*Power[87]. As multilevel modeling offers enhanced statistical power over a common ANOVA approach, the calculated number represents a conservative estimate. Power calculations are based on findings from Aalderen[88]. The authors investigated the effects of a mindfulness-based cognitive therapy for depressed patients within a large-scale RCT and found a medium sized effect of 0.53 standard deviations compared to a TAU condition on the HDRS (i.e. the primary outcome of our study). Assuming a comparable medium-sized effect ( $f = .25$ ) of the present CBCT®-fC over TAU from pre-to-post intervention, power analysis with G\*Power suggests a required sample size of  $N = 40$  ( $(1-\beta) = .80$ ,  $\rho = .40$ ). Accounting for approximately a 20% drop-out, we aim at randomizing  $N = 50$  couples into the study.

### Data monitoring

All training sessions will be video-taped and a selection will be reviewed by senior researchers. All PSI sessions will be videotaped and reviewed to ensure couples compliance to the PSI protocol. The laboratory sessions will be documented on checklists and reviewed by the senior staff. An experienced statistician will review all statistical analyses.

## Discussion

The SIDE study is the first investigation to examine multilevel effects of a compassion-based training program for couples with the female partner suffering from depression. The assessment protocol allows for a comprehensive evaluation of naturalistic real-time interaction of romantic partners and for an integrative analysis of underlying biomarker change. In combination with self-report and observer-based standard scales, this approach will enable us to advance the knowledge of the bio-psycho-social processes involved in etiology, progression and treatment of depressive disorders[89].

Recent data suggests that depressed patients benefit less from the stress-reducing effects of positive social interactions and high-quality relationships than healthy individuals, both in a psychological and a biological way. Among others, social cognition processes and several markers of stress-physiology and immune-responses such as cortisol, alpha-amylase, cytokine IL-6, and IL-1 $\beta$ , and vmHRV as well as epigenetic marks (SLC6A4 and OXTR) might be altered while couples are instructed to positively interact with each other. Whether depressed female patients also display less active positive behavior and an altered psychobiological response in real-time interaction remains to be examined.

With the SIDE study, we intend to address four innovative aspects of effectiveness research: First, the study will complement earlier preliminary evidence on the effects of CBCT<sup>®</sup> on clinical improvements by addressing research gaps concerning the associations between compassion and depression. Second, and related to the first point, specific aspects of the group intervention for enhancement of mindfulness and compassion on psychobiological concomitants will be elucidated. Third, the results will provide additional therapeutic tools to target a powerful mediator of health – the social relationship. Fourth, the male partner will be included in the group-based training taking into account his burden and addressing his needs, and thereby increase the chance for a better integration of interactional exchanges in daily routine.

### Possible limitations

Although comparison with the TAU control group impedes the drawing of conclusions about the specificity of CBCT<sup>®</sup> over and above non-specific therapeutic factors, differences in measures of the extend of individuals' engagement in home practice (i.e. time) may give some indications in that regard. Importantly, the training is thought to complement rather

1  
2  
3 than to replace individual therapy. Therefore, we are particularly interested if the TAU plus  
4 CBCT®-fC group improves with regard to the treatment outcomes via increased social  
5 functioning and reduced depressive and distress symptoms. In addition, both groups will  
6 have comparable TAU conditions and thus benefit from non-specific therapeutic factors,  
7 such as the therapeutic relationship and peer support. Furthermore, we will investigate the  
8 degree of active involvement with regard to the mindfulness and compassion meditations  
9 and dyadic exercises – both in-sessions and at home practice; allegiance will be controlled  
10 for potential bias effects.  
11  
12  
13  
14  
15

## 16 17 18 **Declarations**

### 19 20 **Ethics, consent and permissions**

21  
22 Participants will be informed according to the Declaration of Helsinki. Medical staff adheres  
23 to the professional code of conduct for doctors in Baden-Württemberg, Germany. Study  
24 participation is completely voluntary. Detailed written and oral information on study aims,  
25 procedure, benefits and risks will be provided. After written informed consent eligible  
26 participants will be enrolled. Full participation in the study assessments will be financially  
27 compensated. The IMP will fully cover costs for the CBCT®-fC. Ethical approval has been  
28 obtained from the ethics committee of the Medical School Heidelberg, Heidelberg  
29 University, Germany (S-021/2016). In case any changes have to be made with regard to the  
30 study protocol, these will be communicated with the ethics committee.  
31  
32  
33  
34  
35  
36  
37  
38

### 39 40 **Availability of data and material**

41  
42 Research data will be made available for future research by other researchers anonymously  
43 via the Competence Centre for Research Data (Heidelberg University) using the platform  
44 heiDATA (the university's research data repository) in line with its Research Data Policy  
45 adopted by Heidelberg University: <http://www.data.uni-heidelberg.de/services.html>  
46 Confidential information of all participants is subject to data protection. Data will only be  
47 passed on to third parties in anonymized form.  
48  
49  
50  
51  
52

### 53 54 **Competing interests**

55 The authors declare that they have neither competing interests nor conflict of interest.  
56  
57  
58  
59  
60

### **Funding**

The study is mainly funded by the Institute of Medical Psychology, University Hospital Heidelberg, and partly by the Mind and Life Organization as well as by the Deutsche Gesellschaft für Systemische Therapie, Beratung und Familientherapie. Further funding is pending.

### **Author's contributions**

CAR and MNJ drafted the first version of the manuscript sharing the first authorship as they contributed equally. MT and JB supported this process. BD, TN, TH and TWWP delivered critical feedback on a first version of the paper – TN and TH focusing especially on the treatment part. CAR, MNJ, MW and JB critically revised and drafted the second version of the manuscript. CAR, MNJ and BD contributed to the design of the study. All authors have approved the final version of the manuscript.

### **Acknowledgments**

We would like to acknowledge the Mind and Life Institute providing financial support in part for the preparation phase in form of the Francisco J. Varela Award, which Dr. Aguilar-Raab received in order to modify and extend the CBCT® protocol to suit couples in close collaboration with experts in the field. Furthermore, we thank the Institute for Medical Psychology, University Hospital Heidelberg and staff members for providing financial and infrastructural support. Marc N. Jarczok and Marco Warth are supported by the Physician-Scientist-Program of the Medical Faculty at Heidelberg University. We also would like to acknowledge financial support by Deutsche Forschungsgemeinschaft and Ruprecht-Karls-Universität Heidelberg within the funding programme Open Access Publishing.

**Table 1** Overview of measures

| Short Name                                                                         | Name                                                                          | Pre-Treatment<br>(CBCT®-fC<br>vs. TAU) | Post-Treatment<br>(CBCT®-fC<br>vs. TAU) | Comments                                                                                              |
|------------------------------------------------------------------------------------|-------------------------------------------------------------------------------|----------------------------------------|-----------------------------------------|-------------------------------------------------------------------------------------------------------|
| BDI                                                                                | Beck Depression Inventory[66]                                                 | X                                      | X                                       |                                                                                                       |
| BSSS                                                                               | Berliner Social Support Skalen[90]                                            | X                                      | X                                       |                                                                                                       |
| Checklist for blood samples<br>(e.g: medication in the last<br>24h, Alcohol, etc.) |                                                                               | X                                      | X                                       |                                                                                                       |
| Checklist for ECG (e.g.:<br>quality of sleep, pain, etc.)                          |                                                                               | X                                      | X                                       |                                                                                                       |
| Checklist for Saliva sample<br>(e.g: medication in the last<br>24h, Alcohol, etc.) |                                                                               | X                                      | X                                       |                                                                                                       |
| CLE                                                                                | <i>Critical Life Events</i>                                                   | X                                      | X                                       |                                                                                                       |
| CLS                                                                                | Compassionate Love Scale[91]                                                  | X                                      | X                                       |                                                                                                       |
| CTQ                                                                                | Childhood Trauma Questionnaire[92]                                            | X                                      |                                         |                                                                                                       |
| Demographic questionnaire<br>(e.g.: Nationality, job, etc.)                        |                                                                               | X                                      | X                                       | Gynecological questions for women<br>questionnaire are included (e.g.: pregnancy,<br>menopause, etc.) |
| EQ                                                                                 | Empathy Quotient[93]                                                          | X                                      | X                                       |                                                                                                       |
| EVOS                                                                               | Evaluation of Social Systems Scale[94]                                        | X                                      | X                                       |                                                                                                       |
| HDRS                                                                               | Hamilton Depression Rating Scale[65]                                          | X                                      | X                                       |                                                                                                       |
| UCLA-LS                                                                            | UCLA-Loneliness-Scale[95] (German version: Hamburger<br>Einsamkeitsskala[96]) | X                                      | X                                       |                                                                                                       |
| IIP                                                                                | Inventory of Interpersonal Problems[97, 98]                                   | X                                      |                                         |                                                                                                       |
| KIMS                                                                               | Kentucky Inventory of Mindfulness Skills[99, 100]                             | X                                      | X                                       |                                                                                                       |
| PBD                                                                                | Partner Burden in Depression (constructed in relation to the<br>PHQ-9)        | X                                      | X                                       | For Men only                                                                                          |
| PFB                                                                                | Partnership Questionnaire[101, 102]                                           | X                                      | X                                       |                                                                                                       |
| PHQ-9                                                                              | Patient Health Questionnaire[103, 104]                                        | X                                      | X                                       |                                                                                                       |
| RAS (Item 2)                                                                       | Second Item from the Relationship Assessment Scale[105, 106]                  | X                                      | X                                       |                                                                                                       |
| SCID                                                                               | The Structured Clinical Interview for DSM-IV Axis I<br>Disorders[107, 108]    | X                                      |                                         |                                                                                                       |
| SCS                                                                                | Self Compassion Scale[109, 110]                                               | X                                      | X                                       |                                                                                                       |
| TICS                                                                               | Trier Inventory for chronic Stress[111]                                       | X                                      | X                                       |                                                                                                       |

## Figure captions

### Fig. 1 Study Design.

PSI = Positive Social Interaction; TAU = Treatment as usual; CBCT<sup>®</sup>-fC = Cognitively-Based Compassion Training for Couples; T1 = measurement point 1 (baseline); T2 = measurement point 2 (post intervention); FU1/2 = follow-up 1 and 2

### Fig. 2 Assessments.

PSI = Positive Social Interaction, ECG = electrocardiogram, CVP = circadian variation pattern, HRV = heart rate variability, IL = interleukin

### Fig. 3 Flow diagram

HDRS = Hamilton Depression Rating Scale, BDI = Beck Depression Inventory, SCID = Structured Clinical Interview for DSM, ECG = electrocardiogram, PSI = positive social interaction, CBCT<sup>®</sup>-fC = Cognitively-Based Compassion Training for Couples, TAU = Treatment as usual, TPI = Therapeutic Presence Inventory, PQ = Practice Quality, SACiP = Scale for the Miltiperspective Assessment of General Change Mechanisms in Psychotherapy



**Abbreviations**

AUC: Area under the Curve; BDI-II: Beck Depression Inventory; CAN: Central Autonomic Network; CBCT<sup>®</sup>-fC: CBCT<sup>®</sup> for Couples; CpG: Cytosin-phosphatidyl-Guanin sites; HDRS: Hamilton Depression Rating Scale; HPA: hypothalamic-pituitary-adrenal; NIMH: National Institute of Mental Health; OXTR: oxytocin receptor gene; PANAS: Positive and Negative Affect Schedule; PC: patient couple; PNN50: proportion of NN50 divided by total number of NNS; PQ-M: Practice Quality-Mindfulness; PSI: positive social interaction; RCT: randomized controlled trial; RMSSD: root mean square of successive differences; sAA: saliva alpha-amylase; SACiP: Scale for the Multiperspective Assessment of General Change Mechanisms in Psychotherapy; SAM: sympatho-adreno-medullary; SCID: Structured Clinical Interview for DSM; SDNN: standard deviation of NN intervals; SLC6A4: serotonin transporter gene; TAU: treatment as usual; TPI: Therapeutic Presence Inventory; vmHRV: vagally mediated heart rate variability

## References

1. Kessler RC, Bromet EJ. The epidemiology of depression across cultures. *Annu Rev Public Health* 2013;34:119-38. doi: 10.1146/annurev-publhealth-031912-114409
2. Carney RM, Freedland KE, Veith RC. Depression, the autonomic nervous system, and coronary heart disease. *Psychosom Med* 2005;67(1):S29-33. doi: 10.1097/01.psy.0000162254.61556.d5
3. Vaillant GE, Mukamal K. Successful aging. *The American Journal of Psychiatry* 2001;158(6):839-47. doi: 10.1176/appi.ajp.158.6.839
4. Beach SRH, Wamboldt MZ, Kaslow NJ, et al. Describing relationship problems in DSM-V: toward better guidance for research and clinical practice. *Journal of Family Psychology: journal of the Division of Family Psychology of the American Psychological Association (Division 43)* 2006;20(3):359-68. doi: 10.1037/0893-3200.20.3.359
5. Ditzen B, Heinrichs M. Psychobiology of social support: the social dimension of stress buffering. *Restorative neurology and neuroscience* 2014;32(1):149-62. doi: 10.3233/rnn-139008 [published Online First: 2013/04/23]
6. Robles TF, Slatcher RB, Trombello JM, et al. Marital quality and health: A meta-analytic review. *Psychological Bulletin* 2014;140(1):140-87. doi: 10.1037/a0031859
7. Hirschfeld RM, Montgomery SA, Keller MB, et al. Social functioning in depression: a review. *J Clin Psychiatry* 2000;61(4):268-75.
8. Fink BC, Shapiro AF. Coping Mediates the Association Between Marital Instability and Depression, but Not Marital Satisfaction and Depression. *Couple Family Psychol* 2013;2(1):1-13. doi: 10.1037/a0031763
9. Rehman US, Gollan J, Mortimer AR. The marital context of depression: research, limitations, and new directions. *Clin Psychol Rev* 2008;28(2):179-98. doi: 10.1016/j.cpr.2007.04.007
10. Overall NC, Hammond MD. Biased and accurate: depressive symptoms and daily perceptions within intimate relationships. *Personality & social psychology bulletin Society for Personality and Social Psychology* 2013;39(5):636-50. doi: 10.1177/0146167213480188
11. Kupferberg A, Hager OM, Fischbacher U, et al. Testing the social competition hypothesis of depression using a simple economic game. *British Journal of Psychiatry Open* 2016;2(2):163-69. doi: 10.1192/bjpo.bp.115.001362
12. Armstrong T, Olatunji BO. Eye tracking of attention in the affective disorders: a meta-analytic review and synthesis. *Clin Psychol Rev* 2012;32(8):704-23. doi: 10.1016/j.cpr.2012.09.004
13. Joormann J, Gotlib IH. Selective attention to emotional faces following recovery from depression. *J Abnorm Psychol* 2007;116(1):80-5. doi: 10.1037/0021-843X.116.1.80
14. Sears C, Newman K, Ference J, et al. Attention to emotional images in previously depressed individuals: An eye-tracking study. *Cognit Ther Res* 2011;35(6):517-28. doi: 10.1007/s10608-011-9396-5
15. Kang HJ, Kim JM, Stewart R, et al. Association of SLC6A4 methylation with early adversity, characteristics and outcomes in depression. *Progress in neuro-psychopharmacology & biological psychiatry* 2013;44:23-8. doi: 10.1016/j.pnpbp.2013.01.006 [published Online First: 2013/01/22]
16. Holsboer F. The corticosteroid receptor hypothesis of depression. *Neuropsychopharmacology* 2000;23(5):477-501. doi: 10.1016/S0893-133X(00)00159-7
17. Palazidou E. The neurobiology of depression. *Br Med Bull* 2012;101(1):127-45. doi: 10.1093/bmb/lds004
18. Herbert J. Cortisol and depression: three questions for psychiatry. *Psychol Med* 2013;43(3):449-69. doi: 10.1017/S0033291712000955
19. Morris MC, Compas BE, Garber J. Relations among posttraumatic stress disorder, comorbid major depression, and HPA function: a systematic review and meta-analysis. *Clin Psychol Rev* 2012;32(4):301-15. doi: 10.1016/j.cpr.2012.02.002

20. Burke HM, Davis MC, Otte C, et al. Depression and cortisol responses to psychological stress: a meta-analysis. *Psychoneuroendocrinology* 2005;30(9):846-56. doi: 10.1016/j.psyneuen.2005.02.010
21. Stielor JT, Bullmann T, Kohl F, et al. The physiological link between metabolic rate depression and tau phosphorylation in mammalian hibernation. *PLoS one* 2011;6(1):e14530. doi: 10.1371/journal.pone.0014530
22. Booij SH, Bos EH, Bouwmans ME, et al. Cortisol and alpha-amylase secretion patterns between and within depressed and non-depressed individuals. *PLoS one* 2015;10:e0131002.
23. Bosch JA, Veerman EC, de Geus EJ, et al. Alpha-amylase as a reliable and convenient measure of sympathetic activity: Don't start salivating just yet! *Psychoneuroendocrinology* 2011;36:449-53.
24. Schumacher S, Kirschbaum C, Fydrich T, et al. Is salivary alpha-amylase an indicator of autonomic nervous system dysregulations in mental disorders? A review of preliminary findings and the interactions with cortisol. *Psychoneuroendocrinology* 2013;38(6):729-43. doi: 10.1016/j.psyneuen.2013.02.003
25. Nater UM, Rohleder N. Salivary alpha-amylase as a non-invasive biomarker for the sympathetic nervous system: Current state of research. *Psychoneuroendocrinology* 2009;34:486-96.
26. Rohleder N, Chen E, Wolf JM, et al. The psychobiology of trait shame in young women: extending the social self preservation theory. *Health Psychol* 2008;27(5):523-32. doi: 10.1037/0278-6133.27.5.523
27. Tanaka Y, Ishitobi Y, Maruyama Y, et al. Salivary alpha-amylase and cortisol responsiveness following electrical stimulation stress in major depressive disorder patients. *Progress in neuro-psychopharmacology & biological psychiatry* 2012;36:220-4.
28. Kemp AH, Quintana DS. The relationship between mental and physical health: insights from the study of heart rate variability. *Int J Psychophysiol* 2013;89(3):288-96. doi: 10.1016/j.ijpsycho.2013.06.018
29. Kemp AH, Quintana DS, Gray MA, et al. Impact of depression and antidepressant treatment on heart rate variability: A review and meta-analysis. *Biological Psychiatry* 2010;67:1067-74.
30. Verkuil B, Brosschot JF, Marques AH, et al. Gender differences in the impact of daily sadness on 24-h heart rate variability. *Psychophysiology* 2015;52:1682-8.
31. Maletic V, Robinson M, Oakes T, et al. Neurobiology of depression: an integrated view of key findings. *Int J Clin Pract* 2007;61(12):2030-40. doi: 10.1111/j.1742-1241.2007.01602.x
32. Miller AH, Raison CL. The role of inflammation in depression: from evolutionary imperative to modern treatment target. *Nature Reviews Immunology* 2016;16(1):22-34. doi: 10.1038/nri.2015.5
33. Pace TWW, Mletzko TC, Alagbe O, et al. Increased stress-induced inflammatory responses in male patients with major depression and increased early life stress. *The American Journal of Psychiatry* 2006;163(9):1630-3. doi: 10.1176/appi.ajp.163.9.1630
34. Raison CL, Capuron L, Miller AH. Cytokines sing the blues: inflammation and the pathogenesis of depression. *Trends Immunol* 2006;27(1):24-31. doi: 10.1016/j.it.2005.11.006
35. Menke A, Binder EB. Epigenetic alterations in depression and antidepressant treatment. *Dialogues in Clinical Neuroscience* 2014;16(3):395-404.
36. Alasaari JS, Lagus M, Ollila HM, et al. Environmental stress affects DNA methylation of a CpG rich promoter region of serotonin transporter gene in a nurse cohort. *PLoS one* 2012;7(9):e45813. doi: 10.1371/journal.pone.0045813 [published Online First: 2012/10/03]
37. Klengel T, Pape J, Binder EB, et al. The role of DNA methylation in stress-related psychiatric disorders. *Neuropharmacology* 2014;80:115-32. doi: 10.1016/j.neuropharm.2014.01.013 [published Online First: 2014/01/24]
38. Voisey J, Young RM, Lawford BR, et al. Progress towards understanding the genetics of posttraumatic stress disorder. *J Anxiety Disord* 2014;28(8):873-83. doi: 10.1016/j.janxdis.2014.09.014

- 1  
2  
3 39. Jack A, Connelly JJ, Morris JP. DNA methylation of the oxytocin receptor gene predicts neural  
4 response to ambiguous social stimuli. *Frontiers in human neuroscience* 2012;6:280. doi:  
5 10.3389/fnhum.2012.00280 [published Online First: 2012/10/23]
- 6 40. Walum H, Lichtenstein P, Neiderhiser JM, et al. Variation in the oxytocin receptor gene (OXTR) is  
7 associated with pair-bonding and social behavior. *Biological Psychiatry* 2012;71(5):419-26.  
8 doi: 10.1016/j.biopsych.2011.09.002
- 9 41. Woods R, Bedard M, McQuaid RJ, et al. Rejection sensitivity and multiple group memberships:  
10 The moderating role of an oxytocin receptor gene polymorphism. *Social neuroscience*  
11 2017:1-9. doi: 10.1080/17470919.2017.1327458 [published Online First: 2017/05/06]
- 12 42. Shapiro SL, Carlson LE, Astin JA, et al. Mechanisms of mindfulness. *Journal of Clinical Psychology*  
13 2006;62(3):373-86. doi: 10.1002/jclp.20237 [published Online First: 2005/12/31]
- 14 43. Kabat-Zinn J. Full catastrophe living: Using the wisdom of your mind and body to face stress, pain,  
15 and illness: New York: Delacorte, 1990.
- 16 44. Bishop SR, Lau M, Shapiro S, et al. Mindfulness: A proposed operational definition. *Clinical*  
17 *Psychology Science and Practice* 2004;11:230-41.
- 18 45. Grossman P, Niemann L, Schmidt S, et al. Mindfulness-based stress reduction and health benefits:  
19 A meta-analysis. *Journal of Psychosomatic Research* 2004;57(1):35-43. doi:  
20 [http://dx.doi.org/10.1016/S0022-3999\(03\)00573-7](http://dx.doi.org/10.1016/S0022-3999(03)00573-7)
- 21 46. Kabat-Zinn J. Mindfulness-based interventions in context: Past, present, and future. *Clinical*  
22 *Psychology-Science and Practice* 2003;10(2):144-56. doi: 10.1093/clipsy/bpg016
- 23 47. Keng SL, Smoski MJ, Robins CJ. Effects of mindfulness on psychological health: A review of  
24 empirical studies. *Clinical Psychology Review* 2011;31(6):1041-56. doi:  
25 10.1016/j.cpr.2011.04.006
- 26 48. Michalak J, Schultze M, Heidenreich T, et al. A randomized controlled trial on the efficacy of  
27 mindfulness-based cognitive therapy and a group version of cognitive behavioral analysis  
28 system of psychotherapy for chronically depressed patients. *J Consult Clin Psychol*  
29 2015;83(5):951-63. doi: 10.1037/ccp0000042
- 30 49. Nila K, Holt DV, Ditzen B, et al. Mindfulness-based stress reduction (MBSR) enhances distress  
31 tolerance and resilience through changes in mindfulness. *Mental Health & Prevention*  
32 2016;4(1):36-41. doi: 10.1016/j.mhp.2016.01.001
- 33 50. Khoury B, Lecomte T, Fortin G, et al. Mindfulness-based therapy: A comprehensive meta-analysis.  
34 *Clinical Psychology Review* 2013;33(6):763-71. doi:  
35 <http://dx.doi.org/10.1016/j.cpr.2013.05.005>
- 36 51. Segal ZV, Williams JMG, Teasdale JD. Mindfulness-Based Cognitive Therapy for Depression. 1 ed.  
37 New York: Guilford Press 2002.
- 38 52. Ozawa-de Silva B, Negi LT. Cognitively-Based Compassion Training (CBCT): Protokoll und  
39 Schlüsselkonzepte. In: Singer T, Bolz M, eds. Mitgefühl in Alltag und Forschung. München:  
40 Max Planck Society 2013:434-57.
- 41 53. Dodds SE, Pace TW, Bell ML, et al. Feasibility of Cognitively-Based Compassion Training (CBCT) for  
42 breast cancer survivors: a randomized, wait list controlled pilot study. *Support Care Cancer*  
43 2015;23(12):3599-608. doi: 10.1007/s00520-015-2888-1 [published Online First: 2015/08/16]
- 44 54. Desbordes G, Negi LT, Pace TW, et al. Effects of mindful-attention and compassion meditation  
45 training on amygdala response to emotional stimuli in an ordinary, non-meditative state.  
46 *Frontiers in human neuroscience* 2012;6:292. doi: 10.3389/fnhum.2012.00292 [published  
47 Online First: 2012/11/06]
- 48 55. Strauss C, Lever Taylor B, Gu J, et al. What is compassion and how can we measure it? A review of  
49 definitions and measures. *Clinical Psychology Review* 2016;47:15-27. doi:  
50 [doi:http://doi.org/10.1016/j.cpr.2016.05.004](http://doi.org/10.1016/j.cpr.2016.05.004)
- 51 56. Fredrickson BL, Cohn MA, Coffey KA, et al. Open hearts build lives: positive emotions, induced  
52 through loving-kindness meditation, build consequential personal resources. *J Pers Soc*  
53 *Psychol* 2008;95(5):1045-62. doi: 10.1037/a0013262
- 54  
55  
56  
57  
58  
59  
60

- 1
- 2
- 3 57. Hutcherson CA, Seppala EM, Gross JJ. Loving-kindness meditation increases social connectedness. *Emotion (Washington, DC)* 2008;8(5):720-4. doi: 10.1037/a0013237
- 4
- 5 58. Pace TWW, Negi LT, Adame DD, et al. Effect of compassion meditation on neuroendocrine, innate
- 6 immune and behavioral responses to psychosocial stress. *Psychoneuroendocrinology*
- 7 2009;34(1):87-98. doi: 10.1016/j.psyneuen.2008.08.011
- 8 59. Carson JW, Carson KM, Gil KM, et al. Mindfulness-based relationship enhancement (MBRE) in
- 9 couples. In: Baer RA, ed. *Mindfulness-based treatment approaches: Clinician's guide to*
- 10 *evidence base and applications*. Burlington, MA: Academic Press 2006:309-31
- 11 60. Wachs K, Cordova JV. Mindful relating: exploring mindfulness and emotion repertoires in
- 12 intimate relationships. *J Marital Fam Ther* 2007;33(4):464-81. doi: 10.1111/j.1752-
- 13 0606.2007.00032.x [published Online First: 2007/10/16]
- 14 61. Barnes S, Brown KW, Krusemark E, et al. The role of mindfulness in romantic relationship
- 15 satisfaction and responses to relationship stress. *J Marital Fam Ther* 2007;33(4):482-500. doi:
- 16 10.1111/j.1752-0606.2007.00033.x [published Online First: 2007/10/16]
- 17 62. Neff KD, Beretvas SN. The role of self-compassion in romantic relationships. *Self and Identity*
- 18 2013;12(1):78-98. doi: 10.1080/15298868.2011.639548
- 19 63. Yarnell LM, Neff KD. Self-compassion, interpersonal conflict resolutions, and well-being. *Self*
- 20 *Identity* 2013;12:146-59.
- 21 64. Falkai P, Wittchen H-U. Diagnostisches und Statistisches Manual Psychischer Störungen - DSM-
- 22 52014:1298.
- 23 65. Hamilton M. A rating scale for depression. *J Neurol Neurosurg Psychiatry* 1960;23:56-62.
- 24 66. Beck AT, Steer RA, Ball R, et al. Comparison of Beck Depression Inventories -IA and -II in
- 25 psychiatric outpatients. *J Pers Assess* 1996;67(3):588-97. doi: 10.1207/s15327752jpa6703\_13
- 26 67. Hahlweg K, Kraemer M, Schindler L, et al. Partnerschaftsprobleme: Eine empirische Analyse.
- 27 *Zeitschrift für Klinische Psychologie* 1980;9:159-69.
- 28 68. Altman DG, Schulz KF, Moher D, et al. The revised CONSORT statement for reporting randomized
- 29 trials: explanation and elaboration. *Ann Intern Med* 2001;134(8):663-94. [published Online
- 30 First: 2001/04/17]
- 31 69. Ozawa-de Silva B, Negi LT. Cognitively-Based Compassion Training: Protocol and Key Concepts.
- 32 Singer, T and Bolz, M *Compassion: Bridging Theory and Practice*. Leipzig: Max Planck Institute
- 33 *for Human Cognitive and Brain Sciences*2013:416-38.
- 34 70. Beach SR, Sandeen EE, O'leary KD. *Depression in Marriage*. New York:1990.
- 35 71. Cohen S, Daniel O'Leary K, Foran HM, et al. Mechanisms of change in brief couple therapy for
- 36 depression. *Behav Ther* 2014;45(3):402-17. doi: 10.1016/j.beth.2014.01.003
- 37 72. Hahlweg K, Baucom DH. *Partnerschaft und Sörung*. 1 ed: Hogrefe 2008.
- 38 73. Kröger C, Heinrichs N, Hahlweg K. Kompetenz-, Kommunikations- und Problemlösetraining
- 39 [Competence training, communication training, and problem-solving training]. In: Hautzinger
- 40 M, Pauli P, eds. *Göttingen: Hogrefe* 2009.
- 41 74. Schindler L, Hahlweg K, Revenstorf D. *Partnerschaftsprobleme: Diagnose und Therapie.*
- 42 *Handbuch für den Therapeuten*. 2 ed. Berlin: Springer 2006.
- 43 75. Carson JW, Carson KM, Gil KM, et al. Mindfulness-Based Relationship Enhancement. *Behav Ther*
- 44 2003;35(3):471-94.
- 45 76. McCullough Jr J. *Treatment for chronic depression: CBASP*. New York: Guilford 2000.
- 46 77. Singer T, Bornemann B. *The ReSource Training Protocol*. Singer, T and Bolz, M *Compassion:*
- 47 *Bridging practice and science*. Leipzig: Max Planck Institute for Human Cognitive and Brain
- 48 *Sciences*2013:452-65.
- 49 78. Bundespsychotherapeutenkammer. 2011.
- 50 79. Geller SM, Greenberg LS, Watson JC. Therapist and client perceptions of therapeutic presence:
- 51 the development of a measure. *Psychotherapy Research* 2010;20(5):599-610. doi:
- 52 10.1080/10503307.2010.495957
- 53
- 54
- 55
- 56
- 57
- 58
- 59
- 60

- 1  
2  
3 80. Del Re AC, Fluckiger C, Goldberg SB, et al. Monitoring mindfulness practice quality: an important  
4 consideration in mindfulness practice. *Psychotherapy Research* 2013;23(1):54-66. doi:  
5 10.1080/10503307.2012.729275
- 6 81. Mander J. The individual therapy process questionnaire: development and validation of a revised  
7 measure to evaluate general change mechanisms in psychotherapy. *Clin Psychol Psychother*  
8 2015;22(4):328-45. doi: 10.1002/cpp.1892
- 9 82. Watson D, Clark LA, Tellegen A. Development and Validation of Brief Measures of Positive and  
10 Negative Affect: The PANAS Scales. *J Pers Soc Psychol* 1988;54(6):1063-70.
- 11 83. Baumann U. Methodische Untersuchungen zur Hamilton-Depression-Skala. *Arch Psychiatr*  
12 *Nervenkr* 1976;222(4):359-75.
- 13 84. Herzberg PY, Goldschmidt S, Heinrichs N. Beck Depressions-Inventar (BDI-II). Revision. *TBS-TK*  
14 *Rezesion* 2008
- 15 85. Pruessner JC, Kirschbaum C, Meinlschmid G, et al. Two formulas for computation of the area  
16 under the curve represent measures of total hormone concentration versus time-dependent  
17 change. *Psychoneuroendocrinology* 2003;28(7):916-31.
- 18 86. Heart rate variability: Standards of measurement, physiological interpretation, and clinical use.  
19 Task Force of The European Society of Cardiology and The North American Society of Pacing  
20 and Electrophysiology. *Circulation* 1996;93(5):1043-65.
- 21 87. Faul F, Erdfeld E, Lang AG, et al. A flexible statistical power analysis program for the social,  
22 behavioral, and biomedical sciences. *Behav Res Methods* 2007;39(2):175-91.
- 23 88. van Aalderen JR, Donders AR, Giommi F, et al. The efficacy of mindfulness-based cognitive  
24 therapy in recurrent depressed patients with and without a current depressive episode: a  
25 randomized controlled trial. *Psychol Med* 2012;42(5):989-1001. doi:  
26 10.1017/s0033291711002054 [published Online First: 2011/10/25]
- 27 89. National Institute of Mental Health. Research Domain Criteria (RDoC) 2013 [Available from:  
28 [https://www.nimh.nih.gov/research-priorities/rdoc/development-and-definitions-of-the-](https://www.nimh.nih.gov/research-priorities/rdoc/development-and-definitions-of-the-rdoc-domains-and-constructs.shtml)  
29 [rdoc-domains-and-constructs.shtml](https://www.nimh.nih.gov/research-priorities/rdoc/development-and-definitions-of-the-rdoc-domains-and-constructs.shtml)] accessed 02.02.2017.
- 30 90. Schulz U, Schwarzer R. Soziale Unterstützung bei der Krankheitsbewältigung: Die Berliner Social  
31 Support Skalen (BSSS). *Diagnostica* 2003;49(2):73-82.
- 32 91. Sprecher S, Fehr B. Compassionate love for close others and humanity. *Journal of Social and*  
33 *Personal Relationships* 2005 doi: 10.1177/0265407505056439
- 34 92. Bernstein DP, Fink L. Childhood Trauma Questionnaire: A retrospective self-report manual. San  
35 Antonio: TX: The Psychological Corporation 1998.
- 36 93. Baron-Cohen S, Wheelwright S. The empathy quotient: an investigation of adults with Asperger  
37 syndrome or high functioning autism, and normal sex differences. *J Autism Dev Disord*  
38 2004;34(2):163-75.
- 39 94. Aguilar-Raab C, Grevenstein D, Schweitzer J. Measuring Social Relationships in Different Social  
40 Systems: The Construction and Validation of the Evaluation of Social Systems (EVOS) Scale.  
41 *PloS one* 2015;10(7):e0133442-e42. doi: 10.1371/journal.pone.0133442
- 42 95. Russell DW. UCLA Loneliness Scale (Version 3): reliability, validity, and factor structure. *J Pers*  
43 *Assess* 1996;66(1):20-40. doi: 10.1207/s15327752jpa6601\_2
- 44 96. Doring N, Bortz J. Psychometrische Einsamkeitsforschung. Deutsche Neukonstruktion der UCLA  
45 Loneliness Scale. *Diagnostica* 1993;39:224-39.
- 46 97. Thomas A, Brähler E, Strauß B. IIP-32: Entwicklung, Validierung und Normierung einer Kurzform  
47 des Inventars zur Erfassung interpersonaler Probleme. *Diagnostica* 2011;57(2):68-83.
- 48 98. Horowitz LM, Rosenberg SE, Baer BA, et al. Inventory of interpersonal problems: psychometric  
49 properties and clinical applications. *J Consult Clin Psychol* 1998;56(6): 885-92.
- 50 99. Baer RA, Smith GT, Allen KB. Assessment of mindfulness by self-report: The Kentucky inventory of  
51 mindfulness skills. *Assessment* 2004;11(3):191-206. doi: 10.1177/1073191104268029
- 52 100. Ströhle G, Nachtigall C, Michalak J, et al. Die Erfassung von Achtsamkeit als mehrdimensionales  
53 Konstrukt: Die deutsche Version des Kentucky Inventory of Mindfulness Skills (KIMS-D) *Z Klin*  
54 *Psychol Psychother* 2010;39:1-12. doi: 10.1026/1616-3443/a000001
- 55  
56  
57  
58  
59  
60

101. Terman LM, Buttenwieser P, Ferguson LW, et al. Psychological factors in marital happiness. New York: McGraw-Hill 1938.
102. Hahlweg K. Konstruktion und Validierung des Partnerschaftsfragebogens PFB. *Zeitschrift für Klinische Psychologie* 1979;8(1):17-40.
103. Spitzer RL, Kroenke K, Williams JB. Validation and utility of a self-report version of PRIME-MD: the PHQ primary care study. Primary Care Evaluation of Mental Disorders. Patient Health Questionnaire. *JAMA* 1999;282(18):1737-44.
104. Löwe B, Spitzer RL, Zipfel S, et al. Autorisierte deutsche Version des „Prime MD Patient Health Questionnaire (PHQ)“ Gesundheitsfragebogen für Patienten 2002.
105. Hendrick SS. A Generic Measure of Relationship Satisfaction. *Journal of Marriage and Family* 1988;50 (1):93-98. doi: 10.2307/352430
106. Sander J, Böcker S. Die Deutsche Form der Relationship Assessment Scale (RAS): Eine kurze Skala zur Messung der Zufriedenheit in einer Partnerschaft. *Diagnostica* 1993;39:55-62.
107. First MB, Spitzer RL, Miriam G, et al. Structured Clinical Interview for DSM-IV Axis I Disorders, Clinician Version (SCID-CV). Washington, DC: American Psychiatric Press, Inc 1996
108. Wittchen H-U, Wunderlich U, Gruschwitz S, et al. Strukturiertes Klinisches Interview für DSM-IV Achse I: Psychische Störungen. Göttingen 1997.
109. Neff KD. The development and validation of a scale to measure self-compassion. *Self and Identity* 2003;2(3):223-50. doi: 10.1080/15298860390209035
110. Hupfeld J, Ruffieux N. Validierung einer deutschen Version der Self-Compassion Scale (SCS-D). *Z Klin Psychol Psychother* 2011;40(2):115-23. doi: 10.1026/1616-3443/a000088
111. Schulz P, Schlotz W, Becker P. Trier Inventar zum chronischen Stress (TICS) Göttingen: Hogrefe 2004.

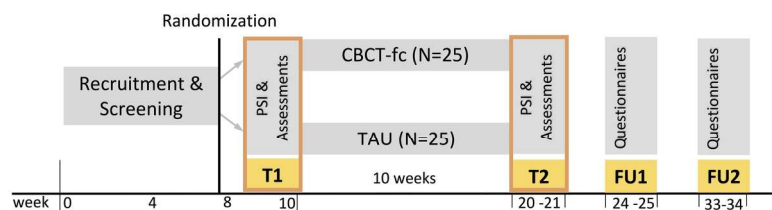

Fig. 1 Study Design.

PSI = Positive Social Interaction; TAU = Treatment as usual; CBCT®-fc = Cognitively-Based Compassion Training for Couples; T1 = measurement point 1 (baseline); T2 = measurement point 2 (post intervention); FU1/2 = follow-up 1 and 2

190x107mm (300 x 300 DPI)



1  
2  
3  
4  
5  
6  
7  
8  
9  
10  
11  
12  
13  
14  
15  
16  
17  
18  
19  
20  
21  
22  
23  
24  
25  
26  
27  
28  
29  
30  
31  
32  
33  
34  
35  
36  
37  
38  
39  
40  
41  
42  
43  
44  
45  
46  
47  
48  
49  
50  
51  
52  
53  
54  
55  
56  
57  
58  
59  
60

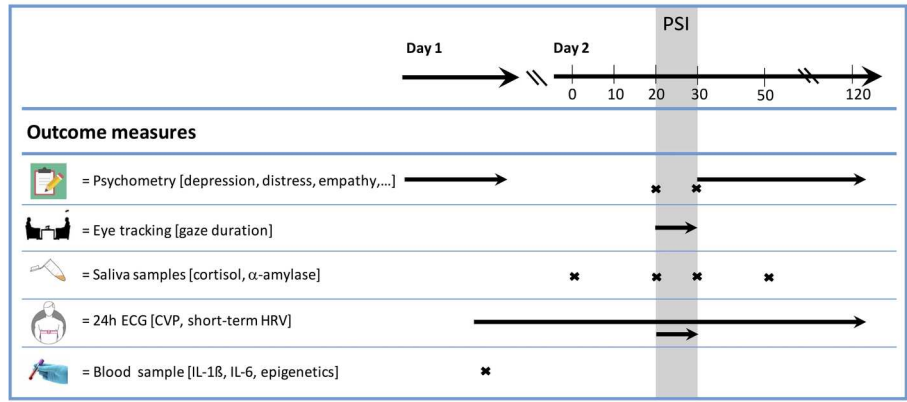

Fig. 2 Assessments.  
 PSI = Positive Social Interaction, ECG = electrocardiogram, CVP = circadian variation pattern, HRV = heart rate variability, IL = interleukin

190x107mm (300 x 300 DPI)

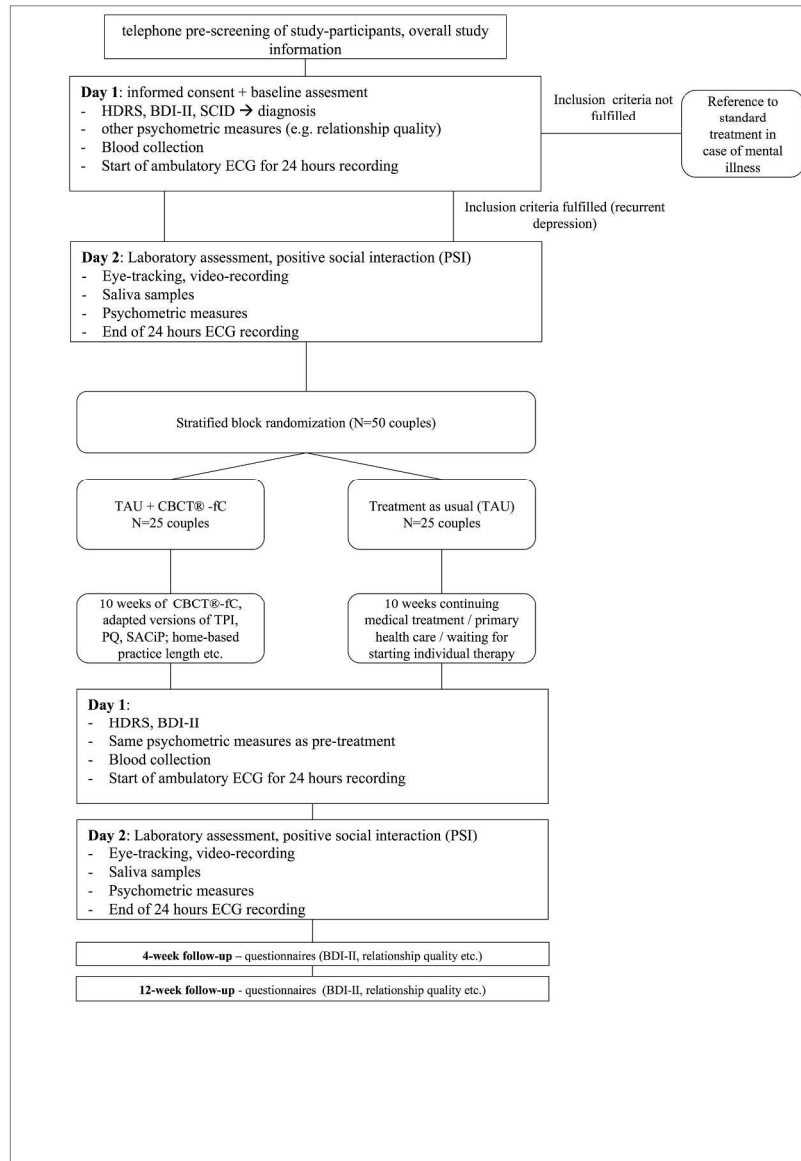

Fig. 3 Flow diagram

HDRS = Hamilton Depression Rating Scale, BDI = Beck Depression Inventory, SCID = Structured Clinical Interview for DSM, ECG = electrocardiogram, PSI = positive social interaction, CBCT®-fC = Cognitively-Based Compassion Training for Couples, TAU = Treatment as usual, TPI = Therapeutic Presence Inventory, PQ = Practice Quality, SACiP = Scale for the Multiperspective Assessment of General Change Mechanisms in Psychotherapy

275x397mm (300 x 300 DPI)

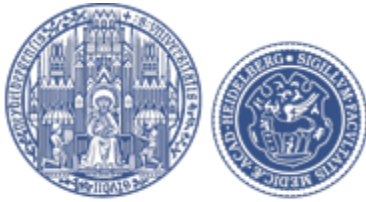

UniversitätsKlinikum Heidelberg

Institut für Medizinische Psychologie | Bergheimer Str. 20 | 69115 Heidelberg

## Einwilligungserklärung zur Studie: „Psychobiologische Marker und reales Interaktionsverhalten bei Depression: CBCT-Studie“

Version 3.0

Proband (Name, Vorname):

Geb.-Datum: \_\_\_\_\_

ID-Aufkleber:  
(Pseudonym)

Hiermit erkläre ich meine Einwilligung zur Teilnahme an dem Forschungsprojekt gemäß der vorstehenden Information. Durch meine Unterschrift bestätige ich, dass ich den Inhalt der Information gelesen und verstanden habe. Ich hatte Gelegenheit Fragen zu stellen, die mir zufriedenstellend beantwortet wurden. Ich weiß, dass meine Teilnahme freiwillig ist und ich meine Einwilligung jederzeit ohne Angabe von Gründen widerrufen und die Vernichtung meiner Blut- und Speichelproben sowie aller Daten fordern kann, ohne dass mir daraus irgendwelche Nachteile entstehen.

- Ich bin ausdrücklich damit einverstanden, dass meine Daten und Biomaterialien für den in der Informationsschrift benannten Forschungszweck verwendet werden.
- Ich stimme ausdrücklich zu, dass das Eigentum der mir entnommenen Biomaterialien an das Institut für Medizinische Psychologie des Universitätsklinikums Heidelberg übertragen wird.

Mir ist bewusst, dass ich nicht notwendigerweise einen persönlichen Vorteil aus diesem Forschungsprojekt haben werde.

Aus den mir entnommenen Körpermaterialien können wider Erwarten medizinische Erkenntnisse, sogenannte Zufallsbefunde, erlangt werden, die für die Erhaltung oder Wiederherstellung meiner eigenen Gesundheit von erheblicher Bedeutung sein können. Nachstehend können Sie entscheiden wie die Studienleitung damit umgehen soll:

- Ja, ich möchte über Zufallsbefunde meiner Untersuchung informiert werden.
- Nein, ich möchte über Zufallsbefunde meiner Untersuchung **nicht** informiert werden.

DF

### Zentrum für Psychosoziale Medizin

Klinik für Allgemeine Psychiatrie  
mit Poliklinik

Prof. Dr. Sabine Herpertz

Klinik für Psychosomatische u. Allgemeine  
Klinische Medizin

Prof. Dr. W. Herzog

Klinik für Kinder- u. Jugendpsychiatrie

Prof. Dr. F. Resch

**Institut für Medizinische Psychologie**

**Prof. Dr. B. Ditzen**

Institut für Psychosoziale Prävention

Prof. Dr. phil. Svenja Taubner

### Forschungsteam:

**Prof. Dr. Beate Ditzen**

Direktorin des Instituts für Medizinische  
Psychologie

### Projektleitung:

**Dr. Corina Aguilar-Raab, Dipl.-Psych.**

[Corina.Aguilar-Raab@med.uni-heidelberg.de](mailto:Corina.Aguilar-Raab@med.uni-heidelberg.de)

**Dr. Marc N. Jarczok, Dipl. SoWi**

[marc.jarczok@med.uni-heidelberg.de](mailto:marc.jarczok@med.uni-heidelberg.de)

Institut für Medizinische Psychologie im  
Zentrum für Psychosoziale Medizin des  
Universitätsklinikums Heidelberg

Bergheimer Straße 20  
D-69115 Heidelberg

Tel.: Dr. Aguilar-Raab & Dr. Jarczok  
06221/568135

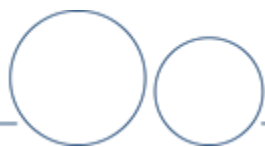

Weiterhin ist mir bewusst, dass zum Zwecke der Erhebung von weiteren Verlaufsdaten die Möglichkeit besteht, mich zu einem späteren Zeitpunkt erneut zu kontaktieren, um ergänzende Informationen und/oder Biomaterialien von mir zu erbitten.

Eine mögliche Kontaktaufnahme erfolgt über die Studienleiterin:

Prof. Dr. phil. Dipl.- Psych. Beate Ditzen  
Institut für Medizinische Psychologie im  
Zentrum für Psychosoziale Medizin (ZPM)  
Universitätsklinikum Heidelberg  
Bergheimer Str. 20, D-69115 Heidelberg  
Tel.: +49 6221 56 8150  
E-Mail: [beate.ditzen@med.uni-heidelberg.de](mailto:beate.ditzen@med.uni-heidelberg.de)

#### Datenschutz:

Mir ist bekannt, dass bei diesem Forschungsvorhaben personenbezogene Daten, insbesondere biologische Befunde und Daten, die aus Fragebögen generiert werden, über mich erhoben, gespeichert und ausgewertet werden sollen. Die Verwendung der Angaben über diese biologischen Befunde und Daten erfolgt nach gesetzlichen Bestimmungen und setzt vor der Teilnahme an dem Forschungsvorhaben folgende freiwillig abgegebene Einwilligungserklärung voraus, das heißt ohne die nachfolgende Einwilligung kann ich nicht an dem Forschungsvorhaben teilnehmen.

1. Ich erkläre mich damit einverstanden, dass im Rahmen dieses Forschungsvorhabens personenbezogene Daten, insbesondere Angaben über biologische Befunde (gewonnen aus den entnommenen Blut- und Speichelproben) sowie Daten aus Fragebogenbefragungen, über mich erhoben und in Papierform sowie auf elektronischen Datenträgern im Universitätsklinikum Heidelberg aufgezeichnet werden. Die erhobenen Daten und Blutproben dürfen pseudonymisiert (verschlüsselt) an die Abteilung „Genetische Epidemiologie in der Psychiatrie“ des Zentralinstituts für Seelische Gesundheit in Mannheim zum Zwecke der wissenschaftlichen Auswertung weitergegeben werden.
2. Ich bin darüber aufgeklärt worden, dass ich jederzeit die Teilnahme an dem Forschungsvorhaben beenden kann. Beim Widerruf meiner Einwilligung, an dem Forschungsvorhaben teilzunehmen, habe ich das Recht, die Löschung aller meiner bis dahin gespeicherten personenbezogenen Daten und die Vernichtung aller erhobenen Biomaterialien (Blut- und Speichelproben) zu verlangen.
3. Ich erkläre mich damit einverstanden, dass meine Daten und Biomaterialien nach Beendigung oder Abbruch des Forschungsvorhabens für maximal 10 Jahre aufbewahrt werden. Danach werden meine personenbezogenen Daten gelöscht, soweit nicht gesetzliche oder satzungsmäßige Aufbewahrungsfristen der Löschung entgegenstehen.

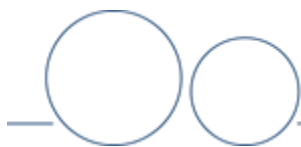

- 1  
2  
3  
4  
5  
6  
7  
8  
9  
10  
11  
12  
13  
14  
15  
16  
17  
18  
19  
20  
21  
22  
23  
24  
25  
26  
27  
28  
29  
30  
31  
32  
33  
34  
35  
36  
37  
38  
39  
40  
41  
42  
43  
44  
45  
46  
47  
48  
49  
50  
51  
52  
53  
54  
55  
56  
57  
58  
59  
60
4. Ich erkläre mich damit einverstanden, dass die erhobenen Daten nach Beendigung der Studie der nationalen und internationalen Wissenschaft in anonymisierter Form durch eine Veröffentlichung über das Forschungsdatenrepositorium der Universität Heidelberg „heiDATA“ zugänglich gemacht werden. Dies dient zusätzlich der wissenschaftlichen Qualitätssicherung im Sinne der Nachvollziehbarkeit der erbrachten Studienergebnisse. Eine Aufbewahrung der Daten bei heiDATA erfolgt **ohne** persönliche Identifikatoren (z.B. Name oder Kontaktdaten). Die auf diese Weise veröffentlichten Daten sowie auch Veröffentlichungen in wissenschaftlichen Fachartikeln, welche die Daten in anonymisierter Form verwenden, bleiben dauerhaft öffentlich verfügbar.

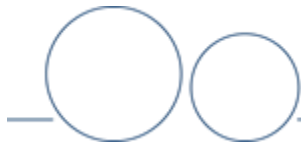

Seite 4

Eine Kopie der Probandeninformation und Einwilligungserklärung habe ich erhalten. Das Original verbleibt beim Institut für Medizinische Psychologie des Universitätsklinikums Heidelberg.

-----  
**Name des Probanden in Druckbuchstaben**

Heidelberg, den

-----  
**Ort, Datum**

**Unterschrift des Probanden**

Ich habe das Aufklärungsgespräch geführt und die Einwilligung des Probanden eingeholt.

-----  
**Name des Fachpersonals in Druckbuchstaben**

Heidelberg, den

-----  
**Ort, Datum**

**Unterschrift des Fachpersonals**

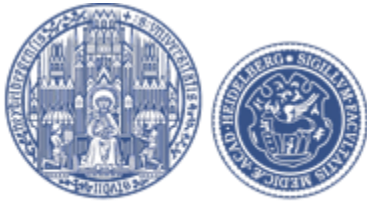

UniversitätsKlinikum Heidelberg

Institut für Medizinische Psychologie | Bergheimer Str. 20 | 69115 Heidelberg

## Informationsschrift für Frauen mit depressiver Erkrankung in Partnerschaft zur Studie: „Psychobiologische Marker und reales Interaktionsverhalten bei Depression: CBCT-Studie“

Version 3.0

Sehr geehrte Studienteilnehmerin,

herzlichen Dank für Ihr Interesse an unserer Studie mit dem Titel „*Psychobiologische Marker und reales Interaktionsverhalten: CBCT-Studie*“. Wir möchten Sie mit diesem Informationsschreiben über unsere Studie umfassend informieren.

### 1. Unsere Studie: Worum geht es und warum ist sie wichtig?

Die Depression gehört zu den am weitesten verbreiteten psychischen Störungen weltweit. Nach wie vor sind die Ursachen für eine Depression ungeklärt und wir forschen intensiv zu möglichen Behandlungsansätzen. Nachgewiesen sind bei der Depression Veränderungen von Aufmerksamkeits-, Wahrnehmungs- und Denkprozessen. Diese könnten daran beteiligt sein, dass sich Erkrankte zurückziehen und Gefühle der Unverbundenheit und Einsamkeit auftreten. Ein relativ neuer Therapieansatz bei Depressionen sind Trainings, die auf Achtsamkeit und Mitgefühl fokussieren. Da bei einer Depression häufig zentrale soziale Beziehungen wie zum Beispiel Partnerschaft oder Ehebeeinträchtigt sein können, berichten oft auch die Partner von psychischen Belastungen (z.B. Stress). Somit könnte diese neue Interventionsform zentrale soziale Beziehungen wie die eigene Partnerschaft verbessern, sowie gesundheitsförderliche Effekte durch ein verringertes Stresserleben für beide Partner entfalten.

Im Rahmen dieser Studie möchten wir in einem ersten Teil deshalb überprüfen, **welche Unterschiede** es konkret zwischen Paaren mit und ohne an Depression erkrankter Partnerin gibt.

Hierbei untersuchen wir ein kurzes, angeleitetes **positives Partnerschaftsgespräch**, wozu wir Paare zu uns ins Institut für Medizinische Psychologie einladen. Wir sind an **Verhaltensbeobachtung**, aber auch an verschiedenen **Reaktionen auf körperlicher Ebene** (z.B. Ausmaß an vorhandenen Stresshormonen), die eine psychische Belastung „messbar“ machen, interessiert.

In einem zweiten Teil geht es darum, ob ein Achtsamkeits- und Mitgefühlsbasiertes Gruppentraining für Paare (sog. CBC-Training; entwickelt an der Emory Universität in Atlanta, USA): aus dem Englischen = „Cognitively-Based Compassion Training“ – kognitiv-basiertes Mitgefühlstraining) die Symptome der Depression vermindert und die Partnerschaftsqualität sowie mögliche negative Auswirkungen der Depres-

### Zentrum für Psychosoziale Medizin

Klinik für Allgemeine Psychiatrie mit Poliklinik

Prof. Dr. Sabine Herpertz

Klinik für Psychosomatische u. Allgemeine Klinische Medizin

Prof. Dr. W. Herzog

Klinik für Kinder- u. Jugendpsychiatrie

Prof. Dr. F. Resch

**Institut für Medizinische Psychologie**  
Prof. Dr. B. Ditzen

Institut für Psychosoziale Prävention

Prof. Dr. phil. Svenja Taubner

### Forschungsteam:

**Prof. Dr. Beate Ditzen**

Direktorin des Instituts für Medizinische Psychologie

### Projektleitung:

**Dr. Corina Aguilar-Raab, Dipl.-Psych.**

[Corina.Aguilar-Raab@med.uni-heidelberg.de](mailto:Corina.Aguilar-Raab@med.uni-heidelberg.de)

**Dr. Marc N. Jarczok, Dipl. SoWi**

[marc.jarczok@med.uni-heidelberg.de](mailto:marc.jarczok@med.uni-heidelberg.de)

Institut für Medizinische Psychologie im Zentrum für Psychosoziale Medizin des UniversitätsKlinikums Heidelberg

Bergheimer Straße 20  
D-69115 Heidelberg

Tel.: Dr. Aguilar-Raab & Dr. Jarczok  
06221/568135

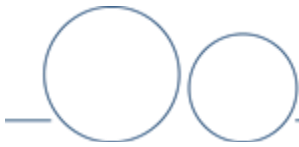

sion auf die eigene körperliche Gesundheit (beispielsweise Stressreaktion) reduziert. Hierbei werden die teilnehmenden Paare per Zufallsprinzip zwei Gruppen zugeordnet: bei der einen Hälfte erfolgt das eben beschriebene CBC-Training, bei der anderen Hälfte nicht – diese Gruppe dient als Kontroll- bzw. Vergleichsgruppe.

Die zufällige Zuteilung (sogenannte Randomisierung) ist eines der wesentlichen Verfahren zur Sicherstellung der Verallgemeinerbarkeit der Studienergebnisse, daher kann die einmal getroffene Zuteilung von der Studienleitung nicht beeinflusst werden. Die Wahrscheinlichkeit, dass Sie in die CBC-Trainingsgruppe kommen, liegt bei 50 Prozent, wobei für die Vergleichsgruppe kein Nachteil entsteht, da beispielweise die bisherige, evtl. antidepressive Behandlung weitergeführt werden kann.

## 2. Welche Daten werden in der Studie erfasst?

In dieser Studie werden Selbstberichtsdaten (erfasst über Fragebögen) und körperliche/biologische Daten („Echtzeit-Blickbewegung/Eye-Tracking“, „Stress-Hormone“, „Stress-Enzyme“, „Stress-Physiologie“, „Immun-Parameter“, „24h Puls“ und „genetische Marker“) erhoben. Die körperlichen Daten werden hierbei zusammenfassend als **Biomaterial** bezeichnet.

## 3. Wie oft werden diese Daten erhoben?

Die unten beschriebene Datenerhebung erfolgt zwei Mal und in allen Gruppen: Sowohl bei der Gruppe, die das CBC-Training erhält, als auch bei der Gruppe ohne Training: Das erste Mal vor Beginn des Trainings und das zweite Mal nach 10 Wochen, bzw. nach Abschluss des Trainings. Circa 4 und 8 Wochen nach der zweiten Datenerhebung erfolgt eine online Fragebogenbefragung, die Sie von zuhause aus durchführen können.

## 4. Welcher Zeitaufwand geht hiermit einher?

Der Zeitaufwand gliedert sich wie folgt:

1. Telefonischer Erstkontakt (5-15 Min.) (bereits erfolgt).
2. Sie erhalten eine weitere Einladung in das Institut für Medizinische Psychologie. Im Rahmen des Labortags 1 findet ein vorbereitendes Gespräch, eine Screening-Erhebung und ein diagnostisches Interview sowie die Blutabnahme statt (heutiger Termin). Danach erhalten Sie und Ihr Partner einen Brustgurt, der Ihren Puls für ca. 24 Stunden im Alltag misst. Mit diesem werden Sie nach Hause entlassen (ca. 2,5 Stunden).
3. Wir bitten Sie, zuhause einige Fragebögen auszufüllen, die wir Ihnen nach dem 1. Tag mitgeben (ca. 30 Minuten).



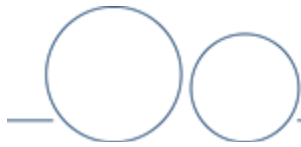

- 1  
2  
3  
4  
5  
6  
7  
8  
9  
10  
11  
12  
13  
14  
15  
16  
17  
18  
19  
20  
21  
22  
23  
24  
25
4. Labortag 2 am Institut für Medizinische Psychologie (zwischen 15 und 20 Uhr): Nach einer kurzen Vorbereitung erfolgt eine angeleitete 10-minütige positive soziale Interaktion mit Ihrem Partner. Während dieser Interaktion werden Ihre Blickbewegungen und weiterhin der Puls (Brustgurt) gemessen. Vor und nach der Interaktion werden insgesamt 4 Speichelproben entnommen (siehe Punkt 6 für genauere Angaben: **„Wie werden die Reaktionen auf körperlicher Ebene gemessen und warum? - Messungen der Blickbewegungen und des Pulses sowie die Entnahme von Biomaterialien Blut- und Speichelproben“**). Danach füllen Sie und Ihr Partner verschiedene Fragebögen aus. Im Anschluss werden Sie und Ihr Partner zu einem abschließendes Paargespräch gebeten. Die Gesamtdauer beträgt insgesamt ca. 160 Minuten.

26  
27  
28  
29  
30  
31  
32  
33  
34  
35  
36  
37  
38  
39

Für diejenigen Paare, die auch an dem CBC-Training teilnehmen, erfolgen einmal wöchentliche, zweistündige Gruppen-Sitzungen, die ebenfalls zur Qualitätssicherung per Video aufgenommen werden. Am Ende jeder Sitzung erfolgt eine kurze Fragebogenbefragung (5 Min.). In den zehn Wochen des CBC-Trainings werden Übungen und teilweise Hausaufgaben bzw. Partnerübungen aufgegeben (jeweils 8-12 Min.). Sie werden vier Mal pro Woche morgens per Kurznachricht (sog. SMS) über Ihr Smartphone daran erinnert und zu Ihrer Übung und Ihrer Befindlichkeit befragt. In der SMS befindet sich dazu ein Link. Wenn Sie auf diesen Link klicken, gelangen Sie zu einer kurzen, internetbasierten Abfrage, welche die Dauer und Intensität sowie ihr aktuelles Befinden erfragt (1-3 Min.). Das Beantworten dieser Fragen können Sie überall dort umsetzen, wo Sie ein internetfähiges Gerät nutzen können (z.B. Ihr Smartphone, Ihren Laptop, Ihr Tablet-PC etc.).

40  
41  
42  
43  
44  
45  
46  
47  
48

Die Paare, die nicht am CBC-Training teilnehmen, werden nur einmal wöchentlich per SMS zu ihrer aktuellen Befindlichkeit befragt (5 Min.). Die Termine der einzelnen Untersuchungsschritte und des CBC-Trainings werden mit Ihnen einzeln abgestimmt – hierzu werden wir Sie zeitnah persönlich kontaktieren. Bei Rückfragen können Sie sich jederzeit an die Projektleiter (Dr. Corina Aguilar-Raab, Dr. Marc N. Jarczok) wenden. Die entsprechenden Kontaktinformationen der Projektleitung entnehmen Sie bitte der ersten Seite dieser Informationsschrift.

49  
50  
51  
52

**5. Wie werden die Reaktionen auf körperlicher Ebene gemessen und warum? - Messungen der Blickbewegungen und des Pulses sowie Entnahme von Biomaterialien Blut- und Speichelproben**

53  
54  
55  
56  
57  
58  
59  
60

Der Nachweis biologischer Marker ist wichtig, da hierdurch deutlich wird, in welchem Maße Ihr Körper während einer positiven Interaktion mit Ihrem Partner unter Stress steht. Diese normale, körperliche Reaktion kann vom persönlichen Belastungsempfinden deutlich abweichen. Die akute Aktivierung der biologischen Stresssysteme ist eine normale Reaktion und birgt keinerlei Gefahren für Ihre Gesundheit.

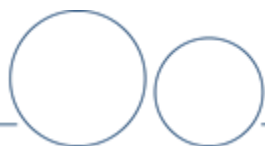

Sie und Ihr Partner liefern uns durch Ihre Mitarbeit dabei wichtige Daten, um ein eventuell verändertes Verhalten zwischen Ihnen beiden im Vergleich zu weniger psychisch belasteten Paaren zu erkennen. Des Weiteren werden die Werte Ihrer Biomarker vor und nach 10 Wochen bzw. nach dem CBC-Training verglichen, womit das Potential des Trainings zur objektiven Verbesserung partnerschaftlicher Interaktion und ihrer individuellen psychischen Belastung gemessen wird.

Mögliche pathologische Zufallsbefunde, also Ergebnisse der Untersuchungen die für Sie gesundheitlich von erheblicher Bedeutung sind und/oder einer weiteren Untersuchung bedürfen, teilt Ihnen die Studienleitung direkt nach der Auswertung mit, sofern Sie dies im Vorfeld wünschen. Unter dem Punkt „Zufallsbefund“ finden Sie für jede Untersuchung beschrieben, inwieweit dies möglich ist.

#### **24- Stunden Ein-Kanal-EKG**

Am Labortag 1 (siehe Seite 2) erhalten Sie von uns im Institut für Medizinische Psychologie einen Brustgurt, wie er auch im Sportbereich eingesetzt wird, den Sie direkt anlegen und für ca. 24 Stunden tragen. Die unkomplizierte Handhabung wird Ihnen vor Ort erklärt. Dieser Gurt schränkt den Alltag, den Sie so fortführen sollten wie immer, kaum ein. Die Auswertung erfolgt nach der Gurtrückgabe im Institut für Medizinische Psychologie.

**Warum?** Die Langzeitmessung der Herzfrequenz („Puls“) über 24 Stunden gibt uns Auskunft über Erholung und Entspannung. So können wir die Balance zwischen Belastung und Ruhe der biologischen Systeme Ihres Körpers untersuchen.

**Mögliche Zufallsbefunde** können hierbei nur in geringem Ausmaß festgestellt werden, da wir keine Auswertung des EKGs, sondern allein die Abstände der Herzschläge, also die Herzfrequenz (Schläge des Herzens pro Minute) auswerten. D.h. einzig eine im Durchschnitt dauerhaft deutlich erhöhte Herzfrequenz würden wir Ihnen mitteilen, sofern Sie dies wünschen.

#### **Speichelproben**

Am Labortag 2 werden wir Sie bitten, 20 Min. vor, direkt vor, direkt nach, und 20-30 Min. nach der positiven sozialen Interaktion eine geringe Menge Speichel abzugeben (pro Entnahme ca. 1 ml, insgesamt 4 mal). Für diese Speichelproben stellen wir Ihnen nummerierte und sortierte, einfach zu handhabende Speichelröhrchen zur Verfügung und erklären die Benutzung vor Ort.

**Warum?** Psychische Belastung führt zu einer gesteigerten Aktivierung der beiden Hauptstresssysteme im Körper, dem sympathischen Nervensystem (SNS) und der Hypothalamus-Hypophysen-Nebennierenrindenachse (HHNA). Aus 4 Speichelproben pro Proband erheben wir den Verlauf der Parameter dieser Stresssysteme: **Cortisol** (HHNA), **Alpha Amylase** (indirekt SNS) und **Immunparameter Interleukin IL-1 $\beta$**  und **IL-6** (indirekt mit Stress verbunden).

#### **Mögliche Zufallsbefunde:**

Interleukine (IL1- $\beta$  und IL6 aus Speichel): Keine bekannt.

Alpha-Amylase: Keine bekannt.

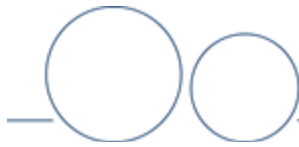

Speichel-Cortisol: Dauerhaft erhöhtes Cortisol im Speichel kann auf ein Cushing-Syndrom bzw. Morbus Cushing hindeuten.

### Blutproben

An Labortag 1 werden wir Ihnen mit Ihrer Erlaubnis insgesamt ca. 25ml Blut abnehmen (das entspricht etwas mehr als 2 Esslöffeln). Für die Blutentnahme ist es nicht erforderlich, dass Sie nüchtern sind.

**Warum?** Bei Stressreaktionen wird im Gehirn Serotonin freigesetzt. Dies kann jedoch nicht direkt gemessen werden. Wir erfassen die Einflüsse des Stresses auf das Gehirn deshalb indirekt über die Aktivierung des **Serotonin-Transporter-Gens (SLC6A4)**, welches im Blut nachgewiesen werden kann. Zusätzlich untersuchen wir die **genetische Aktivierung des Oxytocinrezeptors (OXTR)**, der mit Stresserleben und Bindungsverhalten in Zusammenhang steht. Beides wird über sogenannte „epigenetische“ Untersuchungen bestimmt. Hierbei wird explizit **nicht** ihr Genom entschlüsselt, sondern gemessen, in wie weit die zwei oben genannten Bereiche des Erbguts von den Körperzellen *abgelesen* werden. Folglich können auch keine Erbkrankheiten o.ä. aufgedeckt werden.

Ebenfalls werden **CRP** (C-reaktives Protein; indirekt mit Stress verbunden) und nochmals Interleukin **IL1- $\beta$  und IL-6** im Blut gemessen. Dies ist das etablierte Verfahren zur Bestimmung der Parameter bei Stress. Mit Hilfe der zusätzlichen, oben beschriebenen Bestimmung der Interleukine im Speichel möchten wir prüfen, ob sich die Blut- und Speichelwerte im Verlauf ähnlich verhalten (steigen und fallen gemeinsam), so dass direkte Schlüsse von Speichel-Interleukine auf Blut-Interleukine gezogen werden können. Falls dies der Fall wäre, könnte bei zukünftigen Untersuchungen (z.B. wissenschaftlichen Studien zum Thema Depression) bei mehrfach nachgewiesenem Zusammenhang auf eine Blutentnahme verzichtet werden. Eine Speichelentnahme würde dann ausreichen.

### Mögliche Zufallsbefunde:

Entzündungsmarker IL-1 $\beta$ , IL-6, CRP: Erhöhte Werte deuten auf eine mögliche akute oder chronische Entzündung hin. Bei Diabetes Mellitus sind auch ohne zusätzlichen psychischen Stress CRP, IL1- $\beta$  und IL-6 erhöht. Aus diesem Grund wird zum Ausschluss eines unbekanntes Diabetes Mellitus **HbA1c**, ein Langzeitmarker des Blutzuckers, bestimmt.

HbA1c: Leicht erhöhte Werte deuten auf einen Prä-Diabetes, erhöhte Werte deuten auf einen Diabetes Mellitus Typ II hin.

Epigenetische Marker (SLC6A4; OXTR): Keine bekannt.

Hinweis: Es wird kein umfassendes Blutbild erstellt. Das heißt, diese zu Forschungszwecken durchgeführte Untersuchung ersetzt nicht eine Blutentnahme bei einem Arzt.

Speicheluntersuchung und Herzfrequenzprofilauswertung sowie die Bestimmung das Interleukin 1 $\beta$  im Blut erfolgen im Institut für Medizinische Psychologie. CRP, HbA1c und Interleukin 6 werden im Zentrallabor des Klinikums bestimmt. Am ZI



Mannheim wird die epigenetische Auswertung von SLC6A4 und OXTR-Gen durchgeführt.

### **Eye Tracking und Videoaufzeichnung**

Beides findet am Labortag 2 während der zehnmütigen positiven sozialen Interaktion statt. Für diese Aufnahmen stehen entsprechende Geräte zur Erfassung der Blickbewegung, sogenannte Eye-Tracker, auf einem Tisch zwischen Ihnen und Ihrem Partner. Außerdem zeichnen zwei Kameras den Kopf und Oberkörper des jeweiligen Gegenübers auf (sogenannte Szenenkameras), ohne die das Eye-Tracking nicht funktionieren würde. Es kommen **keine** Geräte zum Einsatz, die am Kopf o.ä. getragen werden. Sollten Sie eine Brille oder Kontaktlinsen tragen, bitten wir Sie, diese zur Untersuchung mitzubringen. Sollten Sie beides besitzen, bringen Sie bitte Ihre Kontaktlinsen mit, da diese beim Eye-Tracking leichter auszuwertende Ergebnisse liefern.

**Warum?** Der Eye-Tracker ist ein Gerät, das aufzeichnet wohin Sie blicken. In mehreren Studien wurde bereits gezeigt, dass depressiv erkrankte Menschen im Vergleich zu nicht depressiv erkrankten Menschen ein verändertes Blickverhalten aufweisen. Bis jetzt wurde dies jedoch noch nie in einer echten Gesprächssituation zweier Partner systematisch untersucht.

Wir erhoffen uns hieraus neue Erkenntnisse zu erlangen zum Beispiel zur Veränderung der Aufmerksamkeitslenkung. Die Aufnahmen der Szenenkameras erlauben außerdem eine Untersuchung der Kommunikationsmuster. Unser Ziel ist es, Unterschiede im Blickverhalten aufdecken zu können.

**Zufallsbefunde:** Keine bekannt.

## **6. Was ist das CBC-Training?**

Wenn Sie am CBC-Training teilnehmen, werden Sie Methoden erlernen, die sich auf ein positives Miteinander in der Partnerschaft beziehen. Als nicht-religiöse (säkulare) Methode bietet das Training verschiedene Wege an, Mitgefühl gegenüber einem umfassenden Kreis an Menschen zu kultivieren und auszudehnen. Im Vordergrund stehen hier jedoch der Partner und die partnerschaftliche Beziehung.

Die darin beinhalteten Praktiken unterstützen die Entwicklung einer Vielzahl von positiven Qualitäten, Erfahrungen und Verhaltensweisen, wie z.B. Freundlichkeit, Dankbarkeit, als auch Empathie und Mitgefühl. Die fundamentale Grundannahme ist, dass Mitgefühl als eine Persönlichkeitseigenschaft entwickelt und erweitert werden kann. Diese Annahme wird durch aktuelle Forschungsergebnisse unterstützt.

Dieses CBC-Training kombiniert gedankliche Komponenten und Übungen (u.a. Istzustandsanalyse, Achtsamkeits- und Mitgefühlsmeditationen) und solche, die die Partnerschaft und das soziale Miteinander betreffen (z.B. Empathietraining). In standardisierten Labortests wurde bereits gezeigt, dass ein solches Training die psychische und körperliche Stress- und Immunantwort bei gesunden Individuen verbessert. Ob sich das Training auch bei Menschen mit Depressionen entspre-



chend positiv auswirkt, und ob es einen positiven Einfluss auf die partnerschaftliche Interaktion hat, ist bisher noch nicht erforscht.

Die Teilnahme an einem CBC-Training über 10 Wochen würde nach aktuellem Stand etwa 300€ pro Person kosten. Für Sie und Ihren Partner ist bei entsprechender Zufallslosung dieses Training jedoch komplett **kostenfrei**. Für die Teilnahme ist eine ärztliche Überweisung an unsere Institutsambulanz notwendig.

## 7. Datenschutz und Aufbewahrung

Die von Ihnen zur Verfügung gestellten Daten und Biomaterialien werden ausschließlich für die wissenschaftliche Forschung verwendet und streng vertraulich behandelt. Ihnen wird bei der ersten Registrierung als Studienteilnehmer eine pseudonymisierte, verschlüsselte Identifikationsnummer (ID-Nummer, aufsteigend) zugeordnet. Dies ist ein Code, der auf Ihren ausgefüllten Fragebögen, Speichelproben etc. steht und keinerlei Informationen über Sie als Person beinhaltet. Alle Materialien, die gesammelt werden, werden mit dieser Nummer versehen. Nur die in Papierform vorliegende Einwilligungserklärung wird sowohl den Namen, als auch diese ID-Nummer enthalten und separat von allen Daten 2-fach verschlossen aufbewahrt werden. Es werden keine Daten mit dem Namen, sondern nur mit Ihrer ID-Nummer analysiert und es gibt außer über die Einwilligungserklärung keinen Weg, den Namen mit der ID-Nummer zu verbinden. Alle psychologischen und körperlichen Daten werden ausschließlich über ID-Nummern kenntlich gemacht. Keine Publikation dieses Projekts wird Ihren Namen preisgeben. Darüber hinaus werden die Ergebnisse sämtlicher Datenanalysen getrennt von Ihren personenbezogenen Daten gespeichert und können nicht ohne Mitwirkung der Projekt- oder Studienleitung Ihrer Person zugeordnet werden.

Diese Studie wird überwiegend aus öffentlichen Mitteln (z.B. der Deutschen Forschungsgemeinschaft DFG) finanziert. In Zukunft ergeben sich möglicherweise neue wissenschaftliche Fragestellungen, die im Rahmen des oben genannten Forschungsbereiches mithilfe der bereits erhobenen Daten oder Biomaterialien beantwortet werden können. Eine Veröffentlichung der Daten kann folglich bei der Beantwortung dieser neuen Fragestellungen helfen, wodurch vergleichbare Daten nicht nochmals erhoben werden müssten und öffentliche Mittel dadurch effizienter genutzt werden könnten.

Die erhobenen Daten werden dazu nach Beendigung der Studie der nationalen und internationalen Wissenschaft in anonymisierter Form durch eine Veröffentlichung über das Forschungsdatenrepositorium der Universität Heidelberg „heiDATA“ zugänglich gemacht. Dies dient zusätzlich der wissenschaftlichen Qualitätssicherung im Sinne der Nachvollziehbarkeit der erbrachten Studienergebnisse. Eine Aufbewahrung der Daten bei heiDATA erfolgt **ohne** persönliche Identifikatoren (z.B. Name oder Kontaktdaten).



Die auf diese Weise veröffentlichten Daten sowie auch Veröffentlichungen in wissenschaftlichen Fachartikeln, welche die Daten in anonymisierter Form verwenden, bleiben dauerhaft öffentlich verfügbar.

Die Daten, Biomaterialien und ausgefüllten Fragebögen werden Eigentum des Instituts für Medizinische Psychologie des Universitätsklinikums Heidelberg. Die Speichel- und Blutproben werden dort aufbewahrt, oder mit Ihrer ID-Nummer verschlüsselt auch an andere Labore verschickt, welche mit diesen Proben Analysen durchführen. Ein Teil der Blutproben wird vom Zentralinstitut für Seelische Gesundheit (Abteilung Genetische Epidemiologie in der Psychiatrie des Zentralinstituts für Seelische Gesundheit) in Mannheim aufbewahrt, das Ihre Blutproben mit einer anderen, separat erzeugten ID-Nummer verschlüsselt zur Analyse des genetischen Materials erhält. Alle in dieser Studie erhobenen Biomaterialien werden befristet auf maximal 10 Jahre nach Beendigung der Studie aufbewahrt. Falls in Zukunft eine wesentlich veränderte wissenschaftliche Fragestellung mithilfe Ihrer Probe untersucht werden soll, wird zuvor eine Stellungnahme der zuständigen Ethikkommission eingeholt.

## 8. Risiken und Nutzen der Teilnahme

### Risiken:

Mit dem Erheben der Fragebogendaten, der Videoaufnahmen, der Aufnahmen der Blickbewegungen, der Langzeitmessungen des Pulses und der Entnahme der Speichelproben sind keinerlei Risiken verbunden.

Mit den Blutentnahmen bestehen die Risiken, die mit einer normalen Blutentnahme verbunden sind. Die Entnahme einer Blutprobe ist in der Regel nur mit einem sehr geringen Risiko verbunden. An der Einstichstelle kann es zu leichten Schmerzen kommen oder es kann ein Bluterguss (blauer Fleck) entstehen, der evtl. einige Tage sichtbar ist. In äußerst seltenen Fällen kann auch die Bildung eines Blutgerinnsels (Thrombose), eine örtlich begrenzte Entzündung oder eine Infektion an der Einstichstelle auftreten oder es kann zu dauerhaften Schädigungen von Blutgefäßen oder Nerven kommen. Die Blutentnahmen werden von einem dazu befähigten und qualifizierten Fachpersonal (i.d.R. Arzt) durchgeführt.

Die Zuordnung zu Behandlungs- bzw. Kontrollgruppe erfolgt über ein Zufallsverfahren (sog. Randomisierung), worauf wir keinen Einfluss haben. Diejenigen, die der Kontrollgruppe zugeordnet werden, erhalten von unserer Seite zunächst keine Intervention. Die übliche Wartezeit auf einen individuellen Psychotherapieplatz für die an Depression Erkrankten kann durch eine reguläre allgemeinärztliche bzw. pharmakologische antidepressive Behandlung aufgenommen bzw. weitergeführt werden.

Für diejenigen Paare, die an dem CBC-Training teilnehmen, sind keine besonderen Risiken zu erwarten. Bisher sind keine unerwünschten Wirkungen in Verbindung mit dem CBC-Training wissenschaftlich erfasst worden. Es sind keine körperlichen



oder psychischen Gefahren zu erwarten. Durch die potenziell emotionalen Erfahrungen während der Trainingssitzungen kann es zu psychischen Reaktionen kommen, z.B. Stimmungsschwankungen. Diese Reaktionen werden in den Sitzungen jedoch berücksichtigt und als wichtige Erlebnisse in das Geschehen des Gruppentrainings einbezogen. Alle Gruppentrainings werden von Psychologen bzw. Psychotherapeuten und zusätzlich in CBCT qualifizierten Trainern durchgeführt, sowie begleitend von erfahrenen Psychotherapeuten supervidiert.

#### **Nutzen:**

Das hier durchgeführte Forschungsvorhaben zielt auf eine Verbesserung unseres Verständnisses für die Entstehung depressiver Störungen sowie deren Therapie durch psychologische Interventionen ab.

Für diejenigen, die an einem für Sie kostenlosen CBC-Training teilnehmen werden, liegt der persönliche Nutzen darin, dass Sie Veränderungsimpulse im Umgang mit und zur Bewältigung der depressiven Störung und vor allem des partnerschaftlichen Umgangs miteinander erhalten können. Beispielsweise könnten Sie im Verlauf des Trainings erleben, wie Sie mit einem positiveren Blick oder Gefühl Ihrem Partner begegnen können. Sie können Impulse für neue Verhaltensweisen erhalten und erfahren, wie es sich anfühlt, wenn Sie eine alternative Haltung zu Ihren Problemen einnehmen.

Nach Ende der Studie werden Ihnen die Gesamtergebnisse der Studie mitgeteilt. Für Ihre vollständige Teilnahme an der Studie erhält **jedes Paar** insgesamt eine Aufwandsentschädigung in Höhe von **200€, also 50€ pro Person pro Messzeitpunkt**, unbar auf ein anzugebendes Konto.

Nach vollständiger Studienteilnahme haben Sie die Möglichkeit als Dankeschön an dem gruppenbasierten Mitgefühlstraining für Paare (CBC-Training) teilzunehmen. Die Kosten hierfür werden vom Institut übernommen (circa 300€ pro Person).

### **9. Freiwilligkeit der Teilnahme**

Die Erhebung, Verarbeitung und Nutzung der Daten im Rahmen des Projektes erfolgt auf Basis der Rechtsgrundlage der freiwilligen und informierten Einwilligung der Teilnehmer (gemäß §§ 4, 4a BDSG). Sie nehmen an dieser Studie freiwillig teil. Sie können Ihre Teilnahme jederzeit auch ohne Angabe von Gründen abbrechen; dies hat keinerlei negative Konsequenzen für Ihre Kursteilnahme oder Ihre Gesundheitsversorgung. Die Zuteilung zur Trainings- oder Kontrollgruppe erfolgt über eine Zufallsauswahl, so dass wir an dieser Stelle keine persönlichen Präferenzen berücksichtigen können.

Die Untersuchungen werden nur dann durchgeführt, wenn Sie dazu freiwillig und schriftlich Ihre Einwilligung erklären.



## 10. Widerrufsrecht

Sie können Ihre Einwilligung zur Verwendung Ihrer Daten und Biomaterialien jederzeit ohne Angabe von Gründen und ohne nachteilige Folgen für Sie widerrufen. Im Falle eines Widerrufs können Sie entscheiden, ob Ihre Biomaterialien vernichtet und die dazu gehörenden Daten gelöscht werden sollen oder ob Sie in anonymisierter Form für weitere Forschungsvorhaben verwendet werden dürfen. Dies gilt auch dann, wenn die verschlüsselten Daten und Blutproben zur wissenschaftlichen Analyse verschlüsselt an das ZI Mannheim weitergegeben wurden. Bereits erhobene Daten verbleiben auch nach Vernichtung des Biomaterials bzw. des Fragebogens in der Studie, soweit der Personenbezug nicht mehr besteht.

### Wenden Sie sich für einen Widerruf bitte an die zuständige Studienleitung:

Prof. Dr. phil. Dipl.-Psych. Beate Ditzen  
Institut für Medizinische Psychologie im  
Zentrum für Psychosoziale Medizin (ZPM)  
Universitätsklinikum Heidelberg  
Bergheimer Str. 20, D-69115 Heidelberg  
Tel.: +49 6221 56 8150  
E-Mail: beate.ditzen@med.uni-heidelberg.de

## 11. Erneute Kontaktaufnahme

Es besteht die Möglichkeit der Kontaktaufnahme durch die Studienleitung, wenn die Ihnen entnommenen Biomaterialien wider Erwarten Informationen enthalten, die für die Erhaltung oder Wiederherstellung Ihrer Gesundheit von erheblicher Bedeutung sind. Die Kontaktaufnahme wird durch die Studienleitung oder durch eine durch die Studienleitung beauftragte Person telefonisch, schriftlich oder per E-Mail erfolgen.

## 12. Versicherungsschutz

Für die Planung und Durchführung der Studie besteht ein Versicherungsschutz für Probanden im Rahmen der Betriebs-Haftpflichtversicherung des Universitätsklinikums Heidelberg. Der Versicherungsschutz erstreckt sich auf die gesetzliche Haftpflicht des Universitätsklinikums sowie auf die persönliche gesetzliche Haftpflicht aller im dienstlichen Auftrag für das Universitätsklinikum an der Studie mitwirkenden Mitarbeiter (Studienleiter, sonstiges Personal), beispielsweise für Schäden durch die Entnahme von Blutproben (Betriebs-/Umwelt-Haftpflicht-, Umweltschadens-Versicherung: Nr. 39327978 01116. Versicherer: HDI-Gerling Industrie Versicherung AG, HDI-Platz 1, 30659 Hannover, Telefon: +49 511 645-0, Telefax: +49 511 645-4545, E-Mail: info@hdi-gerling.de).





### 13. Weitere Informationen

Sollten Sie noch weitere Fragen haben, wenden Sie sich bitte an Ihre Studienleitung (die entsprechenden Kontaktinformationen finden Sie auf Seite 1 dieser Informationsschrift). Stellen Sie alle Fragen, die Ihnen wichtig erscheinen und lassen Sie sich ausreichend Zeit für Ihre Entscheidung zur Teilnahme an dieser wissenschaftlichen Untersuchung.

Mit freundlichen Grüßen

A handwritten signature in blue ink that reads "C. Aguilar-Raab".

Dr. Corina Aguilar-Raab und Dr. Marc Jarczok  
(Projektleitung)

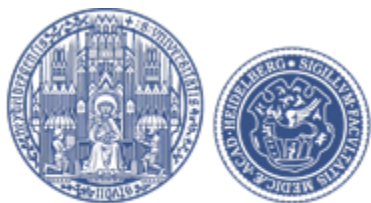

UniversitätsKlinikum Heidelberg

Institut für Medizinische Psychologie | Bergheimer Str. 20 | 69115 Heidelberg

## Informationsschrift für Männer in Partnerschaft mit an Depression erkrankter Partnerin zur Studie: „Psychobiologische Marker und reales Interaktionsverhalten bei Depression: CBCT-Studie“

Version 3.0

Sehr geehrter Studienteilnehmer,

herzlichen Dank für Ihr Interesse an unserer Studie mit dem Titel „*Psychobiologische Marker und reales Interaktionsverhalten: CBCT-Studie*“. Wir möchten Sie mit diesem Informationsschreiben über unsere Studie umfassend informieren.

### 1. Unsere Studie: Worum geht es und warum ist sie wichtig?

Die Depression gehört zu den am weitesten verbreiteten psychischen Störungen weltweit. Nach wie vor sind die Ursachen für eine Depression ungeklärt und wir forschen intensiv zu möglichen Behandlungsansätzen. Nachgewiesen sind bei der Depression Veränderungen von Aufmerksamkeits-, Wahrnehmungs- und Denkprozessen. Diese könnten daran beteiligt sein, dass sich Erkrankte zurückziehen und Gefühle der Unverbundenheit und Einsamkeit auftreten. Ein relativ neuer Therapieansatz bei Depressionen sind Trainings, die auf Achtsamkeit und Mitgefühl fokussieren. Da bei einer Depression häufig zentrale soziale Beziehungen wie zum Beispiel Partnerschaft oder Ehe beeinträchtigt sein können, berichten oft auch die Partner von psychischen Belastungen (z.B. Stress). Somit könnte diese neue Interventionsform zentrale soziale Beziehungen und die eigene Partnerschaft verbessern, sowie gesundheitsförderliche Effekte durch ein verringertes Stresserleben für beide Partner entfalten.

Im Rahmen dieser Studie möchten wir in einem ersten Teil deshalb überprüfen, **welche Unterschiede** es konkret zwischen Paaren mit und ohne an Depression erkrankter Partnerin gibt.

Hierbei untersuchen wir ein kurzes, angeleitetes **positives Partnerschaftsgespräch**, wozu wir Paare zu uns ins Institut für Medizinische Psychologie einladen. Wir sind an **Verhaltensbeobachtung**, aber auch an verschiedenen **Reaktionen auf körperlicher Ebene** (z.B. Ausmaß an vorhandenen Stresshormonen), die eine psychische Belastung „messbar“ machen, interessiert.

In einem zweiten Teil geht es darum, ob ein Achtsamkeits- und Mitgefühlsbasiertes Gruppentraining für Paare (sog. CBC-Training entwickelt an der Emory Universität in Atlanta, USA): aus dem Englischen = „Cognitively-Based Compassion Training“ –

### Zentrum für Psychosoziale Medizin

Klinik für Allgemeine Psychiatrie  
mit Poliklinik

Prof. Dr. Sabine Herpertz

Klinik für Psychosomatische u. Allgemeine  
Klinische Medizin

Prof. Dr. W. Herzog

Klinik für Kinder- u. Jugendpsychiatrie

Prof. Dr. F. Resch

**Institut für Medizinische Psychologie**

Prof. Dr. B. Ditzen

**Institut für Psychosoziale Prävention**

Prof. Dr. phil. Svenja Taubner

### Forschungsteam:

**Prof. Dr. Beate Ditzen**

Direktorin des Instituts für Medizinische  
Psychologie

### Projektleitung:

**Dr. Corina Aguilar-Raab, Dipl.-Psych.**

[Corina.Aguilar-Raab@med.uni-heidelberg.de](mailto:Corina.Aguilar-Raab@med.uni-heidelberg.de)

**Dr. Marc N. Jarczok, Dipl. SoWi**

[marc.jarczok@med.uni-heidelberg.de](mailto:marc.jarczok@med.uni-heidelberg.de)

Institut für Medizinische Psychologie im  
Zentrum für Psychosoziale Medizin des  
UniversitätsKlinikums Heidelberg

Bergheimer Straße 20  
D-69115 Heidelberg

Tel.: Dr. Aguilar-Raab & Dr. Jarczok  
06221/568135

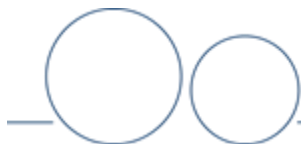

kognitiv-basiertes Mitgefühlstraining) die Belastung des Partners und die Symptome der Depression vermindert sowie die Partnerschaftsqualität sowie mögliche negative Auswirkungen der Depression auf die eigene körperliche Gesundheit (beispielsweise Stressreaktion) reduziert. Hierbei werden die teilnehmenden Paare per Zufallsprinzip zwei Gruppen zugeordnet: bei der einen Hälfte erfolgt das eben beschriebene CBC-Training, bei der anderen Hälfte nicht – diese Gruppe dient als Kontroll- bzw. Vergleichsgruppe.

Die zufällige Zuteilung (sogenannte Randomisierung) ist eines der wesentlichen Verfahren zur Sicherstellung der Verallgemeinerbarkeit der Studienergebnisse, daher kann die einmal getroffene Zuteilung von der Studienleitung nicht beeinflusst werden. Die Wahrscheinlichkeit, dass Sie in die CBC-Trainingsgruppe kommen liegt bei 50 Prozent.

## 2. Welche Daten werden in der Studie erfasst?

In dieser Studie werden Selbstberichtsdaten (erfasst über Fragebögen) und körperliche/biologische Daten („Echtzeit-Blickbewegung/Eye-Tracking“, „Stress-Hormone“, „Stress-Enzyme“, „Stress-Physiologie“, „Immun-Parameter“, „24h Puls“ und „genetische Marker“) erhoben. Die körperlichen Daten werden hierbei zusammenfassend als **Biomaterial** bezeichnet.

## 3. Wie oft werden diese Daten erhoben?

Die unten beschriebene Datenerhebung erfolgt zwei Mal und in allen Gruppen: Sowohl bei der Gruppe, die das CBC-Training erhält, als auch bei der Gruppe ohne Training: Das erste Mal vor Beginn des Trainings und das zweite Mal nach 10 Wochen, bzw. nach Abschluss des Trainings. Circa 4 und 8 Wochen nach der zweiten Datenerhebung erfolgt eine online Fragebogenbefragung, die Sie von zuhause aus durchführen können.

## 4. Welcher Zeitaufwand geht hiermit einher?

Der Zeitaufwand gliedert sich wie folgt:

1. Telefonischer Erstkontakt (5-15 Min.) (bereits erfolgt).
2. Sie erhalten eine weitere Einladung in das Institut für Medizinische Psychologie. Im Rahmen des Labortag 1 findet ein vorbereitendes Gespräch, eine Screening-Erhebung und ein diagnostisches Interview sowie die Blutabnahme statt (heutiger Termin). Danach erhalten Sie und Ihre Partnerin einen Brustgurt der Ihren Puls für ca. 24 Stunden im Alltag misst. Mit diesem werden Sie nach Hause entlassen (ca. 2,5 Stunden).



3. Wir bitten Sie, zuhause einige Fragebögen auszufüllen, die wir Ihnen nach dem 1. Tag mitgeben (ca. 30 Minuten).
  
4. Labortag 2 am Institut für Medizinische Psychologie (zw. 15 und 20 Uhr): Nach einer kurzen Vorbereitung erfolgt eine angeleitete 10-minütige positive soziale Interaktion mit Ihrer Partnerin. Während dieser Interaktion werden Ihre Blickbewegungen und weiterhin der Puls (Brustgurt) gemessen. Vor und nach der Interaktion werden insgesamt 4 Speichelproben entnommen (siehe Punkt 6 für genauere Angaben: **„Wie werden die Reaktionen auf körperliche Ebene gemessen und warum? - Messungen der Blickbewegungen und des Pulses sowie die Entnahme von Biomaterialien Blut- und Speichelproben“**). Danach füllen Sie und Ihre Partnerin verschiedene Fragebögen aus. Im Anschluss werden Sie und Ihre Partnerin zu einem abschließendes Paargespräch gebeten. Die Gesamtdauer beträgt insgesamt ca. 160 Minuten.

Für diejenigen Paare, die auch an dem CBC-Training teilnehmen, erfolgen einmal wöchentliche, zweistündige Gruppen-Sitzungen, die ebenfalls zur Qualitätssicherung per Video aufgenommen werden. Am Ende jeder Sitzung erfolgt eine kurze Fragebogenbefragung (5 Min.). In den zehn Wochen des CBC-Trainings werden Übungen und teilweise Hausaufgabe bzw. Partnerübungen aufgegeben (jeweils 8-12 Min.). Sie werden vier Mal pro Woche morgens per Kurznachricht (sog. SMS) über Ihr Smartphone daran erinnert, und zu Ihrer Übung und Ihrer Befindlichkeit befragt. In der SMS befindet sich dazu ein Link. Wenn Sie auf diesen Link klicken, gelangen Sie zu einer kurzen, internetbasierten Abfrage, welche die Dauer und Intensität sowie ihr aktuelles Befinden erfragt (1-3 Min.). Das Beantworten dieser Fragen können Sie überall dort umsetzen, wo Sie ein internetfähiges Gerät nutzen können (z.B. Ihr Smartphone, Ihren Laptop, Ihr Tablet-PC etc.).

Die Paare, die nicht am CBC-Training teilnehmen, werden nur einmal wöchentlich per SMS zu ihrer aktuellen Befindlichkeit befragt (5 Min.). Die Termine der einzelnen Untersuchungsschritte und des CBC-Trainings werden mit Ihnen einzeln abgestimmt – hierzu werden wir Sie zeitnah persönlich kontaktieren. Bei Rückfragen können Sie sich jederzeit an die Projektleiter (Dr. Corina Aguilar-Raab, Dr. Marc N. Jarczok) wenden. Die entsprechenden Kontaktinformationen der Projektleitung entnehmen Sie bitte der ersten Seite dieser Informationsschrift.

#### **5. Wie werden die Reaktionen auf körperliche Ebene gemessen und warum? - Messungen der Blickbewegungen und des Pulses sowie Entnahme von Biomaterialien Blut- und Speichelproben -**

Der Nachweis biologischer Marker ist wichtig, da hierdurch deutlich wird, in welchem Maße Ihr Körper während einer positiven Interaktion mit Ihrer Partnerin unter Stress steht. Diese normale, körperliche Reaktion kann vom persönlichen



Belastungsempfinden deutlich abweichen. Die akute Aktivierung der biologischen Stresssysteme ist eine normale Reaktion und birgt keinerlei Gefahren für Ihre Gesundheit.

Sie und Ihre Partnerin liefern uns durch Ihre Mitarbeit dabei wichtige Daten, um ein eventuell verändertes Verhalten zwischen Ihnen beiden im Vergleich zu weniger psychisch belasteten Paaren zu erkennen. Des Weiteren werden die Werte Ihrer Biomarker vor und nach 10 Wochen bzw. nach dem CBC-Training verglichen, womit das Potential des Trainings zur objektiven Verbesserung partnerschaftlicher Interaktion und ihrer individuellen psychischen Belastung gemessen wird.

Mögliche pathologische Zufallsbefunde, also Ergebnisse der Untersuchungen die für Sie gesundheitlich von erheblicher Bedeutung sind und/oder einer weiteren Untersuchung bedürfen, teilt Ihnen die Studienleitung direkt nach der Auswertung mit, sofern Sie dies im Vorfeld wünschen. Unter dem Punkt „Zufallsbefund“ finden Sie für jede Untersuchung beschrieben, inwieweit dies möglich ist.

#### **24- Stunden Ein-Kanal-EKG**

Am Labortag 1 (siehe Seite 2) erhalten Sie von uns im Institut für Medizinische Psychologie einen Brustgurt, wie er auch im Sportbereich eingesetzt wird, den Sie direkt anlegen und für ca. 24 Stunden tragen. Die unkomplizierte Handhabung wird Ihnen vor Ort erklärt. Dieser Gurt schränkt den Alltag kaum ein, den Sie so fortführen sollten wie immer. Die Auswertung erfolgt nach der Gurtrückgabe im Institut für Medizinische Psychologie.

**Warum?** Die Langzeitmessung der Herzfrequenz („Puls“) über 24 Stunden gibt uns Auskunft über Erholung und Entspannung. So können wir die Balance zwischen Belastung und Ruhe der biologischen Systeme Ihres Körpers untersuchen.

**Mögliche Zufallsbefunde** können hierbei nur in geringem Ausmaß festgestellt werden, da wir keine Auswertung des EKGs, sondern allein die Abstände der Herzschläge, also die Herzfrequenz (Schläge des Herzens pro Minute) auswerten. D.h. einzig eine im Durchschnitt dauerhaft deutlich erhöhte Herzfrequenz, würden wir Ihnen mitteilen, sofern Sie dies wünschen.

#### **Speichelproben**

Am Labortag 2 werden wir Sie bitten, 20 Min. vor, direkt vor, direkt nach, und 20-30 Min. nach der positiven sozialen Interaktion eine geringe Menge Speichel abzugeben (pro Entnahme ca. 1 ml, insgesamt 4 mal). Für diese Speichelproben stellen wir Ihnen nummerierte und sortierte, einfach zu handhabende Speichelröhrchen zur Verfügung und erklären die Benutzung vor Ort.

**Warum?** Psychische Belastung führt zu einer gesteigerten Aktivierung der beiden Hauptstresssysteme im Körper, dem sympathischen Nervensystem (SNS) und der Hypothalamus-Hypophysen-Nebennierenrindenachse (HHNA). Aus 4 Speichelproben pro Proband erheben wir den Verlauf der Parameter dieser Stresssysteme: **Cortisol** (HHNA), **Alpha Amylase** (indirekt SNS) und **Immunparameter Interleukin IL-1 $\beta$**  und **IL-6** (indirekt mit Stress verbunden).

**Mögliche Zufallsbefunde:**



Interleukine (IL1- $\beta$  und IL6 aus Speichel): Keine bekannt.

Alpha-Amylase: Keine bekannt.

Speichel-Cortisol: Dauerhaft erhöhtes Cortisol im Speichel kann auf ein Cushing-Syndrom bzw. Morbus Cushing hindeuten.

### Blutproben

An Labortag 1 werden wir Ihnen mit Ihrer Erlaubnis insgesamt ca. 25 ml Blut abnehmen (das entspricht etwas mehr als 2 Esslöffeln). Für die Blutentnahme ist es nicht erforderlich, dass Sie nüchtern sind. **Warum?** Bei Stressreaktionen wird im Gehirn Serotonin freigesetzt. Dies kann jedoch nicht direkt gemessen werden. Wir erfassen die Einflüsse des Stresses auf das Gehirn deshalb indirekt über die Aktivierung des **Serotonin-Transporter-Gens (SLC6A4)**, welches im Blut nachgewiesen werden kann. Zusätzlich untersuchen wir die **genetische Aktivierung des Oxytocinrezeptors (OXTR)**, der mit Stresserleben und Bindungsverhalten in Zusammenhang steht. Beides wird über sogenannte „epigenetische“ Untersuchungen bestimmt. Hierbei wird explizit **nicht** ihr Genom entschlüsselt, sondern gemessen, in wie weit die zwei oben genannten Bereiche des Erbguts von den Körperzellen *abgelesen* werden. Folglich können auch keine Erbkrankheiten o.ä. aufgedeckt werden.

Ebenfalls werden **CRP** (C-reaktives Protein; indirekt mit Stress verbunden) und nochmals Interleukin **IL1-  $\beta$  und IL-6** im Blut gemessen. Dies ist das etablierte Verfahren zur Bestimmung der Parameter bei Stress. Mit Hilfe der zusätzlichen, oben beschriebenen Bestimmung der Interleukine im Speichel möchten wir prüfen, ob sich die Blut- und Speichelwerte im Verlauf ähnlich verhalten (steigen und fallen gemeinsam), so dass direkte Schlüsse von Speichel-Interleukine auf Blut-Interleukine gezogen werden können. Falls dies der Fall wäre, könnte bei zukünftigen Untersuchungen (z.B. wissenschaftlichen Studien zum Thema Depression) bei mehrfach nachgewiesenem Zusammenhang auf eine Blutentnahme verzichtet werden. Eine Speichelentnahme würde dann ausreichen.

### Mögliche Zufallsbefunde:

Entzündungsmarker IL-1 $\beta$ , IL-6, CRP: Erhöhte Werte deuten auf eine mögliche akute oder chronische Entzündung hin. Bei Diabetes Mellitus sind auch ohne zusätzlichen psychischen Stress CRP, IL1-  $\beta$  und IL-6 erhöht. Aus diesem Grund wird zum Ausschluss eines unbekanntes Diabetes Mellitus **HbA1c**, ein Langzeitmarker des Blutzuckers, bestimmt.

HbA1c: Leicht erhöhte Werte deuten auf einen Prä-Diabetes, erhöhte Werte deuten auf einen Diabetes Mellitus Typ II hin.

Epigenetische Marker (SLC6A4; OXTR): Keine bekannt.

Hinweis: Es wird kein umfassendes Blutbild erstellt. Das heißt, diese zu Forschungszwecken durchgeführte Untersuchung ersetzt nicht eine Blutentnahme bei einem Arzt.

Speicheluntersuchung und Herzfrequenzprofilauswertung sowie die Bestimmung des Interleukin 1 $\beta$  im Blut erfolgen im Institut für Medizinische Psychologie. CRP,



HbA1c und Interleukin 6 werden im Zentrallabor des Klinikums bestimmt. Am ZI Mannheim wird die epigenetische Auswertung von SLC6A4 und OXTR-Gen durchgeführt.

### **Eye Tracking und Videoaufzeichnung**

Beides findet am Labortag 2 während der zehnmütigen positiven sozialen Interaktion statt. Für diese Aufnahmen stehen entsprechende Geräte zur Erfassung der Blickbewegung, so genannte Eye-Tracker, auf einem Tisch zwischen Ihnen und Ihrer Partnerin. Außerdem zeichnen zwei Kameras den Kopf und Oberkörper des jeweiligen Gegenübers auf (sogenannte Szenenkameras), ohne die das Eye-Tracking nicht funktionieren würde. Es kommen **keine** Geräte zum Einsatz, die am Kopf o.ä. getragen werden. Sollten Sie eine Brille oder Kontaktlinsen tragen, bitten wir Sie, diese zur Untersuchung mitzubringen. Sollten Sie beides besitzen, bringen Sie bitte Ihre Kontaktlinsen mit, da diese beim Eye-Tracking leichter auswertbare Ergebnisse liefern.

**Warum?** Der Eye-Tracker ist ein Gerät, das aufzeichnet wohin Sie blicken. In mehreren Studien wurde bereits gezeigt, dass depressiv erkrankte Menschen im Vergleich zu nicht depressiv erkrankten Menschen ein verändertes Blickverhalten aufweisen. Bis jetzt wurde dies jedoch noch nie in einer echten Gesprächssituation zweier Partner systematisch untersucht.

Wir erhoffen uns hieraus neue Erkenntnisse zu erlangen zum Beispiel zur Veränderung der Aufmerksamkeitslenkung. Die Aufnahmen der Szenenkameras erlauben außerdem eine Untersuchung der Kommunikationsmuster. Unser Ziel ist es, Unterschiede im Blickverhalten aufdecken zu können.

**Zufallsbefunde:** Keine bekannt.

## **6. Was ist das CBC-Training?**

Wenn Sie am CBC-Training teilnehmen, werden Sie Methoden erlernen, die sich auf ein positives Miteinander in der Partnerschaft beziehen. Als nicht-religiöse (säkulare) Methode bietet das Training verschiedene Wege an, Mitgefühl gegenüber einem umfassenden Kreis an Menschen zu kultivieren und auszudehnen. Im Vordergrund stehen hier jedoch der Partner und die partnerschaftliche Beziehung.

Die darin beinhalteten Praktiken unterstützen die Entwicklung einer Vielzahl von positiven Qualitäten, Erfahrungen und Verhaltensweisen, wie z.B. Freundlichkeit, Dankbarkeit, als auch Empathie und Mitgefühl. Die fundamentale Grundannahme ist, dass Mitgefühl als eine Persönlichkeitseigenschaft entwickelt und erweitert werden kann. Diese Annahme wird durch aktuelle Forschungsergebnisse unterstützt.

Dieses CBC-Training kombiniert gedankliche Komponenten und Übungen (u.a. Istzustandsanalyse, Achtsamkeits- und Mitgefühlsmeditationen) und solche, die die Partnerschaft und das soziale Miteinander betreffen (z.B. Empathietraining). In standardisierten Labortests wurde bereits gezeigt, dass ein solches Training die psychische und körperliche Stress- und Immunantwort bei gesunden Individuen verbessert. Ob sich das Training auch bei Menschen mit Depressionen und auf die



Belastungen von Seiten des Partners entsprechend positiv auswirkt, und ob es einen positiven Einfluss auf die partnerschaftliche Interaktion hat, ist bisher noch nicht erforscht.

Die Teilnahme an einem CBC-Training über 10 Wochen würde nach aktuellem Stand etwa 300€ pro Person kosten. Für Sie und Ihre Partnerin ist bei entsprechender Zufallslosung dieses Training jedoch komplett **kostenfrei**.

## 7. Datenschutz und Aufbewahrung

Die von Ihnen zur Verfügung gestellten Daten und Biomaterialien werden ausschließlich für die wissenschaftliche Forschung verwendet und streng vertraulich behandelt. Ihnen wird bei der ersten Registrierung als Studienteilnehmer eine pseudonymisierte, verschlüsselte Identifikationsnummer (ID-Nummer, aufsteigend) zugeordnet. Dies ist ein Code, der auf Ihren ausgefüllten Fragebögen, Speichelproben etc. steht und keinerlei Informationen über Sie als Person beinhaltet. Alle Materialien, die gesammelt werden, werden mit dieser Nummer versehen. Nur die in Papierform vorliegende Einwilligungserklärung wird sowohl den Namen, als auch diese ID-Nummer enthalten und separat von allen Daten 2-fach verschlossen aufbewahrt werden. Es werden keine Daten mit dem Namen, sondern nur mit Ihrer ID-Nummer analysiert und es gibt außer über die Einwilligungserklärung keinen Weg, den Namen mit der ID-Nummer zu verbinden. Alle psychologischen und körperlichen Daten werden ausschließlich über ID-Nummern kenntlich gemacht. Keine Publikation dieses Projekts wird Ihren Namen preisgeben. Darüber hinaus werden die Ergebnisse sämtlicher Datenanalysen getrennt von Ihren personenbezogenen Daten gespeichert und können nicht ohne Mitwirkung der Projekt- oder Studienleitung Ihrer Person zugeordnet werden.

Diese Studie wird überwiegend aus öffentlichen Mitteln (z.B. der Deutschen Forschungsgemeinschaft DFG) finanziert. In Zukunft ergeben sich möglicherweise neue wissenschaftliche Fragestellungen, die im Rahmen des oben genannten Forschungsbereiches mithilfe der bereits erhobenen Daten oder Biomaterialien beantwortet werden können. Eine Veröffentlichung der Daten kann folglich bei der Beantwortung dieser neuen Fragestellungen helfen, wodurch vergleichbare Daten nicht nochmals erhoben werden müssten und öffentliche Mittel dadurch effizienter genutzt werden könnten.

Die erhobenen Daten werden dazu nach Beendigung der Studie der nationalen und internationalen Wissenschaft in anonymisierter Form durch eine Veröffentlichung über das Forschungsdatenrepositorium der Universität Heidelberg „heiDATA“ zugänglich gemacht. Dies dient zusätzlich der wissenschaftlichen Qualitätssicherung im Sinne der Nachvollziehbarkeit der erbrachten Studienergebnisse. Eine Aufbewahrung der Daten bei heiDATA erfolgt **ohne** persönliche Identifikatoren (z.B. Name oder Kontaktdaten).





Die auf diese Weise veröffentlichten Daten sowie auch Veröffentlichungen in wissenschaftlichen Fachartikeln, welche die Daten in anonymisierter Form verwenden, bleiben dauerhaft öffentlich verfügbar.

Die Daten, Biomaterialien und ausgefüllten Fragebögen werden Eigentum des Instituts für Medizinische Psychologie des Universitätsklinikums Heidelberg. Die Speichel- und Blutproben werden dort aufbewahrt, oder mit Ihrer ID-Nummer verschlüsselt auch an andere Labore verschickt, welche mit diesen Proben Analysen durchführen. Ein Teil der Blutproben wird vom Zentralinstitut für Seelische Gesundheit (Abteilung Genetische Epidemiologie in der Psychiatrie des Zentralinstituts für Seelische Gesundheit) in Mannheim aufbewahrt, das Ihre Blutproben mit einer anderen, separat erzeugten ID-Nummer verschlüsselt zur Analyse des genetischen Materials erhält. Alle in dieser Studie erhobenen Biomaterialien werden befristet auf maximal 10 Jahre nach Beendigung der Studie aufbewahrt. Falls in Zukunft eine wesentlich veränderte wissenschaftliche Fragestellung mithilfe Ihrer Probe untersucht werden soll, wird zuvor eine Stellungnahme der zuständigen Ethikkommission eingeholt.

## 8. Risiken und Nutzen der Teilnahme

### Risiken:

Mit dem Erheben der Fragebogendaten, der Videoaufnahmen, der Aufnahmen der Blickbewegungen, der Langzeitmessungen des Pulses und der Entnahme der Speichelproben sind keinerlei Risiken verbunden.

Mit den Blutentnahmen bestehen die Risiken, die mit einer normalen Blutentnahme verbunden sind. Die Entnahme einer Blutprobe ist in der Regel nur mit einem sehr geringen Risiko verbunden. An der Einstichstelle kann es zu leichten Schmerzen kommen oder es kann ein Bluterguss (blauer Fleck) entstehen, der evtl. einige Tage sichtbar ist. In äußerst seltenen Fällen kann auch die Bildung eines Blutgerinnsels (Thrombose), eine örtlich begrenzte Entzündung oder eine Infektion an der Einstichstelle auftreten oder es kann zu dauerhaften Schädigungen von Blutgefäßen oder Nerven kommen. Die Blutentnahmen werden von einem dazu befähigten und qualifizierten Fachpersonal (i.d.R. Arzt) durchgeführt.

Die Zuordnung zu Behandlungs- bzw. Kontrollgruppe erfolgt über ein Zufallsverfahren (sog. Randomisierung), worauf wir keinen Einfluss haben. Diejenigen die der Kontrollgruppe zugeordnet werden, erhalten von unserer Seite zunächst keine Intervention. Die übliche Wartezeit auf einen individuellen Psychotherapieplatz für die an Depression Erkrankten, kann durch eine reguläre allgemeinärztliche bzw. pharmakologische antidepressive Behandlung aufgenommen bzw. weitergeführt werden.

Für diejenigen Paare, die an dem CBC-Training teilnehmen, sind keine besonderen Risiken zu erwarten. Bisher sind keine unerwünschten Wirkungen in Verbindung

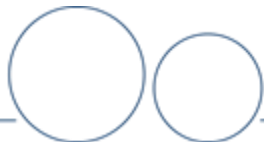

mit dem CBC-Training wissenschaftlich erfasst worden. Es sind keine körperlichen oder psychischen Gefahren zu erwarten. Durch die potenziell emotionalen Erfahrungen während der Trainingssitzungen kann es zu psychischen Reaktionen kommen, z.B. Stimmungsschwankungen. Diese Reaktionen werden in den Sitzungen jedoch berücksichtigt und als wichtige Erlebnisse in das Geschehen des Gruppentrainings einbezogen. Alle Gruppentrainings werden von Psychologen bzw. Psychotherapeuten und zusätzlich in CBCT qualifizierten Trainern, durchgeführt, sowie begleitend von erfahrenen Psychotherapeuten supervidiert.

#### **Nutzen:**

Das hier durchgeführte Forschungsvorhaben zielt auf eine Verbesserung unseres Verständnisses für die Entstehung depressiver Störungen sowie deren Therapie durch psychologische Interventionen ab. Hierbei interessiert uns explizit der Einfluss der Partnerschaft und inwiefern die Belastung des Partners hierbei eine Rolle spielt.

Für diejenigen, die an einem für Sie kostenlosen CBC-Training teilnehmen werden, liegt der persönliche Nutzen darin, dass Sie Veränderungsimpulse im Umgang mit psychischen Belastungen und vor allem des partnerschaftlichen Umgangs miteinander erhalten können. Beispielsweise könnten Sie im Verlauf des Trainings erleben, wie Sie mit einem positiveren Blick oder Gefühl Ihrer Partnerin begegnen können. Sie können Impulse für neue Verhaltensweisen erhalten und erfahren, wie es sich anfühlt, wenn Sie eine alternative Haltung zu Ihren Problemen einnehmen.

Nach Ende der Studie werden Ihnen die Gesamtergebnisse der Studie mitgeteilt. Für Ihre vollständige Teilnahme an der Studie erhält **jedes Paar** insgesamt eine Aufwandsentschädigung in Höhe von **200€, also 50€ pro Person pro Messzeitpunkt**, unbar auf ein anzugebendes Konto.

Nach vollständiger Studienteilnahme haben Sie die Möglichkeit als Dankeschön an dem gruppenbasierten Mitgefühlstraining für Paare (CBC-Training) teilzunehmen. Die Kosten hierfür werden vom Institut übernommen (circa 300€ pro Person).

### **9. Freiwilligkeit der Teilnahme**

Die Erhebung, Verarbeitung und Nutzung der Daten im Rahmen des Projektes erfolgt auf Basis der Rechtsgrundlage der freiwilligen und informierten Einwilligung der Teilnehmer (gemäß §§ 4, 4a BDSG). Sie nehmen an dieser Studie freiwillig teil. Sie können Ihre Teilnahme jederzeit auch ohne Angabe von Gründen abbrechen; dies hat keinerlei negative Konsequenzen für Ihre Kursteilnahme oder Ihre Gesundheitsversorgung. Die Zuteilung zur Trainings- oder Kontrollgruppe erfolgt über eine Zufallsauswahl, so dass wir an dieser Stelle keine persönlichen Präferenzen berücksichtigen können.

Die Untersuchungen werden nur dann durchgeführt, wenn Sie dazu freiwillig und schriftlich Ihre Einwilligung erklären.



## 10. Widerrufsrecht

Sie können Ihre Einwilligung zur Verwendung Ihrer Daten und Biomaterialien jederzeit ohne Angabe von Gründen und ohne nachteilige Folgen für Sie widerrufen. Im Falle eines Widerrufs können Sie entscheiden, ob Ihre Biomaterialien vernichtet und die dazu gehörenden Daten gelöscht werden sollen oder ob Sie in anonymisierter Form für weitere Forschungsvorhaben verwendet werden dürfen. Dies gilt auch dann, wenn die verschlüsselten Daten und Blutproben zur wissenschaftlichen Analyse verschlüsselt an das ZI Mannheim weitergegeben wurden. Bereits erhobene Daten verbleiben auch nach Vernichtung des Biomaterials bzw. des Fragebogens in der Studie, soweit der Personenbezug nicht mehr besteht.

### Wenden Sie sich für einen Widerruf bitte an die zuständige Studienleitung:

Prof. Dr. phil. Dipl.-Psych. Beate Ditzen  
Institut für Medizinische Psychologie im  
Zentrum für Psychosoziale Medizin (ZPM)  
Universitätsklinikum Heidelberg  
Bergheimer Str. 20, D-69115 Heidelberg  
Tel.: +49 6221 56 8150  
E-Mail: beate.ditzen@med.uni-heidelberg.de

## 11. Erneute Kontaktaufnahme

Es besteht die Möglichkeit der Kontaktaufnahme durch die Studienleitung, wenn die Ihnen entnommenen Biomaterialien wieder Erwarten Informationen enthalten, die für die Erhaltung oder Wiederherstellung Ihrer Gesundheit von erheblicher Bedeutung sind. Die Kontaktaufnahme wird durch die Studienleitung oder durch eine durch die Studienleitung beauftragte Person telefonisch, schriftlich oder per E-Mail erfolgen.

## 12. Versicherungsschutz

Für die Planung und Durchführung der Studie besteht ein Versicherungsschutz für Probanden im Rahmen der Betriebs-Haftpflichtversicherung des Universitätsklinikums Heidelberg. Der Versicherungsschutz erstreckt sich auf die gesetzliche Haftpflicht des Universitätsklinikums sowie auf die persönliche gesetzliche Haftpflicht aller im dienstlichen Auftrag für das Universitätsklinikum an der Studie mitwirkenden Mitarbeiter (Studienleiter, sonstiges Personal), beispielsweise für Schäden durch die Entnahme von Blutproben (Betriebs-/Umwelt-Haftpflicht-, Umweltschadens-Versicherung: Nr. 39327978 01116. Versicherer: HDI-Gerling Industrie Versicherung AG, HDI-Platz 1, 30659 Hannover, Telefon: +49 511 645-0, Telefax: +49 511 645-4545, E-Mail: info@hdi-gerling.de).



### 13. Weitere Informationen

Sollten Sie noch weitere Fragen haben, wenden Sie sich bitte an Ihre Studienleitung (die entsprechenden Kontaktinformationen finden Sie auf Seite 1 dieser Informationsschrift). Stellen Sie alle Fragen, die Ihnen wichtig erscheinen und lassen Sie sich ausreichend Zeit für Ihre Entscheidung zur Teilnahme an dieser wissenschaftlichen Untersuchung.

Mit freundlichen Grüßen

Dr. Corina Aguilar-Raab und Dr. Marc Jarczok  
(Projektleitung)

## SPRIT 2013 Checklist: Recommended items to address in a clinical trial protocol and related documents

| Section/item                                             | ItemNo | Description                                                                                                                                                                                                                                                                              | Executed       |
|----------------------------------------------------------|--------|------------------------------------------------------------------------------------------------------------------------------------------------------------------------------------------------------------------------------------------------------------------------------------------|----------------|
| <b>Administrative information</b>                        |        |                                                                                                                                                                                                                                                                                          |                |
| Title                                                    | 1      | Descriptive title identifying the study design, population, interventions, and, if applicable, trial acronym                                                                                                                                                                             | ✓ p.1          |
| Trial registration                                       | 2a     | Trial identifier and registry name. If not yet registered, name of intended registry                                                                                                                                                                                                     | ✓ p.2          |
|                                                          | 2b     | All items from the World Health Organization Trial Registration Data Set                                                                                                                                                                                                                 |                |
| Protocol version                                         | 3      | Date and version identifier                                                                                                                                                                                                                                                              | ✓ p.1          |
| Funding                                                  | 4      | Sources and types of financial, material, and other support                                                                                                                                                                                                                              | ✓ p.19-20      |
| Roles and responsibilities                               | 5a     | Names, affiliations, and roles of protocol contributors                                                                                                                                                                                                                                  | ✓ p.1 & p.20   |
|                                                          | 5b     | Name and contact information for the trial sponsor                                                                                                                                                                                                                                       | ✓ p.1          |
|                                                          | 5c     | Role of study sponsor and funders, if any, in study design; collection, management, analysis, and interpretation of data; writing of the report; and the decision to submit the report for publication, including whether they will have ultimate authority over any of these activities | not applicable |
|                                                          | 5d     | Composition, roles, and responsibilities of the coordinating centre, steering committee, endpoint adjudication committee, data management team, and other individuals or groups overseeing the trial, if applicable (see Item 21a for data monitoring committee)                         | not applicable |
| <b>Introduction</b>                                      |        |                                                                                                                                                                                                                                                                                          |                |
| Background and rationale                                 | 6a     | Description of research question and justification for undertaking the trial, including summary of relevant studies (published and unpublished) examining benefits and harms for each intervention                                                                                       | ✓ p.4-8        |
|                                                          | 6b     | Explanation for choice of comparators                                                                                                                                                                                                                                                    | ✓ p.14         |
| Objectives                                               | 7      | Specific objectives or hypotheses                                                                                                                                                                                                                                                        | ✓ p.8          |
| Trial design                                             | 8      | Description of trial design including type of trial (eg, parallel group, crossover, factorial, single group), allocation ratio, and framework (eg, superiority, equivalence, noninferiority, exploratory)                                                                                | ✓              |
| <b>Methods: Participants, interventions and outcomes</b> |        |                                                                                                                                                                                                                                                                                          |                |
| Study setting                                            | 9      | Description of study settings (eg, community clinic, academic hospital) and list of countries                                                                                                                                                                                            | ✓ p.8-9        |

|                                                                     |     |                                                                                                                                                                                                                                                                                                                                                                                |           |
|---------------------------------------------------------------------|-----|--------------------------------------------------------------------------------------------------------------------------------------------------------------------------------------------------------------------------------------------------------------------------------------------------------------------------------------------------------------------------------|-----------|
|                                                                     |     | where data will be collected. Reference to where list of study sites can be obtained                                                                                                                                                                                                                                                                                           |           |
| Eligibility criteria                                                | 10  | Inclusion and exclusion criteria for participants. If applicable, eligibility criteria for study centres and individuals who will perform the interventions (eg, surgeons, psychotherapists)                                                                                                                                                                                   | ✓ p.9     |
| Interventions                                                       | 11a | Interventions for each group with sufficient detail to allow replication, including how and when they will be administered                                                                                                                                                                                                                                                     | ✓ p.12-14 |
|                                                                     | 11b | Criteria for discontinuing or modifying allocated interventions for a given trial participant (eg, drug dose change in response to harms, participant request, or improving/worsening disease)                                                                                                                                                                                 | ✓ p.13    |
|                                                                     | 11c | Strategies to improve adherence to intervention protocols, and any procedures for monitoring adherence (eg, drug tablet return, laboratory tests)                                                                                                                                                                                                                              | ✓ p.14    |
|                                                                     | 11d | Relevant concomitant care and interventions that are permitted or prohibited during the trial                                                                                                                                                                                                                                                                                  | ✓ p.14    |
| Outcomes                                                            | 12  | Primary, secondary, and other outcomes, including the specific measurement variable (eg, systolic blood pressure), analysis metric (eg, change from baseline, final value, time to event), method of aggregation (eg, median, proportion), and time point for each outcome. Explanation of the clinical relevance of chosen efficacy and harm outcomes is strongly recommended | ✓ p.14-16 |
| Participant timeline                                                | 13  | Time schedule of enrolment, interventions (including any run-ins and washouts), assessments, and visits for participants. A schematic diagram is highly recommended (see Figure)                                                                                                                                                                                               | ✓ fig.3   |
| Sample size                                                         | 14  | Estimated number of participants needed to achieve study objectives and how it was determined, including clinical and statistical assumptions supporting any sample size calculations                                                                                                                                                                                          | ✓ p.17    |
| Recruitment                                                         | 15  | Strategies for achieving adequate participant enrolment to reach target sample size                                                                                                                                                                                                                                                                                            | ✓ p.9     |
| <b>Methods: Assignment of interventions (for controlled trials)</b> |     |                                                                                                                                                                                                                                                                                                                                                                                |           |
| <b>Allocation:</b>                                                  |     |                                                                                                                                                                                                                                                                                                                                                                                |           |
| Sequence generation                                                 | 16a | Method of generating the allocation sequence (eg, computer-generated random numbers), and list of any factors for stratification. To reduce predictability of a random sequence, details of any planned restriction (eg, blocking) should be provided in a separate document that is unavailable to those who enrol participants or assign interventions                       | ✓ p.11-12 |

|                                                           |     |                                                                                                                                                                                                                                                                                                                                                                                                              |                |
|-----------------------------------------------------------|-----|--------------------------------------------------------------------------------------------------------------------------------------------------------------------------------------------------------------------------------------------------------------------------------------------------------------------------------------------------------------------------------------------------------------|----------------|
| Allocation concealment mechanism                          | 16b | Mechanism of implementing the allocation sequence (eg, central telephone; sequentially numbered, opaque, sealed envelopes), describing any steps to conceal the sequence until interventions are assigned                                                                                                                                                                                                    | ✓ p.11-12      |
| Implementation                                            | 16c | Who will generate the allocation sequence, who will enrol participants, and who will assign participants to interventions                                                                                                                                                                                                                                                                                    | ✓ p.11-12      |
| Blinding (masking)                                        | 17a | Who will be blinded after assignment to interventions (eg, trial participants, care providers, outcome assessors, data analysts), and how                                                                                                                                                                                                                                                                    | ✓ p.11-12      |
|                                                           | 17b | If blinded, circumstances under which unblinding is permissible, and procedure for revealing a participant's allocated intervention during the trial                                                                                                                                                                                                                                                         | ✓ p.11-12      |
| <b>Methods: Data collection, management, and analysis</b> |     |                                                                                                                                                                                                                                                                                                                                                                                                              |                |
| Data collection methods                                   | 18a | Plans for assessment and collection of outcome, baseline, and other trial data, including any related processes to promote data quality (eg, duplicate measurements, training of assessors) and a description of study instruments (eg, questionnaires, laboratory tests) along with their reliability and validity, if known. Reference to where data collection forms can be found, if not in the protocol | ✓ p.9-11       |
|                                                           | 18b | Plans to promote participant retention and complete follow-up, including list of any outcome data to be collected for participants who discontinue or deviate from intervention protocols                                                                                                                                                                                                                    | ✓ p.11         |
| Data management                                           | 19  | Plans for data entry, coding, security, and storage, including any related processes to promote data quality (eg, double data entry; range checks for data values). Reference to where details of data management procedures can be found, if not in the protocol                                                                                                                                            | ✓ p.17 & 19    |
| Statistical methods                                       | 20a | Statistical methods for analysing primary and secondary outcomes. Reference to where other details of the statistical analysis plan can be found, if not in the protocol                                                                                                                                                                                                                                     | ✓ p.17         |
|                                                           | 20b | Methods for any additional analyses (eg, subgroup and adjusted analyses)                                                                                                                                                                                                                                                                                                                                     | not applicable |
|                                                           | 20c | Definition of analysis population relating to protocol non-adherence (eg, as randomised analysis), and any statistical methods to handle missing data (eg, multiple imputation)                                                                                                                                                                                                                              | ✓ p.17         |
| <b>Methods: Monitoring</b>                                |     |                                                                                                                                                                                                                                                                                                                                                                                                              |                |
| Data monitoring                                           | 21a | Composition of data monitoring committee (DMC); summary of its role and reporting structure; statement of whether it is independent from the sponsor and competing                                                                                                                                                                                                                                           | not applicable |

|                                 |     |                                                                                                                                                                                                                                                                                     |                |
|---------------------------------|-----|-------------------------------------------------------------------------------------------------------------------------------------------------------------------------------------------------------------------------------------------------------------------------------------|----------------|
|                                 |     | interests; and reference to where further details about its charter can be found, if not in the protocol. Alternatively, an explanation of why a DMC is not needed                                                                                                                  |                |
|                                 | 21b | Description of any interim analyses and stopping guidelines, including who will have access to these interim results and make the final decision to terminate the trial                                                                                                             | not applicable |
| Harms                           | 22  | Plans for collecting, assessing, reporting, and managing solicited and spontaneously reported adverse events and other unintended effects of trial interventions or trial conduct                                                                                                   | not applicable |
| Auditing                        | 23  | Frequency and procedures for auditing trial conduct, if any, and whether the process will be independent from investigators and the sponsor                                                                                                                                         | not applicable |
| <b>Ethics and dissemination</b> |     |                                                                                                                                                                                                                                                                                     |                |
| Research ethics approval        | 24  | Plans for seeking research ethics committee/institutional review board (REC/IRB) approval                                                                                                                                                                                           | ✓ p.19         |
| Protocol amendments             | 25  | Plans for communicating important protocol modifications (eg, changes to eligibility criteria, outcomes, analyses) to relevant parties (eg, investigators, REC/IRBs, trial participants, trial registries, journals, regulators)                                                    | ✓ p.19         |
| Consent or assent               | 26a | Who will obtain informed consent or assent from potential trial participants or authorised surrogates, and how (see Item 32)                                                                                                                                                        | ✓ p.19         |
|                                 | 26b | Additional consent provisions for collection and use of participant data and biological specimens in ancillary studies, if applicable                                                                                                                                               | not applicable |
| Confidentiality                 | 27  | How personal information about potential and enrolled participants will be collected, shared, and maintained in order to protect confidentiality before, during, and after the trial                                                                                                | ✓ p.19         |
| Declaration of interests        | 28  | Financial and other competing interests for principal investigators for the overall trial and each study site                                                                                                                                                                       | ✓ p.19         |
| Access to data                  | 29  | Statement of who will have access to the final trial dataset, and disclosure of contractual agreements that limit such access for investigators                                                                                                                                     | ✓ p.19         |
| Ancillary and post-trial care   | 30  | Provisions, if any, for ancillary and post-trial care, and for compensation to those who suffer harm from trial participation                                                                                                                                                       | not applicable |
| Dissemination policy            | 31a | Plans for investigators and sponsor to communicate trial results to participants, healthcare professionals, the public, and other relevant groups (eg, via publication, reporting in results databases, or other data sharing arrangements), including any publication restrictions | ✓ p.19         |
|                                 | 31b | Authorship eligibility guidelines and any intended use of professional writers                                                                                                                                                                                                      | not applicable |
|                                 | 31c | Plans, if any, for granting public access to the full protocol, participant-level dataset, and                                                                                                                                                                                      | ✓ p.19         |



1  
2  
3  
4  
5  
6  
7  
8  
9  
10  
11  
12  
13  
14  
15  
16  
17  
18  
19  
20  
21  
22  
23  
24  
25  
26  
27  
28  
29  
30  
31  
32  
33  
34  
35  
36  
37  
38  
39  
40  
41  
42  
43  
44  
45  
46

|                            |    | statistical code                                                                                                                                                                               |            |
|----------------------------|----|------------------------------------------------------------------------------------------------------------------------------------------------------------------------------------------------|------------|
| <b>Appendices</b>          |    |                                                                                                                                                                                                |            |
| Informed consent materials | 32 | Model consent form and other related documentation given to participants and authorised surrogates                                                                                             | ✓ app. 1-3 |
| Biological specimens       | 33 | Plans for collection, laboratory evaluation, and storage of biological specimens for genetic or molecular analysis in the current trial and for future use in ancillary studies, if applicable | ✓ p.9-11   |

For peer review only

# BMJ Open

## Enhancing Social Interaction in Depression (SIDE Study) – Protocol of a randomized controlled trial on the effects of a Cognitively-Based-Compassion-Training (CBCT®) for Couples

|                                 |                                                                                                                                                                                                                                                                                                                                                                                                                                                                                                                                                                                                                                                                                                                                                                                                                               |
|---------------------------------|-------------------------------------------------------------------------------------------------------------------------------------------------------------------------------------------------------------------------------------------------------------------------------------------------------------------------------------------------------------------------------------------------------------------------------------------------------------------------------------------------------------------------------------------------------------------------------------------------------------------------------------------------------------------------------------------------------------------------------------------------------------------------------------------------------------------------------|
| Journal:                        | <i>BMJ Open</i>                                                                                                                                                                                                                                                                                                                                                                                                                                                                                                                                                                                                                                                                                                                                                                                                               |
| Manuscript ID                   | bmjopen-2017-020448.R1                                                                                                                                                                                                                                                                                                                                                                                                                                                                                                                                                                                                                                                                                                                                                                                                        |
| Article Type:                   | Protocol                                                                                                                                                                                                                                                                                                                                                                                                                                                                                                                                                                                                                                                                                                                                                                                                                      |
| Date Submitted by the Author:   | 27-Feb-2018                                                                                                                                                                                                                                                                                                                                                                                                                                                                                                                                                                                                                                                                                                                                                                                                                   |
| Complete List of Authors:       | Aguilar-Raab, Corina; UniversitätsKlinikum Heidelberg, Institute of Medical Psychology<br>Jarczok, Marc; University Hospital Ulm, Clinic of Psychosomatic Medicine and Psychotherapy<br>Warth, Marco; UniversitätsKlinikum Heidelberg, Institute of Medical Psychology<br>Stoffel, Martin; UniversitätsKlinikum Heidelberg, Institute of Medical Psychology<br>Tieck, Maria; UniversitätsKlinikum Heidelberg, Institute of Medical Psychology<br>Berg, Judith; UniversitätsKlinikum Heidelberg, Institute of Medical Psychology<br>Negi, Lobsang; Emory College, Emory University, Department of Religion<br>Harrison, Tim; CBCT® Teacher Training, Emory University, Emory-Tibet Partnership<br>Pace, Thaddeus; The University of Arizona<br>Ditzen, Beate; UniversitätsKlinikum Heidelberg, Institute of Medical Psychology |
| <b>Primary Subject Heading</b>: | Mental health                                                                                                                                                                                                                                                                                                                                                                                                                                                                                                                                                                                                                                                                                                                                                                                                                 |
| Secondary Subject Heading:      | Mental health                                                                                                                                                                                                                                                                                                                                                                                                                                                                                                                                                                                                                                                                                                                                                                                                                 |
| Keywords:                       | Depression & mood disorders < PSYCHIATRY, study protocol, mindfulness- and compassion based intervention, psychobiological indicators of health                                                                                                                                                                                                                                                                                                                                                                                                                                                                                                                                                                                                                                                                               |
|                                 |                                                                                                                                                                                                                                                                                                                                                                                                                                                                                                                                                                                                                                                                                                                                                                                                                               |

SCHOLARONE™  
Manuscripts

1  
2  
3 Enhancing Social Interaction in Depression (SIDE Study) – Protocol of a  
4 randomized controlled trial on the effects of a Cognitively-Based-Compassion-  
5 Training (CBCT®) for Couples  
6  
7  
8  
9

10  
11 Corina Aguilar-Raab<sup>1</sup>★, Marc N. Jarczok<sup>1,2</sup>★, Marco Warth<sup>1</sup>, Martin Stoffel<sup>1</sup>, Maria Tieck<sup>1</sup>,  
12  
13 Judith Berg<sup>1</sup>, Lobsang Tenzin Negi<sup>3</sup>, Tim Harrison<sup>4</sup>, Thaddeus W.W. Pace<sup>5</sup>, & Beate Ditzen<sup>1</sup>  
14  
15

16  
17 <sup>1</sup> Institute of Medical Psychology, Center for Psychosocial Medicine, University Hospital,  
18  
19 Heidelberg University, Heidelberg, Germany  
20

21  
22 <sup>2</sup> Department of Psychosomatic Medicine and Psychotherapy, University Clinic Ulm, 89081  
23  
24 Ulm, Germany  
25

26  
27 <sup>3</sup> Emory-Tibet Partnership, Center for Contemplative Science and Compassion-Based Ethics,  
28  
29 Department of Religion, Emory College, Emory University, Atlanta, GA, USA  
30

31  
32 <sup>4</sup> Emory-Tibet Partnership, Center for Contemplative Science and Compassion-Based Ethics,  
33  
34 CBCT® Teacher Training, Emory University, Atlanta, GA, USA  
35

36  
37 <sup>5</sup> College of Nursing, College of Medicine (Department of Psychiatry), College of Science  
38  
39 (Department of Psychology), University of Arizona, Tucson, AZ, USA  
40

41  
42 ★Shared first authorship. These authors contributed equally to the manuscript.  
43  
44

45 **Corresponding author:**

46  
47 Corina Aguilar-Raab  
48  
49 Institute of Medical Psychology, Center for Psychosocial Medicine, University Hospital,  
50  
51 Heidelberg University

52 Bergheimer Str. 20, 69115 Heidelberg, Germany

53  
54 Phone: +49 6221 56-8135

55  
56 E-mail: corina.aguilar-raab@med.uni-heidelberg.de

57  
58 Word count: 11.300 (version: v4; Date: 02/22/2018)  
59

## Abstract

Introduction: Positive social interactions and stable relationships can exert substantial benefits on health. However, patients suffering from depression benefit less from these health-promoting effects. Moreover, relationship quality and even partners' health has been found to be negatively affected by depressive symptomatology, which may result in overall impairments in social functioning of a romantic couple. Psychobiological research indicates that these impairments may be accompanied by a maladaptive regulation of the patient's neuroendocrine response to external stressors. Concerning the improvement of social functioning, first studies showed promising results of Cognitively-Based-Compassion-Training (CBCT®). However, randomized trials are still scarce. Previous programs did not involve participation of the patient's romantic partner. Therefore, the present study aims to investigate whether a CBCT® program adapted for couples (CBCT®-fC) can improve depressive symptoms, distress, social interaction skills, and the neurobiological regulation of stress.

Methods and Analysis: Couples with the female partner suffering from depression will be invited to participate in a pre-to-post intervention assessment on two consecutive days, respectively, involving a standardized positive social interaction (PSI) task, eye-tracking, electrocardiogram-recordings, saliva- and blood-sampling, and questionnaire data. After baseline assessment, participating couples will be randomized to either a 10-week CBCT®-fC or to a treatment as usual control condition. The primary endpoint is the reduction of depressive symptoms measured by the Hamilton Depression Rating Scale. Secondary outcomes encompass self-rated depression (Beck Depression Inventory), attention toward the partners face during PSI (eye tracking), stress-related biomarkers (cortisol,  $\alpha$ -amylase, interleukin (IL)-1 $\beta$ /-6, heart rate variability), methylation of oxytocin-receptor- and serotonin-transporter-genes, and self-ratings of psychological constructs such as relationship quality and empathy.

Ethics and Dissemination: Ethical approval has been obtained by the Ethics Committee of the Medical Faculty Heidelberg. Results will be presented in international, peer-reviewed journals and on conferences in the field of clinical psychology and psychiatry.

Trial registration: From ClinicalTrials.gov., Identifier: NCT03080025 (registered: 08.03.2017).

## Strengths and limitations:

- This is the first randomized controlled trial to investigate the effects of a group-based compassion meditation program for couples (CBCT®-fC).
- We focus on females suffering from depression.
- The study employs novel methods, assessing positive real-time social interaction of romantic partners in combination with psychobiological indicators of health.
- Several processes previously reported to be involved in the etiology and basic mechanisms of social functioning that are part of the psychopathology of depression are investigated simultaneously.
- Comparison with TAU control group does not allow one to draw conclusions about the specificity of CBCT®-fC.

## Background

Depression is one of the most prevalent mental disorders worldwide.[1, 2] Besides changes in self-referential affect and cognition, depressive disorders have been associated with social deficits. Impaired social functioning of depressive patients could account for both a worsening of the illness to chronic levels, and for a generally degraded physical health status, which in turn, may be accompanied by severe alterations of the biological stress and immune systems.[1, 3] It is crucial to examine how depressive patients' impaired social functioning maintains and/or aggravates the overall impact of the illness, and how disease progression interacts with the close social environment around a patient, in particular with the supportive partner.[4]

### Impaired social functioning in depression

Positive social interactions can exert substantial benefits on health and even survival rates of individuals.[3, 5] For the majority of adults, couple relationships represent the central social bond and are the main source of social support.[6] However, patients with chronic mental illnesses, such as depression, seem to benefit less from these health-protective effects. Current research has shown a bidirectional association between depression and relationship quality.[7] Problematic relationships may reinforce depressive symptoms in the romantic partners. However, depression and subsequent deficiencies in social functioning are strongly associated with a decrease in marital quality.[8, 9] Consequently, depression also affects the romantic partner and his/her health.[10]

The incapacities for those with depression to socially connect and affiliate with others might lead to a tendency for social withdrawal and non-approaching behavior. Depressed individuals tend to be afraid of social rejection and the subsequent negative emotions, and expect less support and kindness from others.[11] This may be accompanied by a reduced capacity to adaptively engage in social interaction and communication, and a diminished ability for empathic accuracy and perspective taking.[12]

Underlying this, depressed individuals have been found to exhibit biased information processing including a distorted attention for social stimuli.[13] Hence, impaired processing and attentional disengagement from negative self-referencing information take place, i.e. reduced maintenance of gaze towards positive stimuli, and in contrast, increased

1  
2  
3 maintenance of gaze towards negative stimuli.[14, 15] It is likely that this biased cognitive  
4 information processing may transfer to marital interaction as well.  
5  
6  
7

### 8 **Psychobiological underpinnings**

9  
10 While more research is still needed in order to understand how social-cognitive processes in  
11 couples may affect physical health outcomes[7], it seems consistent that severe or chronic  
12 depression is associated with alterations in the psychobiological stress and immune systems,  
13 including cortisol,[16, 17] alpha-amylase (sAA),[18, 19] vagally mediated heart rate variability  
14 (vmHRV),[20] and pro-inflammatory cytokine regulation (IL-6 and IL-1 $\beta$ , and high sensitive C-  
15 reactive protein (hsCRP).[21] Additionally, stress-associated alterations of methylation  
16 patterns in the gene encoding the serotonin transporter activation (SLC6A4) have been  
17 found in patients with depression.[22]

18  
19 Maladaptive alterations in the hypothalamic-pituitary-adrenal (HPA) system's response to  
20 chronic stress have been proposed as a potential pathophysiological mechanism in the  
21 development of depressive disorders, with dysregulation of glucocorticoid release (in  
22 particular cortisol) being one of the most frequently studied phenomena.[23, 24] Changes in  
23 the diurnal rhythms of cortisol release may in part be responsible for disordered circadian  
24 physiology involving sleep patterns and body temperature rhythms. Increased levels of  
25 morning cortisol may be a risk factor for subsequent depression.[16, 25] Moreover, a meta-  
26 analysis by Stetler and Miller found both higher basal cortisol levels[26] and elevated cortisol  
27 release in response to acute psychosocial stress challenge in depressed versus healthy  
28 individuals[17]. The magnitude and direction of these cortisol effects, however, were found  
29 to be strongly dependent on moderating variables such as methodological quality, type of  
30 cortisol assessment, sex, measurement time, or type of stress task[17, 26]. In particular,  
31 women with remitted depression showed a blunted cortisol response to a psychologically  
32 stressful task compared to healthy controls, while cortisol reactivity was increased in  
33 depressed men.[27, 28] Together these findings suggest that more research is needed,  
34 although there is evidence for HPA-axis dysregulation in major depression.  
35  
36  
37  
38  
39  
40  
41  
42  
43  
44  
45  
46  
47  
48  
49

50  
51 Concerning the human stress response, the HPA axis interacts with the autonomic nervous  
52 system (ANS) in the context of both acute and chronic stress challenge situations. Recent  
53 studies highlight the importance of monitoring both systems simultaneously, in order to gain  
54 a better understanding of the pathophysiological mechanisms involved with depression.[18]  
55  
56  
57  
58  
59  
60

1  
2  
3 Available evidence suggests that acute stress is related to higher momentary salivary alpha-  
4 amylase (sAA) activity. sAA is an enzyme mainly secreted by the parotid glands in response  
5 to adrenergic innervation, and has been studied as a proxy for the sympatho-adreno-  
6 medullary (SAM) branch of the ANS. sAA stimulation may involve activation of further  
7 physiological sub-systems (e.g. parasympathetic fibers)[29], and prior studies suggest that  
8 acute sAA changes may reflect ANS dysfunction in patients with mental disorders.[19]  
9 Furthermore, sAA secretion has been associated with depression and feelings of shame.[30,  
10 31] In addition, sAA levels have been found to be significantly higher before and after an  
11 electrical stimulation stressor in depressed individuals than in healthy controls.[28] While  
12 some authors have raised issues about the validity of sAA as a biomarker of SAM  
13 activation[29], others highlight the potential of sAA to monitor SAM along with HPA activity  
14 in saliva (instead of in blood).[18, 19, 30]

23  
24 Previous research investigating the involvement of the parasympathetic branch of the ANS in  
25 the pathophysiology of depression has focused mainly on the study of vmHRV. Compared to  
26 healthy individuals, depressed patients have been found to exhibit parasympathetic  
27 withdrawal, and prior studies have reported a negative association between depressive  
28 symptoms and resting state short-term measures of vmHRV.[20, 32] In contrast, higher  
29 levels of sadness have been associated with increased *circadian* variation of vmHRV  
30 measures, but only in females.[32] Similar, we investigated the circadian variation pattern by  
31 mild depressive symptoms in a large, rather healthy occupational sample. Depressive  
32 symptoms were found to be negatively associated with the 24h mean (MESOR) and  
33 oscillation amplitude in men but positively associated in women. This pattern of findings  
34 indicates a blunted day-night rhythm of vagal activity in men with greater depressive  
35 symptoms as well as a moderation effect of sex in the association of CVP and depressive  
36 symptoms.[33] Moreover, we have shown in a study with nonhuman primates that greater  
37 amounts of depressive-like behavior is associated with elevated levels of vmHRV in adult  
38 female cynomolgus monkeys (*Macaca fascicularis*).[34] We believe that this finding is  
39 evidence of a cross-species psychophysiological alterations of heart rate variability in  
40 depression.

41  
42 Stress-related chronic HPA-axis and ANS dysfunctions can promote the release of cytokines  
43 from the macrophages, resulting in symptoms of fatigue and loss of appetite.[21, 35]  
44 Depressed patients exhibit higher circulating concentrations of pro-inflammatory cytokines,  
45  
46  
47  
48  
49  
50  
51  
52  
53  
54  
55  
56  
57  
58  
59  
60



1  
2  
3 particularly interleukin (IL)-6 and IL-1 $\beta$ , which were found to be indicative of a non-specific  
4 immune response (i.e. without an identifiable pathogen or injury to tissues).[36, 37] In line  
5 with these findings, administration of cytokines in animal models and humans results in  
6 behavioral symptoms that are common in depression, such as depressive mood or slowed  
7 psychomotor activity.[21]

8  
9  
10  
11 The vulnerability for depression – especially with regard to early adversity – is also believed  
12 to involve genetic factors, in combination with environmental exposure across the lifespan.  
13 Gene-environment interactions have been found to alter the risk for the development of  
14 major depression. Altered gene expression is rooted in changes in chromatin structure, and  
15 alterations in these epigenetic marks are connected to depression.[38] Changes in  
16 methylation in the promoter of the serotonin transporter gene SLC6A4 have been focused in  
17 several studies investigating depression. For example, decreased methylation of SLC6A4 has  
18 been found in stress-exposed shift-working nurses, and was also related to burnout.[39]  
19 However, in contrast, increased methylation was described in depressed patients with low  
20 quality of life and functioning.[e.g. 22] These diverse findings may be due to the analysis of  
21 different Cytosin-phosphatidyl-Guanin, or CpG sites in each study.[38] Thus, while overall  
22 methylation of serotonin transporter genes and their expression seem significantly  
23 associated with the reactivity of HPA-axis and ANS in depression,[40, 41] the precise  
24 direction of each specific alteration in the related CpGs needs further investigation. In  
25 accordance with SLC6A4 data, oxytocin receptor gene (OXTR) methylation patterns have  
26 been associated to neural activity to the perception/cognition of social stimuli[42] and  
27 relationship functioning.[43] In previous studies, interpersonal functioning – like rejection  
28 sensitivity or less support seeking, which is predominant in depressed individuals – was  
29 linked to OXTR gene polymorphisms.[44] To date, it remains unclear whether serotonin or  
30 oxytocin related epigenetic processes underlie alterations of interpersonal functioning in  
31 depression and might be interpreted as evaluation criteria for therapy. For example, SLC6A4  
32 methylation has been associated with the responsiveness of patients to pharmacological  
33 anti-depressive treatment, and treatment with selective serotonin reuptake inhibitors has  
34 been found to result in higher levels of methylation of SLC6A4[45], and lower levels of  
35 methylation in neuroblastoma cells treated with quetiapine .[46] Besides pharmacologically  
36 induced alterations in epigenetic patterns, a new area in psychiatric research suggests that  
37 epigenetic mechanisms are not only involved in psychopathology, but also in the  
38  
39  
40  
41  
42  
43  
44  
45  
46  
47  
48  
49  
50  
51  
52  
53  
54  
55  
56  
57  
58  
59  
60

1  
2  
3 development of resilience[47] and responsiveness of patients with mental disorder to  
4 behavioral interventions.[48] Within this framework, SLC6A4 methylation has been shown to  
5 be increased in individuals with social anxiety, but only those who respond to cognitive  
6 behavioral therapy.[49] In addition, the severity of depressive symptoms has been shown to  
7 be associated with levels of SLC6A4 methylation[50], indicating a covariation of the two.  
8 These findings also suggest that SLC6A4 methylation may be susceptible to change as a  
9 result of interventions that target depressive symptoms.  
10  
11  
12  
13  
14  
15

### 16 **Mindfulness, compassion and compassion-based interventions**

17  
18 Mindfulness is defined as the intentional directing of attention towards the present  
19 moment, combined with an attitude of acceptance and non-reactivity.[51-53] Mindfulness  
20 can be trained and increased through sustainable exercise, such as breathing meditation. It  
21 is associated with coping-strategies in achieving a healthier or better handling with the inner  
22 stress-response towards perceived stressors.  
23  
24  
25

26  
27 Subsequent to the successful implementation of the Mindfulness Based Stress Reduction  
28 (MBSR) program[54-57], more scrutiny has been placed on understanding the mechanisms  
29 of how mindfulness promotes positive change for greater well-being. In a recent study, we  
30 could show that enhanced mindfulness as a result of MBSR participation is accompanied by  
31 two other important health-related psychological constructs – distress tolerance and  
32 resilience.[58] In addition to other refined and revised approaches, such as the Mindfulness  
33 Based Cognitive Therapy (MBCT),[59, 60] current research in the field of “contemplative  
34 studies” has begun to focus more on compassion and interventions such as the Cognitively-  
35 Based Compassion Training (CBCT®).[61-63] The definition of compassion highlights social  
36 aspects explicitly: in addition to the competency to recognize sorrowful states, compassion  
37 includes the prosocial motivation to deal with determining factors of suffering, and to  
38 contribute to their change.[64]  
39  
40  
41  
42  
43  
44  
45  
46

47  
48 Secular meditation trainings that address loving kindness and compassion can enhance  
49 positive emotions and social support, which are associated with perceived social  
50 connectedness.[65, 66] Furthermore, they can lead to faster cortisol recovery subsequent to  
51 a social stress test as well as reduced responsiveness of inflammation to psychosocial  
52 stress.[67] However, studies (either laboratory or intervention) shedding light into the  
53 interplay between psychological and biological factors are still rare.  
54  
55  
56  
57  
58  
59  
60

1  
2  
3 Mindfulness has already been successfully integrated into the context of couples, such as  
4 mindfulness-based relationship enhancement,[68] and improving relationship satisfaction  
5 and functioning.[68-70] As far as couples are concerned, no study has yet investigated the  
6 impact of compassion enhancement on aspects of relationship quality. Current findings  
7 suggest that strong connections may be found between self-compassion and aspects of  
8 healthy interpersonal relationship functioning such as increased caring, kindness, and higher  
9 levels of relatedness.[71] Moreover, higher self-compassion has been positively associated  
10 with compromise behavior in the context of romantic relationships.[72] Given this  
11 background, we believe the application of compassion training to depressive patients with  
12 impairments in interaction skills and their partners is a promising approach. Moreover, a  
13 group-based couple intervention additionally takes into account the partner's needs, and  
14 may therefore provide a better integration of intervention benefits into patient couples'  
15 daily life.

16  
17 We therefore adapted a group-based compassion meditation training program (see below)  
18 for couples, intending to improve social interactional functioning in couples where one  
19 member of the dyad is diagnosed with depression. The project will also work in a preliminary  
20 manner to determine if the compassion meditation training program is associated with  
21 positive change in psychobiological indicators of health, as well as decreases in the severity  
22 of depression features.

### 33 34 35 36 37 **Objectives**

38  
39 The proposed study aims to evaluate whether a CBCT<sup>®</sup> intervention for couples (CBCT<sup>®</sup>-fC),  
40 with the female partner suffering from depression, can:

- 41 1. reduce depressive symptoms in the female partner,
- 42 2. improve social cognition processes and interpersonal skills of the female partner, and
- 43 3. reduce stress reactivity (measured as cortisol, sAA, and markers of inflammation) to  
44 social interactions in both partners that is associated with alterations in methylation  
45 patterns of SLC6A4 and OXTR.

46  
47 We expect the improvement of couples participating in CBCT<sup>®</sup>-fC to be superior compared to  
48 those receiving treatment as usual (TAU).

## Method

### Study design

This study will be conducted in a prospective, parallel randomized controlled design, comparing CBCT<sup>®</sup>-fC with a TAU control condition. Changes in outcome measures from baseline (T1 at week 8-10 after recruitment start); to post-intervention assessment (T2 week 20-21 after recruitment start); to follow up 4-week post Intervention (FU1 week 24-25) and to 12-week follow up post intervention (FU2 week 33-34) will be compared between the two study arms (Figure 1). Data assessment and interventions will be carried out at the Institute of Medical Psychology (IMP), Center for Psychosocial Medicine, University Hospital Heidelberg, Germany. The IMP will provide the laboratory infrastructure for biomarker analysis (freezer space, centrifuge) and therapy rooms equipped with audio and video devices for presentations / exercises and assuring intervention adherence.

<insert Fig. 1>

### Recruitment

We will use the following sources to recruit participants: Newspaper advertising, posters and flyers in public places, advertising in public transport, advertising in social media, and university mailing lists. We will additionally contact registered doctors, psychiatric and psychosomatic clinics, as well as outpatient centers for counseling and psychotherapy. The enrollment of the first depressed couple has started on March 28th, 2017.

### Participants

The study described here focuses primarily on females due to several reasons: Current prevalence rates of major depression indicate that females are affected twice as often as men; there also seem to be some differences in the phenomenological symptomatology. Additionally, as the study focuses on psychobiological markers and as there are hormonal differences in women and men, and for financial and infrastructural (feasibility) reasons, we had to keep the sample size manageable.

Female patients are included if they 1) are at least 20 years old, 2) have a romantic relationship for at least 2 years, and 3) are diagnosed with a primary recurrent depressive disorder (ICD-10: F33.0 or F33.1) by the Structured Clinical Interview (SCID) of the Diagnostic

1  
2  
3 and Statistical Manual of Mental Disorders (DSM-V)[73] in combination with the observer-  
4 based Hamilton Depression Rating Scale (HDRS  $\geq 12$ ; within the range of a mild  
5 depression)[74] and the Beck Depression Inventory (BDI-II  $\geq 16$ ; within the range of mild  
6 depression) self-rating.<sup>1</sup>[75, 76] General exclusion criteria for the female patients are: 1)  
7 other severe mental disorders (such as psychotic symptoms; bipolar disorders, acute suicidal  
8 tendency), 2) altered physical condition (pregnancy, chronic or severe metabolic,  
9 endocrinological, neurological, nephrological, cardiac or hepatic conditions), 3) heavy  
10 smoking ( $\geq 20$  cigarettes/ day), substance abuse or acute addiction, 4) enrolling in  
11 psychological therapies (couple therapy; individual psychotherapy – except for probatory  
12 phase including a maximum of the first six sessions), and 5) current participation in a  
13 mindfulness- or compassion-based group training.

14  
15  
16  
17  
18  
19  
20  
21 Male partners are included if they 1) are at least 20 years of age, 2) have a romantic  
22 relationship for at least 2 years (with the targeted depressed female partner), and 3) are not  
23 diagnosed with a primary recurrent depressive disorder (ICD-10: F33.0 or F33.1) by the  
24 Structured Clinical Interview (SCID) of the Diagnostic and Statistical Manual of Mental  
25 Disorders (DSM-V).[73] General exclusion criteria for the male patients are primarily with  
26 regard to acute mental disorders at baseline not life span: 1) other severe mental disorders  
27 (such as psychotic symptoms; bipolar disorders, acute suicidal tendency), 2) altered physical  
28 condition (chronic or severe metabolic, endocrinological, neurological, nephrological, cardiac  
29 or hepatic conditions), 3) heavy smoking ( $\geq 20$  cigarettes/ day), substance abuse or acute  
30 addiction, 4) enrolling in couple therapy; and 5) current participation in a mindfulness- or  
31 compassion-based group training.

### 42 **Patient and public involvement**

43  
44 Overall, the patients are not involved neither in the design nor in recruitment or conduction  
45 of the study. In a piloting phase we tested all the materials, questionnaires and laboratory  
46  
47

---

48  
49  
50 <sup>1</sup> The cut off scores for the HDRS German version are defined as follows:  $\leq 8$  =  
51 normal/remitted; 9-16 = mild; 17-24 = moderate;  $\geq 25$  severe depression and for the BDI-II  
52 German version:  $\leq 13$  = normal/remitted; 13-19 = mild; 20-28 = moderate;  $\geq 29$  severe  
53 depression. These cut off scores are defined by the S3-guidelines of the Working Group of  
54 the Scientific Medical Societies of Germany.[76]  
55  
56  
57

1  
2  
3 assessments. Due to the participants' experience and feedback, we reduced the quantity of  
4 questionnaires, changed the procedure of the surveys and laboratory/psychobiological  
5 assessments in order to significantly reduce the effort and expense. With regard to the RCT  
6 design, we ask each participant to evaluate study-related measures, design and the  
7 intervention itself. All participants will receive the published articles with the final results of  
8 the study, and a short summary of the major findings will be provided in an email.  
9  
10  
11  
12

## 13 14 15 **Procedures**

### 16 ***Baseline assessment (T1)***

17  
18 After confirming eligibility of both members of a couple in initial and separate telephone  
19 screenings, couples will be invited to two consecutive laboratory days. On ***lab day 1***, we will  
20 inform the participants about the study goals and procedures, and ask them to complete the  
21 informed consent form. Participants will then be interviewed to complete the SCID and  
22 HDRS observer rating to assess for the presence of mental (particularly depressive)  
23 disorders. While one partner is interviewed, the other will be asked to fill out a series of  
24 questionnaires including the BDI-II and several scales on relationship quality, empathy, and  
25 symptom burden (see Table 1). Afterwards, a medical assistant will take blood samples from  
26 both partners of approximately 25 ml each, using EDTA Vacutainers and PAXgene Blood RNA  
27 Tubes, allowing for the analysis of immune and epigenetic parameters. The genes SLC6A4  
28 and OXTR will be analyzed for methylation of CpG-sites and their promoter-regions, referring  
29 to polymorphisms and mRNA-expression. Blood samples will be stored in the IMP's  
30 biochemical laboratory and will then be transferred to the Central Institute of Mental Health  
31 in Mannheim, Germany, and to the Central Laboratory at Heidelberg University, for further  
32 analyses. After blood sampling, each individual will be fitted with a one-lead ambulatory  
33 electrocardiogram (ECG) monitor (eMotion FAROS 180°) for 24h recording. Participants will  
34 also be instructed in the handling of the device.  
35  
36  
37  
38  
39  
40  
41  
42  
43  
44  
45  
46

47 ***Lab day 2*** will take part in our eye-tracking laboratory (IMP Heidelberg), where participating  
48 couples will be comfortably seated facing each other, with a table in between serving as the  
49 eye-tracking platform. The first saliva sample will be taken after welcoming the participants.  
50 We will then calibrate the eye-tracking system. A scene camera will be placed next to the  
51 women's head/eyes to capture her gaze perspective (i.e. the view on her partner). The  
52 arrangement of all eye-tracking and related equipment is pictured in the Appendix 1. Gaze  
53  
54  
55  
56  
57  
58  
59  
60

1  
2  
3 direction and fixations points will be recorded with a TOBII XT 60 remote eye-tracking device  
4 at 60Hz, and mapped to the picture captured by the scene camera. Regions of interest are  
5 segmented into: partner's eyes, mouth, rest of the face, and off-face area.  
6

7  
8 We will then provide participants with instructions for the PSI: First, each person will receive  
9 a list of 27 standardized conversation topics, and will be asked to choose topics they wish to  
10 discuss, in whatever order is fitting for a particular couple. Topics were adopted from the  
11 Problem List (PL) used in research on relationship conflict[77], but modified so that the  
12 conversational focus is on positive, instead of negative, issues (e.g. trust, financial security,  
13 and affection). Couples will be verbally instructed to exclusively talk about positive content,  
14 to be supportive, to express compliments towards each other. As soon as couples "fall of  
15 track" of the discussion they will be asked to continue with another topic. Conversations will  
16 be videotaped and checked for protocol adherence. The experimenter will then leave the  
17 room, and participants will perform the PSI for a duration of 10 minutes. Before and after  
18 the PSI, the second and third saliva samples will be taken and couples will fill out a 9-item  
19 self-constructed scale on acute mood. During the PSI, eye-tracking data of the female  
20 partner will be continuously recorded. We will collect the fourth saliva sample 20 minutes  
21 after the PSI. During the waiting time and until discharge, participants will be asked to  
22 complete a second set of questionnaires and to return the ECG devices. Procedures and  
23 assessments are summarized in Figure 2. A participant flow chart can be found in Figure 3.  
24

25 For all salivary samples, we will utilize SaliCab tubes (RE69985 IBL International GmbH  
26 Hamburg, Germany) with the passive drool method. After collection the samples will be  
27 immediately stored at -80°C. Cortisol and  $\alpha$ -amylase will be batch assayed later at the in-  
28 house laboratory of the IMP.  
29  
30  
31  
32  
33  
34

35  
36  
37  
38  
39  
40  
41  
42  
43  
44 <insert Fig.2>  
45

#### 46 47 ***Post-intervention assessment (T2)***

48  
49 After the baseline assessment (T1) is completed, couples will be invited to participate in the  
50 training program or to continue their routine care plan for a duration of 10 weeks. After the  
51 interventional period (description see below) is completed, participants will undergo all  
52 assessments described above except for the SCID interview at T2.  
53  
54  
55  
56  
57  
58  
59  
60

### ***Follow-up assessments (FU1 & FU2)***

Two follow-up assessments (FU1 & FU2) will be conducted in both the CBCT<sup>®</sup>-fC and TAU control group. Four and twelve weeks after completion of the training (FU1: week 24-25 FU2: 33-34), the questionnaires administered at baseline will be distributed to participants online (see Table 1). In case participants are loss to follow-up, participants will be contacted and asked to state reasons they discontinued participation in order to be able analyze reasons for dropping out, and appropriate interpretation of data (including missing data).

### ***Blinding and randomization***

A portion of the study personnel will be blinded about allocation of couples to either treatment group (treatment CBCT<sup>®</sup>-fC or TAU), including the medical staff conducting the blood draw, all wet lab personnel, and all research assistants performing the eye tracking assessment. All participants will be informed about the general aims of the study. However, participants will not be informed about the operationalizations of behavioral and biological measures.

Couples will be block-randomized to either CBCT<sup>®</sup>-fC or control group using a computerized random-number generator ([www.random.org](http://www.random.org)). Blocks for each study cohort (consisting of at least 8 couples) will be randomized after recruitment and baseline assessments are completed. This randomization procedure will be repeated until the planned number of participating couples is reached. A postdoctoral researcher of the IMP, who is otherwise not involved in the proposed study, will conduct all randomization for the study. Figure 3 depicts the CONSORT flow chart[78] of the present study.

<insert Fig.3>

### ***Interventions***

All participants (including those randomized to CBCT<sup>®</sup>-fC) will receive the standard treatment (TAU) for depression. All treatments, including prescriptions, will be monitored for both groups. At a minimum this monitoring will include general practitioner care and contact with community mental health providers.



### **CBCT®-fC – Cognitively-Based Compassion Training for Couples**

CBCT® is a secular approach and was established as a structured protocol consisting of an either 6-, 8- or 10-week training program with a 1.5 to 2-hour group session weekly and daily home practice based on pre-recorded guided meditations of 7 to 20 minutes for at least three days a week.[61] In this study, we will implement a 10-week training program with 2-hour weekly sessions, including class teachings explaining and discussing the rationale of the content of each of the 6 modules, group discussions and individual and dyadic guided contemplative practices. The text of the audio-based daily home practice is standardized, and for the purpose of this study translated and audio-recorded into German by the same certified instructor who will also lead the CBCT®-fC groups (CAR).

The trainer (CAR) is a certified couple and a family therapist and is in an advanced stage of individual psychotherapy training. She is currently conducting individual psychotherapy under supervision and has already acquired clinical experience with the treatment of psychiatric and psychosomatic disorders. She is also fulfilling several training requirements, such as long-term practice of mindfulness- and compassion based meditation, under guidance of recognized supervisors and meditation teachers (LTN and others). She has also attended the CBCT® Teacher certification program at Emory University (Atlanta, USA).

For CBCT®, all human beings are considered to be endowed with a biologically-based compassion that is focused on those close to us. But as research has shown, compassion as an inner quality or skill can be trained based on the enlargement of feelings of endearment towards others and comes along with a variety of health benefits.[79] The change process described here is rooted in Tibetan-Buddhist understanding - as the training itself is based on the so called *lo-jong* tradition, which means “mind training” and is taught to cultivate compassion towards others not only close to us.

The model of how the intervention works is that change takes place in three steps: (1) starting at changing views by getting to know and to familiarize new perspectives receiving information, (2) based on that changing behavior through conviction that comes about through critical and reflective thinking, and then (3) embodied understanding takes place through thorough and repetitive, contemplative practice.

During the training process, several prerequisites and primary conditions are introduced in a stepwise manner, ultimately leading to compassion. CBCT® focuses on 6 essential key parts for the development of compassion: (1) developing attentional stability and clarity of the

1  
2  
3 mind (focused attention and meditative concentration), (2) cultivating insight into the nature  
4 of mental experience (mindfulness with the focus to train non-judgment and non-reactivity  
5 with regard to the unfolding moment-to-moment experiences), (3) cultivating self-  
6 compassion – recognizing and understanding biased cognitions and reactions and enhancing  
7 self-efficacy, (4) developing impartiality by reflecting similarities with others such as the urge  
8 for well-being and happiness overcoming fixed categorizations of others into friends,  
9 enemies and strangers, (5) developing appreciation and affection for others by  
10 acknowledging our interdependent and interconnected nature, and finally (6) developing  
11 empathy and realizing engaged compassion – as an aspirational motivation and a readiness  
12 to altruistically act if possible and if needed. [62] The intervention starts with an overview  
13 and basic instructions within the first session and end with a repetition, summary and take-  
14 home ideas for continuing practice during the last session. The first and the third module will  
15 be repeated once – resulting in a total of 10 sessions.

16  
17  
18  
19  
20  
21  
22  
23  
24  
25 The main purpose of the program is to develop compassion for oneself and others, as well as  
26 to increase compassionate responses and behaviors – particularly in the context of  
27 relationships.

28  
29  
30 For enhancement of positive reciprocity between romantic partners, several exercises and  
31 home-based practices will be introduced that are based on couple communication  
32 training,[80-84] and on the protocol of the mindfulness-based relationship  
33 enhancement[85]: a) building mindful ability to talk, b) building mindful ability to listen  
34 (without reacting initially), c) appreciation in action – indulging the partner, and d) “noticing,  
35 how the partner is doing something good for me” – gratefulness in action verbally/non-  
36 verbally. A dyadic empathy exercise will also been added, with regard to the manual of the  
37 “Cognitive Behavioral Analysis System of Psychotherapy” for chronic major depression.[56,  
38 86] Finally, the compassion meditation has been formalized as a dyadic exercise in addition  
39 to individual meditation.[87]

#### 40 41 42 43 44 45 46 47 48 49 **Possible adverse events**

50  
51 The intervention will be conducted with patients who are suffering from recurrent  
52 depressive disorder and their partners. We expect that partner may show some degree of  
53 burden and individual distress. Risks or side effects of the intervention and psychometric  
54 assessment for couples are not known. The training can trigger negative emotional states. If  
55  
56  
57  
58  
59  
60

1  
2  
3 negative states arise, they will be addressed in the group sessions, or in supplemental  
4 individual or couple therapy sessions (maximum of three additional sessions).

5  
6 The collection of a blood sample is usually associated with a very low risk. Slight pain may  
7 occur at the injection site or a bruise (blue spot) may appear which can be visible for a few  
8 days. In extremely rare cases, the formation of a blood clot (thrombosis), localized  
9 inflammation or infection at the injection site may also arise, or permanent damage to blood  
10 vessels or nerves may happen. During the blood draws, the study physician is also present to  
11 identify any complications and side effects that may occur.  
12  
13  
14  
15

### 16 17 18 ***Treatment as usual (TAU)***

19  
20 Couples assigned to the TAU group will start (or continue) with TAU which will consist of  
21 receiving medical treatment and primary health care, or waiting for starting individual  
22 therapy (average waiting time 3 months.[88] They will be asked to maintain their treatment  
23 plan during the study period of 10 weeks. Patients who start participating in regular  
24 psychotherapy treatment during the study period will be excluded from the analysis. All  
25 participants in the TAU group will be offered to participate in a CBCT®-fC after the end of  
26 study (i.e. after the second follow-up).  
27  
28  
29  
30  
31

### 32 33 34 ***Adherence***

35  
36 Couples' compliance with the CBCT®-fC meditations and exercises will be assessed with pen  
37 and paper questionnaires after each weekly in-house session using Therapeutic Presence  
38 Inventory[89] (TPI, modified for the study), Practice Quality[90](PQ-M, adapted version of  
39 the Practice Quality-Mindfulness) and the Scale for the Multiperspective Assessment of  
40 General Change Mechanisms in Psychotherapy (SACIP).[91] The CBCT®-fC group will receive  
41 one text message four times weekly during the ten-week period. This message will serve as a  
42 reminder for the meditation practice and home-based exercises, and will also capture which  
43 meditations or practices participants completed, and how long they practiced. Participants  
44 will be asked to indicate reasons for non-performance. Participants' emotional status will  
45 also be assessed via the Positive and Negative Affect Schedule (PANAS).[92]  
46  
47  
48  
49  
50  
51

52 The TAU control group will receive one text message per week during the same time period  
53 asking to indicate their emotional status.  
54  
55  
56  
57  
58  
59  
60

## Primary outcome

The primary outcome for the study is the reduction of depressive symptoms from baseline to post-intervention, which will be measured with the HDRS observer-based rating instrument. The HDRS is a standardized rating scale that contains 21 items, scoring on 2- to 5-point scales, and will be administered twice throughout the study: at baseline and post-intervention.

Psychometric properties are adequate with the internal consistency varying from 0.73 to 0.91.[93]

## Secondary outcomes

### *Self-rated depressive symptoms*

In addition to the 21-item HDRS observer-based rating we will also monitor changes in self-rated depression via the BDI-II at four measurement times (baseline, post-intervention, follow-up I and II). The BDI-II is a standardized questionnaire comprising 21 items, with scoring on a 0-3 scale. The internal consistency varies from 0.89 to 0.93 and the retest reliability ranged from 0.80 to 0.82.[94]

### *Eye tracking during the Positive Social Interaction Paradigm (PSI)*

During the interaction task (PSI), the female partner's eye movements will be monitored with a remote eye tracker (Tobii X2-60, sampling rate 60Hz) at T1 and T2. Total gaze duration in milliseconds will be assessed via real-time eye-tracking during a standardized PSI with the romantic partner. Raw coordinates of gaze and fixation will be mapped to the following predefined areas of interest: 1. eyes, 2. mouth, 3. other regions of the face, and 4. off face. In this study, we interpret eye-tracking data as an objective proxy for social cognition processes with regard to emotion-related information processing biases. We expect that randomization to CBCT®-fC will result in increased maintenance of gaze towards the partner's face during the instructed interaction, and thus, in a reduction of the social information processing biases accompanying the disorder.

### *Cortisol & $\alpha$ -Amylase*

Cortisol and  $\alpha$ -Amylase will be collected as stress-sensitive biomarkers in sampling tubes for collection of saliva samples (RE69985 IBL International GmbH Hamburg, Germany) at four

1  
2  
3 time-points (-20min, pre-post, +20min relative to PSI) at T1 and T2. The samples will be  
4 stored at -80°C and analyzed in the in-house laboratory of the IMP, Heidelberg, Germany.  
5  
6 This data will be analyzed using area under the curve (AUC) approach[95], comparing  
7  
8 changes over time between the two study arms. We expect participants in the experimental  
9  
10 group to experience a reduction in HPA- and SAM-axis reactivity during the PSI after the  
11  
12 intervention.

### 13 14 15 ***IL-1 $\beta$ & IL6***

16 IL-1 $\beta$  and IL-6 will be measured in blood samples on lab day 1 at T1 and T2. The samples will  
17  
18 be stored at -80°C at the in-house lab, and will then be sent to the Central Laboratory at  
19  
20 Heidelberg University, where they will be processed by standard means (i.e. high-sensitivity  
21  
22 enzyme-linked immunosorbent assay). We expect CBCT<sup>®</sup>-fC to result in a reduction of the  
23  
24 concentration level of both of the two pro-inflammatory cytokines in both members of a  
25  
26 couple.

### 27 28 29 ***Autonomic function (ECG)***

30 An ECG will be assessed with a one-lead ambulatory monitor (eMotion FAROS 180° Mega  
31  
32 Electronics Ltd. Kuopio Finland) sampling at 1000Hz for 24-hour recording at T1 and T2. Each  
33  
34 individual will receive the monitor for 24h (attached with a chest belt) prior to the PSI, and  
35  
36 until the end of the PSI assessment on the second day. Participants will be instructed in the  
37  
38 handling of the device. The 24h ECG recording will be segmented in 5 minutes intervals as  
39  
40 recommended by the Task Force Guidelines for HRV assessment.[96] Beat-to-beat variation  
41  
42 in the heart rate is mainly controlled by the ANS and permits determination of the relative  
43  
44 contributions of sympathetic and parasympathetic activity underlying autonomic control of  
45  
46 the heart. Here, rapid fluctuations in HR are due to vagal activity, while slower HR changes  
47  
48 are a result of mixed influence of sympathetic (non-vagal) and parasympathetic activity. The  
49  
50 following parameters will be derived for each segment using the software package  
51  
52 "RHRV":[97] 1. Root mean square of successive differences (RMSSD), 2. successive normal-  
53  
54 to-normal (NN) intervals that differ by more than 50msec (NN50), 3. the proportion of NN50  
55  
56 divided by total number of NNs (PNN50) indexing the rapid changes in HR and therefore  
57  
58 vagal activity, and 4. the standard deviation of NN intervals (SDNN) with a resulting RR time  
59  
60 series indexing mixed sympathetic and parasympathetic activity. ECG recordings will

1  
2  
3 continue during the PSI, enabling us to analyze ANS reactivity to the interaction paradigm.  
4 We expect a stronger parasympathetic response to PSI after participation in CBCT®-fC.

5  
6 In an exploratory analysis, a two-stage approach will be used to estimate circadian variation  
7 parameters of cardiac autonomic function over a 24h period. Set in 2009 by the Research  
8 Domain Criteria initiative (RDoC) from the National Institute of Mental Health, a primary goal  
9 is to develop a classification system for mental health disorders, linking dimensions of  
10 psychopathology to neurobiological systems, including alterations in circadian rhythms.[98]  
11 For the current study, a candidate system that might match these criteria is the central  
12 autonomic network (CAN). The CAN is widely involved in socio-emotional regulatory  
13 processes.[99, 100] This network includes cortical components such as the medial, the  
14 prefrontal, the anterior cingulate, and the insular cortex as well as several nuclei such as the  
15 paraventricular nucleus and the amygdala. The network is linked to the peripheral nervous  
16 system via the vagus nerve. In responses to emotional significant stimuli, autonomic output  
17 is modulated via the anterior cingulate cortex and its projections to the prefrontal cortex,  
18 amygdala, hypothalamus and brainstem.[101, 102] Signals are transferred via the stellate  
19 ganglia and the vagus nerve to the sinoatrial node of the heart and modulates the heart rate.  
20 Therefore, activity in the neural structures involved in affective and autonomic regulation  
21 can be indexed noninvasively by measures of peripheral cardiac autonomic modulations, i.e.  
22 vmHRV.[103-105]

23  
24 Trigonometric regression models with ordinary least square estimations will be applied to  
25 each 24h period of 5 minute segments, to estimate three individual level cosine function  
26 parameters, to capture individual circadian variation patterns in the time series of the  
27 following RMSSD segments: 1. MESOR (Midline Estimating Statistic Of Rhythm) defined as  
28 the rhythm adjusted 24h mean fitted to the data, 2. amplitude, defined as the distance  
29 between MESOR and the maximum of the cosine curve (i.e. half the extent of rhythmic  
30 change in a cycle), and 3) acrophase, defined as the phase shift of amplitude from a given  
31 reference time point when the highest oscillation is reached (i.e. time lag).[106] This is  
32 assumed to be 24-hour period after visual inspection.[for a more detailed explanation of  
33 underlying mathematics see 107] In a second step, these individual cosine function  
34 parameters will be forwarded as dependent variables to multivariate multiple regression  
35 models for simultaneous effect estimation of CBCT®-fC on the circadian recovery profile of  
36 vagal activity. We will reduce alpha error by using a single regression model with

1  
2  
3 simultaneous estimation of more than one outcome variable. We expect an increase in  
4 MESOR and Amplitude post training.  
5  
6  
7

### 8 ***Epigenetics - SLC6A4 and OXTR***

9  
10 The serotonin transporter gene SLC6A4 and the oxytocin receptor gene (OXTR) will be  
11 measured in blood samples on lab day 1 at T1 and T2. The PAXgene Blood RNA tubes are  
12 incubated at room temperature so that stabilizers in the tubes can become effective. The  
13 samples will be stored at -80°C at the in-house lab and will then be sent to a certified  
14 laboratory, where they will be processed by standard means. We expect CBCT®-fC to result  
15 in an alteration of the methylation pattern of both of the genes, focusing on specific CpG-  
16 sites in their promoter-regions.  
17  
18  
19  
20  
21  
22

### 23 **Statistical analysis and missing data**

24  
25 All outcome data incorporating repeated observations (nested within individuals) will be  
26 analyzed within 2-level hierarchical linear modeling. Repeated measures of the outcomes  
27 (e.g. 4 observations for the primary outcome, BDI-II) will be modeled as level-1 variables.  
28 Group assignment (CBCT®-fC vs. TAU) will be regarded as a level-2 predictor (individual  
29 level), and the cross-level interaction will be tested for significant influence on the individual  
30 trajectories. Dependent variables that are measured simultaneously for both patients and  
31 their partner (e.g. stress measures) will be analyzed to determine dependencies within a  
32 couple e.g. by treating the dyad as a third hierarchy level. Type-I error probability will be set  
33 at  $\alpha = .05$  for all tests. Data based on an intention-to-treat approach will be compared to a  
34 completers-only dataset in the course of sensitivity analyses. Several strategies will be used  
35 to minimize the likelihood of missing data. We will clearly explain to couples what their  
36 efforts will be for the study before they agree to participate. We will also support couples by  
37 proactively manage their appointments of the pre-post assessments and other study  
38 requirements by sending reminder emails, texts, and by making reminder phone calls.  
39 Training sessions will be offered in the evenings with a flexible start (between groups), to  
40 meet the needs of each training group. Completeness of questionnaire data will be closely  
41 monitored to avoid missing questionnaires. Participants will fill in their questionnaires at the  
42 IMP using a tablet PC. Study personnel will be available in the event of any questions or  
43  
44  
45  
46  
47  
48  
49  
50  
51  
52  
53  
54  
55  
56  
57  
58  
59  
60

1  
2  
3 technical issues. Biomarker sampling will be monitored using standardized checklists, and we  
4 will note missing specimens as well as the reasons for their not being available.

5  
6 Patient drop-outs from the training will be closely monitored and reasons for leaving the  
7 study before the end of the protocol will be assessed to distinguish study-related reasons for  
8 attrition compared to other reasons, and to improve study procedures.  
9  
10

### 11 12 13 **Sample size**

14 Power calculations were adapted for repeated-measures analysis of variance (ANOVA)  
15 enabling us to calculate the required sample size with G\*Power.[108] As multilevel modeling  
16 offers enhanced statistical power over a common ANOVA approach, the sample size  
17 calculated represents a conservative estimate. Power calculations are based on findings  
18 from[109] The authors investigated the effects of a mindfulness-based cognitive therapy for  
19 depressed patients within a large-scale RCT and found a medium sized effect of  $d = 0.53$   
20 standard deviations compared to a TAU condition on the HDRS (i.e. the primary outcome of  
21 our study). Assuming a similar medium-sized effect ( $f = .25$ ) when comparing CBCT®-fC to  
22 TAU from pre-to-post intervention, power analysis with G\*Power suggests a required sample  
23 size of  $N = 40$  ( $(1-\beta) = .80, \rho = .40$ ). To accounting for a ~20% drop-out, we plan to randomize  
24  $N = 50$  couples into the study.  
25  
26  
27  
28  
29  
30  
31  
32  
33

### 34 35 **Data monitoring**

36 All training sessions will be videotaped and a selection will be reviewed by senior  
37 researchers. All PSI sessions will be videotaped and reviewed to ensure couples compliance  
38 to the PSI protocol. The laboratory sessions will be documented on checklists and reviewed  
39 by the senior staff. An experienced statistician will review all statistical analyses.  
40  
41  
42  
43  
44  
45

### 46 47 **Discussion**

48 The SIDE study is the first investigation to examine multilevel effects of a compassion-based  
49 training program for couples with the female partner suffering from depression. The  
50 assessment protocol will allow for a comprehensive evaluation of naturalistic real-time  
51 interaction of romantic partners, and for an integrative analysis of underlying biomarker  
52 change. In combination with self-report assessments and observer-based standard scales,  
53  
54  
55  
56  
57



our approach will enable us to advance the knowledge of the bio-psycho-social processes involved in etiology, progression and treatment of depressive disorders.[110]

Recent data suggests that depressed patients benefit less from the stress-reducing effects of positive social interactions and high-quality relationships than healthy individuals, both in a psychological and a biological way. Among others, social cognition processes and several markers of stress-physiology and immune-responses such as cortisol, alpha-amylase, cytokine IL-6, and IL-1 $\beta$ , and vmHRV as well as epigenetic marks (SLC6A4 and OXTR) might be altered while couples are instructed to positively interact with each other. Whether depressed female patients also display less active positive behavior and an altered psychobiological response in real-time interaction remains to be examined.

With the SIDE study, we intend to address four innovative aspects of effectiveness research. First, the SIDE study will complement earlier preliminary evidence on the effects of CBCT<sup>®</sup> on clinical improvements,[67, 111-114] by addressing research gaps concerning the associations between compassion and depression. Second, and related to first point, specific aspects of the group intervention for enhancement of mindfulness and compassion on psychobiological concomitants will be elucidated. Third, the results will provide additional therapeutic tools to target a powerful mediator of health – the social relationship. Fourth, the male partner will be included in the group-based training taking into account his burden and addressing his needs, and thereby increase the chance for a better integration of interactional (ex)changes in daily routine.

### **Possible limitations**

Although comparison with the TAU control group impedes the drawing of conclusions about the specificity of CBCT<sup>®</sup>-fC over and above non-specific therapeutic factors, differences in measures of the extend of individuals' engagement in home practice (i.e. time) may give some indications in that regard. Importantly, the training is thought to complement rather than to replace individual therapy. Therefore, we are particularly interested if the TAU plus CBCT<sup>®</sup>-fC group improves with regard to the treatment outcomes via increased social functioning and reduced depressive and distress symptoms. In addition, both groups will have comparable TAU conditions and thus benefit from non-specific therapeutic factors, such as the therapeutic relationship and peer support. Furthermore, we will investigate the degree of active involvement with regard to the mindfulness and compassion meditations

1  
2  
3 and dyadic exercises – both in-sessions and at home practice; allegiance will be controlled  
4 for potential bias effects.  
5  
6  
7

## 8 **Declarations**

### 9 **Ethics, consent and permissions**

10 Participants will be informed according to the Declaration of Helsinki. Medical staff will  
11 adhere to the professional code of conduct for doctors in Baden-Württemberg, Germany.  
12 Study participation is completely voluntary. Detailed written and oral information on study  
13 aims, procedure, benefits and risks will be provided. After written informed consent, eligible  
14 participants will be enrolled. Full participation in the study assessments will be financially  
15 compensated. The IMP will fully cover costs for the CBCT®-fC. Ethical approval has been  
16 obtained from the ethics committee of the Medical School Heidelberg, Heidelberg  
17 University, Germany (S-021/2016). In case any changes have to be made with regard to the  
18 study protocol, these will be communicated with the ethics committee.  
19  
20  
21  
22  
23  
24  
25  
26  
27  
28

### 29 **Availability of data and material**

30 Research data will be made available for future research by other researchers anonymously  
31 via the Competence Centre for Research Data (Heidelberg University) using the platform  
32 heiDATA (the university's research data repository) in line with its Research Data Policy  
33 adopted by Heidelberg University: <http://www.data.uni-heidelberg.de/services.html>.  
34 Confidential information of all participants is subject to data protection. Data will only be  
35 passed on to third parties in a de-identified format (i.e. all protected health information  
36 removed).  
37  
38  
39  
40  
41  
42  
43

### 44 **Competing interests**

45 The authors declare that they have neither competing interests nor conflict of interest.  
46  
47  
48

### 49 **Funding**

50 The study is mainly funded by the Institute of Medical Psychology, University Hospital  
51 Heidelberg, and partly by the Mind and Life Organization as well as by the Deutsche  
52 Gesellschaft für Systemische Therapie, Beratung und Familientherapie. Further funding is  
53 pending.  
54  
55  
56  
57  
58  
59  
60

### Author's contributions

CAR and MNJ drafted the first version of the manuscript sharing the first authorship as they contributed equally. MT and JB supported this process. BD, LTN, TH and TWWP delivered feedback on a first version of the paper – LTN and TH focusing especially on the CBCT®-fC part. CAR, MNJ, MW and TWWP critically revised the second version of the manuscript for important intellectual content with regard to psychobiological assessments, and additionally TWWP did the English copyediting. While revising the manuscript, MS was engaged specifically with rewriting the parts on epigenetics. CAR, MNJ and BD contributed to the design of the study. All authors have approved the final version of the manuscript.

### Acknowledgments

We would like to acknowledge the Mind and Life Institute providing financial support in part for the preparation phase in form of the Francisco J. Varela Award, which Dr. Aguilar-Raab received in order to modify and extend the CBCT® protocol to suit couples in close collaboration with experts in the field. Furthermore, we thank the Institute for Medical Psychology, University Hospital Heidelberg and staff members for providing financial and infrastructural support. Marc N. Jarczok and Marco Warth are supported by the Physician-Scientist-Program of the Medical Faculty at Heidelberg University. We would also like to express our gratitude to all members of the laboratory and study staff who take care of the patient interviews and are involved in carrying out the surveys and interventions. We finally would like to acknowledge financial support by Deutsche Forschungsgemeinschaft and Ruprecht-Karls-Universität Heidelberg within the funding programme Open Access Publishing.

**Table 1** Overview of measures

| Short Name                               | Full Name                                                                    | Pre-Treatment (CBCT®-fC vs. TAU) | Post-Treatment (CBCT®-fC vs. TAU) | Comments                                                            |
|------------------------------------------|------------------------------------------------------------------------------|----------------------------------|-----------------------------------|---------------------------------------------------------------------|
| <b>Primary outcomes</b>                  |                                                                              |                                  |                                   |                                                                     |
| HDRS                                     | Hamilton Depression Rating Scale[74]                                         | <                                | X                                 |                                                                     |
| BDI-II                                   | Beck Depression Inventory[75]                                                | X                                | X                                 |                                                                     |
| <b>Secondary outcomes</b>                |                                                                              |                                  |                                   |                                                                     |
| BSSS                                     | Berliner Social Support Scales[115]                                          | X                                | X                                 |                                                                     |
| CLS                                      | Compassionate Love Scale[116]                                                | X                                | X                                 |                                                                     |
| EQ                                       | Empathy Quotient                                                             | X                                | X                                 |                                                                     |
| EVOS                                     | Evaluation of Social Systems Scale[117, 118]                                 | X                                | X                                 |                                                                     |
| UCLA-LS                                  | UCLA-Loneliness-Scale[119] (German version: Hamburger Einsamkeitsskala[120]) | X                                | X                                 |                                                                     |
| KIMS                                     | Kentucky Inventory of Mindfulness Skills[121, 122]                           | X                                | X                                 |                                                                     |
| PBD                                      | Partner Burden in Depression (constructed in relation to the PHQ-9)          | X                                | X                                 | For male partners only                                              |
| PFB                                      | Partnership Questionnaire[123]                                               | X                                | X                                 |                                                                     |
| PHQ-9                                    | Patient Health Questionnaire[124, 125]                                       | X                                | X                                 |                                                                     |
| RAS (Item 2)                             | Second Item from the Relationship Assessment Scale[53, 126]                  | X                                | X                                 |                                                                     |
| SCS                                      | Self Compassion Scale[71, 127]                                               | X                                | X                                 |                                                                     |
| TICS                                     | Trier Inventory for chronic Stress[128]                                      | X                                | X                                 |                                                                     |
| <b>Characteristics &amp; Confounders</b> |                                                                              |                                  |                                   |                                                                     |
| CLE                                      | Critical Life Events                                                         | X                                | X                                 |                                                                     |
| CTQ                                      | Childhood Trauma Questionnaire[129]                                          | X                                |                                   |                                                                     |
| IIP                                      | Inventory of Interpersonal Problems[130, 131]                                | X                                |                                   |                                                                     |
| SCID                                     | The Structured Clinical Interview for DSM-IV Axis I Disorders[131, 132]      | X                                |                                   |                                                                     |
| Démographie questionnaire                | e.g.: Nationality, household characteristics, etc.                           | X                                | X                                 | Gynecological questions for women (e.g. pregnancy, menopause, etc.) |
| <b>Checklists</b>                        |                                                                              |                                  |                                   |                                                                     |
| Checklist for blood samples              | e.g: medication in the last 24h, Alcohol, etc.                               | X                                | X                                 |                                                                     |
| Checklist for ECG                        | e.g.: quality of sleep, pain, etc.                                           | X                                | X                                 |                                                                     |
| Checklist for Saliva sample              | e.g: medication in the last 24h, Alcohol, etc.                               | X                                | X                                 |                                                                     |

1  
2  
3 **Figure captions**  
4  
5

6 **Fig. 1** Study Design.  
7

8 PSI = Positive Social Interaction; TAU = Treatment as usual; CBCT<sup>®</sup>-fC = Cognitively-Based  
9 Compassion Training for Couples; T1 = measurement point 1 (baseline); T2 = measurement  
10 point 2 (post intervention); FU1/2 = follow-up 1 and 2  
11  
12  
13

14  
15 **Fig. 2** Assessments.  
16

17 PSI = Positive Social Interaction, ECG = electrocardiogram, CVP = circadian variation pattern,  
18 HRV = heart rate variability, IL = interleukin  
19  
20

21  
22 **Fig. 3** Flow diagram.  
23

24 HDRS = Hamilton Depression Rating Scale, BDI = Beck Depression Inventory, SCID =  
25 Structured Clinical Interview for DSM, ECG = electrocardiogram, PSI = positive social  
26 interaction, CBCT<sup>®</sup>-fC = Cognitively-Based Compassion Training for Couples, TAU =  
27 Treatment as usual, TPI = Therapeutic Presence Inventory, PQ = Practice Quality, SACiP =  
28 Scale for the Multiperspective Assessment of General Change Mechanisms in Psychotherapy  
29  
30  
31  
32  
33  
34  
35  
36  
37  
38  
39  
40  
41  
42  
43  
44  
45  
46  
47  
48  
49  
50  
51  
52  
53  
54  
55  
56  
57  
58  
59  
60

### Abbreviations

AUC: Area under the Curve; BDI-II: Beck Depression Inventory; CAN: Central Autonomic Network; CBCT<sup>®</sup>-fC: CBCT<sup>®</sup> for Couples; CpG: Cytosin-phosphatidyl-Guanin sites; HDRS: Hamilton Depression Rating Scale; HPA: hypothalamic-pituitary-adrenal; NIMH: National Institute of Mental Health; OXTR: oxytocin receptor gene; PANAS: Positive and Negative Affect Schedule; PC: patient couple; PNN50: proportion of NN50 divided by total number of NNS; PQ-M: Practice Quality-Mindfulness; PSI: positive social interaction; RCT: randomized controlled trial; RMSSD: root mean square of successive differences; sAA: saliva alpha-amylase; SACiP: Scale for the Miltiperspective Assessment of General Change Mechanisms in Psychotherapy; SAM: sympatho-adreno-medullary; SCID: Structured Clinical Interview for DSM; SDNN: standard deviation of NN intervals; SLC6A4: serotonin transporter gene; TAU: Treatment As Usual; TPI: Therapeutic Presence Inventory; vmHRV: vagally mediated heart rate variability

## References

1. Kessler RC, Bromet EJ. The epidemiology of depression across cultures. *Annu Rev Public Health* 2013;34:119-38. doi: 10.1146/annurev-publhealth-031912-114409
2. Carney RM, Freedland KE, Veith RC. Depression, the autonomic nervous system, and coronary heart disease. *Psychosom Med* 2005;67 (1):S29-33. doi: 10.1097/01.psy.0000162254.61556.d5
3. Vaillant GE, Mukamal K. Successful aging. *Am J Psychiatry* 2001;158(6):839-47. doi: 10.1176/appi.ajp.158.6.839
4. Beach S, Wamboldt MZ, Kaslow N, et al. Relational processes and DSM-V: Neuroscience, assessment, prevention, and treatment. Arlington, VA: American Psychiatric Association Press 2006.
5. Holt-Lunstad J. Why social relationships are important for physical health: A systems approach to understanding and modifying risk and protection. *Annu Rev Psychol* 2018;69:437-58. doi: 10.1146/annurev-psych-122216-011902 [published Online First: 2017/10/17]
6. Ditzen B, Heinrichs M. Psychobiology of social support: the social dimension of stress buffering. *Restorative neurology and neuroscience* 2014;32(1):149-62. doi: 10.3233/rnn-139008 [published Online First: 2013/04/23]
7. Robles TF, Slatcher RB, Trombello JM, et al. Marital quality and health: A meta-analytic review. *Psychol Bull* 2014;140(1):140-87. doi: 10.1037/a0031859
8. Hirschfeld RM, Montgomery SA, Keller MB, et al. Social functioning in depression: a review. *J Clin Psychiatry* 2000;61(4):268-75.
9. Fink BC, Shapiro AF. Coping mediates the association between marital instability and depression, but not marital satisfaction and depression. *Couple Family Psychol* 2013;2(1):1-13. doi: 10.1037/a0031763
10. Rehman US, Gollan J, Mortimer AR. The marital context of depression: research, limitations, and new directions. *Clin Psychol Rev* 2008;28(2):179-98. doi: 10.1016/j.cpr.2007.04.007
11. Overall NC, Hammond MD. Biased and accurate: depressive symptoms and daily perceptions within intimate relationships. *Pers Soc Psychol Bull* 2013;39(5):636-50. doi: 10.1177/0146167213480188
12. Kupferberg A, Hager OM, Fischbacher U, et al. Testing the social competition hypothesis of depression using a simple economic game. *BJPsych Open* 2016;2(2):163-69. doi: 10.1192/bjpo.bp.115.001362
13. Armstrong T, Olatunji BO. Eye tracking of attention in the affective disorders: a meta-analytic review and synthesis. *Clin Psychol Rev* 2012;32(8):704-23. doi: 10.1016/j.cpr.2012.09.004
14. Joormann J, Gotlib IH. Selective attention to emotional faces following recovery from depression. *J Abnorm Psychol* 2007;116(1):80-5. doi: 10.1037/0021-843X.116.1.80
15. Sears C, Newman K, Ference J, et al. Attention to emotional images in previously depressed individuals: An eye-tracking study. *Cognit Ther Res* 2011;35(6):517-28. doi: 10.1007/s10608-011-9396-5
16. Herbert J. Cortisol and depression: three questions for psychiatry. *Psychol Med* 2013;43(3):449-69. doi: 10.1017/S0033291712000955
17. Burke HM, Davis MC, Otte C, et al. Depression and cortisol responses to psychological stress: a meta-analysis. *Psychoneuroendocrinology* 2005;30(9):846-56. doi: 10.1016/j.psyneuen.2005.02.010
18. Booij SH, Bos EH, Bouwmans ME, et al. Cortisol and alpha-amylase secretion patterns between and within depressed and non-depressed individuals. *PLoS One* 2015;10:e0131002.
19. Schumacher S, Kirschbaum C, Fydrich T, et al. Is salivary alpha-amylase an indicator of autonomic nervous system dysregulations in mental disorders? A review of preliminary findings and the interactions with cortisol. *Psychoneuroendocrinology* 2013;38(6):729-43. doi: 10.1016/j.psyneuen.2013.02.003

- 1  
2  
3 20. Kemp AH, Quintana DS. The relationship between mental and physical health: insights from the  
4 study of heart rate variability. *Int J Psychophysiol* 2013;89(3):288-96. doi:  
5 10.1016/j.ijpsycho.2013.06.018
- 6 21. Miller AH, Raison CL. The role of inflammation in depression: from evolutionary imperative to  
7 modern treatment target. *Nat Rev Immunol* 2016;16(1):22-34. doi: 10.1038/nri.2015.5
- 8 22. Kang HJ, Kim JM, Stewart R, et al. Association of SLC6A4 methylation with early adversity,  
9 characteristics and outcomes in depression. *Prog Neuropsychopharmacol Biol Psychiatry*  
10 2013;44:23-8. doi: 10.1016/j.pnpbp.2013.01.006 [published Online First: 2013/01/22]
- 11 23. Holsboer F. The corticosteroid receptor hypothesis of depression. *Neuropsychopharmacology*  
12 2000;23(5):477-501. doi: 10.1016/S0893-133X(00)00159-7
- 13 24. Palazidou E. The neurobiology of depression. *Br Med Bull* 2012;101(1):127-45. doi:  
14 10.1093/bmb/lds004
- 15 25. Morris MC, Compas BE, Garber J. Relations among posttraumatic stress disorder, comorbid major  
16 depression, and HPA function: a systematic review and meta-analysis. *Clin Psychol Rev*  
17 2012;32(4):301-15. doi: 10.1016/j.cpr.2012.02.002
- 18 26. Stetler C, Miller GE. Depression and hypothalamic-pituitary-adrenal activation: A quantitative  
19 summary of four decades of research. *Psychosom Med* 2011;73(2):114-26. doi:  
20 10.1097/PSY.0b013e31820ad12b
- 21 27. Bagley SL, T.L. W, T.W. B. Sex differences in physiological and affective responses to stress in  
22 remitted depression. *Physiol Behav* 2011;104(2):180-86. doi: 10.1016/j.physbeh.2011.03.004
- 23 28. Tanaka Y, Ishitobi Y, Maruyama Y, et al. Salivary alpha-amylase and cortisol responsiveness  
24 following electrical stimulation stress in major depressive disorder patients. *Prog*  
25 *Neuropsychopharmacol Biol Psychiatry* 2012;36:220-4.
- 26 29. Bosch JA, Veerman EC, de Geus EJ, et al. Alpha-amylase as a reliable and convenient measure of  
27 sympathetic activity: Don't start salivating just yet! *Psychoneuroendocrinology* 2011;36:449-  
28 53.
- 29 30. Nater UM, Rohleder N. Salivary alpha-amylase as a non-invasive biomarker for the sympathetic  
30 nervous system: current state of research. *Psychoneuroendocrinology* 2009;34(4):486-96.  
31 doi: 10.1016/j.psyneuen.2009.01.014
- 32 31. Rohleder N, Chen E, Wolf JM, et al. The psychobiology of trait shame in young women: Extending  
33 the social self preservation theory. *Health Psychol* 2008;27(5):523-32. doi: 10.1037/0278-  
34 6133.27.5.523
- 35 32. Verkuil B, Brosschot JF, Marques AH, et al. Gender differences in the impact of daily sadness on  
36 24-h heart rate variability. *Psychophysiology* 2015;52:1682-8.
- 37 33. Jarczok MN, Aguilar-Raab C, Koenig J, et al. The heart's rhythm 'n' blues: Sex differences in  
38 circadian variation patterns of vagal activity vary by depressive symptoms in predominantly  
39 healthy employees. *Chronobiol Int* 2018 doi: 10.1080/07420528.2018.1439499
- 40 34. Jarczok MN, Koenig J, Shively CA, et al. Behavioral depression is associated with increased vagally  
41 mediated heart rate variability in adult female cynomolgus monkeys (*Macaca fascicularis*). *Int*  
42 *J Psychophysiol* 2017;Epub ahead of print doi: 10.1016/j.ijpsycho.2017.11.004
- 43 35. Maletic V, Robinson M, Oakes T, et al. Neurobiology of depression: an integrated view of key  
44 findings. *Int J Clin Pract* 2007;61(12):2030-40. doi: 10.1111/j.1742-1241.2007.01602.x
- 45 36. Pace TWW, Mletzko TC, Alagbe O, et al. Increased stress-induced inflammatory responses in male  
46 patients with major depression and increased early life stress. *Am J Psychiatry*  
47 2006;163(9):1630-3. doi: 10.1176/appi.ajp.163.9.1630
- 48 37. Raison CL, Capuron L, Miller AH. Cytokines sing the blues: Inflammation and the pathogenesis of  
49 depression. *Trends Immunol* 2006;27(1):24-31. doi: 10.1016/j.it.2005.11.006
- 50 38. Menke A, Binder EB. Epigenetic alterations in depression and antidepressant treatment.  
51 *Dialogues Clin Neurosci* 2014;16(3):395-404.
- 52 39. Alasaari JS, Lagus M, Ollila HM, et al. Environmental stress affects DNA methylation of a CpG rich  
53 promoter region of serotonin transporter gene in a nurse cohort. *PLoS One*  
54 2012;7(9):e45813. doi: 10.1371/journal.pone.0045813 [published Online First: 2012/10/03]
- 55  
56  
57  
58  
59  
60



- 1  
2  
3 40. Klengel T, Pape J, Binder EB, et al. The role of DNA methylation in stress-related psychiatric  
4 disorders. *Neuropharmacology* 2014;80:115-32. doi: 10.1016/j.neuropharm.2014.01.013  
5 [published Online First: 2014/01/24]
- 6 41. Voisey J, Young RM, Lawford BR, et al. Progress towards understanding the genetics of  
7 posttraumatic stress disorder. *J Anxiety Disord* 2014;28(8):873-83. doi:  
8 10.1016/j.janxdis.2014.09.014
- 9 42. Jack A, Connelly JJ, Morris JP. DNA methylation of the oxytocin receptor gene predicts neural  
10 response to ambiguous social stimuli. *Front Hum Neurosci* 2012;6:1-7. doi:  
11 10.3389/fnhum.2012.00280
- 12 43. Walum H, Lichtenstein P, Neiderhiser JM, et al. Variation in the oxytocin receptor gene (OXTR) is  
13 associated with pair-bonding and social behavior. *Biol Psychiatry* 2012;71(5):419-26. doi:  
14 10.1016/j.biopsych.2011.09.002
- 15 44. Woods R, Bedard M, McQuaid RJ, et al. Rejection sensitivity and multiple group memberships:  
16 The moderating role of an oxytocin receptor gene polymorphism. *Soc Neurosci* 2017:1-9. doi:  
17 10.1080/17470919.2017.1327458 [published Online First: 2017/05/06]
- 18 45. Booij L, Szyf M, Carballido A, et al. DNA methylation of the serotonin transporter gene in  
19 peripheral cells and stress-related changes in hippocampal volume: A study in depressed  
20 patients and healthy controls. *PLoS One* 2015;10(3):e0119061. doi:  
21 10.1371/journal.pone.0119061
- 22 46. Sugawara H, Bundo M, Asai T, et al. Effects of quetiapine on DNA methylation in neuroblastoma  
23 cells. *Prog Neuropsychopharmacol Biol Psychiatry* 2015;56:117-21. doi:  
24 10.1016/j.pnpbp.2014.08.010
- 25 47. Zannas AS, West AE. Epigenetics and the regulation of stress vulnerability and resilience.  
26 *Neurosci* 2014;264:157-70. doi: 10.1016/j.neuroscience.2013.12.003
- 27 48. Szyf M, Tang YY, Hill KG, et al. The dynamic epigenome and its implications for behavioral  
28 interventions: a role for epigenetics to inform disorder prevention and health promotion.  
29 *Transl Behav Med* 2016;6(1):55-62. doi: 10.1007/s13142-016-0387-7
- 30 49. Roberts S, Lester KJ, Hudson JL, et al. Serotonin transporter methylation and response to cognitive  
31 behaviour therapy in children with anxiety disorders. *Transl Psychiatry* 2014;4:e444. doi:  
32 10.1038/tp.2014.83
- 33 50. Zhao J, Goldberg J, Bremner JD, et al. Association between promoter methylation of serotonin  
34 transporter gene and depressive symptoms: A monozygotic twin study. *Psychosom Med*  
35 2013;75:523-29. doi: 0033-3174/13/7506Y0523
- 36 51. Shapiro SL, Carlson LE, Astin JA, et al. Mechanisms of mindfulness. *J Clin Psychol* 2006;62(3):373-  
37 86. doi: 10.1002/jclp.20237
- 38 52. Kabat-Zinn J. Full catastrophe living: Using the wisdom of your mind and body to face stress, pain,  
39 and illness. New York: Delacorte 1990.
- 40 53. Bishop SR, Lau M, Shapiro S, et al. Mindfulness: A proposed operational definition. *Clin Psychol Sci*  
41 *Pract* 2004;11:230-41.
- 42 54. Grossman P, Niemann L, Schmidt S, et al. Mindfulness-based stress reduction and health benefits.  
43 A meta-analysis. *J Psychosom Res* 2004;57(1):35-43. doi: 10.1016/S0022-3999(03)00573-7
- 44 55. Kabat-Zinn J. Mindfulness-Based interventions in context: Past, present, and future. *Clin Psychol*  
45 *Sci Pract* 2003;10(2):144-56. doi: 10.1093/clipsy.bpg016
- 46 56. Michalak J, Schultze M, Heidenreich T, et al. A randomized controlled trial on the efficacy of  
47 mindfulness-based cognitive therapy and a group version of cognitive behavioral analysis  
48 system of psychotherapy for chronically depressed patients. *J Consult Clin Psychol*  
49 2015;83(5):951-63. doi: 10.1037/ccp0000042
- 50 57. Keng SL, Smoski MJ, Robins CJ. Effects of mindfulness on psychological health: A review of  
51 empirical studies. *Clin Psychol Rev* 2011;31(6):1041-56. doi: 10.1016/j.cpr.2011.04.006
- 52 58. Nila K, Holt DV, Ditzen B, et al. Mindfulness-based stress reduction (MBSR) enhances distress  
53 tolerance and resilience through changes in mindfulness. *Mental Health & Prevention*  
54 2016;4(1):36-41. doi: 10.1016/j.mhp.2016.01.001
- 55  
56  
57  
58  
59  
60

- 1
- 2
- 3 59. Segal ZV, Williams JMG, Teasdale JD. Mindfulness-based cognitive therapy for depression. 1 ed.
- 4 New York: Guilford Press 2002.
- 5 60. Khoury B, Lecomte T, Fortin G, et al. Mindfulness-based therapy: A comprehensive meta-analysis.
- 6 *Clin Psychol Rev* 2013;33(6):763-71. doi: 10.1016/j.cpr.2013.05.005
- 7 61. Ozawa-de Silva B, Negi LT. Cognitively-Based Compassion Training: Protocol and key concepts.
- 8 Singer, T. and Bolz, M. Compassion: Bridging Theory and Practice. Leipzig: Max Planck
- 9 Institute for Human Cognitive and Brain Sciences 2013:416-38.
- 10 62. Dodds SE, Pace TW, Bell ML, et al. Feasibility of Cognitively-Based Compassion Training (CBCT) for
- 11 breast cancer survivors: A randomized, wait list controlled pilot study. *Support Care Cancer*
- 12 2015;23(12):3599-608. doi: 10.1007/s00520-015-2888-1 [published Online First: 2015/08/16]
- 13 63. Desbordes G, Negi LT, Pace TW, et al. Effects of mindful-attention and compassion meditation
- 14 training on amygdala response to emotional stimuli in an ordinary, non-meditative state.
- 15 *Front Hum Neurosci* 2012;6:292. doi: 10.3389/fnhum.2012.00292 [published Online First:
- 16 2012/11/06]
- 17 64. Strauss C, Lever Tayler B, Gu J, et al. What is compassion and how can we measure it? A review of
- 18 definitions and measures. *Clin Psychol Rev* 2016;47:15-27. doi: 10.1016/j.cpr.2016.05.004
- 19 65. Fredrickson BL, Cohn MA, Coffey KA, et al. Open hearts build lives: positive emotions, induced
- 20 through loving-kindness meditation, build consequential personal resources. *J Pers Soc*
- 21 *Psychol* 2008;95(5):1045-62. doi: 10.1037/a0013262
- 22 66. Hutcherson CA, Seppala EM, Gross JJ. Loving-kindness meditation increases social connectedness.
- 23 *Emotion* 2008;8(5):720-4. doi: 10.1037/a0013237
- 24 67. Pace TWW, Negi LT, Adame DD, et al. Effect of compassion meditation on neuroendocrine, innate
- 25 immune and behavioral responses to psychosocial stress. *Psychoneuroendocrinology*
- 26 2009;34(1):87-98. doi: 10.1016/j.psyneuen.2008.08.011
- 27 68. Carson JW, Carson KM, Gil KM, et al. Mindfulness-based relationship enhancement (MBRE) in
- 28 couples. In: Baer RA, ed. Mindfulness-based treatment approaches: Clinician's guide to
- 29 evidence base and applications. Burlington, MA: Academic Press 2006:309-31
- 30 69. Wachs K, Cordova JV. Mindful relating: exploring mindfulness and emotion repertoires in intimate
- 31 relationships. *J Marital Fam Ther* 2007;33(4):464-81. doi: 10.1111/j.1752-0606.2007.00032.x
- 32 [published Online First: 2007/10/16]
- 33 70. Barnes S, Brown KW, Krusemark E, et al. The role of mindfulness in romantic relationship
- 34 satisfaction and responses to relationship stress. *J Marital Fam Ther* 2007;33(4):482-500. doi:
- 35 10.1111/j.1752-0606.2007.00033.x [published Online First: 2007/10/16]
- 36 71. Neff KD. The development and validation of a scale to measure self-compassion. *Self Identity*
- 37 2003;2(3):223-50. doi: 10.1080/15298860390209035
- 38 72. Yarnell LM, Neff KD. Self-compassion, interpersonal conflict resolutions, and well-being. *Self*
- 39 *Identity* 2013;12:146-59.
- 40 73. Falkai P, Wittchen H-U. Diagnostisches und Statistisches Manual Psychischer Störungen - DSM-5.
- 41 Göttingen: Hogrefe 2014:1298.
- 42 74. Hamilton M. A rating scale for depression. *J Neurol Neurosurg Psychiatry* 1960;23:56-62.
- 43 75. Beck AT, Steer RA, Ball R, et al. Comparison of Beck Depression Inventories -IA and -II in
- 44 psychiatric outpatients. *J Pers Assess* 1996;67(3):588-97. doi: 10.1207/s15327752jpa6703\_13
- 45 76. DGPPN, BÄK, KBV, et al. S3-Leitlinie/Nationale VersorgungsLeitlinie Unipolare Depression –
- 46 Langfassung. 2. Aufl. ed 2015.
- 47 77. Hahlweg K, Kraemer M, Schindler L, et al. Partnerschaftsprobleme: Eine empirische Analyse. *Z*
- 48 *Klin Psychol* 1980;9:159-69.
- 49 78. Altman DG, Schulz KF, Moher D, et al. The revised CONSORT statement for reporting randomized
- 50 trials: explanation and elaboration. *Ann Intern Med* 2001;134(8):663-94. [published Online
- 51 First: 2001/04/17]
- 52 79. Cohen S. Social relationships and health. *Am Psychol* 2004;59(8):676-84. doi: 10.1037/0003-
- 53 066X.59.8.676
- 54 80. Beach SR, Sandeen EE, O'leary KD. Depression in Marriage. New York: Guilford Press 1990.
- 55
- 56
- 57
- 58
- 59
- 60

- 1
- 2
- 3 81. Cohen S, Daniel O'Leary K, Foran HM, et al. Mechanisms of change in brief couple therapy for
- 4 depression. *Behav Ther* 2014;45(3):402-17. doi: 10.1016/j.beth.2014.01.003
- 5 82. Hahlweg K, Baucom DH. Partnerschaft und Sörung. 1 ed: Hogrefe 2008.
- 6 83. Kröger C, Heinrichs N, Hahlweg K. Kompetenz-, Kommunikations- und Problemlösetraining
- 7 [Competence training, communication training, and problem-solving training]. In: Hautzinger
- 8 M, Pauli P, eds. Göttingen: Hogrefe 2009.
- 9 84. Schindler L, Hahlweg K, Revenstorf D. Partnerschaftsprobleme: Diagnose und Therapie. Handbuch
- 10 für den Therapeuten. 2 ed. Berlin: Springer 2006.
- 11 85. Carson JW, Carson KM, Gil KM, et al. Mindfulness-Based Relationship Enhancement. *Behav Ther*
- 12 2003;35(3):471-94.
- 13 86. McCullough Jr J. Treatment for chronic depression: CBASP. New York: Guilford 2000.
- 14 87. Singer T, Bornemann B. The ReSource training protocol. In: Singer T, Bornemann B, eds.
- 15 Compassion: Bridging practice and science. Leipzig: Max Planck Institute for Human Cognitive
- 16 and Brain Sciences 2013:452-65.
- 17 88. Bundespsychotherapeutenkammer. BPTK -Studie zu Wartezeiten in der ambulanten
- 18 psychotherapeutischen Versorgung – Umfrage der Landespsychotherapeutenkammern und
- 19 der BPTK. [www.bptk.de](http://www.bptk.de), 2011.
- 20 89. Geller SM, Greenberg LS, Watson JC. Therapist and client perceptions of therapeutic presence:
- 21 the development of a measure. *Psychother Res* 2010;20(5):599-610. doi:
- 22 10.1080/10503307.2010.495957
- 23 90. Del Re AC, Fluckiger C, Goldberg SB, et al. Monitoring mindfulness practice quality: an important
- 24 consideration in mindfulness practice. *Psychother Res* 2013;23(1):54-66. doi:
- 25 10.1080/10503307.2012.729275
- 26 91. Mander J. The individual therapy process questionnaire: development and validation of a revised
- 27 measure to evaluate general change mechanisms in psychotherapy. *Clin Psychol Psychother*
- 28 2015;22(4):328-45. doi: 10.1002/cpp.1892
- 29 92. Watson D, Clark LA, Tellegen A. Development and validation of brief measures of positive and
- 30 negative affect: The PANAS Scales. *J Pers Soc Psychol* 1988;54(6):1063-70.
- 31 93. Baumann U. Methodische Untersuchungen zur Hamilton-Depression-Skala. *Arch Psychiatr*
- 32 *Nervenkr* 1976;222(4):359-75.
- 33 94. Herzberg PY, Goldschmidt S, Heinrichs N. Beck Depressions-Inventar (BDI-II). Revision. *TBS-TK*
- 34 *Rezession* 2008
- 35 95. Pruessner JC, Kirschbaum C, Meinlschmid G, et al. Two formulas for computation of the area
- 36 under the curve represent measures of total hormone concentration versus time-dependent
- 37 change. *Psychoneuroendocrinology* 2003;28(7):916-31.
- 38 96. Heart rate variability: Standards of measurement, physiological interpretation, and clinical use.
- 39 Task Force of The European Society of Cardiology and The North American Society of Pacing
- 40 and Electrophysiology. *Circulation* 1996;93(5):1043-65.
- 41 97. Garcia CA, Otero A, Presedo J, et al. A software toolkit for nonlinear Heart Rate Variability
- 42 analysis. Computing in Cardiology Conference (CinC), 2013.
- 43 98. National Institute of Mental Health. Research Domain Criteria (RDoC) 2013 [Available from:
- 44 [https://www.nimh.nih.gov/research-priorities/rdoc/development-and-definitions-of-the-](https://www.nimh.nih.gov/research-priorities/rdoc/development-and-definitions-of-the-rdoc-domains-and-constructs.shtml)
- 45 [rdoc-domains-and-constructs.shtml](https://www.nimh.nih.gov/research-priorities/rdoc/development-and-definitions-of-the-rdoc-domains-and-constructs.shtml) accessed 02.02.2017.
- 46 99. Riganello F, Dolce G, Sannita WG. Heart rate variability and the central autonomic network in
- 47 severe disorder of consciousness. *J Rehabil Med* 2012;44:495-501. doi: 10.2340/16501977-
- 48 0975
- 49 100. Thayer JF, Ahs F, Fredrikson M, et al. A meta-analysis of heart rate variability and neuroimaging
- 50 studies: implications for heart rate variability as a marker of stress and health. *Neurosci*
- 51 *Biobehav Rev* 2012;36(2):747-56. doi: 10.1016/j.neubiorev.2011.11.009
- 52 101. Critchley HD, Mathias CJ, Josephs O, et al. Human cingulate cortex and autonomic control:
- 53 converging neuroimaging and clinical evidence. *Brain* 2003;126(10):2139-52. doi:
- 54 10.1093/brain/awg216
- 55
- 56
- 57
- 58
- 59
- 60

102. Holzman JB, Bridgett DJ. Heart rate variability indices as bio-markers of top-down self-regulatory mechanisms: A meta-analytic review. *Neurosci Biobehav Rev* 2017;74:233-55. doi: 10.1016/j.neubiorev.2016.12.032
103. Bassett D. A literature review of heart rate variability in depressive and bipolar disorders. *Aust N Z J Med* 2016;50(6):511-19. doi: 10.1177/0004867415622689
104. Kuo TBJ, Lai CJ, Huang YT, et al. Regression analysis between heart rate variability and baroreflex-related vagus nerve activity in rats. *J Cardiovasc Electrophysiol* 2005;16(8):864-69. doi: 10.1111/j.1540-8167.2005.40656.x
105. Thayer JF, Lane RD. Claude Bernard and the heart-brain connection: Further elaboration of a model of neurovisceral integration. *Neurosci Biobehav Rev* 2009;33(2):81-88. doi: 10.1016/j.neubiorev.2008.08.004
106. Fernández JR, Hermida RC, Mojón A. Chronobiological analysis techniques. Application to blood pressure. *Philosophical Transactions of the Royal Society A* 2009;367:431-45. doi: 10.1098/rsta.2008.0231
107. Refinetti R, Cornélissen G, Halberg F. Procedures for numerical analysis of circadian rhythms. *Biol Rhythm Res* 2007;38(4):275-325. doi: 10.1080/09291010600903692
108. Faul F, Erdfeld E, Lang AG, et al. A flexible statistical power analysis program for the social, behavioral, and biomedical sciences. *Behav Res Methods* 2007;39(2):175-91.
109. van Aalderen JR, Donders AR, Giommi F, et al. The efficacy of mindfulness-based cognitive therapy in recurrent depressed patients with and without a current depressive episode: A randomized controlled trial. *Psychol Med* 2012;42(5):989-1001. doi: 10.1017/s0033291711002054 [published Online First: 2011/10/25]
110. National Institute of Mental Health. Research Domain Criteria (RDoC) 2017 [Available from: <http://www.nimh.nih.gov/research-priorities/rdoc/development-and-definitions-of-the-rdoc-domains-and-constructs.shtml>].
111. Pace TWW, Negi LT, Dodson-Lavelle B, et al. Engagement with Cognitively-Based Compassion Training is associated with reduced salivary C-reactive protein from before to after training in foster care program adolescents. *Psychoneuroendocrinology* 2013;38(2):294-99. doi: 10.1016/j.psyneuen.2012.05.019
112. Reddy SD, Negi LT, Dodson-Lavelle B, et al. Cognitive-Based Compassion Training: A promising prevention strategy for at-risk adolescents. *J Child Fam Stud* 2013;22(2):219-30. doi: 10.1007/s10826-012-9571-7
113. Shonin E, Van Gordon W, Compare A, et al. Buddhist-derived loving-kindness and compassion meditation for the treatment of psychopathology: a systematic review. *Mindfulness* 2015;6(5):1161-80. doi: 10.1007/s12671-014-0368-1
114. Pace TWW, Negi LT, Sivilli TI, et al. Innate immune, neuroendocrine and behavioral responses to psychosocial stress do not predict subsequent compassion meditation practice time. *Psychoneuroendocrinology* 2010;35(2):310-15. doi: 10.1016/j.psyneuen.2009.06.008
115. Schulz U, Schwarzer R. Soziale Unterstützung bei der Krankheitsbewältigung: Die Berliner Social Support Skalen (BSSS). *Diagnostica* 2003;49(2):73-82.
116. Sprecher S, Fehr B. Compassionate love for close others and humanity. *J Soc Pers Relat* 2005 doi: 10.1177/0265407505056439
117. Aguilar-Raab C, Grevenstein D, Schweitzer J. Measuring Social Relationships in Different Social Systems: The Construction and Validation of the Evaluation of Social Systems (EVOS) Scale. *PLoS One* 2015;10(7):e0133442-e42. doi: 10.1371/journal.pone.0133442
118. Aguilar-Raab C, Grevenstein D, Gotthardt L, et al. Changing me, changing us: relationship quality and collective efficacy as major outcomes in systemic couple therapy. *Fam Process* 2017 doi: 10.1111/famp.12302 [published Online First: 2017/06/29]
119. Russell DW. UCLA Loneliness Scale (Version 3): reliability, validity, and factor structure. *J Pers Assess* 1996;66(1):20-40. doi: 10.1207/s15327752jpa6601\_2
120. Doring N, Bortz J. Psychometrische Einsamkeitsforschung. Deutsche Neukonstruktion der UCLA Loneliness Scale. *Diagnostica* 1993;39:224-39.

- 1  
2  
3 121. Baer RA, Smith GT, Allen KB. Assessment of mindfulness by self-report: The Kentucky Inventory  
4 of Mindfulness Skills. *Assessment* 2004;11(3):191-206. doi: 10.1177/1073191104268029  
5 122. Ströhle G, Nachtigall C, Michalak J, et al. Die Erfassung von Achtsamkeit als mehrdimensionales  
6 Konstrukt: Die deutsche Version des Kentucky Inventory of Mindfulness Skills (KIMS-D) *Z Klin  
7 Psychol Psychother* 2010;39:1-12. doi: 10.1026/1616-3443/a000001  
8 123. Hahlweg K. Konstruktion und Validierung des Partnerschaftsfragebogens PFB. *Z Klin Psychol  
9* 1979;8(1):17-40.  
10 124. Spitzer RL, Kroenke K, Williams JB. Validation and utility of a self-report version of PRIME-MD:  
11 the PHQ primary care study. Primary Care Evaluation of Mental Disorders. Patient Health  
12 Questionnaire. *JAMA* 1999;282(18):1737-44.  
13 125. Löwe B, Spitzer RL, Zipfel S, et al. PHQ-D: Gesundheitsfragebogen für Patienten. Karlsruhe: Pfizer  
14 2002.  
15 126. Hendrick SS. A Generic measure of relationship satisfaction. *Journal of Marriage and Family  
16* 1988;50 (1):93-98. doi: 10.2307/352430  
17 127. Hupfeld J, Ruffieux N. Validierung einer deutschen Version der Self-Compassion Scale (SCS-D). *Z  
18 Klin Psychol Psychother* 2011;40(2):115-23. doi: 10.1026/1616-3443/a000088  
19 128. Schulz P, Schlotz W, Becker P. Trier Inventar zum chronischen Stress (TICS) Göttingen: Hogrefe  
20 2004.  
21 129. Bernstein DP, Fink L. Childhood Trauma Questionnaire: A retrospective self-report manual. San  
22 Antonio: TX: The Psychological Corporation 1998.  
23 130. Thomas A, Brähler E, Strauß B. IIP-32: Entwicklung, Validierung und Normierung einer Kurzform  
24 des Inventars zur Erfassung interpersonaler Probleme. *Diagnostica* 2011;57(2):68-83.  
25 131. Horowitz LM, Rosenberg SE, Baer BA, et al. Inventory of interpersonal problems: Psychometric  
26 properties and clinical applications. *J Consult Clin Psychol* 1998;56(6): 885-92.  
27 132. Wittchen H-U, Wunderlich U, Gruschwitz S, et al. Strukturiertes Klinisches Interview für DSM-IV  
28 Achse I: Psychische Störungen. Göttingen: Hogrefe 1997.  
29  
30  
31  
32  
33  
34  
35  
36  
37  
38  
39  
40  
41  
42  
43  
44  
45  
46  
47  
48  
49  
50  
51  
52  
53  
54  
55  
56  
57  
58  
59  
60

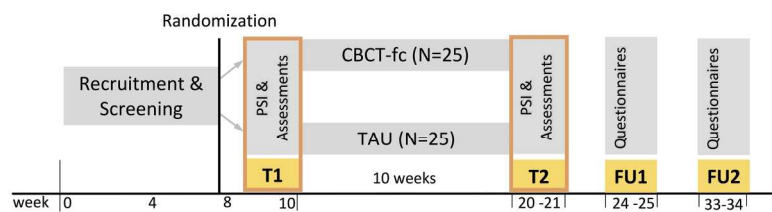

Fig. 1 Study Design.

PSI = Positive Social Interaction; TAU = Treatment as usual; CBCT®-fc = Cognitively-Based Compassion Training for Couples; T1 = measurement point 1 (baseline); T2 = measurement point 2 (post intervention); FU1/2 = follow-up 1 and 2

190x107mm (300 x 300 DPI)

1  
2  
3  
4  
5  
6  
7  
8  
9  
10  
11  
12  
13  
14  
15  
16  
17  
18  
19  
20  
21  
22  
23  
24  
25  
26  
27  
28  
29  
30  
31  
32  
33  
34  
35  
36  
37  
38  
39  
40  
41  
42  
43  
44  
45  
46  
47  
48  
49  
50  
51  
52  
53  
54  
55  
56  
57  
58  
59  
60



Fig. 2 Assessments.

PSI = Positive Social Interaction, ECG = electrocardiogram, CVP = circadian variation pattern, HRV = heart rate variability, IL = interleukin

190x107mm (300 x 300 DPI)

view only

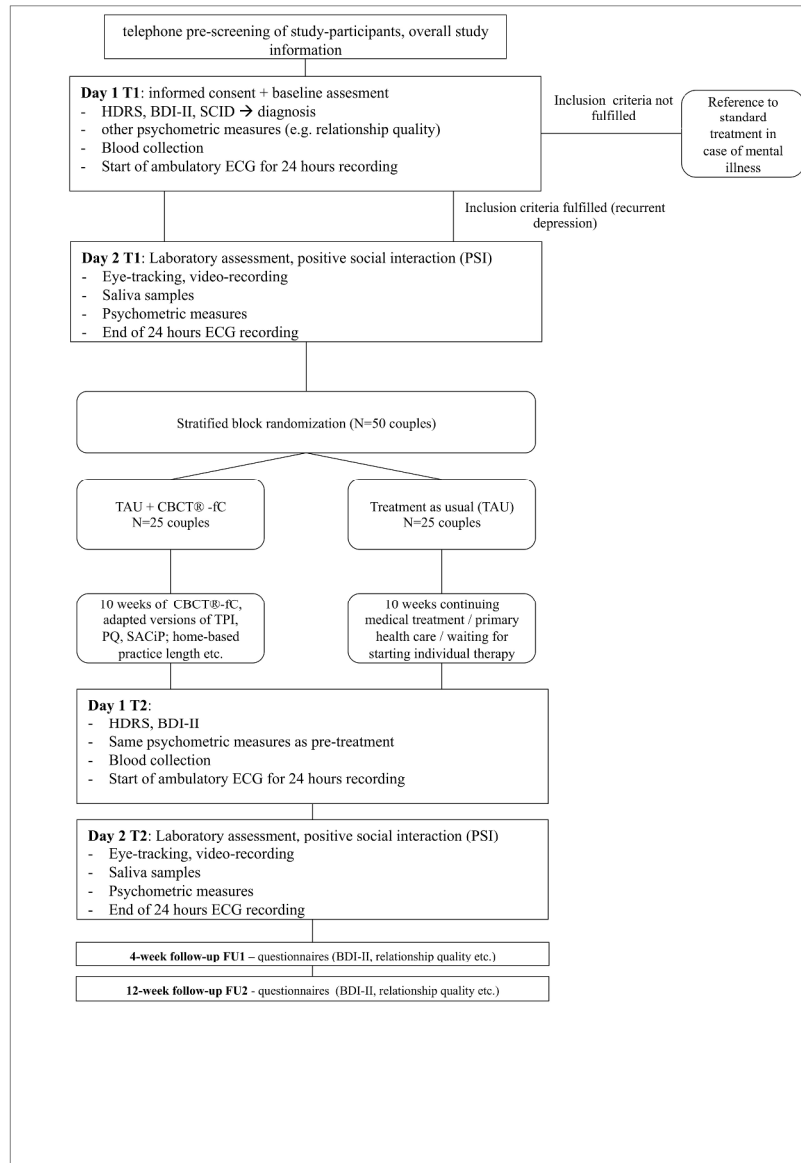

Fig. 3 Flow diagram.

HDRS = Hamilton Depression Rating Scale, BDI = Beck Depression Inventory, SCID = Structured Clinical Interview for DSM, ECG = electrocardiogram, PSI = positive social interaction, CBCT®-fC = Cognitively-Based Compassion Training for Couples, TAU = Treatment as usual, TPI = Therapeutic Presence Inventory, PQ = Practice Quality, SACiP = Scale for the Multiperspective Assessment of General Change Mechanisms in Psychotherapy

275x397mm (300 x 300 DPI)



## APPENDIX 1: Example laboratory set up

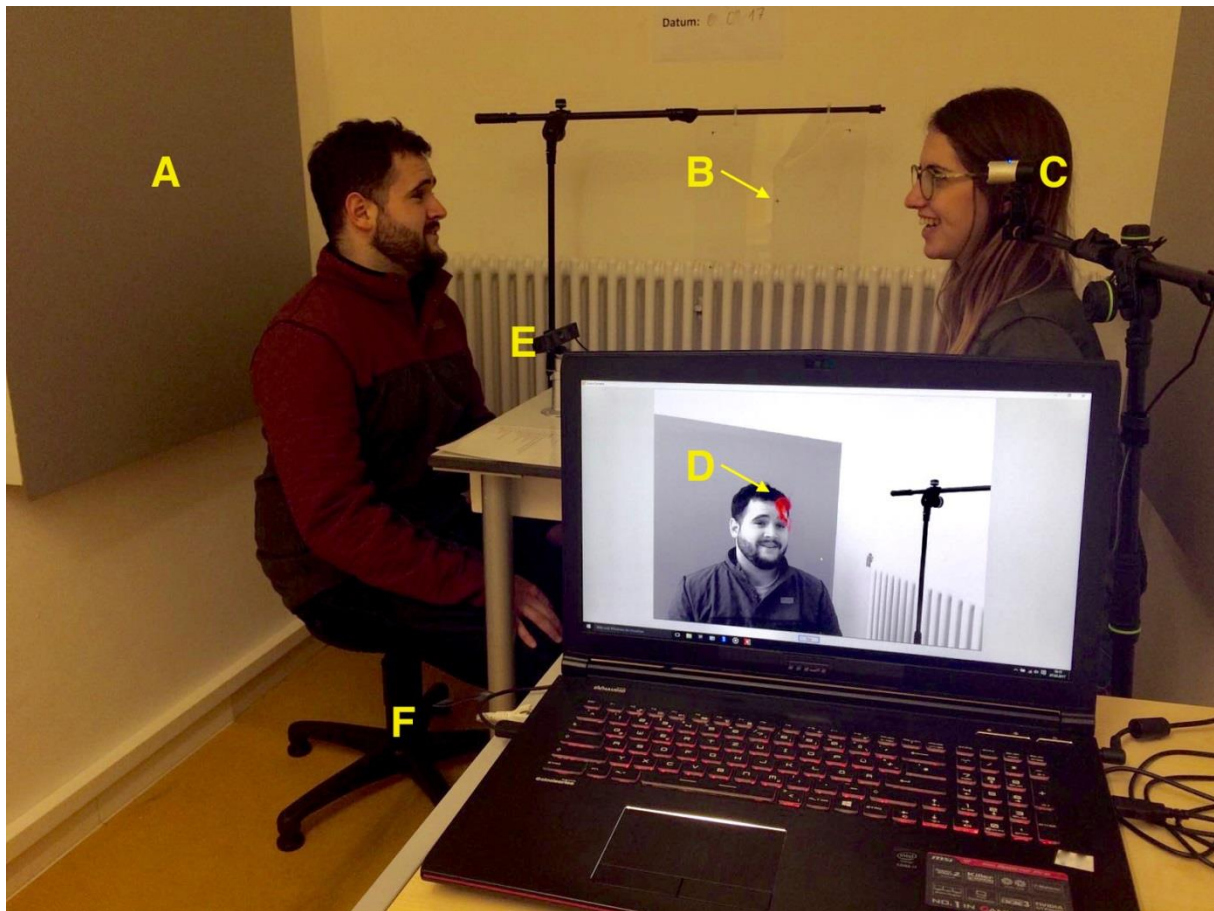

A: Homogeneous grey wall enhancing detection; B: Stand with calibration screen grid, swings towards nose with central point (arrow); C: Stand with Full HD Scene cam; D: Live view of scene cam with red dot indicating gaze point; E: Eye-tracker; F: height adjustable chair.

Note: The two persons depicted here, are lab members who gave written consent publishing this picture.

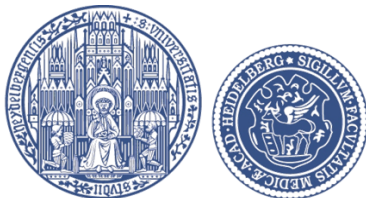

## UniversitätsKlinikum Heidelberg

Institut für Medizinische Psychologie | Bergheimer Str. 20 | 69115 Heidelberg

# Einwilligungserklärung zur Studie: „Psychobiologische Marker und reales Interaktionsverhalten bei Depression: CBCT-Studie“

Version 3.0

Proband (Name, Vorname):

Geb.-Datum: \_\_\_\_\_ . \_\_\_\_\_ . \_\_\_\_\_

ID-Aufkleber:  
(Pseudonym)

Hiermit erkläre ich meine Einwilligung zur Teilnahme an dem Forschungsprojekt gemäß der vorstehenden Information. Durch meine Unterschrift bestätige ich, dass ich den Inhalt der Information gelesen und verstanden habe. Ich hatte Gelegenheit Fragen zu stellen, die mir zufriedenstellend beantwortet wurden. Ich weiß, dass meine Teilnahme freiwillig ist und ich meine Einwilligung jederzeit ohne Angabe von Gründen widerrufen und die Vernichtung meiner Blut- und Speichelproben sowie aller Daten fordern kann, ohne dass mir daraus irgendwelche Nachteile entstehen.

- Ich bin ausdrücklich damit einverstanden, dass meine Daten und Biomaterialien für den in der Informationsschrift benannten Forschungszweck verwendet werden.
- Ich stimme ausdrücklich zu, dass das Eigentum der mir entnommenen Biomaterialien an das Institut für Medizinische Psychologie des Universitätsklinikums Heidelberg übertragen wird.

Mir ist bewusst, dass ich nicht notwendigerweise einen persönlichen Vorteil aus diesem Forschungsprojekt haben werde.

Aus den mir entnommenen Körpermaterialien können wider Erwarten medizinische Erkenntnisse, sogenannte Zufallsbefunde, erlangt werden, die für die Erhaltung oder Wiederherstellung meiner eigenen Gesundheit von erheblicher Bedeutung sein können. Nachstehend können Sie entscheiden wie die Studienleitung damit umgehen soll:

- Ja, ich möchte über Zufallsbefunde meiner Untersuchung informiert werden.
- Nein, ich möchte über Zufallsbefunde meiner Untersuchung **nicht** informiert werden.

DF

### Zentrum für Psychosoziale Medizin

Klinik für Allgemeine Psychiatrie  
mit Poliklinik  
Prof. Dr. Sabine Herpertz

Klinik für Psychosomatische u. Allgemeine  
Klinische Medizin  
Prof. Dr. W. Herzog

Klinik für Kinder- u. Jugendpsychiatrie  
Prof. Dr. F. Resch

**Institut für Medizinische Psychologie**  
**Prof. Dr. B. Ditzen**

Institut für Psychosoziale Prävention  
Prof. Dr. phil. Svenja Taubner

### Forschungsteam:

**Prof. Dr. Beate Ditzen**

Direktorin des Instituts für Medizinische  
Psychologie

### Projektleitung:

**Dr. Corina Aguilar-Raab, Dipl.-Psych.**  
[Corina.Aguilar-Raab@med.uni-heidelberg.de](mailto:Corina.Aguilar-Raab@med.uni-heidelberg.de)  
**Dr. Marc N. Jarczok, Dipl. SoWi**  
[marc.jarczok@med.uni-heidelberg.de](mailto:marc.jarczok@med.uni-heidelberg.de)

Institut für Medizinische Psychologie im  
Zentrum für Psychosoziale Medizin des  
UniversitätsKlinikums Heidelberg

Bergheimer Straße 20  
D-69115 Heidelberg

Tel.: Dr. Aguilar-Raab & Dr. Jarczok  
06221/568135

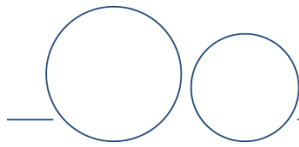

Weiterhin ist mir bewusst, dass zum Zwecke der Erhebung von weiteren Verlaufsdaten die Möglichkeit besteht, mich zu einem späteren Zeitpunkt erneut zu kontaktieren, um ergänzende Informationen und/oder Biomaterialien von mir zu erbitten.

Eine mögliche Kontaktaufnahme erfolgt über die Studienleiterin:

Prof. Dr. phil. Dipl.- Psych. Beate Ditzen  
Institut für Medizinische Psychologie im  
Zentrum für Psychosoziale Medizin (ZPM)  
Universitätsklinikum Heidelberg  
Bergheimer Str. 20, D-69115 Heidelberg  
Tel.: +49 6221 56 8150  
E-Mail: [beate.ditzen@med.uni-heidelberg.de](mailto:beate.ditzen@med.uni-heidelberg.de)

#### Datenschutz:

Mir ist bekannt, dass bei diesem Forschungsvorhaben personenbezogene Daten, insbesondere biologische Befunde und Daten, die aus Fragebögen generiert werden, über mich erhoben, gespeichert und ausgewertet werden sollen. Die Verwendung der Angaben über diese biologischen Befunde und Daten erfolgt nach gesetzlichen Bestimmungen und setzt vor der Teilnahme an dem Forschungsvorhaben folgende freiwillig abgegebene Einwilligungserklärung voraus, das heißt ohne die nachfolgende Einwilligung kann ich nicht an dem Forschungsvorhaben teilnehmen.

1. Ich erkläre mich damit einverstanden, dass im Rahmen dieses Forschungsvorhabens personenbezogene Daten, insbesondere Angaben über biologische Befunde (gewonnen aus den entnommenen Blut- und Speichelproben) sowie Daten aus Fragebogenbefragungen, über mich erhoben und in Papierform sowie auf elektronischen Datenträgern im Universitätsklinikum Heidelberg aufgezeichnet werden. Die erhobenen Daten und Blutproben dürfen pseudonymisiert (verschlüsselt) an die Abteilung „Genetische Epidemiologie in der Psychiatrie“ des Zentralinstituts für Seelische Gesundheit in Mannheim zum Zwecke der wissenschaftlichen Auswertung weitergegeben werden.
2. Ich bin darüber aufgeklärt worden, dass ich jederzeit die Teilnahme an dem Forschungsvorhaben beenden kann. Beim Widerruf meiner Einwilligung, an dem Forschungsvorhaben teilzunehmen, habe ich das Recht, die Löschung aller meiner bis dahin gespeicherten personenbezogenen Daten und die Vernichtung aller erhobenen Biomaterialien (Blut- und Speichelproben) zu verlangen.
3. Ich erkläre mich damit einverstanden, dass meine Daten und Biomaterialien nach Beendigung oder Abbruch des Forschungsvorhabens für maximal 10 Jahre aufbewahrt werden. Danach werden meine personenbezogenen Daten gelöscht, soweit nicht gesetzliche oder satzungsmäßige Aufbewahrungsfristen der Löschung entgegenstehen.

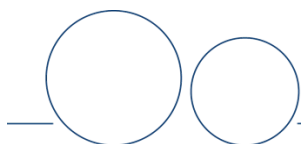

4. Ich erkläre mich damit einverstanden, dass die erhobenen Daten nach Beendigung der Studie der nationalen und internationalen Wissenschaft in anonymisierter Form durch eine Veröffentlichung über das Forschungsdatenrepositorium der Universität Heidelberg „heiDATA“ zugänglich gemacht werden. Dies dient zusätzlich der wissenschaftlichen Qualitätssicherung im Sinne der Nachvollziehbarkeit der erbrachten Studienergebnisse. Eine Aufbewahrung der Daten bei heiDATA erfolgt **ohne** persönliche Identifikatoren (z.B. Name oder Kontaktdaten). Die auf diese Weise veröffentlichten Daten sowie auch Veröffentlichungen in wissenschaftlichen Fachartikeln, welche die Daten in anonymisierter Form verwenden, bleiben dauerhaft öffentlich verfügbar.

1  
2  
3  
4  
5  
6  
7  
8  
9  
10  
11  
12  
13  
14  
15  
16  
17  
18  
19  
20  
21  
22  
23  
24  
25  
26  
27  
28  
29  
30  
31  
32  
33  
34  
35  
36  
37  
38  
39  
40  
41  
42  
43  
44  
45  
46  
47  
48  
49  
50  
51  
52  
53  
54  
55  
56  
57  
58  
59  
60

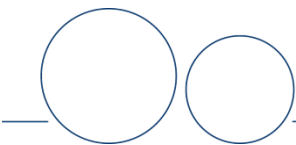

**Eine Kopie der Probandeninformation und Einwilligungserklärung habe ich erhalten. Das Original verbleibt beim Institut für Medizinische Psychologie des Universitätsklinikums Heidelberg.**

\_\_\_\_\_  
**Name des Probanden in Druckbuchstaben**

Heidelberg, den

\_\_\_\_\_  
**Ort, Datum**

\_\_\_\_\_  
**Unterschrift des Probanden**

**Ich habe das Aufklärungsgespräch geführt und die Einwilligung des Probanden eingeholt.**

\_\_\_\_\_  
**Name des Fachpersonals in Druckbuchstaben**

Heidelberg, den

\_\_\_\_\_  
**Ort, Datum**

\_\_\_\_\_  
**Unterschrift des Fachpersonals**

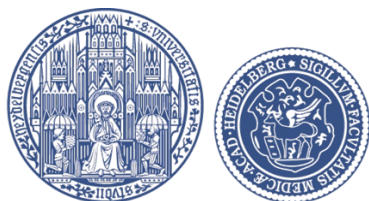

## UniversitätsKlinikum Heidelberg

Institut für Medizinische Psychologie | Bergheimer Str. 20 | 69115 Heidelberg

### Informationsschrift für Frauen mit depressiver Erkrankung in Partnerschaft zur Studie: „Psychobiologische Marker und reales Interaktionsverhalten bei Depression: CBCT-Studie“

Version 3.0

Sehr geehrte Studienteilnehmerin,

herzlichen Dank für Ihr Interesse an unserer Studie mit dem Titel „*Psychobiologische Marker und reales Interaktionsverhalten: CBCT-Studie*“. Wir möchten Sie mit diesem Informationsschreiben über unsere Studie umfassend informieren.

#### 1. Unsere Studie: Worum geht es und warum ist sie wichtig?

Die Depression gehört zu den am weitesten verbreiteten psychischen Störungen weltweit. Nach wie vor sind die Ursachen für eine Depression ungeklärt und wir forschen intensiv zu möglichen Behandlungsansätzen. Nachgewiesen sind bei der Depression Veränderungen von Aufmerksamkeits-, Wahrnehmungs- und Denkprozessen. Diese könnten daran beteiligt sein, dass sich Erkrankte zurückziehen und Gefühle der Unverbundenheit und Einsamkeit auftreten. Ein relativ neuer Therapieansatz bei Depressionen sind Trainings, die auf Achtsamkeit und Mitgefühl fokussieren. Da bei einer Depression häufig zentrale soziale Beziehungen wie zum Beispiel Partnerschaft oder Ehebeeinträchtigt sein können, berichten oft auch die Partner von psychischen Belastungen (z.B. Stress). Somit könnte diese neue Interventionsform zentrale soziale Beziehungen wie die eigene Partnerschaft verbessern, sowie gesundheitsförderliche Effekte durch ein verringertes Stresserleben für beide Partner entfalten.

Im Rahmen dieser Studie möchten wir in einem ersten Teil deshalb überprüfen, **welche Unterschiede** es konkret zwischen Paaren mit und ohne an Depression erkrankter Partnerin gibt.

Hierbei untersuchen wir ein kurzes, angeleitetes **positives Partnerschaftsgespräch**, wozu wir Paare zu uns ins Institut für Medizinische Psychologie einladen. Wir sind an **Verhaltensbeobachtung**, aber auch an verschiedenen **Reaktionen auf körperlicher Ebene** (z.B. Ausmaß an vorhandenen Stresshormonen), die eine psychische Belastung „messbar“ machen, interessiert.

In einem zweiten Teil geht es darum, ob ein Achtsamkeits- und Mitgefühlsbasiertes Gruppentraining für Paare (sog. CBC-Training; entwickelt an der Emory Universität in Atlanta, USA): aus dem Englischen = „Cognitively-Based Compassion Training“ – kognitiv-basiertes Mitgefühlstraining) die Symptome der Depression vermindert und die Partnerschaftsqualität sowie mögliche negative Auswirkungen der Depres-

#### Zentrum für Psychosoziale Medizin

Klinik für Allgemeine Psychiatrie  
mit Poliklinik

Prof. Dr. Sabine Herpertz

Klinik für Psychosomatische u. Allgemeine  
Klinische Medizin

Prof. Dr. W. Herzog

Klinik für Kinder- u. Jugendpsychiatrie

Prof. Dr. F. Resch

**Institut für Medizinische Psychologie**

**Prof. Dr. B. Ditzen**

Institut für Psychosoziale Prävention

Prof. Dr. phil. Svenja Taubner

#### Forschungsteam:

**Prof. Dr. Beate Ditzen**

Direktorin des Instituts für Medizinische  
Psychologie

#### Projektleitung:

**Dr. Corina Aguilar-Raab, Dipl.-Psych.**

[Corina.Aguilar-Raab@med.uni-heidelberg.de](mailto:Corina.Aguilar-Raab@med.uni-heidelberg.de)

**Dr. Marc N. Jarczok, Dipl. SoWi**

[marc.jarczok@med.uni-heidelberg.de](mailto:marc.jarczok@med.uni-heidelberg.de)

Institut für Medizinische Psychologie im  
Zentrum für Psychosoziale Medizin des  
UniversitätsKlinikums Heidelberg

Bergheimer Straße 20  
D-69115 Heidelberg

Tel.: Dr. Aguilar-Raab & Dr. Jarczok  
06221/568135

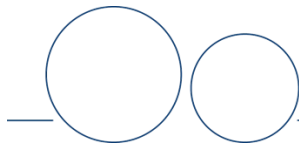

sion auf die eigene körperliche Gesundheit (beispielsweise Stressreaktion) reduziert. Hierbei werden die teilnehmenden Paare per Zufallsprinzip zwei Gruppen zugeordnet: bei der einen Hälfte erfolgt das eben beschriebene CBC-Training, bei der anderen Hälfte nicht – diese Gruppe dient als Kontroll- bzw. Vergleichsgruppe.

Die zufällige Zuteilung (sogenannte Randomisierung) ist eines der wesentlichen Verfahren zur Sicherstellung der Verallgemeinerbarkeit der Studienergebnisse, daher kann die einmal getroffene Zuteilung von der Studienleitung nicht beeinflusst werden. Die Wahrscheinlichkeit, dass Sie in die CBC-Trainingsgruppe kommen, liegt bei 50 Prozent, wobei für die Vergleichsgruppe kein Nachteil entsteht, da beispielweise die bisherige, evtl. antidepressive Behandlung weitergeführt werden kann.

## 2. Welche Daten werden in der Studie erfasst?

In dieser Studie werden Selbstberichtsdaten (erfasst über Fragebögen) und körperliche/biologische Daten („Echtzeit-Blickbewegung/Eye-Tracking“, „Stress-Hormone“, „Stress-Enzyme“, „Stress-Physiologie“, „Immun-Parameter“, „24h Puls“ und „genetische Marker“) erhoben. Die körperlichen Daten werden hierbei zusammenfassend als **Biomaterial** bezeichnet.

## 3. Wie oft werden diese Daten erhoben?

Die unten beschriebene Datenerhebung erfolgt zwei Mal und in allen Gruppen: Sowohl bei der Gruppe, die das CBC-Training erhält, als auch bei der Gruppe ohne Training: Das erste Mal vor Beginn des Trainings und das zweite Mal nach 10 Wochen, bzw. nach Abschluss des Trainings. Circa 4 und 8 Wochen nach der zweiten Datenerhebung erfolgt eine online Fragebogenbefragung, die Sie von zuhause aus durchführen können.

## 4. Welcher Zeitaufwand geht hiermit einher?

Der Zeitaufwand gliedert sich wie folgt:

1. Telefonischer Erstkontakt (5-15 Min.) (bereits erfolgt).
2. Sie erhalten eine weitere Einladung in das Institut für Medizinische Psychologie. Im Rahmen des Labortags 1 findet ein vorbereitendes Gespräch, eine Screening-Erhebung und ein diagnostisches Interview sowie die Blutabnahme statt (heutiger Termin). Danach erhalten Sie und Ihr Partner einen Brustgurt, der Ihren Puls für ca. 24 Stunden im Alltag misst. Mit diesem werden Sie nach Hause entlassen (ca. 2,5 Stunden).
3. Wir bitten Sie, zuhause einige Fragebögen auszufüllen, die wir Ihnen nach dem 1. Tag mitgeben (ca. 30 Minuten).

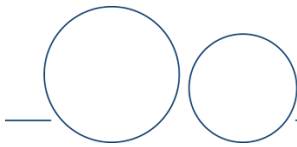

- 1  
2  
3  
4  
5  
6  
7  
8  
9  
10  
11  
12  
13  
14  
15  
16  
17  
18  
19  
20  
21  
22  
23  
24  
25  
26
4. Labortag 2 am Institut für Medizinische Psychologie (zwischen 15 und 20 Uhr): Nach einer kurzen Vorbereitung erfolgt eine angeleitete 10-minütige positive soziale Interaktion mit Ihrem Partner. Während dieser Interaktion werden Ihre Blickbewegungen und weiterhin der Puls (Brustgurt) gemessen. Vor und nach der Interaktion werden insgesamt 4 Speichelproben entnommen (siehe Punkt 6 für genauere Angaben: „**Wie werden die Reaktionen auf körperlicher Ebene gemessen und warum? - Messungen der Blickbewegungen und des Pulses sowie die Entnahme von Biomaterialien Blut- und Speichelproben**“). Danach füllen Sie und Ihr Partner verschiedene Fragebögen aus. Im Anschluss werden Sie und Ihr Partner zu einem abschließendes Paargespräch gebeten. Die Gesamtdauer beträgt insgesamt ca. 160 Minuten.

27  
28  
29  
30  
31  
32  
33  
34  
35  
36  
37  
38  
39  
40

Für diejenigen Paare, die auch an dem CBC-Training teilnehmen, erfolgen einmal wöchentliche, zweistündige Gruppen-Sitzungen, die ebenfalls zur Qualitätssicherung per Video aufgenommen werden. Am Ende jeder Sitzung erfolgt eine kurze Fragebogenbefragung (5 Min.). In den zehn Wochen des CBC-Trainings werden Übungen und teilweise Hausaufgaben bzw. Partnerübungen aufgegeben (jeweils 8-12 Min.). Sie werden vier Mal pro Woche morgens per Kurznachricht (sog. SMS) über Ihr Smartphone daran erinnert und zu Ihrer Übung und Ihrer Befindlichkeit befragt. In der SMS befindet sich dazu ein Link. Wenn Sie auf diesen Link klicken, gelangen Sie zu einer kurzen, internetbasierten Abfrage, welche die Dauer und Intensität sowie ihr aktuelles Befinden erfragt (1-3 Min.). Das Beantworten dieser Fragen können Sie überall dort umsetzen, wo Sie ein internetfähiges Gerät nutzen können (z.B. Ihr Smartphone, Ihren Laptop, Ihr Tablet-PC etc.).

41  
42  
43  
44  
45  
46  
47  
48

Die Paare, die nicht am CBC-Training teilnehmen, werden nur einmal wöchentlich per SMS zu ihrer aktuellen Befindlichkeit befragt (5 Min.). Die Termine der einzelnen Untersuchungsschritte und des CBC-Trainings werden mit Ihnen einzeln abgestimmt – hierzu werden wir Sie zeitnah persönlich kontaktieren. Bei Rückfragen können Sie sich jederzeit an die Projektleiter (Dr. Corina Aguilar-Raab, Dr. Marc N. Jarczok) wenden. Die entsprechenden Kontaktinformationen der Projektleitung entnehmen Sie bitte der ersten Seite dieser Informationsschrift.

- 49  
50  
51  
52  
53
5. **Wie werden die Reaktionen auf körperlicher Ebene gemessen und warum? - Messungen der Blickbewegungen und des Pulses sowie Entnahme von Biomaterialien Blut- und Speichelproben**

54  
55  
56  
57  
58  
59  
60

Der Nachweis biologischer Marker ist wichtig, da hierdurch deutlich wird, in welchem Maße Ihr Körper während einer positiven Interaktion mit Ihrem Partner unter Stress steht. Diese normale, körperliche Reaktion kann vom persönlichen Belastungsempfinden deutlich abweichen. Die akute Aktivierung der biologischen Stresssysteme ist eine normale Reaktion und birgt keinerlei Gefahren für Ihre Gesundheit.



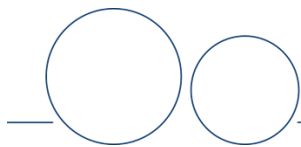

Sie und Ihr Partner liefern uns durch Ihre Mitarbeit dabei wichtige Daten, um ein eventuell verändertes Verhalten zwischen Ihnen beiden im Vergleich zu weniger psychisch belasteten Paaren zu erkennen. Des Weiteren werden die Werte Ihrer Biomarker vor und nach 10 Wochen bzw. nach dem CBC-Training verglichen, womit das Potential des Trainings zur objektiven Verbesserung partnerschaftlicher Interaktion und ihrer individuellen psychischen Belastung gemessen wird.

Mögliche pathologische Zufallsbefunde, also Ergebnisse der Untersuchungen die für Sie gesundheitlich von erheblicher Bedeutung sind und/oder einer weiteren Untersuchung bedürfen, teilt Ihnen die Studienleitung direkt nach der Auswertung mit, sofern Sie dies im Vorfeld wünschen. Unter dem Punkt „**Zufallsbefund**“ finden Sie für jede Untersuchung beschrieben, inwieweit dies möglich ist.

#### **24- Stunden Ein-Kanal-EKG**

Am Labortag 1 (siehe Seite 2) erhalten Sie von uns im Institut für Medizinische Psychologie einen Brustgurt, wie er auch im Sportbereich eingesetzt wird, den Sie direkt anlegen und für ca. 24 Stunden tragen. Die unkomplizierte Handhabung wird Ihnen vor Ort erklärt. Dieser Gurt schränkt den Alltag, den Sie so fortführen sollten wie immer, kaum ein. Die Auswertung erfolgt nach der Gurtrückgabe im Institut für Medizinische Psychologie.

**Warum?** Die Langzeitmessung der Herzfrequenz („Puls“) über 24 Stunden gibt uns Auskunft über Erholung und Entspannung. So können wir die Balance zwischen Belastung und Ruhe der biologischen Systeme Ihres Körpers untersuchen.

**Mögliche Zufallsbefunde** können hierbei nur in geringem Ausmaß festgestellt werden, da wir keine Auswertung des EKGs, sondern allein die Abstände der Herzschläge, also die Herzfrequenz (Schläge des Herzens pro Minute) auswerten. D.h. einzig eine im Durchschnitt dauerhaft deutlich erhöhte Herzfrequenz würden wir Ihnen mitteilen, sofern Sie dies wünschen.

#### **Speichelproben**

Am Labortag 2 werden wir Sie bitten, 20 Min. vor, direkt vor, direkt nach, und 20-30 Min. nach der positiven sozialen Interaktion eine geringe Menge Speichel abzugeben (pro Entnahme ca. 1 ml, insgesamt 4 mal). Für diese Speichelproben stellen wir Ihnen nummerierte und sortierte, einfach zu handhabende Speichelnährchen zur Verfügung und erklären die Benutzung vor Ort.

**Warum?** Psychische Belastung führt zu einer gesteigerten Aktivierung der beiden Hauptstresssysteme im Körper, dem sympathischen Nervensystem (SNS) und der Hypothalamus-Hypophysen-Nebennierenrindennachse (HHNA). Aus 4 Speichelproben pro Proband erheben wir den Verlauf der Parameter dieser Stresssysteme: **Cortisol** (HHNA), **Alpha Amylase** (indirekt SNS) und **Immunparameter Interleukin IL-1 $\beta$**  und **IL-6** (indirekt mit Stress verbunden).

#### **Mögliche Zufallsbefunde:**

Interleukine (IL1- $\beta$  und IL6 aus Speichel): Keine bekannt.

Alpha-Amylase: Keine bekannt.



Speichel-Cortisol: Dauerhaft erhöhtes Cortisol im Speichel kann auf ein Cushing-Syndrom bzw. Morbus Cushing hindeuten.

### Blutproben

An Labortag 1 werden wir Ihnen mit Ihrer Erlaubnis insgesamt ca. 25ml Blut abnehmen (das entspricht etwas mehr als 2 Esslöffeln). Für die Blutentnahme ist es nicht erforderlich, dass Sie nüchtern sind.

**Warum?** Bei Stressreaktionen wird im Gehirn Serotonin freigesetzt. Dies kann jedoch nicht direkt gemessen werden. Wir erfassen die Einflüsse des Stresses auf das Gehirn deshalb indirekt über die Aktivierung des **Serotonin-Transporter-Gens (SLC6A4)**, welches im Blut nachgewiesen werden kann. Zusätzlich untersuchen wir die **genetische Aktivierung des Oxytocinrezeptors (OXTR)**, der mit Stresserleben und Bindungsverhalten in Zusammenhang steht. Beides wird über sogenannte „epigenetische“ Untersuchungen bestimmt. Hierbei wird explizit **nicht** ihr Genom entschlüsselt, sondern gemessen, in wie weit die zwei oben genannten Bereiche des Erbguts von den Körperzellen *abgelesen* werden. Folglich können auch keine Erbkrankheiten o.ä. aufgedeckt werden.

Ebenfalls werden **CRP** (C-reaktives Protein; indirekt mit Stress verbunden) und nochmals Interleukin **IL1- $\beta$  und IL-6** im Blut gemessen. Dies ist das etablierte Verfahren zur Bestimmung der Parameter bei Stress. Mit Hilfe der zusätzlichen, oben beschriebenen Bestimmung der Interleukine im Speichel möchten wir prüfen, ob sich die Blut- und Speichelwerte im Verlauf ähnlich verhalten (steigen und fallen gemeinsam), so dass direkte Schlüsse von Speichel-Interleukine auf Blut-Interleukine gezogen werden können. Falls dies der Fall wäre, könnte bei zukünftigen Untersuchungen (z.B. wissenschaftlichen Studien zum Thema Depression) bei mehrfach nachgewiesenem Zusammenhang auf eine Blutentnahme verzichtet werden. Eine Speichelentnahme würde dann ausreichen.

### Mögliche Zufallsbefunde:

Entzündungsmarker IL-1 $\beta$ , IL-6, CRP: Erhöhte Werte deuten auf eine mögliche akute oder chronische Entzündung hin. Bei Diabetes Mellitus sind auch ohne zusätzlichen psychischen Stress CRP, IL1- $\beta$  und IL-6 erhöht. Aus diesem Grund wird zum Ausschluss eines unbekanntes Diabetes Mellitus **HbA1c**, ein Langzeitmarker des Blutzuckers, bestimmt.

HbA1c: Leicht erhöhte Werte deuten auf einen Prä-Diabetes, erhöhte Werte deuten auf einen Diabetes Mellitus Typ II hin.

Epigenetische Marker (SLC6A4; OXTR): Keine bekannt.

Hinweis: Es wird kein umfassendes Blutbild erstellt. Das heißt, diese zu Forschungszwecken durchgeführte Untersuchung ersetzt nicht eine Blutentnahme bei einem Arzt.

Speicheluntersuchung und Herzfrequenzprofilauswertung sowie die Bestimmung des Interleukin 1 $\beta$  im Blut erfolgen im Institut für Medizinische Psychologie. CRP, HbA1c und Interleukin 6 werden im Zentrallabor des Klinikums bestimmt. Am ZI



Mannheim wird die epigenetische Auswertung von SLC6A4 und OXTR-Gen durchgeführt.

### **Eye Tracking und Videoaufzeichnung**

Beides findet am Labortag 2 während der zehnminütigen positiven sozialen Interaktion statt. Für diese Aufnahmen stehen entsprechende Geräte zur Erfassung der Blickbewegung, sogenannte Eye-Tracker, auf einem Tisch zwischen Ihnen und Ihrem Partner. Außerdem zeichnen zwei Kameras den Kopf und Oberkörper des jeweiligen Gegenübers auf (sogenannte Szenenkameras), ohne die das Eye-Tracking nicht funktionieren würde. Es kommen **keine** Geräte zum Einsatz, die am Kopf o.ä. getragen werden. Sollten Sie eine Brille oder Kontaktlinsen tragen, bitten wir Sie, diese zur Untersuchung mitzubringen. Sollten Sie beides besitzen, bringen Sie bitte Ihre Kontaktlinsen mit, da diese beim Eye-Tracking leichter auszuwertende Ergebnisse liefern.

**Warum?** Der Eye-Tracker ist ein Gerät, das aufzeichnet wohin Sie blicken. In mehreren Studien wurde bereits gezeigt, dass depressiv erkrankte Menschen im Vergleich zu nicht depressiv erkrankten Menschen ein verändertes Blickverhalten aufweisen. Bis jetzt wurde dies jedoch noch nie in einer echten Gesprächssituation zweier Partner systematisch untersucht.

Wir erhoffen uns hieraus neue Erkenntnisse zu erlangen zum Beispiel zur Veränderung der Aufmerksamkeitslenkung. Die Aufnahmen der Szenenkameras erlauben außerdem eine Untersuchung der Kommunikationsmuster. Unser Ziel ist es, Unterschiede im Blickverhalten aufdecken zu können.

**Zufallsbefunde:** Keine bekannt.

## **6. Was ist das CBC-Training?**

Wenn Sie am CBC-Training teilnehmen, werden Sie Methoden erlernen, die sich auf ein positives Miteinander in der Partnerschaft beziehen. Als nicht-religiöse (säkulare) Methode bietet das Training verschiedene Wege an, Mitgefühl gegenüber einem umfassenden Kreis an Menschen zu kultivieren und auszudehnen. Im Vordergrund stehen hier jedoch der Partner und die partnerschaftliche Beziehung.

Die darin beinhalteten Praktiken unterstützen die Entwicklung einer Vielzahl von positiven Qualitäten, Erfahrungen und Verhaltensweisen, wie z.B. Freundlichkeit, Dankbarkeit, als auch Empathie und Mitgefühl. Die fundamentale Grundannahme ist, dass Mitgefühl als eine Persönlichkeitseigenschaft entwickelt und erweitert werden kann. Diese Annahme wird durch aktuelle Forschungsergebnisse unterstützt.

Dieses CBC-Training kombiniert gedankliche Komponenten und Übungen (u.a. Istzustandsanalyse, Achtsamkeits- und Mitgefühlsmeditationen) und solche, die die Partnerschaft und das soziale Miteinander betreffen (z.B. Empathietraining). In standardisierten Labortests wurde bereits gezeigt, dass ein solches Training die psychische und körperliche Stress- und Immunantwort bei gesunden Individuen verbessert. Ob sich das Training auch bei Menschen mit Depressionen entspre-

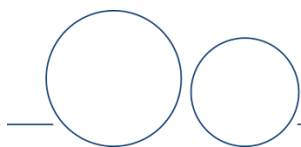

chend positiv auswirkt, und ob es einen positiven Einfluss auf die partnerschaftliche Interaktion hat, ist bisher noch nicht erforscht.

Die Teilnahme an einem CBC-Training über 10 Wochen würde nach aktuellem Stand etwa 300€ pro Person kosten. Für Sie und Ihren Partner ist bei entsprechender Zufallslosung dieses Training jedoch komplett **kostenfrei**. Für die Teilnahme ist eine ärztliche Überweisung an unsere Institutsambulanz notwendig.

## 7. Datenschutz und Aufbewahrung

Die von Ihnen zur Verfügung gestellten Daten und Biomaterialien werden ausschließlich für die wissenschaftliche Forschung verwendet und streng vertraulich behandelt. Ihnen wird bei der ersten Registrierung als Studienteilnehmer eine pseudonymisierte, verschlüsselte Identifikationsnummer (ID-Nummer, aufsteigend) zugeordnet. Dies ist ein Code, der auf Ihren ausgefüllten Fragebögen, Speichelproben etc. steht und keinerlei Informationen über Sie als Person beinhaltet. Alle Materialien, die gesammelt werden, werden mit dieser Nummer versehen. Nur die in Papierform vorliegende Einwilligungserklärung wird sowohl den Namen, als auch diese ID-Nummer enthalten und separat von allen Daten 2-fach verschlossen aufbewahrt werden. Es werden keine Daten mit dem Namen, sondern nur mit Ihrer ID-Nummer analysiert und es gibt außer über die Einwilligungserklärung keinen Weg, den Namen mit der ID-Nummer zu verbinden. Alle psychologischen und körperlichen Daten werden ausschließlich über ID-Nummern kenntlich gemacht. Keine Publikation dieses Projekts wird Ihren Namen preisgeben. Darüber hinaus werden die Ergebnisse sämtlicher Datenanalysen getrennt von Ihren personenbezogenen Daten gespeichert und können nicht ohne Mitwirkung der Projekt- oder Studienleitung Ihrer Person zugeordnet werden.

Diese Studie wird überwiegend aus öffentlichen Mitteln (z.B. der Deutschen Forschungsgemeinschaft DFG) finanziert. In Zukunft ergeben sich möglicherweise neue wissenschaftliche Fragestellungen, die im Rahmen des oben genannten Forschungsbereiches mithilfe der bereits erhobenen Daten oder Biomaterialien beantwortet werden können. Eine Veröffentlichung der Daten kann folglich bei der Beantwortung dieser neuen Fragestellungen helfen, wodurch vergleichbare Daten nicht nochmals erhoben werden müssten und öffentliche Mittel dadurch effizienter genutzt werden könnten.

Die erhobenen Daten werden dazu nach Beendigung der Studie der nationalen und internationalen Wissenschaft in anonymisierter Form durch eine Veröffentlichung über das Forschungsdatenrepositorium der Universität Heidelberg „heiDATA“ zugänglich gemacht. Dies dient zusätzlich der wissenschaftlichen Qualitätssicherung im Sinne der Nachvollziehbarkeit der erbrachten Studienergebnisse. Eine Aufbewahrung der Daten bei heiDATA erfolgt **ohne** persönliche Identifikatoren (z.B. Name oder Kontaktdaten).



Die auf diese Weise veröffentlichten Daten sowie auch Veröffentlichungen in wissenschaftlichen Fachartikeln, welche die Daten in anonymisierter Form verwenden, bleiben dauerhaft öffentlich verfügbar.

Die Daten, Biomaterialien und ausgefüllten Fragebögen werden Eigentum des Instituts für Medizinische Psychologie des Universitätsklinikums Heidelberg. Die Speichel- und Blutproben werden dort aufbewahrt, oder mit Ihrer ID-Nummer verschlüsselt auch an andere Labore verschickt, welche mit diesen Proben Analysen durchführen. Ein Teil der Blutproben wird vom Zentralinstitut für Seelische Gesundheit (Abteilung Genetische Epidemiologie in der Psychiatrie des Zentralinstituts für Seelische Gesundheit) in Mannheim aufbewahrt, das Ihre Blutproben mit einer anderen, separat erzeugten ID-Nummer verschlüsselt zur Analyse des genetischen Materials erhält. Alle in dieser Studie erhobenen Biomaterialien werden befristet auf maximal 10 Jahre nach Beendigung der Studie aufbewahrt. Falls in Zukunft eine wesentlich veränderte wissenschaftliche Fragestellung mithilfe Ihrer Probe untersucht werden soll, wird zuvor eine Stellungnahme der zuständigen Ethikkommission eingeholt.

## 8. Risiken und Nutzen der Teilnahme

### Risiken:

Mit dem Erheben der Fragebogendaten, der Videoaufnahmen, der Aufnahmen der Blickbewegungen, der Langzeitmessungen des Pulses und der Entnahme der Speichelproben sind keinerlei Risiken verbunden.

Mit den Blutentnahmen bestehen die Risiken, die mit einer normalen Blutentnahme verbunden sind. Die Entnahme einer Blutprobe ist in der Regel nur mit einem sehr geringen Risiko verbunden. An der Einstichstelle kann es zu leichten Schmerzen kommen oder es kann ein Bluterguss (blauer Fleck) entstehen, der evtl. einige Tage sichtbar ist. In äußerst seltenen Fällen kann auch die Bildung eines Blutgerinnsels (Thrombose), eine örtlich begrenzte Entzündung oder eine Infektion an der Einstichstelle auftreten oder es kann zu dauerhaften Schädigungen von Blutgefäßen oder Nerven kommen. Die Blutentnahmen werden von einem dazu befähigten und qualifizierten Fachpersonal (i.d.R. Arzt) durchgeführt.

Die Zuordnung zu Behandlungs- bzw. Kontrollgruppe erfolgt über ein Zufallsverfahren (sog. Randomisierung), worauf wir keinen Einfluss haben. Diejenigen, die der Kontrollgruppe zugeordnet werden, erhalten von unserer Seite zunächst keine Intervention. Die übliche Wartezeit auf einen individuellen Psychotherapieplatz für die an Depression Erkrankten kann durch eine reguläre allgemeinärztliche bzw. pharmakologische antidepressive Behandlung aufgenommen bzw. weitergeführt werden.

Für diejenigen Paare, die an dem CBC-Training teilnehmen, sind keine besonderen Risiken zu erwarten. Bisher sind keine unerwünschten Wirkungen in Verbindung mit dem CBC-Training wissenschaftlich erfasst worden. Es sind keine körperlichen



oder psychischen Gefahren zu erwarten. Durch die potenziell emotionalen Erfahrungen während der Trainingssitzungen kann es zu psychischen Reaktionen kommen, z.B. Stimmungsschwankungen. Diese Reaktionen werden in den Sitzungen jedoch berücksichtigt und als wichtige Erlebnisse in das Geschehen des Gruppentrainings einbezogen. Alle Gruppentrainings werden von Psychologen bzw. Psychotherapeuten und zusätzlich in CBCT qualifizierten Trainern durchgeführt, sowie begleitend von erfahrenen Psychotherapeuten supervidiert.

#### **Nutzen:**

Das hier durchgeführte Forschungsvorhaben zielt auf eine Verbesserung unseres Verständnisses für die Entstehung depressiver Störungen sowie deren Therapie durch psychologische Interventionen ab.

Für diejenigen, die an einem für Sie kostenlosen CBC-Training teilnehmen werden, liegt der persönliche Nutzen darin, dass Sie Veränderungsimpulse im Umgang mit und zur Bewältigung der depressiven Störung und vor allem des partnerschaftlichen Umgangs miteinander erhalten können. Beispielsweise könnten Sie im Verlauf des Trainings erleben, wie Sie mit einem positiveren Blick oder Gefühl Ihrem Partner begegnen können. Sie können Impulse für neue Verhaltensweisen erhalten und erfahren, wie es sich anfühlt, wenn Sie eine alternative Haltung zu Ihren Problemen einnehmen.

Nach Ende der Studie werden Ihnen die Gesamtergebnisse der Studie mitgeteilt. Für Ihre vollständige Teilnahme an der Studie erhält **jedes Paar** insgesamt eine Aufwandsentschädigung in Höhe von **200€, also 50€ pro Person pro Messzeitpunkt**, unbar auf ein anzugebendes Konto.

Nach vollständiger Studienteilnahme haben Sie die Möglichkeit als Dankeschön an dem gruppenbasierten Mitgefühlstraining für Paare (CBC-Training) teilzunehmen. Die Kosten hierfür werden vom Institut übernommen (circa 300€ pro Person).

### **9. Freiwilligkeit der Teilnahme**

Die Erhebung, Verarbeitung und Nutzung der Daten im Rahmen des Projektes erfolgt auf Basis der Rechtsgrundlage der freiwilligen und informierten Einwilligung der Teilnehmer (gemäß §§ 4, 4a BDSG). Sie nehmen an dieser Studie freiwillig teil. Sie können Ihre Teilnahme jederzeit auch ohne Angabe von Gründen abbrechen; dies hat keinerlei negative Konsequenzen für Ihre Kursteilnahme oder Ihre Gesundheitsversorgung. Die Zuteilung zur Trainings- oder Kontrollgruppe erfolgt über eine Zufallsauswahl, so dass wir an dieser Stelle keine persönlichen Präferenzen berücksichtigen können.

Die Untersuchungen werden nur dann durchgeführt, wenn Sie dazu freiwillig und schriftlich Ihre Einwilligung erklären.



## 10. Widerrufsrecht

Sie können Ihre Einwilligung zur Verwendung Ihrer Daten und Biomaterialien jederzeit ohne Angabe von Gründen und ohne nachteilige Folgen für Sie widerrufen. Im Falle eines Widerrufs können Sie entscheiden, ob Ihre Biomaterialien vernichtet und die dazu gehörenden Daten gelöscht werden sollen oder ob Sie in anonymisierter Form für weitere Forschungsvorhaben verwendet werden dürfen. Dies gilt auch dann, wenn die verschlüsselten Daten und Blutproben zur wissenschaftlichen Analyse verschlüsselt an das ZI Mannheim weitergegeben wurden. Bereits erhobene Daten verbleiben auch nach Vernichtung des Biomaterials bzw. des Fragebogens in der Studie, soweit der Personenbezug nicht mehr besteht.

### Wenden Sie sich für einen Widerruf bitte an die zuständige Studienleitung:

Prof. Dr. phil. Dipl.- Psych. Beate Ditzen  
Institut für Medizinische Psychologie im  
Zentrum für Psychosoziale Medizin (ZPM)  
Universitätsklinikum Heidelberg  
Bergheimer Str. 20, D-69115 Heidelberg  
Tel.: +49 6221 56 8150  
E-Mail: beate.ditzen@med.uni-heidelberg.de

## 11. Erneute Kontaktaufnahme

Es besteht die Möglichkeit der Kontaktaufnahme durch die Studienleitung, wenn die Ihnen entnommenen Biomaterialien wider Erwarten Informationen enthalten, die für die Erhaltung oder Wiederherstellung Ihrer Gesundheit von erheblicher Bedeutung sind. Die Kontaktaufnahme wird durch die Studienleitung oder durch eine durch die Studienleitung beauftragte Person telefonisch, schriftlich oder per E-Mail erfolgen.

## 12. Versicherungsschutz

Für die Planung und Durchführung der Studie besteht ein Versicherungsschutz für Probanden im Rahmen der Betriebs-Haftpflichtversicherung des Universitätsklinikums Heidelberg. Der Versicherungsschutz erstreckt sich auf die gesetzliche Haftpflicht des Universitätsklinikums sowie auf die persönliche gesetzliche Haftpflicht aller im dienstlichen Auftrag für das Universitätsklinikum an der Studie mitwirkenden Mitarbeiter (Studienleiter, sonstiges Personal), beispielsweise für Schäden durch die Entnahme von Blutproben (Betriebs-/Umwelt-Haftpflicht-, Umweltschadens-Versicherung: Nr. 39327978 01116. Versicherer: HDI-Gerling Industrie Versicherung AG, HDI-Platz 1, 30659 Hannover, Telefon: +49 511 645-0, Telefax: +49 511 645-4545, E-Mail: info@hdi-gerling.de).



### 13. Weitere Informationen

Sollten Sie noch weitere Fragen haben, wenden Sie sich bitte an Ihre Studienleitung (die entsprechenden Kontaktinformationen finden Sie auf Seite 1 dieser Informationsschrift). Stellen Sie alle Fragen, die Ihnen wichtig erscheinen und lassen Sie sich ausreichend Zeit für Ihre Entscheidung zur Teilnahme an dieser wissenschaftlichen Untersuchung.

Mit freundlichen Grüßen

Dr. Corina Aguilar-Raab und Dr. Marc Jarczok  
(Projektleitung)



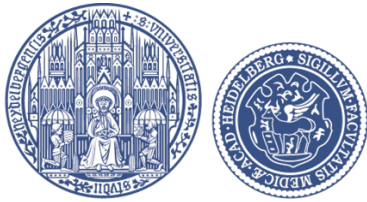

UniversitätsKlinikum Heidelberg

Institut für Medizinische Psychologie | Bergheimer Str. 20 | 69115 Heidelberg

## Informationsschrift für Männer in Partnerschaft mit an Depression erkrankter Partnerin zur Studie: „Psychobiologische Marker und reales Interaktionsverhalten bei Depression: CBCT-Studie“

Version 3.0

Sehr geehrter Studienteilnehmer,

herzlichen Dank für Ihr Interesse an unserer Studie mit dem Titel „*Psychobiologische Marker und reales Interaktionsverhalten: CBCT-Studie*“. Wir möchten Sie mit diesem Informationsschreiben über unsere Studie umfassend informieren.

### 1. Unsere Studie: Worum geht es und warum ist sie wichtig?

Die Depression gehört zu den am weitesten verbreiteten psychischen Störungen weltweit. Nach wie vor sind die Ursachen für eine Depression ungeklärt und wir forschen intensiv zu möglichen Behandlungsansätzen. Nachgewiesen sind bei der Depression Veränderungen von Aufmerksamkeits-, Wahrnehmungs- und Denkprozessen. Diese könnten daran beteiligt sein, dass sich Erkrankte zurückziehen und Gefühle der Unverbundenheit und Einsamkeit auftreten. Ein relativ neuer Therapieansatz bei Depressionen sind Trainings, die auf Achtsamkeit und Mitgefühl fokussieren. Da bei einer Depression häufig zentrale soziale Beziehungen wie zum Beispiel Partnerschaft oder Ehe beeinträchtigt sein können, berichten oft auch die Partner von psychischen Belastungen (z.B. Stress). Somit könnte diese neue Interventionsform zentrale soziale Beziehungen und die eigene Partnerschaft verbessern, sowie gesundheitsförderliche Effekte durch ein verringertes Stresserleben für beide Partner entfalten.

Im Rahmen dieser Studie möchten wir in einem ersten Teil deshalb überprüfen, **welche Unterschiede** es konkret zwischen Paaren mit und ohne an Depression erkrankter Partnerin gibt.

Hierbei untersuchen wir ein kurzes, angeleitetes **positives Partnerschaftsgespräch**, wozu wir Paare zu uns ins Institut für Medizinische Psychologie einladen. Wir sind an **Verhaltensbeobachtung**, aber auch an verschiedenen **Reaktionen auf körperlicher Ebene** (z.B. Ausmaß an vorhandenen Stresshormonen), die eine psychische Belastung „messbar“ machen, interessiert.

In einem zweiten Teil geht es darum, ob ein Achtsamkeits- und Mitgefühlsbasiertes Gruppentraining für Paare (sog. CBC-Training entwickelt an der Emory Universität in Atlanta, USA): aus dem Englischen = „Cognitively-Based Compassion Training“ –

### Zentrum für Psychosoziale Medizin

Klinik für Allgemeine Psychiatrie  
mit Poliklinik

Prof. Dr. Sabine Herpertz

Klinik für Psychosomatische u. Allgemeine  
Klinische Medizin

Prof. Dr. W. Herzog

Klinik für Kinder- u. Jugendpsychiatrie

Prof. Dr. F. Resch

Institut für Medizinische Psychologie

Prof. Dr. B. Ditzen

Institut für Psychosoziale Prävention

Prof. Dr. phil. Svenja Taubner

### Forschungsteam:

Prof. Dr. Beate Ditzen

Direktorin des Instituts für Medizinische  
Psychologie

### Projektleitung:

Dr. Corina Aguilar-Raab, Dipl.-Psych.

[Corina.Aguilar-Raab@med.uni-heidelberg.de](mailto:Corina.Aguilar-Raab@med.uni-heidelberg.de)

Dr. Marc N. Jarczok, Dipl. SoWi

[marc.jarczok@med.uni-heidelberg.de](mailto:marc.jarczok@med.uni-heidelberg.de)

Institut für Medizinische Psychologie im  
Zentrum für Psychosoziale Medizin des  
UniversitätsKlinikums Heidelberg

Bergheimer Straße 20  
D-69115 Heidelberg

Tel.: Dr. Aguilar-Raab & Dr. Jarczok  
06221/568135



kognitiv-basiertes Mitgefühlstraining) die Belastung des Partners und die Symptome der Depression vermindert sowie die Partnerschaftsqualität sowie mögliche negative Auswirkungen der Depression auf die eigene körperliche Gesundheit (beispielsweise Stressreaktion) reduziert. Hierbei werden die teilnehmenden Paare per Zufallsprinzip zwei Gruppen zugeordnet: bei der einen Hälfte erfolgt das eben beschriebene CBC-Training, bei der anderen Hälfte nicht – diese Gruppe dient als Kontroll- bzw. Vergleichsgruppe.

Die zufällige Zuteilung (sogenannte Randomisierung) ist eines der wesentlichen Verfahren zur Sicherstellung der Verallgemeinerbarkeit der Studienergebnisse, daher kann die einmal getroffene Zuteilung von der Studienleitung nicht beeinflusst werden. Die Wahrscheinlichkeit, dass Sie in die CBC-Trainingsgruppe kommen liegt bei 50 Prozent.

## 2. Welche Daten werden in der Studie erfasst?

In dieser Studie werden Selbstberichtsdaten (erfasst über Fragebögen) und körperliche/biologische Daten („Echtzeit-Blickbewegung/Eye-Tracking“, „Stress-Hormone“, „Stress-Enzyme“, „Stress-Physiologie“, „Immun-Parameter“, „24h Puls“ und „genetische Marker“) erhoben. Die körperlichen Daten werden hierbei zusammenfassend als **Biomaterial** bezeichnet.

## 3. Wie oft werden diese Daten erhoben?

Die unten beschriebene Datenerhebung erfolgt zwei Mal und in allen Gruppen: Sowohl bei der Gruppe, die das CBC-Training erhält, als auch bei der Gruppe ohne Training: Das erste Mal vor Beginn des Trainings und das zweite Mal nach 10 Wochen, bzw. nach Abschluss des Trainings. Circa 4 und 8 Wochen nach der zweiten Datenerhebung erfolgt eine online Fragebogenbefragung, die Sie von zuhause aus durchführen können.

## 4. Welcher Zeitaufwand geht hiermit einher?

Der Zeitaufwand gliedert sich wie folgt:

1. Telefonischer Erstkontakt (5-15 Min.) (bereits erfolgt).
2. Sie erhalten eine weitere Einladung in das Institut für Medizinische Psychologie. Im Rahmen des Labortag 1 findet ein vorbereitendes Gespräch, eine Screening-Erhebung und ein diagnostisches Interview sowie die Blutabnahme statt (heutiger Termin). Danach erhalten Sie und Ihre Partnerin einen Brustgurt der Ihren Puls für ca. 24 Stunden im Alltag misst. Mit diesem werden Sie nach Hause entlassen (ca. 2,5 Stunden).

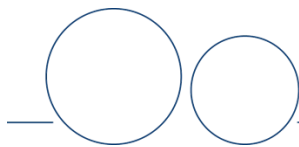

3. Wir bitten Sie, zuhause einige Fragebögen auszufüllen, die wir Ihnen nach dem 1. Tag mitgeben (ca. 30 Minuten).
  
4. Labortag 2 am Institut für Medizinische Psychologie (zw. 15 und 20 Uhr): Nach einer kurzen Vorbereitung erfolgt eine angeleitete 10-minütige positive soziale Interaktion mit Ihrer Partnerin. Während dieser Interaktion werden Ihre Blickbewegungen und weiterhin der Puls (Brustgurt) gemessen. Vor und nach der Interaktion werden insgesamt 4 Speichelproben entnommen (siehe Punkt 6 für genauere Angaben: „**Wie werden die Reaktionen auf körperliche Ebene gemessen und warum? - Messungen der Blickbewegungen und des Pulses sowie die Entnahme von Biomaterialien Blut- und Speichelproben**“). Danach füllen Sie und Ihre Partnerin verschiedene Fragebögen aus. Im Anschluss werden Sie und Ihre Partnerin zu einem abschließendes Paargespräch gebeten. Die Gesamtdauer beträgt insgesamt ca. 160 Minuten.

Für diejenigen Paare, die auch an dem CBC-Training teilnehmen, erfolgen einmal wöchentliche, zweistündige Gruppen-Sitzungen, die ebenfalls zur Qualitätssicherung per Video aufgenommen werden. Am Ende jeder Sitzung erfolgt eine kurze Fragebogenbefragung (5 Min.). In den zehn Wochen des CBC-Trainings werden Übungen und teilweise Hausaufgabe bzw. Partnerübungen aufgegeben (jeweils 8-12 Min.). Sie werden vier Mal pro Woche morgens per Kurznachricht (sog. SMS) über Ihr Smartphone daran erinnert, und zu Ihrer Übung und Ihrer Befindlichkeit befragt. In der SMS befindet sich dazu ein Link. Wenn Sie auf diesen Link klicken, gelangen Sie zu einer kurzen, internetbasierten Abfrage, welche die Dauer und Intensität sowie ihr aktuelles Befinden erfragt (1-3 Min.). Das Beantworten dieser Fragen können Sie überall dort umsetzen, wo Sie ein internetfähiges Gerät nutzen können (z.B. Ihr Smartphone, Ihren Laptop, Ihr Tablet-PC etc.).

Die Paare, die nicht am CBC-Training teilnehmen, werden nur einmal wöchentlich per SMS zu ihrer aktuellen Befindlichkeit befragt (5 Min.). Die Termine der einzelnen Untersuchungsschritte und des CBC-Trainings werden mit Ihnen einzeln abgestimmt – hierzu werden wir Sie zeitnah persönlich kontaktieren. Bei Rückfragen können Sie sich jederzeit an die Projektleiter (Dr. Corina Aguilar-Raab, Dr. Marc N. Jarczok) wenden. Die entsprechenden Kontaktinformationen der Projektleitung entnehmen Sie bitte der ersten Seite dieser Informationsschrift.

#### 5. **Wie werden die Reaktionen auf körperliche Ebene gemessen und warum? - Messungen der Blickbewegungen und des Pulses sowie Entnahme von Biomaterialien Blut- und Speichelproben -**

Der Nachweis biologischer Marker ist wichtig, da hierdurch deutlich wird, in welchem Maße Ihr Körper während einer positiven Interaktion mit Ihrer Partnerin unter Stress steht. Diese normale, körperliche Reaktion kann vom persönlichen



Belastungsempfinden deutlich abweichen. Die akute Aktivierung der biologischen Stresssysteme ist eine normale Reaktion und birgt keinerlei Gefahren für Ihre Gesundheit.

Sie und Ihre Partnerin liefern uns durch Ihre Mitarbeit dabei wichtige Daten, um ein eventuell verändertes Verhalten zwischen Ihnen beiden im Vergleich zu weniger psychisch belasteten Paaren zu erkennen. Des Weiteren werden die Werte Ihrer Biomarker vor und nach 10 Wochen bzw. nach dem CBC-Training verglichen, womit das Potential des Trainings zur objektiven Verbesserung partnerschaftlicher Interaktion und ihrer individuellen psychischen Belastung gemessen wird.

Mögliche pathologische Zufallsbefunde, also Ergebnisse der Untersuchungen die für Sie gesundheitlich von erheblicher Bedeutung sind und/oder einer weiteren Untersuchung bedürfen, teilt Ihnen die Studienleitung direkt nach der Auswertung mit, sofern Sie dies im Vorfeld wünschen. Unter dem Punkt „**Zufallsbefund**“ finden Sie für jede Untersuchung beschrieben, inwieweit dies möglich ist.

#### **24- Stunden Ein-Kanal-EKG**

Am Labortag 1 (siehe Seite 2) erhalten Sie von uns im Institut für Medizinische Psychologie einen Brustgurt, wie er auch im Sportbereich eingesetzt wird, den Sie direkt anlegen und für ca. 24 Stunden tragen. Die unkomplizierte Handhabung wird Ihnen vor Ort erklärt. Dieser Gurt schränkt den Alltag kaum ein, den Sie so fortführen sollten wie immer. Die Auswertung erfolgt nach der Gurtrückgabe im Institut für Medizinische Psychologie.

**Warum?** Die Langzeitmessung der Herzfrequenz („Puls“) über 24 Stunden gibt uns Auskunft über Erholung und Entspannung. So können wir die Balance zwischen Belastung und Ruhe der biologischen Systeme Ihres Körpers untersuchen.

**Mögliche Zufallsbefunde** können hierbei nur in geringem Ausmaß festgestellt werden, da wir keine Auswertung des EKGs, sondern allein die Abstände der Herzschläge, also die Herzfrequenz (Schläge des Herzens pro Minute) auswerten. D.h. einzig eine im Durchschnitt dauerhaft deutlich erhöhte Herzfrequenz, würden wir Ihnen mitteilen, sofern Sie dies wünschen.

#### **Speichelproben**

Am Labortag 2 werden wir Sie bitten, 20 Min. vor, direkt vor, direkt nach, und 20-30 Min. nach der positiven sozialen Interaktion eine geringe Menge Speichel abzugeben (pro Entnahme ca. 1 ml, insgesamt 4 mal). Für diese Speichelproben stellen wir Ihnen nummerierte und sortierte, einfach zu handhabende Speichelröhrchen zur Verfügung und erklären die Benutzung vor Ort.

**Warum?** Psychische Belastung führt zu einer gesteigerten Aktivierung der beiden Hauptstresssysteme im Körper, dem sympathischen Nervensystem (SNS) und der Hypothalamus-Hypophysen-Nebennierenrindennachse (HHNA). Aus 4 Speichelproben pro Proband erheben wir den Verlauf der Parameter dieser Stresssysteme: **Cortisol** (HHNA), **Alpha Amylase** (indirekt SNS) und **Immunparameter Interleukin IL-1 $\beta$**  und **IL-6** (indirekt mit Stress verbunden).

**Mögliche Zufallsbefunde:**



Interleukine (IL1- $\beta$  und IL6 aus Speichel): Keine bekannt.

Alpha-Amylase: Keine bekannt.

Speichel-Cortisol: Dauerhaft erhöhtes Cortisol im Speichel kann auf ein Cushing-Syndrom bzw. Morbus Cushing hindeuten.

### Blutproben

An Labortag 1 werden wir Ihnen mit Ihrer Erlaubnis insgesamt ca. 25 ml Blut abnehmen (das entspricht etwas mehr als 2 Esslöffeln). Für die Blutentnahme ist es nicht erforderlich, dass Sie nüchtern sind. **Warum?** Bei Stressreaktionen wird im Gehirn Serotonin freigesetzt. Dies kann jedoch nicht direkt gemessen werden. Wir erfassen die Einflüsse des Stresses auf das Gehirn deshalb indirekt über die Aktivierung des **Serotonin-Transporter-Gens (SLC6A4)**, welches im Blut nachgewiesen werden kann. Zusätzlich untersuchen wir die **genetische Aktivierung des Oxytocinrezeptors (OXTR)**, der mit Stresserleben und Bindungsverhalten in Zusammenhang steht. Beides wird über sogenannte „epigenetische“ Untersuchungen bestimmt. Hierbei wird explizit **nicht** ihr Genom entschlüsselt, sondern gemessen, in wie weit die zwei oben genannten Bereiche des Erbguts von den Körperzellen *abgelesen* werden. Folglich können auch keine Erbkrankheiten o.ä. aufgedeckt werden.

Ebenfalls werden **CRP** (C-reaktives Protein; indirekt mit Stress verbunden) und nochmals Interleukin **IL1-  $\beta$  und IL-6** im Blut gemessen. Dies ist das etablierte Verfahren zur Bestimmung der Parameter bei Stress. Mit Hilfe der zusätzlichen, oben beschriebenen Bestimmung der Interleukine im Speichel möchten wir prüfen, ob sich die Blut- und Speichelwerte im Verlauf ähnlich verhalten (steigen und fallen gemeinsam), so dass direkte Schlüsse von Speichel-Interleukine auf Blut-Interleukine gezogen werden können. Falls dies der Fall wäre, könnte bei zukünftigen Untersuchungen (z.B. wissenschaftlichen Studien zum Thema Depression) bei mehrfach nachgewiesenem Zusammenhang auf eine Blutentnahme verzichtet werden. Eine Speichelentnahme würde dann ausreichen.

### Mögliche Zufallsbefunde:

Entzündungsmarker IL-1 $\beta$ , IL-6, CRP: Erhöhte Werte deuten auf eine mögliche akute oder chronische Entzündung hin. Bei Diabetes Mellitus sind auch ohne zusätzlichen psychischen Stress CRP, IL1-  $\beta$  und IL-6 erhöht. Aus diesem Grund wird zum Ausschluss eines unbekanntes Diabetes Mellitus **HbA1c**, ein Langzeitmarker des Blutzuckers, bestimmt.

HbA1c: Leicht erhöhte Werte deuten auf einen Prä-Diabetes, erhöhte Werte deuten auf einen Diabetes Mellitus Typ II hin.

Epigenetische Marker (SLC6A4; OXTR): Keine bekannt.

Hinweis: Es wird kein umfassendes Blutbild erstellt. Das heißt, diese zu Forschungszwecken durchgeführte Untersuchung ersetzt nicht eine Blutentnahme bei einem Arzt.

Speicheluntersuchung und Herzfrequenzprofilauswertung sowie die Bestimmung das Interleukin 1 $\beta$  im Blut erfolgen im Institut für Medizinische Psychologie. CRP,



HbA1c und Interleukin 6 werden im Zentrallabor des Klinikums bestimmt. Am ZI Mannheim wird die epigenetische Auswertung von SLC6A4 und OXTR-Gen durchgeführt.

### **Eye Tracking und Videoaufzeichnung**

Beides findet am Labortag 2 während der zehnminütigen positiven sozialen Interaktion statt. Für diese Aufnahmen stehen entsprechende Geräte zur Erfassung der Blickbewegung, so genannte Eye-Tracker, auf einem Tisch zwischen Ihnen und Ihrer Partnerin. Außerdem zeichnen zwei Kameras den Kopf und Oberkörper des jeweiligen Gegenübers auf (sogenannte Szenenkameras), ohne die das Eye-Tracking nicht funktionieren würde. Es kommen **keine** Geräte zum Einsatz, die am Kopf o.ä. getragen werden. Sollten Sie eine Brille oder Kontaktlinsen tragen, bitten wir Sie, diese zur Untersuchung mitzubringen. Sollten Sie beides besitzen, bringen Sie bitte Ihre Kontaktlinsen mit, da diese beim Eye-Tracking leichter auswertbare Ergebnisse liefern.

**Warum?** Der Eye-Tracker ist ein Gerät, das aufzeichnet wohin Sie blicken. In mehreren Studien wurde bereits gezeigt, dass depressiv erkrankte Menschen im Vergleich zu nicht depressiv erkrankten Menschen ein verändertes Blickverhalten aufweisen. Bis jetzt wurde dies jedoch noch nie in einer echten Gesprächssituation zweier Partner systematisch untersucht.

Wir erhoffen uns hieraus neue Erkenntnisse zu erlangen zum Beispiel zur Veränderung der Aufmerksamkeitslenkung. Die Aufnahmen der Szenenkameras erlauben außerdem eine Untersuchung der Kommunikationsmuster. Unser Ziel ist es, Unterschiede im Blickverhalten aufdecken zu können.

**Zufallsbefunde:** Keine bekannt.

## **6. Was ist das CBC-Training?**

Wenn Sie am CBC-Training teilnehmen, werden Sie Methoden erlernen, die sich auf ein positives Miteinander in der Partnerschaft beziehen. Als nicht-religiöse (säkulare) Methode bietet das Training verschiedene Wege an, Mitgefühl gegenüber einem umfassenden Kreis an Menschen zu kultivieren und auszudehnen. Im Vordergrund stehen hier jedoch der Partner und die partnerschaftliche Beziehung.

Die darin beinhalteten Praktiken unterstützen die Entwicklung einer Vielzahl von positiven Qualitäten, Erfahrungen und Verhaltensweisen, wie z.B. Freundlichkeit, Dankbarkeit, als auch Empathie und Mitgefühl. Die fundamentale Grundannahme ist, dass Mitgefühl als eine Persönlichkeitseigenschaft entwickelt und erweitert werden kann. Diese Annahme wird durch aktuelle Forschungsergebnisse unterstützt.

Dieses CBC-Training kombiniert gedankliche Komponenten und Übungen (u.a. Ist-zustandsanalyse, Achtsamkeits- und Mitgefühlsmeditationen) und solche, die die Partnerschaft und das soziale Miteinander betreffen (z.B. Empathietraining). In standardisierten Labortests wurde bereits gezeigt, dass ein solches Training die psychische und körperliche Stress- und Immunantwort bei gesunden Individuen verbessert. Ob sich das Training auch bei Menschen mit Depressionen und auf die



Belastungen von Seiten des Partners entsprechend positiv auswirkt, und ob es einen positiven Einfluss auf die partnerschaftliche Interaktion hat, ist bisher noch nicht erforscht.

Die Teilnahme an einem CBC-Training über 10 Wochen würde nach aktuellem Stand etwa 300€ pro Person kosten. Für Sie und Ihre Partnerin ist bei entsprechender Zufallslosung dieses Training jedoch komplett **kostenfrei**.

## 7. Datenschutz und Aufbewahrung

Die von Ihnen zur Verfügung gestellten Daten und Biomaterialien werden ausschließlich für die wissenschaftliche Forschung verwendet und streng vertraulich behandelt. Ihnen wird bei der ersten Registrierung als Studienteilnehmer eine pseudonymisierte, verschlüsselte Identifikationsnummer (ID-Nummer, aufsteigend) zugeordnet. Dies ist ein Code, der auf Ihren ausgefüllten Fragebögen, Speichelproben etc. steht und keinerlei Informationen über Sie als Person beinhaltet. Alle Materialien, die gesammelt werden, werden mit dieser Nummer versehen. Nur die in Papierform vorliegende Einwilligungserklärung wird sowohl den Namen, als auch diese ID-Nummer enthalten und separat von allen Daten 2-fach verschlossen aufbewahrt werden. Es werden keine Daten mit dem Namen, sondern nur mit Ihrer ID-Nummer analysiert und es gibt außer über die Einwilligungserklärung keinen Weg, den Namen mit der ID-Nummer zu verbinden. Alle psychologischen und körperlichen Daten werden ausschließlich über ID-Nummern kenntlich gemacht. Keine Publikation dieses Projekts wird Ihren Namen preisgeben. Darüber hinaus werden die Ergebnisse sämtlicher Datenanalysen getrennt von Ihren personenbezogenen Daten gespeichert und können nicht ohne Mitwirkung der Projekt- oder Studienleitung Ihrer Person zugeordnet werden.

Diese Studie wird überwiegend aus öffentlichen Mitteln (z.B. der Deutschen Forschungsgemeinschaft DFG) finanziert. In Zukunft ergeben sich möglicherweise neue wissenschaftliche Fragestellungen, die im Rahmen des oben genannten Forschungsbereiches mithilfe der bereits erhobenen Daten oder Biomaterialien beantwortet werden können. Eine Veröffentlichung der Daten kann folglich bei der Beantwortung dieser neuen Fragestellungen helfen, wodurch vergleichbare Daten nicht nochmals erhoben werden müssten und öffentliche Mittel dadurch effizienter genutzt werden könnten.

Die erhobenen Daten werden dazu nach Beendigung der Studie der nationalen und internationalen Wissenschaft in anonymisierter Form durch eine Veröffentlichung über das Forschungsdatenrepositorium der Universität Heidelberg „heiDATA“ zugänglich gemacht. Dies dient zusätzlich der wissenschaftlichen Qualitätssicherung im Sinne der Nachvollziehbarkeit der erbrachten Studienergebnisse. Eine Aufbewahrung der Daten bei heiDATA erfolgt **ohne** persönliche Identifikatoren (z.B. Name oder Kontaktdaten).



Die auf diese Weise veröffentlichten Daten sowie auch Veröffentlichungen in wissenschaftlichen Fachartikeln, welche die Daten in anonymisierter Form verwenden, bleiben dauerhaft öffentlich verfügbar.

Die Daten, Biomaterialien und ausgefüllten Fragebögen werden Eigentum des Instituts für Medizinische Psychologie des Universitätsklinikums Heidelberg. Die Speichel- und Blutproben werden dort aufbewahrt, oder mit Ihrer ID-Nummer verschlüsselt auch an andere Labore verschickt, welche mit diesen Proben Analysen durchführen. Ein Teil der Blutproben wird vom Zentralinstitut für Seelische Gesundheit (Abteilung Genetische Epidemiologie in der Psychiatrie des Zentralinstituts für Seelische Gesundheit) in Mannheim aufbewahrt, das Ihre Blutproben mit einer anderen, separat erzeugten ID-Nummer verschlüsselt zur Analyse des genetischen Materials erhält. Alle in dieser Studie erhobenen Biomaterialien werden befristet auf maximal 10 Jahre nach Beendigung der Studie aufbewahrt. Falls in Zukunft eine wesentlich veränderte wissenschaftliche Fragestellung mithilfe Ihrer Probe untersucht werden soll, wird zuvor eine Stellungnahme der zuständigen Ethikkommission eingeholt.

## 8. Risiken und Nutzen der Teilnahme

### Risiken:

Mit dem Erheben der Fragebogendaten, der Videoaufnahmen, der Aufnahmen der Blickbewegungen, der Langzeitmessungen des Pulses und der Entnahme der Speichelproben sind keinerlei Risiken verbunden.

Mit den Blutentnahmen bestehen die Risiken, die mit einer normalen Blutentnahme verbunden sind. Die Entnahme einer Blutprobe ist in der Regel nur mit einem sehr geringen Risiko verbunden. An der Einstichstelle kann es zu leichten Schmerzen kommen oder es kann ein Bluterguss (blauer Fleck) entstehen, der evtl. einige Tage sichtbar ist. In äußerst seltenen Fällen kann auch die Bildung eines Blutgerinnsels (Thrombose), eine örtlich begrenzte Entzündung oder eine Infektion an der Einstichstelle auftreten oder es kann zu dauerhaften Schädigungen von Blutgefäßen oder Nerven kommen. Die Blutentnahmen werden von einem dazu befähigten und qualifizierten Fachpersonal (i.d.R. Arzt) durchgeführt.

Die Zuordnung zu Behandlungs- bzw. Kontrollgruppe erfolgt über ein Zufallsverfahren (sog. Randomisierung), worauf wir keinen Einfluss haben. Diejenigen die der Kontrollgruppe zugeordnet werden, erhalten von unserer Seite zunächst keine Intervention. Die übliche Wartezeit auf einen individuellen Psychotherapieplatz für die an Depression Erkrankten, kann durch eine reguläre allgemeinärztliche bzw. pharmakologische antidepressive Behandlung aufgenommen bzw. weitergeführt werden.

Für diejenigen Paare, die an dem CBC-Training teilnehmen, sind keine besonderen Risiken zu erwarten. Bisher sind keine unerwünschten Wirkungen in Verbindung





mit dem CBC-Training wissenschaftlich erfasst worden. Es sind keine körperlichen oder psychischen Gefahren zu erwarten. Durch die potenziell emotionalen Erfahrungen während der Trainingssitzungen kann es zu psychischen Reaktionen kommen, z.B. Stimmungsschwankungen. Diese Reaktionen werden in den Sitzungen jedoch berücksichtigt und als wichtige Erlebnisse in das Geschehen des Gruppentrainings einbezogen. Alle Gruppentrainings werden von Psychologen bzw. Psychotherapeuten und zusätzlich in CBCT qualifizierten Trainern, durchgeführt, sowie begleitend von erfahrenen Psychotherapeuten supervidiert.

#### **Nutzen:**

Das hier durchgeführte Forschungsvorhaben zielt auf eine Verbesserung unseres Verständnisses für die Entstehung depressiver Störungen sowie deren Therapie durch psychologische Interventionen ab. Hierbei interessiert uns explizit der Einfluss der Partnerschaft und inwiefern die Belastung des Partners hierbei eine Rolle spielt.

Für diejenigen, die an einem für Sie kostenlosen CBC-Training teilnehmen werden, liegt der persönliche Nutzen darin, dass Sie Veränderungsimpulse im Umgang mit psychischen Belastungen und vor allem des partnerschaftlichen Umgangs miteinander erhalten können. Beispielsweise könnten Sie im Verlauf des Trainings erleben, wie Sie mit einem positiveren Blick oder Gefühl Ihrer Partnerin begegnen können. Sie können Impulse für neue Verhaltensweisen erhalten und erfahren, wie es sich anfühlt, wenn Sie eine alternative Haltung zu Ihren Problemen einnehmen.

Nach Ende der Studie werden Ihnen die Gesamtergebnisse der Studie mitgeteilt. Für Ihre vollständige Teilnahme an der Studie erhält **jedes Paar** insgesamt eine Aufwandsentschädigung in Höhe von **200€, also 50€ pro Person pro Messzeitpunkt**, unbar auf ein anzugebendes Konto.

Nach vollständiger Studienteilnahme haben Sie die Möglichkeit als Dankeschön an dem gruppenbasierten Mitgefühlstraining für Paare (CBC-Training) teilzunehmen. Die Kosten hierfür werden vom Institut übernommen (circa 300€ pro Person).

### **9. Freiwilligkeit der Teilnahme**

Die Erhebung, Verarbeitung und Nutzung der Daten im Rahmen des Projektes erfolgt auf Basis der Rechtsgrundlage der freiwilligen und informierten Einwilligung der Teilnehmer (gemäß §§ 4, 4a BDSG). Sie nehmen an dieser Studie freiwillig teil. Sie können Ihre Teilnahme jederzeit auch ohne Angabe von Gründen abbrechen; dies hat keinerlei negative Konsequenzen für Ihre Kursteilnahme oder Ihre Gesundheitsversorgung. Die Zuteilung zur Trainings- oder Kontrollgruppe erfolgt über eine Zufallsauswahl, so dass wir an dieser Stelle keine persönlichen Präferenzen berücksichtigen können.

Die Untersuchungen werden nur dann durchgeführt, wenn Sie dazu freiwillig und schriftlich Ihre Einwilligung erklären.

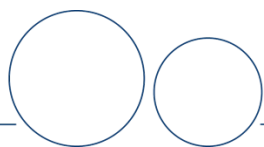

## 10. Widerrufsrecht

Sie können Ihre Einwilligung zur Verwendung Ihrer Daten und Biomaterialien jederzeit ohne Angabe von Gründen und ohne nachteilige Folgen für Sie widerrufen. Im Falle eines Widerrufs können Sie entscheiden, ob Ihre Biomaterialien vernichtet und die dazu gehörenden Daten gelöscht werden sollen oder ob Sie in anonymisierter Form für weitere Forschungsvorhaben verwendet werden dürfen. Dies gilt auch dann, wenn die verschlüsselten Daten und Blutproben zur wissenschaftlichen Analyse verschlüsselt an das ZI Mannheim weitergegeben wurden. Bereits erhobene Daten verbleiben auch nach Vernichtung des Biomaterials bzw. des Fragebogens in der Studie, soweit der Personenbezug nicht mehr besteht.

### Wenden Sie sich für einen Widerruf bitte an die zuständige Studienleitung:

Prof. Dr. phil. Dipl.- Psych. Beate Ditzen  
Institut für Medizinische Psychologie im  
Zentrum für Psychosoziale Medizin (ZPM)  
Universitätsklinikum Heidelberg  
Bergheimer Str. 20, D-69115 Heidelberg  
Tel.: +49 6221 56 8150  
E-Mail: beate.ditzen@med.uni-heidelberg.de

## 11. Erneute Kontaktaufnahme

Es besteht die Möglichkeit der Kontaktaufnahme durch die Studienleitung, wenn die Ihnen entnommenen Biomaterialien wider Erwarten Informationen enthalten, die für die Erhaltung oder Wiederherstellung Ihrer Gesundheit von erheblicher Bedeutung sind. Die Kontaktaufnahme wird durch die Studienleitung oder durch eine durch die Studienleitung beauftragte Person telefonisch, schriftlich oder per E-Mail erfolgen.

## 12. Versicherungsschutz

Für die Planung und Durchführung der Studie besteht ein Versicherungsschutz für Probanden im Rahmen der Betriebs-Haftpflichtversicherung des Universitätsklinikums Heidelberg. Der Versicherungsschutz erstreckt sich auf die gesetzliche Haftpflicht des Universitätsklinikums sowie auf die persönliche gesetzliche Haftpflicht aller im dienstlichen Auftrag für das Universitätsklinikum an der Studie mitwirkenden Mitarbeiter (Studienleiter, sonstiges Personal), beispielsweise für Schäden durch die Entnahme von Blutproben (Betriebs-/Umwelt-Haftpflicht-, Umweltschadens-Versicherung: Nr. 39327978 01116. Versicherer: HDI-Gerling Industrie Versicherung AG, HDI-Platz 1, 30659 Hannover, Telefon: +49 511 645-0, Telefax: +49 511 645-4545, E-Mail: info@hdi-gerling.de).



### 13. Weitere Informationen

Sollten Sie noch weitere Fragen haben, wenden Sie sich bitte an Ihre Studienleitung (die entsprechenden Kontaktinformationen finden Sie auf Seite 1 dieser Informationsschrift). Stellen Sie alle Fragen, die Ihnen wichtig erscheinen und lassen Sie sich ausreichend Zeit für Ihre Entscheidung zur Teilnahme an dieser wissenschaftlichen Untersuchung.

Mit freundlichen Grüßen

Dr. Corina Aguilar-Raab und Dr. Marc Jarczok  
(Projektleitung)

## SPIRIT 2013 Checklist: Recommended items to address in a clinical trial protocol and related documents

| Section/item                                             | ItemNo | Description                                                                                                                                                                                                                                                                              | Executed        |
|----------------------------------------------------------|--------|------------------------------------------------------------------------------------------------------------------------------------------------------------------------------------------------------------------------------------------------------------------------------------------|-----------------|
| <b>Administrative information</b>                        |        |                                                                                                                                                                                                                                                                                          |                 |
| Title                                                    | 1      | Descriptive title identifying the study design, population, interventions, and, if applicable, trial acronym                                                                                                                                                                             | ✓ p.1           |
| Trial registration                                       | 2a     | Trial identifier and registry name. If not yet registered, name of intended registry                                                                                                                                                                                                     | ✓ p.2           |
|                                                          | 2b     | All items from the World Health Organization Trial Registration Data Set                                                                                                                                                                                                                 |                 |
| Protocol version                                         | 3      | Date and version identifier                                                                                                                                                                                                                                                              | ✓ p.1           |
| Funding                                                  | 4      | Sources and types of financial, material, and other support                                                                                                                                                                                                                              | ✓ p.24-25       |
| Roles and responsibilities                               | 5a     | Names, affiliations, and roles of protocol contributors                                                                                                                                                                                                                                  | ✓ p.1 & p.24-25 |
|                                                          | 5b     | Name and contact information for the trial sponsor                                                                                                                                                                                                                                       | not applicable  |
|                                                          | 5c     | Role of study sponsor and funders, if any, in study design; collection, management, analysis, and interpretation of data; writing of the report; and the decision to submit the report for publication, including whether they will have ultimate authority over any of these activities | not applicable  |
|                                                          | 5d     | Composition, roles, and responsibilities of the coordinating centre, steering committee, endpoint adjudication committee, data management team, and other individuals or groups overseeing the trial, if applicable (see Item 21a for data monitoring committee)                         | not applicable  |
| <b>Introduction</b>                                      |        |                                                                                                                                                                                                                                                                                          |                 |
| Background and rationale                                 | 6a     | Description of research question and justification for undertaking the trial, including summary of relevant studies (published and unpublished) examining benefits and harms for each intervention                                                                                       | ✓ p.4-9         |
|                                                          | 6b     | Explanation for choice of comparators                                                                                                                                                                                                                                                    | ✓ p.14-16       |
| Objectives                                               | 7      | Specific objectives or hypotheses                                                                                                                                                                                                                                                        | ✓ p.9           |
| Trial design                                             | 8      | Description of trial design including type of trial (eg, parallel group, crossover, factorial, single group), allocation ratio, and framework (eg, superiority, equivalence, noninferiority, exploratory)                                                                                | ✓ p.10          |
| <b>Methods: Participants, interventions and outcomes</b> |        |                                                                                                                                                                                                                                                                                          |                 |

|                                                                     |     |                                                                                                                                                                                                                                                                                                                                                                                |           |
|---------------------------------------------------------------------|-----|--------------------------------------------------------------------------------------------------------------------------------------------------------------------------------------------------------------------------------------------------------------------------------------------------------------------------------------------------------------------------------|-----------|
| Study setting                                                       | 9   | Description of study settings (eg, community clinic, academic hospital) and list of countries where data will be collected. Reference to where list of study sites can be obtained                                                                                                                                                                                             | ✓ p.10-11 |
| Eligibility criteria                                                | 10  | Inclusion and exclusion criteria for participants. If applicable, eligibility criteria for study centres and individuals who will perform the interventions (eg, surgeons, psychotherapists)                                                                                                                                                                                   | ✓ p.10-11 |
| Interventions                                                       | 11a | Interventions for each group with sufficient detail to allow replication, including how and when they will be administered                                                                                                                                                                                                                                                     | ✓ p.14-17 |
|                                                                     | 11b | Criteria for discontinuing or modifying allocated interventions for a given trial participant (eg, drug dose change in response to harms, participant request, or improving/worsening disease)                                                                                                                                                                                 | ✓ p.16    |
|                                                                     | 11c | Strategies to improve adherence to intervention protocols, and any procedures for monitoring adherence (eg, drug tablet return, laboratory tests)                                                                                                                                                                                                                              | ✓ p.17    |
|                                                                     | 11d | Relevant concomitant care and interventions that are permitted or prohibited during the trial                                                                                                                                                                                                                                                                                  | ✓ p.10-11 |
| Outcomes                                                            | 12  | Primary, secondary, and other outcomes, including the specific measurement variable (eg, systolic blood pressure), analysis metric (eg, change from baseline, final value, time to event), method of aggregation (eg, median, proportion), and time point for each outcome. Explanation of the clinical relevance of chosen efficacy and harm outcomes is strongly recommended | ✓ p.17-21 |
| Participant timeline                                                | 13  | Time schedule of enrolment, interventions (including any run-ins and washouts), assessments, and visits for participants. A schematic diagram is highly recommended (see Figure)                                                                                                                                                                                               | ✓ fig.3   |
| Sample size                                                         | 14  | Estimated number of participants needed to achieve study objectives and how it was determined, including clinical and statistical assumptions supporting any sample size calculations                                                                                                                                                                                          | ✓ p.21-22 |
| Recruitment                                                         | 15  | Strategies for achieving adequate participant enrolment to reach target sample size                                                                                                                                                                                                                                                                                            | ✓ p.10    |
| <b>Methods: Assignment of interventions (for controlled trials)</b> |     |                                                                                                                                                                                                                                                                                                                                                                                |           |
| <b>Allocation:</b>                                                  |     |                                                                                                                                                                                                                                                                                                                                                                                |           |

|                                              |                                                           |     |                                                                                                                                                                                                                                                                                                                                                                                                              |                |
|----------------------------------------------|-----------------------------------------------------------|-----|--------------------------------------------------------------------------------------------------------------------------------------------------------------------------------------------------------------------------------------------------------------------------------------------------------------------------------------------------------------------------------------------------------------|----------------|
| 1<br>2<br>3<br>4<br>5<br>6<br>7<br>8<br>9    | Sequence generation                                       | 16a | Method of generating the allocation sequence (eg, computer-generated random numbers), and list of any factors for stratification. To reduce predictability of a random sequence, details of any planned restriction (eg, blocking) should be provided in a separate document that is unavailable to those who enrol participants or assign interventions                                                     | ✓ p.13-14      |
| 10<br>11<br>12                               | Allocation concealment mechanism                          | 16b | Mechanism of implementing the allocation sequence (eg, central telephone; sequentially numbered, opaque, sealed envelopes), describing any steps to conceal the sequence until interventions are assigned                                                                                                                                                                                                    | ✓ p.13-14      |
| 13<br>14                                     | Implementation                                            | 16c | Who will generate the allocation sequence, who will enrol participants, and who will assign participants to interventions                                                                                                                                                                                                                                                                                    | ✓ p.13-14      |
| 15<br>16<br>17                               | Blinding (masking)                                        | 17a | Who will be blinded after assignment to interventions (eg, trial participants, care providers, outcome assessors, data analysts), and how                                                                                                                                                                                                                                                                    | ✓ p.13-14      |
| 18<br>19                                     |                                                           | 17b | If blinded, circumstances under which unblinding is permissible, and procedure for revealing a participant's allocated intervention during the trial                                                                                                                                                                                                                                                         | ✓ p.13-14      |
| 20<br>21<br>22                               | <b>Methods: Data collection, management, and analysis</b> |     |                                                                                                                                                                                                                                                                                                                                                                                                              |                |
| 23<br>24<br>25<br>26<br>27                   | Data collection methods                                   | 18a | Plans for assessment and collection of outcome, baseline, and other trial data, including any related processes to promote data quality (eg, duplicate measurements, training of assessors) and a description of study instruments (eg, questionnaires, laboratory tests) along with their reliability and validity, if known. Reference to where data collection forms can be found, if not in the protocol | ✓ p.11-21      |
| 28<br>29<br>30                               |                                                           | 18b | Plans to promote participant retention and complete follow-up, including list of any outcome data to be collected for participants who discontinue or deviate from intervention protocols                                                                                                                                                                                                                    | ✓ p.11-13      |
| 31<br>32<br>33                               | Data management                                           | 19  | Plans for data entry, coding, security, and storage, including any related processes to promote data quality (eg, double data entry; range checks for data values). Reference to where details of data management procedures can be found, if not in the protocol                                                                                                                                            | ✓ p.21,22 & 24 |
| 34<br>35<br>36                               | Statistical methods                                       | 20a | Statistical methods for analysing primary and secondary outcomes. Reference to where other details of the statistical analysis plan can be found, if not in the protocol                                                                                                                                                                                                                                     | ✓ p.21         |
| 37<br>38<br>39<br>40<br>41<br>42<br>43<br>44 |                                                           | 20b | Methods for any additional analyses (eg, subgroup and adjusted analyses)                                                                                                                                                                                                                                                                                                                                     | not applicable |

|                                 |     |                                                                                                                                                                                                                                                                                                                                       |                |
|---------------------------------|-----|---------------------------------------------------------------------------------------------------------------------------------------------------------------------------------------------------------------------------------------------------------------------------------------------------------------------------------------|----------------|
|                                 | 20c | Definition of analysis population relating to protocol non-adherence (eg, as randomised analysis), and any statistical methods to handle missing data (eg, multiple imputation)                                                                                                                                                       | ✓ p.21         |
| <b>Methods: Monitoring</b>      |     |                                                                                                                                                                                                                                                                                                                                       |                |
| Data monitoring                 | 21a | Composition of data monitoring committee (DMC); summary of its role and reporting structure; statement of whether it is independent from the sponsor and competing interests; and reference to where further details about its charter can be found, if not in the protocol. Alternatively, an explanation of why a DMC is not needed | not applicable |
|                                 | 21b | Description of any interim analyses and stopping guidelines, including who will have access to these interim results and make the final decision to terminate the trial                                                                                                                                                               | not applicable |
| Harms                           | 22  | Plans for collecting, assessing, reporting, and managing solicited and spontaneously reported adverse events and other unintended effects of trial interventions or trial conduct                                                                                                                                                     | not applicable |
| Auditing                        | 23  | Frequency and procedures for auditing trial conduct, if any, and whether the process will be independent from investigators and the sponsor                                                                                                                                                                                           | not applicable |
| <b>Ethics and dissemination</b> |     |                                                                                                                                                                                                                                                                                                                                       |                |
| Research ethics approval        | 24  | Plans for seeking research ethics committee/institutional review board (REC/IRB) approval                                                                                                                                                                                                                                             | ✓ p.23-24      |
| Protocol amendments             | 25  | Plans for communicating important protocol modifications (eg, changes to eligibility criteria, outcomes, analyses) to relevant parties (eg, investigators, REC/IRBs, trial participants, trial registries, journals, regulators)                                                                                                      | ✓ p.24         |
| Consent or assent               | 26a | Who will obtain informed consent or assent from potential trial participants or authorised surrogates, and how (see Item 32)                                                                                                                                                                                                          | ✓ p.23-24      |
|                                 | 26b | Additional consent provisions for collection and use of participant data and biological specimens in ancillary studies, if applicable                                                                                                                                                                                                 | not applicable |
| Confidentiality                 | 27  | How personal information about potential and enrolled participants will be collected, shared, and maintained in order to protect confidentiality before, during, and after the trial                                                                                                                                                  | ✓ p.24         |
| Declaration of interests        | 28  | Financial and other competing interests for principal investigators for the overall trial and each study site                                                                                                                                                                                                                         | ✓ p.24         |
| Access to data                  | 29  | Statement of who will have access to the final trial dataset, and disclosure of contractual agreements that limit such access for investigators                                                                                                                                                                                       | ✓ p.24         |
| Ancillary and post-trial care   | 30  | Provisions, if any, for ancillary and post-trial care, and for compensation to those who suffer harm from trial participation                                                                                                                                                                                                         | not applicable |

|                            |     |                                                                                                                                                                                                                                                                                     |                |
|----------------------------|-----|-------------------------------------------------------------------------------------------------------------------------------------------------------------------------------------------------------------------------------------------------------------------------------------|----------------|
| Dissemination policy       | 31a | Plans for investigators and sponsor to communicate trial results to participants, healthcare professionals, the public, and other relevant groups (eg, via publication, reporting in results databases, or other data sharing arrangements), including any publication restrictions | ✓ p.24         |
|                            | 31b | Authorship eligibility guidelines and any intended use of professional writers                                                                                                                                                                                                      | not applicable |
|                            | 31c | Plans, if any, for granting public access to the full protocol, participant-level dataset, and statistical code                                                                                                                                                                     | ✓ p.24         |
| <b>Appendices</b>          |     |                                                                                                                                                                                                                                                                                     |                |
| Informed consent materials | 32  | Model consent form and other related documentation given to participants and authorised surrogates                                                                                                                                                                                  | ✓ app. 2-4     |
| Biological specimens       | 33  | Plans for collection, laboratory evaluation, and storage of biological specimens for genetic or molecular analysis in the current trial and for future use in ancillary studies, if applicable                                                                                      | ✓ p.18-21      |



# BMJ Open

## Enhancing Social Interaction in Depression (SIDE Study) – Protocol of a randomized controlled trial on the effects of a Cognitively-Based-Compassion-Training (CBCT®) for Couples

|                                 |                                                                                                                                                                                                                                                                                                                                                                                                                                                                                                                                                                                                                                                                                                                                                                                                                               |
|---------------------------------|-------------------------------------------------------------------------------------------------------------------------------------------------------------------------------------------------------------------------------------------------------------------------------------------------------------------------------------------------------------------------------------------------------------------------------------------------------------------------------------------------------------------------------------------------------------------------------------------------------------------------------------------------------------------------------------------------------------------------------------------------------------------------------------------------------------------------------|
| Journal:                        | <i>BMJ Open</i>                                                                                                                                                                                                                                                                                                                                                                                                                                                                                                                                                                                                                                                                                                                                                                                                               |
| Manuscript ID                   | bmjopen-2017-020448.R2                                                                                                                                                                                                                                                                                                                                                                                                                                                                                                                                                                                                                                                                                                                                                                                                        |
| Article Type:                   | Protocol                                                                                                                                                                                                                                                                                                                                                                                                                                                                                                                                                                                                                                                                                                                                                                                                                      |
| Date Submitted by the Author:   | 24-May-2018                                                                                                                                                                                                                                                                                                                                                                                                                                                                                                                                                                                                                                                                                                                                                                                                                   |
| Complete List of Authors:       | Aguilar-Raab, Corina; UniversitätsKlinikum Heidelberg, Institute of Medical Psychology<br>Jarczok, Marc; University Hospital Ulm, Clinic of Psychosomatic Medicine and Psychotherapy<br>Warth, Marco; UniversitätsKlinikum Heidelberg, Institute of Medical Psychology<br>Stoffel, Martin; UniversitätsKlinikum Heidelberg, Institute of Medical Psychology<br>Tieck, Maria; UniversitätsKlinikum Heidelberg, Institute of Medical Psychology<br>Berg, Judith; UniversitätsKlinikum Heidelberg, Institute of Medical Psychology<br>Negi, Lobsang; Emory College, Emory University, Department of Religion<br>Harrison, Tim; CBCT® Teacher Training, Emory University, Emory-Tibet Partnership<br>Pace, Thaddeus; The University of Arizona<br>Ditzen, Beate; UniversitätsKlinikum Heidelberg, Institute of Medical Psychology |
| <b>Primary Subject Heading</b>: | Mental health                                                                                                                                                                                                                                                                                                                                                                                                                                                                                                                                                                                                                                                                                                                                                                                                                 |
| Secondary Subject Heading:      | Mental health                                                                                                                                                                                                                                                                                                                                                                                                                                                                                                                                                                                                                                                                                                                                                                                                                 |
| Keywords:                       | Depression & mood disorders < PSYCHIATRY, study protocol, mindfulness- and compassion based intervention, psychobiological indicators of health                                                                                                                                                                                                                                                                                                                                                                                                                                                                                                                                                                                                                                                                               |
|                                 |                                                                                                                                                                                                                                                                                                                                                                                                                                                                                                                                                                                                                                                                                                                                                                                                                               |

SCHOLARONE™  
Manuscripts

1  
2  
3 Enhancing Social Interaction in Depression (SIDE Study) – Protocol of a  
4 randomized controlled trial on the effects of a Cognitively-Based-Compassion-  
5 Training (CBCT®) for Couples  
6  
7  
8  
9

10  
11 Corina Aguilar-Raab<sup>1</sup>★, Marc N. Jarczok<sup>1,2</sup>★, Marco Warth<sup>1</sup>, Martin Stoffel<sup>1</sup>, Maria Tieck<sup>1</sup>,  
12  
13 Judith Berg<sup>1</sup>, Lobsang Tenzin Negi<sup>3</sup>, Tim Harrison<sup>4</sup>, Thaddeus W.W. Pace<sup>5</sup>, & Beate Ditzen<sup>1</sup>  
14  
15

16  
17 <sup>1</sup> Institute of Medical Psychology, Center for Psychosocial Medicine, University Hospital,  
18  
19 Heidelberg University, Heidelberg, Germany  
20

21  
22 <sup>2</sup> Department of Psychosomatic Medicine and Psychotherapy, University Clinic Ulm, 89081  
23  
24 Ulm, Germany  
25

26  
27 <sup>3</sup> Emory-Tibet Partnership, Center for Contemplative Science and Compassion-Based Ethics,  
28  
29 Department of Religion, Emory College, Emory University, Atlanta, GA, USA  
30

31  
32 <sup>4</sup> Emory-Tibet Partnership, Center for Contemplative Science and Compassion-Based Ethics,  
33  
34 CBCT® Teacher Training, Emory University, Atlanta, GA, USA  
35

36  
37 <sup>5</sup> College of Nursing, College of Medicine (Department of Psychiatry), College of Science  
38  
39 (Department of Psychology), University of Arizona, Tucson, AZ, USA  
40

41  
42 ★Shared first authorship. These authors contributed equally to the manuscript.  
43  
44

45 **Corresponding author:**

46  
47 Corina Aguilar-Raab  
48  
49 Institute of Medical Psychology, Center for Psychosocial Medicine, University Hospital,  
50  
51 Heidelberg University

52 Bergheimer Str. 20, 69115 Heidelberg, Germany

53  
54 Phone: +49 6221 56-8135

55  
56 E-mail: corina.aguilar-raab@med.uni-heidelberg.de

57  
58 Word count: 11.154 (version: v3; Date: 02/15/2018)  
59

## Abstract

Introduction: Positive social interactions and stable relationships can exert substantial benefits on health. However, patients suffering from depression benefit less from these health-promoting effects. Moreover, relationship quality and even partners' health has been found to be negatively affected by depressive symptomatology, which may result in overall impairments in social functioning of a romantic couple. Psychobiological research indicates that these impairments may be accompanied by a maladaptive regulation of the patient's neuroendocrine response to external stressors. Concerning the improvement of social functioning, first studies showed promising results of Cognitively-Based-Compassion-Training (CBCT®). However, randomized trials are still scarce. Previous programs did not involve participation of the patient's romantic partner. Therefore, the present study aims to investigate whether a CBCT® program adapted for couples (CBCT®-fC) can improve depressive symptoms, distress, social interaction skills, and the neurobiological regulation of stress.

Methods and Analysis: Couples with the female partner suffering from depression will be invited to participate in a pre-to-post intervention assessment on two consecutive days, respectively, involving a standardized positive social interaction (PSI) task, eye-tracking, electrocardiogram-recordings, saliva- and blood-sampling, and questionnaire data. After baseline assessment, participating couples will be randomized to either a 10-week CBCT®-fC or to a treatment as usual control condition. The primary endpoint is the reduction of depressive symptoms measured by the Hamilton Depression Rating Scale. Secondary outcomes encompass self-rated depression (Beck Depression Inventory), attention toward the partners face during PSI (eye tracking), stress-related biomarkers (cortisol,  $\alpha$ -amylase, interleukin (IL)-1 $\beta$ /-6, heart rate variability), methylation of oxytocin-receptor- and serotonin-transporter-genes, and self-ratings of psychological constructs such as relationship quality and empathy.

Ethics and Dissemination: Ethical approval has been obtained by the Ethics Committee of the Medical Faculty Heidelberg. Results will be presented in international, peer-reviewed journals and on conferences in the field of clinical psychology and psychiatry.

Trial registration: From ClinicalTrials.gov., Identifier: NCT03080025 (registered: 08.03.2017).

## Strengths and limitations:

- This is the first randomized controlled trial to investigate the effects of a group-based compassion meditation program for couples (CBCT<sup>®</sup>-fC).
- We focus on females suffering from depression.
- The study employs novel methods, assessing positive real-time social interaction of romantic partners in combination with psychobiological indicators of health.
- Several processes previously reported to be involved in the etiology and basic mechanisms of social functioning that are part of the psychopathology of depression are investigated simultaneously.
- Comparison with TAU control group does not allow one to draw conclusions about the specificity of CBCT<sup>®</sup>-fC.

## Background

Depression is one of the most prevalent mental disorders worldwide.[1, 2] Besides changes in self-referential affect and cognition, depressive disorders have been associated with social deficits. Impaired social functioning of depressive patients could account for both a worsening of the illness to chronic levels, and for a generally degraded physical health status, which in turn, may be accompanied by severe alterations of the biological stress and immune systems.[1, 3] It is crucial to examine how depressive patients' impaired social functioning maintains and/or aggravates the overall impact of the illness, and how disease progression interacts with the close social environment around a patient, in particular with the supportive partner.[4]

### Impaired social functioning in depression

Positive social interactions can exert substantial benefits on health and even survival rates of individuals.[3, 5] For the majority of adults, couple relationships represent the central social bond and are the main source of social support.[6] However, patients with chronic mental illnesses, such as depression, seem to benefit less from these health-protective effects. Current research has shown a bidirectional association between depression and relationship quality.[7] Problematic relationships may reinforce depressive symptoms in the romantic partners. However, depression and subsequent deficiencies in social functioning are strongly associated with a decrease in marital quality.[8, 9] Consequently, depression also affects the romantic partner and his/her health.[10]

The incapacities for those with depression to socially connect and affiliate with others might lead to a tendency for social withdrawal and non-approaching behavior. Depressed individuals tend to be afraid of social rejection and the subsequent negative emotions, and expect less support and kindness from others.[11] This may be accompanied by a reduced capacity to adaptively engage in social interaction and communication, and a diminished ability for empathic accuracy and perspective taking.[12]

Underlying this, depressed individuals have been found to exhibit biased information processing including a distorted attention for social stimuli.[13] Hence, impaired processing and attentional disengagement from negative self-referencing information take place, i.e. reduced maintenance of gaze towards positive stimuli, and in contrast, increased

1  
2  
3 maintenance of gaze towards negative stimuli.[14, 15] It is likely that this biased cognitive  
4 information processing may transfer to marital interaction as well.  
5  
6  
7

### 8 **Psychobiological underpinnings**

9  
10 While more research is still needed in order to understand how social-cognitive processes in  
11 couples may affect physical health outcomes[7], it seems consistent that severe or chronic  
12 depression is associated with alterations in the psychobiological stress and immune systems,  
13 including cortisol,[16, 17] alpha-amylase (sAA),[18, 19] vagally mediated heart rate variability  
14 (vmHRV),[20] and pro-inflammatory cytokine regulation (IL-6 and IL-1 $\beta$ , and high sensitive C-  
15 reactive protein (hsCRP).[21] Additionally, stress-associated alterations of methylation  
16 patterns in the gene encoding the serotonin transporter activation (SLC6A4) have been  
17 found in patients with depression.[22]

18  
19 Maladaptive alterations in the hypothalamic-pituitary-adrenal (HPA) system's response to  
20 chronic stress have been proposed as a potential pathophysiological mechanism in the  
21 development of depressive disorders, with dysregulation of glucocorticoid release (in  
22 particular cortisol) being one of the most frequently studied phenomena.[23, 24] Changes in  
23 the diurnal rhythms of cortisol release may in part be responsible for disordered circadian  
24 physiology involving sleep patterns and body temperature rhythms. Increased levels of  
25 morning cortisol may be a risk factor for subsequent depression.[16, 25] Moreover, a meta-  
26 analysis by Stetler and Miller found higher basal cortisol levels in depressed individuals[26].  
27 Similar, depressed versus healthy individuals showed elevated cortisol release in response to  
28 acute psychosocial stress challenge.[17] The magnitude and direction of these cortisol  
29 effects, however, were found to be strongly dependent on moderating variables such as  
30 methodological quality, type of cortisol assessment, sex, measurement time, or type of  
31 stress task.[17, 26] In particular, women with remitted depression showed a blunted cortisol  
32 response to a psychologically stressful task compared to healthy controls, while cortisol  
33 reactivity was increased in depressed men.[27, 28] Together these findings suggest that  
34 more research is needed, although there is evidence for HPA-axis dysregulation in major  
35 depression.  
36  
37

38  
39 Concerning the human stress response, the HPA axis interacts with the autonomic nervous  
40 system (ANS) in the context of both acute and chronic stress challenge situations. Recent  
41 studies highlight the importance of monitoring both systems simultaneously, in order to gain  
42  
43  
44  
45  
46  
47  
48  
49  
50  
51  
52

1  
2  
3 a better understanding of the pathophysiological mechanisms involved with depression.[18]  
4 Available evidence suggests that acute stress is related to higher momentary salivary alpha-  
5 amylase (sAA) activity. sAA is an enzyme mainly secreted by the parotid glands in response  
6 to adrenergic innervation, and has been studied as a proxy for the sympatho-adreno-  
7 medullary (SAM) branch of the ANS. sAA stimulation may involve activation of further  
8 physiological sub-systems (e.g. parasympathetic fibers)[29], and prior studies suggest that  
9 acute sAA changes may reflect ANS dysfunction in patients with mental disorders.[19]  
10 Furthermore, sAA secretion has been associated with depression and feelings of shame.[30,  
11 31] In addition, sAA levels have been found to be significantly higher before and after an  
12 electrical stimulation stressor in depressed individuals than in healthy controls.[28] While  
13 some authors have raised issues about the validity of sAA as a biomarker of SAM  
14 activation[29], others highlight the potential of sAA to monitor SAM along with HPA activity  
15 in saliva (instead of in blood).[18, 19, 30]

16  
17  
18  
19  
20  
21  
22  
23  
24  
25  
26 Previous research investigating the involvement of the parasympathetic branch of the ANS in  
27 the pathophysiology of depression has focused mainly on the study of vmHRV. Compared to  
28 healthy individuals, depressed patients have been found to exhibit parasympathetic  
29 withdrawal, and prior studies have reported a negative association between depressive  
30 symptoms and resting state short-term measures of vmHRV.[20, 32] In contrast, higher  
31 levels of sadness have been associated with increased *circadian* variation of vmHRV  
32 measures, but only in females.[32] Similar, we investigated the circadian variation pattern by  
33 mild depressive symptoms in a large, rather healthy occupational sample. Depressive  
34 symptoms were found to be negatively associated with the 24h mean (MESOR) and  
35 oscillation amplitude in men but positively associated in women. This pattern of findings  
36 indicates a blunted day-night rhythm of vagal activity in men with greater depressive  
37 symptoms as well as a moderation effect of sex in the association of CVP and depressive  
38 symptoms.[33] Moreover, we have shown in a study with nonhuman primates that greater  
39 amounts of depressive-like behavior is associated with elevated levels of vmHRV in adult  
40 female cynomolgus monkeys (*Macaca fascicularis*).[34] We believe that this finding is  
41 evidence of a cross-species psychophysiological alterations of heart rate variability in  
42 depression.

43  
44  
45  
46  
47  
48  
49  
50  
51  
52  
53  
54  
55 Stress-related chronic HPA-axis and ANS dysfunctions can promote the release of cytokines  
56 from the macrophages, resulting in symptoms of fatigue and loss of appetite.[21, 35]

1  
2  
3 Depressed patients exhibit higher circulating concentrations of pro-inflammatory cytokines,  
4 particularly interleukin (IL)-6 and IL-1 $\beta$ , which were found to be indicative of a non-specific  
5 immune response (i.e. without an identifiable pathogen or injury to tissues).[36, 37] In line  
6 with these findings, administration of cytokines in animal models and humans results in  
7 behavioral symptoms that are common in depression, such as depressive mood or slowed  
8 psychomotor activity.[21]

9  
10  
11  
12  
13 The vulnerability for depression – especially with regard to early adversity – is also believed  
14 to involve genetic factors, in combination with environmental exposure across the lifespan.  
15 Gene-environment interactions have been found to alter the risk for the development of  
16 major depression. Altered gene expression is rooted in changes in chromatin structure, and  
17 alterations in these epigenetic marks are connected to depression.[38] Changes in  
18 methylation in the promoter of the serotonin transporter gene SLC6A4 have been focused in  
19 several studies investigating depression. For example, decreased methylation of SLC6A4 has  
20 been found in stress-exposed shift-working nurses, and was also related to burnout.[39]  
21 However, in contrast, increased methylation was described in depressed patients with low  
22 quality of life and functioning.[e.g. 22] These diverse findings may be due to the analysis of  
23 different Cytosin-phosphatidyl-Guanin, or CpG sites in each study.[38] Thus, while overall  
24 methylation of serotonin transporter genes and their expression seem significantly  
25 associated with the reactivity of HPA-axis and ANS in depression,[40, 41] the precise  
26 direction of each specific alteration in the related CpGs needs further investigation. In  
27 accordance with SLC6A4 data, oxytocin receptor gene (OXTR) methylation patterns have  
28 been associated to neural activity to the perception/cognition of social stimuli[42] and  
29 relationship functioning.[43] In previous studies, interpersonal functioning – like rejection  
30 sensitivity or less support seeking, which is predominant in depressed individuals – was  
31 linked to OXTR gene polymorphisms.[44] To date, it remains unclear whether serotonin or  
32 oxytocin related epigenetic processes underlie alterations of interpersonal functioning in  
33 depression and might be interpreted as evaluation criteria for therapy. For example, SLC6A4  
34 methylation has been associated with the responsiveness of patients to pharmacological  
35 anti-depressive treatment, and treatment with selective serotonin reuptake inhibitors has  
36 been found to result in higher levels of methylation of SLC6A4[45], and lower levels of  
37 methylation in neuroblastoma cells treated with quetiapine.[46] Besides pharmacologically  
38 induced alterations in epigenetic patterns, a new area in psychiatric research suggests that  
39  
40  
41  
42  
43  
44  
45  
46  
47  
48  
49  
50  
51  
52  
53  
54  
55  
56  
57  
58  
59  
60



1  
2  
3 epigenetic mechanisms are not only involved in psychopathology, but also in the  
4 development of resilience[47] and responsiveness of patients with mental disorder to  
5 behavioral interventions.[48] Within this framework, SLC6A4 methylation has been shown to  
6 be increased in individuals with social anxiety, but only those who respond to cognitive  
7 behavioral therapy.[49] In addition, the severity of depressive symptoms has been shown to  
8 be associated with levels of SLC6A4 methylation[50], indicating a covariation of the two.  
9 These findings also suggest that SLC6A4 methylation may be susceptible to change as a  
10 result of interventions that target depressive symptoms.  
11  
12  
13  
14  
15  
16  
17

### 18 **Mindfulness, compassion and compassion-based interventions**

19  
20 Mindfulness is defined as the intentional directing of attention towards the present  
21 moment, combined with an attitude of acceptance and non-reactivity.[51-53] Mindfulness  
22 can be trained and increased through sustainable exercise, such as breathing meditation. It  
23 is associated with coping-strategies in achieving a healthier or better handling with the inner  
24 stress-response towards perceived stressors.  
25  
26  
27

28 Subsequent to the successful implementation of the Mindfulness Based Stress Reduction  
29 (MBSR) program[54-57], more scrutiny has been placed on understanding the mechanisms  
30 of how mindfulness promotes positive change for greater well-being. In a recent study, we  
31 could show that enhanced mindfulness as a result of MBSR participation is accompanied by  
32 two other important health-related psychological constructs – distress tolerance and  
33 resilience.[58] In addition to other refined and revised approaches, such as the Mindfulness  
34 Based Cognitive Therapy (MBCT),[59, 60] current research in the field of “contemplative  
35 studies” has begun to focus more on compassion and interventions such as the Cognitively-  
36 Based Compassion Training (CBCT®).[61-63] The definition of compassion highlights social  
37 aspects explicitly: in addition to the competency to recognize sorrowful states, compassion  
38 includes the prosocial motivation to deal with determining factors of suffering, and to  
39 contribute to their change.[64]  
40  
41  
42  
43  
44  
45  
46  
47  
48

49 Secular meditation trainings that address loving kindness and compassion can enhance  
50 positive emotions and social support, which are associated with perceived social  
51 connectedness.[65, 66] Furthermore, they can lead to faster cortisol recovery subsequent to  
52 a social stress test as well as reduced responsiveness of inflammation to psychosocial  
53  
54  
55  
56  
57  
58  
59  
60

1  
2  
3 stress.[67] However, studies (either laboratory or intervention) shedding light into the  
4 interplay between psychological and biological factors are still rare.

5  
6 Mindfulness has already been successfully integrated into the context of couples, such as  
7 mindfulness-based relationship enhancement,[68] and improving relationship satisfaction  
8 and functioning.[68-70] As far as couples are concerned, no study has yet investigated the  
9 impact of compassion enhancement on aspects of relationship quality. Current findings  
10 suggest that strong connections may be found between self-compassion and aspects of  
11 healthy interpersonal relationship functioning such as increased caring, kindness, and higher  
12 levels of relatedness.[71] Moreover, higher self-compassion has been positively associated  
13 with compromise behavior in the context of romantic relationships.[72] Given this  
14 background, we believe the application of compassion training to depressive patients with  
15 impairments in interaction skills and their partners is a promising approach. Moreover, a  
16 group-based couple intervention additionally takes into account the partner's needs, and  
17 may therefore provide a better integration of intervention benefits into patient couples'  
18 daily life.

19  
20 We therefore adapted a group-based compassion meditation training program (see below)  
21 for couples, intending to improve social interactional functioning in couples where one  
22 member of the dyad is diagnosed with depression. The project will also work in a preliminary  
23 manner to determine if the compassion meditation training program is associated with  
24 positive change in psychobiological indicators of health, as well as decreases in the severity  
25 of depression features.

## 40 Objectives

41  
42 The proposed study aims to evaluate whether a CBCT<sup>®</sup> intervention for couples (CBCT<sup>®</sup>-fC),  
43 with the female partner suffering from depression, can:

- 44 1. reduce depressive symptoms in the female partner,
- 45 2. improve social cognition processes and interpersonal skills of the female partner, and
- 46 3. reduce stress reactivity (measured as cortisol, sAA, and markers of inflammation) to  
47 social interactions in both partners that is associated with alterations in methylation  
48 patterns of SLC6A4 and OXTR.

49  
50 We expect the improvement of couples participating in CBCT<sup>®</sup>-fC to be superior compared to  
51 those receiving treatment as usual (TAU).

## Method

### Study design

This study will be conducted in a prospective, parallel randomized controlled design, comparing CBCT<sup>®</sup>-fC with a TAU control condition. Changes in outcome measures from baseline (T1 at week 8-10 after recruitment start); to post-intervention assessment (T2 week 20-21 after recruitment start); to follow up 4-week post Intervention (FU1 week 24-25) and to 12-week follow up post intervention (FU2 week 33-34) will be compared between the two study arms (Figure 1). Data assessment and interventions will be carried out at the Institute of Medical Psychology (IMP), Center for Psychosocial Medicine, University Hospital Heidelberg, Germany. The IMP will provide the laboratory infrastructure for biomarker analysis (freezer space, centrifuge) and therapy rooms equipped with audio and video devices for presentations / exercises and assuring intervention adherence.

<insert Fig. 1>

### Recruitment

We will use the following sources to recruit participants: Newspaper advertising, posters and flyers in public places, advertising in public transport, advertising in social media, and university mailing lists. We will additionally contact registered doctors, psychiatric and psychosomatic clinics, as well as outpatient centers for counseling and psychotherapy. The enrollment of the first depressed couple has started on March 28th, 2017.

### Participants

The study described here focuses primarily on females due to several reasons: Current prevalence rates of major depression indicate that females are affected twice as often as men; there also seem to be some differences in the phenomenological symptomatology. Additionally, as the study focuses on psychobiological markers and as there are hormonal differences in women and men, and for financial and infrastructural (feasibility) reasons, we had to keep the sample size manageable.

1  
2  
3 Female patients are included if they 1) are at least 20 years old, 2) have a romantic  
4 relationship for at least 2 years, and 3) are diagnosed with a primary recurrent depressive  
5 disorder (ICD-10: F33.0 or F33.1) by the Structured Clinical Interview (SCID) of the Diagnostic  
6 and Statistical Manual of Mental Disorders (DSM-V)[73] in combination with the observer-  
7 based Hamilton Depression Rating Scale (HDRS  $\geq$  12; within the range of a mild  
8 depression)[74] and the Beck Depression Inventory (BDI-II  $\geq$  16; within the range of mild  
9 depression) self-rating.<sup>1</sup>[75, 76] General exclusion criteria for the female patients are: 1)  
10 other severe mental disorders (such as psychotic symptoms; bipolar disorders, acute suicidal  
11 tendency), 2) altered physical condition (pregnancy, chronic or severe metabolic,  
12 endocrinological, neurological, nephrological, cardiac or hepatic conditions), 3) heavy  
13 smoking ( $\geq$  20 cigarettes/ day), substance abuse or acute addiction, 4) enrolling in  
14 psychological therapies (couple therapy; individual psychotherapy – except for probatory  
15 phase including a maximum of the first six sessions), and 5) current participation in a  
16 mindfulness- or compassion-based group training.

17  
18 Male partners are included if they 1) are at least 20 years of age, 2) have a romantic  
19 relationship for at least 2 years (with the targeted depressed female partner), and 3) are not  
20 diagnosed with a primary recurrent depressive disorder (ICD-10: F33.0 or F33.1) by the  
21 Structured Clinical Interview (SCID) of the Diagnostic and Statistical Manual of Mental  
22 Disorders (DSM-V).[73] General exclusion criteria for the male patients are primarily with  
23 regard to acute mental disorders at baseline not life span: 1) other severe mental disorders  
24 (such as psychotic symptoms; bipolar disorders, acute suicidal tendency), 2) altered physical  
25 condition (chronic or severe metabolic, endocrinological, neurological, nephrological, cardiac  
26 or hepatic conditions), 3) heavy smoking ( $\geq$  20 cigarettes/ day), substance abuse or acute  
27 addiction, 4) enrolling in couple therapy; and 5) current participation in a mindfulness- or  
28 compassion-based group training.

---

29  
30  
31  
32  
33  
34  
35  
36  
37  
38  
39  
40  
41  
42  
43  
44  
45  
46  
47  
48  
49  
50  
51  
52  
53  
54  
55  
56  
57  
58  
59  
60  
<sup>1</sup> The cut off scores for the HDRS German version are defined as follows:  $\leq$  8 = normal/remitted; 9-16 = mild; 17-24 = moderate;  $\geq$ 25 severe depression and for the BDI-II German version:  $\leq$  13 = normal/remitted; 13-19 = mild; 20-28 = moderate;  $\geq$ 29 severe depression. These cut off scores are defined by the S3-guidelines of the Working Group of the Scientific Medical Societies of Germany.[76]

## Patient and public involvement

Overall, the patients are not involved neither in the design nor in recruitment or conduction of the study. In a piloting phase we tested all the materials, questionnaires and laboratory assessments. Due to the participants' experience and feedback, we reduced the quantity of questionnaires, changed the procedure of the surveys and laboratory/psychobiological assessments in order to significantly reduce the effort and expense. With regard to the RCT design, we ask each participant to evaluate study-related measures, design and the intervention itself. All participants will receive the published articles with the final results of the study, and a short summary of the major findings will be provided in an email.

## Procedures

### ***Baseline assessment (T1)***

After confirming eligibility of both members of a couple in initial and separate telephone screenings, couples will be invited to two consecutive laboratory days. On ***lab day 1***, we will inform the participants about the study goals and procedures, and ask them to complete the informed consent form. Participants will then be interviewed to complete the SCID and HDRS observer rating to assess for the presence of mental (particularly depressive) disorders. While one partner is interviewed, the other will be asked to fill out a series of questionnaires including the BDI-II and several scales on relationship quality, empathy, and symptom burden (see Table 1). Afterwards, a medical assistant will take blood samples from both partners of approximately 25 ml each, using EDTA Vacutainers and PAXgene Blood RNA Tubes, allowing for the analysis of immune and epigenetic parameters. The genes SLC6A4 and OXTR will be analyzed for methylation of CpG-sites and their promoter-regions, referring to polymorphisms and mRNA-expression. Blood samples will be stored in the IMP's biochemical laboratory and will then be transferred to the Central Institute of Mental Health in Mannheim, Germany, and to the Central Laboratory at Heidelberg University, for further analyses. After blood sampling, each individual will be fitted with a one-lead ambulatory electrocardiogram (ECG) monitor (eMotion FAROS 180°) for 24h recording. Participants will also be instructed in the handling of the device.

***Lab day 2*** will take part in our eye-tracking laboratory (IMP Heidelberg), where participating couples will be comfortably seated facing each other, with a table in between serving as the eye-tracking platform. The first saliva sample will be taken after welcoming the participants.

1  
2  
3 We will then calibrate the eye-tracking system. A scene camera will be placed next to the  
4 women's head/eyes to capture her gaze perspective (i.e. the view on her partner). The  
5 arrangement of all eye-tracking and related equipment is pictured in the Appendix 1. Gaze  
6 direction and fixations points will be recorded with a TOBII XT 60 remote eye-tracking device  
7 at 60Hz, and mapped to the picture captured by the scene camera. Regions of interest are  
8 segmented into: partner's eyes, mouth, rest of the face, and off-face area.

9  
10 We will then provide participants with instructions for the PSI: First, each person will receive  
11 a list of 27 standardized conversation topics, and will be asked to choose topics they wish to  
12 discuss, in whatever order is fitting for a particular couple. Topics were adopted from the  
13 Problem List (PL) used in research on relationship conflict[77], but modified so that the  
14 conversational focus is on positive, instead of negative, issues (e.g. trust, financial security,  
15 and affection). Couples will be verbally instructed to exclusively talk about positive content,  
16 to be supportive, to express compliments towards each other. As soon as couples "fall of  
17 track" of the discussion they will be asked to continue with another topic. Conversations will  
18 be videotaped and checked for protocol adherence. The experimenter will then leave the  
19 room, and participants will perform the PSI for a duration of 10 minutes. Before and after  
20 the PSI, the second and third saliva samples will be taken and couples will fill out a 9-item  
21 self-constructed scale on acute mood. During the PSI, eye-tracking data of the female  
22 partner will be continuously recorded. We will collect the fourth saliva sample 20 minutes  
23 after the PSI. During the waiting time and until discharge, participants will be asked to  
24 complete a second set of questionnaires and to return the ECG devices. Procedures and  
25 assessments are summarized in Figure 2. A participant flow chart can be found in Figure 3.

26  
27 For all salivary samples, we will utilize SaliCab tubes (RE69985 IBL International GmbH  
28 Hamburg, Germany) with the passive drool method. After collection the samples will be  
29 immediately stored at -80°C. Cortisol and  $\alpha$ -amylase will be batch assayed later at the in-  
30 house laboratory of the IMP.

31  
32  
33  
34  
35  
36  
37  
38  
39  
40  
41  
42  
43  
44  
45  
46  
47  
48  
49 <insert Fig.2>

### 50 51 52 53 ***Post-intervention assessment (T2)***

54 After the baseline assessment (T1) is completed, couples will be invited to participate in the  
55 training program or to continue their routine care plan for a duration of 10 weeks. After the  
56  
57

1  
2  
3 interventional period (description see below) is completed, participants will undergo all  
4 assessments described above except for the SCID interview at T2.  
5  
6  
7

### 8 ***Follow-up assessments (FU1 & FU2)***

9  
10 Two follow-up assessments (FU1 & FU2) will be conducted in both the CBCT<sup>®</sup>-fC and TAU  
11 control group. Four and twelve weeks after completion of the training (FU1: week 24-25  
12 FU2: 33-34), the questionnaires administered at baseline will be distributed to participants  
13 online (see Table 1). In case participants are loss to follow-up, participants will be contacted  
14 and asked to state reasons they discontinued participation in order to be able analyze  
15 reasons for dropping out, and appropriate interpretation of data (including missing data).  
16  
17  
18  
19  
20

### 21 ***Blinding and randomization***

22  
23 A portion of the study personnel will be blinded about allocation of couples to either  
24 treatment group (treatment CBCT<sup>®</sup>-fC or TAU), including the medical staff conducting the  
25 blood draw, all wet lab personnel, and all research assistants performing the eye tracking  
26 assessment. All participants will be informed about the general aims of the study. However,  
27 participants will not be informed about the operationalizations of behavioral and biological  
28 measures.  
29  
30  
31  
32

33  
34 Couples will be block-randomized to either CBCT<sup>®</sup>-fC or control group using a computerized  
35 random-number generator ([www.random.org](http://www.random.org)). Blocks for each study cohort (consisting of at  
36 least 8 couples) will be randomized after recruitment and baseline assessments are  
37 completed. This randomization procedure will be repeated until the planned number of  
38 participating couples is reached. A postdoctoral researcher of the IMP, who is otherwise not  
39 involved in the proposed study, will conduct all randomization for the study. Figure 3 depicts  
40 the CONSORT flow chart[78] of the present study.  
41  
42  
43  
44  
45

46  
47 <insert Fig.3>  
48  
49

### 50 ***Interventions***

51  
52 All participants (including those randomized to CBCT<sup>®</sup>-fC) will receive the standard  
53 treatment (TAU) for depression. All treatments, including prescriptions, will be monitored  
54  
55  
56  
57  
58  
59

1  
2  
3 for both groups. At a minimum this monitoring will include general practitioner care and  
4 contact with community mental health providers.  
5  
6  
7

### 8 **CBCT®-fC – Cognitively-Based Compassion Training for Couples**

9  
10 CBCT® is a secular approach and was established as a structured protocol consisting of an  
11 either 6-, 8- or 10-week training program with a 1.5 to 2-hour group session weekly and daily  
12 home practice based on pre-recorded guided meditations of 7 to 20 minutes for at least  
13 three days a week.[61] In this study, we will implement a 10-week training program with 2-  
14 hour weekly sessions, including class teachings explaining and discussing the rationale of the  
15 content of each of the 6 modules, group discussions and individual and dyadic guided  
16 contemplative practices. The text of the audio-based daily home practice is standardized,  
17 and for the purpose of this study translated and audio-recorded into German by the same  
18 certified instructor who will also lead the CBCT®-fC groups (CAR).  
19

20  
21 The trainer (CAR) is a certified couple and a family therapist and is in an advanced stage of  
22 individual psychotherapy training. She is currently conducting individual psychotherapy  
23 under supervision and has already acquired clinical experience with the treatment of  
24 psychiatric and psychosomatic disorders. She is also fulfilling several training requirements,  
25 such as long-term practice of mindfulness- and compassion based meditation, under  
26 guidance of recognized supervisors and meditation teachers (LTN and others). She has also  
27 attended the CBCT® Teacher certification program at Emory University (Atlanta, USA).  
28

29  
30 For CBCT®, all human beings are considered to be endowed with a biologically-based  
31 compassion that is focused on those close to us. But as research has shown, compassion as  
32 an inner quality or skill can be trained based on the enlargement of feelings of endearment  
33 towards others and comes along with a variety of health benefits.[79] The change process  
34 described here is rooted in Tibetan-Buddhist understanding - as the training itself is based on  
35 the so called *lo-jong* tradition, which means “mind training” and is taught to cultivate  
36 compassion towards others not only close to us.  
37

38  
39 The model of how the intervention works is that change takes place in three steps: (1)  
40 starting at changing views by getting to know and to familiarize new perspectives receiving  
41 information, (2) based on that changing behavior through conviction that comes about  
42 through critical and reflective thinking, and then (3) embodied understanding takes place  
43 through thorough and repetitive, contemplative practice.  
44  
45  
46  
47  
48  
49  
50  
51  
52  
53  
54  
55  
56  
57  
58  
59  
60



1  
2  
3 During the training process, several prerequisites and primary conditions are introduced in a  
4 stepwise manner, ultimately leading to compassion. CBCT® focuses on 6 essential key parts  
5 for the development of compassion: (1) developing attentional stability and clarity of the  
6 mind (focused attention and meditative concentration), (2) cultivating insight into the nature  
7 of mental experience (mindfulness with the focus to train non-judgment and non-reactivity  
8 with regard to the unfolding moment-to-moment experiences), (3) cultivating self-  
9 compassion – recognizing and understanding biased cognitions and reactions and enhancing  
10 self-efficacy, (4) developing impartiality by reflecting similarities with others such as the urge  
11 for well-being and happiness overcoming fixed categorizations of others into friends,  
12 enemies and strangers, (5) developing appreciation and affection for others by  
13 acknowledging our interdependent and interconnected nature, and finally (6) developing  
14 empathy and realizing engaged compassion – as an aspirational motivation and a readiness  
15 to altruistically act if possible and if needed. [62] The intervention starts with an overview  
16 and basic instructions within the first session and end with a repetition, summary and take-  
17 home ideas for continuing practice during the last session. The first and the third module will  
18 be repeated once – resulting in a total of 10 sessions.

19  
20 The main purpose of the program is to develop compassion for oneself and others, as well as  
21 to increase compassionate responses and behaviors – particularly in the context of  
22 relationships.

23  
24 For enhancement of positive reciprocity between romantic partners, several exercises and  
25 home-based practices will be introduced that are based on couple communication  
26 training,[80-84] and on the protocol of the mindfulness-based relationship  
27 enhancement[85]: a) building mindful ability to talk, b) building mindful ability to listen  
28 (without reacting initially), c) appreciation in action – indulging the partner, and d) “noticing,  
29 how the partner is doing something good for me” – gratefulness in action verbally/non-  
30 verbally. A dyadic empathy exercise will also been added, with regard to the manual of the  
31 “Cognitive Behavioral Analysis System of Psychotherapy” for chronic major depression.[56,  
32 86] Finally, the compassion meditation has been formalized as a dyadic exercise in addition  
33 to individual meditation.[87]

### 34 35 **Possible adverse events**

1  
2  
3 The intervention will be conducted with patients who are suffering from recurrent  
4 depressive disorder and their partners. We expect that partner may show some degree of  
5 burden and individual distress. Risks or side effects of the intervention and psychometric  
6 assessment for couples are not known. The training can trigger negative emotional states. If  
7 negative states arise, they will be addressed in the group sessions, or in supplemental  
8 individual or couple therapy sessions (maximum of three additional sessions).  
9

10  
11  
12  
13 The collection of a blood sample is usually associated with a very low risk. Slight pain may  
14 occur at the injection site or a bruise (blue spot) may appear which can be visible for a few  
15 days. In extremely rare cases, the formation of a blood clot (thrombosis), localized  
16 inflammation or infection at the injection site may also arise, or permanent damage to blood  
17 vessels or nerves may happen. During the blood draws, the study physician is also present to  
18 identify any complications and side effects that may occur.  
19  
20  
21  
22

### 23 24 25 ***Treatment as usual (TAU)***

26  
27 Couples assigned to the TAU group will start (or continue) with TAU which will consist of  
28 receiving medical treatment and primary health care, or waiting for starting individual  
29 therapy (average waiting time 3 months.[88] They will be asked to maintain their treatment  
30 plan during the study period of 10 weeks. Patients who start participating in regular  
31 psychotherapy treatment during the study period will be excluded from the analysis. All  
32 participants in the TAU group will be offered to participate in a CBCT®-fC after the end of  
33 study (i.e. after the second follow-up).  
34  
35  
36  
37  
38  
39  
40

### 41 ***Adherence***

42  
43 Couples' compliance with the CBCT®-fC meditations and exercises will be assessed with pen  
44 and paper questionnaires after each weekly in-house session using Therapeutic Presence  
45 Inventory[89] (TPI, modified for the study), Practice Quality[90](PQ-M, adapted version of  
46 the Practice Quality-Mindfulness) and the Scale for the Multiperspective Assessment of  
47 General Change Mechanisms in Psychotherapy (SACiP).[91] The CBCT®-fC group will receive  
48 one text message four times weekly during the ten-week period. This message will serve as a  
49 reminder for the meditation practice and home-based exercises, and will also capture which  
50 meditations or practices participants completed, and how long they practiced. Participants  
51  
52  
53  
54  
55  
56  
57  
58  
59  
60

1  
2  
3 will be asked to indicate reasons for non-performance. Participants' emotional status will  
4 also be assessed via the Positive and Negative Affect Schedule (PANAS).[92]

5  
6 The TAU control group will receive one text message per week during the same time period  
7 asking to indicate their emotional status.  
8  
9

### 10 11 **Primary outcome**

12  
13 The primary outcome for the study is the reduction of depressive symptoms from baseline  
14 to post-intervention, which will be measured with the HDRS observer-based rating  
15 instrument. The HDRS is a standardized rating scale that contains 21 items, scoring on 2- to  
16 5-point scales, and will be administered twice throughout the study: at baseline and post-  
17 intervention.  
18

19  
20 Psychometric properties are adequate with the internal consistency varying from 0.73 to  
21 0.91.[93]  
22  
23  
24  
25

### 26 27 **Secondary outcomes**

#### 28 ***Self-rated depressive symptoms***

29  
30 In addition to the 21-item HDRS observer-based rating we will also monitor changes in self-  
31 rated depression via the BDI-II at four measurement times (baseline, post-intervention,  
32 follow-up I and II). The BDI-II is a standardized questionnaire comprising 21 items, with  
33 scoring on a 0-3 scale. The internal consistency varies from 0.89 to 0.93 and the retest  
34 reliability ranged from 0.80 to 0.82.[94]  
35  
36  
37  
38  
39  
40

#### 41 ***Eye tracking during the Positive Social Interaction Paradigm (PSI)***

42 During the interaction task (PSI), the female partner's eye movements will be monitored  
43 with a remote eye tracker (Tobii X2-60, sampling rate 60Hz) at T1 and T2. Total gaze duration  
44 in milliseconds will be assessed via real-time eye-tracking during a standardized PSI with the  
45 romantic partner. Raw coordinates of gaze and fixation will be mapped to the following  
46 predefined areas of interest: 1. eyes, 2. mouth, 3. other regions of the face, and 4. off face  
47 and the areas of interest will be compared between depressed and controls as well as within  
48 depressed couples. In this study, we interpret eye-tracking data as a more objective proxy  
49 measure for social cognition processes with regard to emotion-related information  
50 processing biases. We expect that randomization to CBCT®-fC will result in increased  
51  
52  
53  
54  
55  
56  
57  
58  
59  
60

1  
2  
3 maintenance of gaze towards the partner's face during the instructed interaction, and thus,  
4 in a reduction of the social information processing biases accompanying the disorder.  
5  
6  
7

### 8 ***Cortisol & $\alpha$ -Amylase***

9  
10 Cortisol and  $\alpha$ -Amylase will be collected as stress-sensitive biomarkers in sampling tubes for  
11 collection of saliva samples (RE69985 IBL International GmbH Hamburg, Germany) at four  
12 time-points (-20min, pre-post, +20min relative to PSI) at T1 and T2. The samples will be  
13 stored at -80°C and analyzed in the in-house laboratory of the IMP, Heidelberg, Germany.  
14 This data will be analyzed using area under the curve (AUC) approach[95], comparing  
15 changes over time between the two study arms. We expect participants in the experimental  
16 group to experience a reduction in HPA- and SAM-axis reactivity during the PSI after the  
17 intervention.  
18  
19  
20  
21  
22  
23  
24

### 25 ***IL-1 $\beta$ & IL6***

26  
27 IL-1 $\beta$  and IL-6 will be measured in blood samples on lab day 1 at T1 and T2. The samples will  
28 be stored at -80°C at the in-house lab, and will then be sent to the Central Laboratory at  
29 Heidelberg University, where they will be processed by standard means (i.e. high-sensitivity  
30 enzyme-linked immunosorbent assay). We expect CBCT<sup>®</sup>-fC to result in a reduction of the  
31 concentration level of both of the two pro-inflammatory cytokines in both members of a  
32 couple.  
33  
34  
35  
36  
37  
38

### 39 ***Autonomic function (ECG)***

40  
41 An ECG will be assessed with a one-lead ambulatory monitor (eMotion FAROS 180° Mega  
42 Electronics Ltd. Kuopio Finland) sampling at 1000Hz for 24-hour recording at T1 and T2. Each  
43 individual will receive the monitor for 24h (attached with a chest belt) prior to the PSI, and  
44 until the end of the PSI assessment on the second day. Participants will be instructed in the  
45 handling of the device. The 24h ECG recording will be segmented in 5 minutes intervals as  
46 recommended by the Task Force Guidelines for HRV assessment.[96] Beat-to-beat variation  
47 in the heart rate is mainly controlled by the ANS and permits determination of the relative  
48 contributions of sympathetic and parasympathetic activity underlying autonomic control of  
49 the heart. Here, rapid fluctuations in HR are due to vagal activity, while slower HR changes  
50 are a result of mixed influence of sympathetic (non-vagal) and parasympathetic activity. The  
51  
52  
53  
54  
55  
56  
57  
58  
59  
60

1  
2  
3 following parameters will be derived for each segment using the software package  
4 “RHRV”:[97] 1. Root mean square of successive differences (RMSSD), 2. successive normal-  
5 to-normal (NN) intervals that differ by more than 50msec (NN50), 3. the proportion of NN50  
6 divided by total number of NNs (PNN50) indexing the rapid changes in HR and therefore  
7 vagal activity, and 4. the standard deviation of NN intervals (SDNN) with a resulting RR time  
8 series indexing mixed sympathetic and parasympathetic activity. ECG recordings will  
9 continue during the PSI, enabling us to analyze ANS reactivity to the interaction paradigm.

10  
11 We expect a stronger parasympathetic response to PSI after participation in CBCT®-fC.

12  
13 In an exploratory analysis, a two-stage approach will be used to estimate circadian variation  
14 parameters of cardiac autonomic function over a 24h period. Set in 2009 by the Research  
15 Domain Criteria initiative (RDoC) from the National Institute of Mental Health, a primary goal  
16 is to develop a classification system for mental health disorders, linking dimensions of  
17 psychopathology to neurobiological systems, including alterations in circadian rhythms.[98]  
18 For the current study, a candidate system that might match these criteria is the central  
19 autonomic network (CAN). The CAN is widely involved in socio-emotional regulatory  
20 processes.[99, 100] This network includes cortical components such as the medial, the  
21 prefrontal, the anterior cingulate, and the insular cortex as well as several nuclei such as the  
22 paraventricular nucleus and the amygdala. The network is linked to the peripheral nervous  
23 system via the vagus nerve. In responses to emotional significant stimuli, autonomic output  
24 is modulated via the anterior cingulated cortex and its projections to the prefrontal cortex,  
25 amygdala, hypothalamus and brainstem.[101, 102] Signals are transferred via the stellate  
26 ganglia and the vagus nerve to the sinoatrial node of the heart and modulates the heart rate.  
27 Therefore, activity in the neural structures involved in affective and autonomic regulation  
28 can be indexed noninvasively by measures of peripheral cardiac autonomic modulations, i.e.  
29 vmHRV.[103-105]

30  
31 Trigonometric regression models with ordinary least square estimations will be applied to  
32 each 24h period of 5 minute segments, to estimate three individual level cosine function  
33 parameters, to capture individual circadian variation patterns in the time series of the  
34 following RMSSD segments: 1. MESOR (Midline Estimating Statistic Of Rhythm) defined as  
35 the rhythm adjusted 24h mean fitted to the data, 2. amplitude, defined as the distance  
36 between MESOR and the maximum of the cosine curve (i.e. half the extent of rhythmic  
37 change in a cycle), and 3) acrophase, defined as the phase shift of amplitude from a given  
38  
39  
40  
41  
42  
43  
44  
45  
46  
47  
48  
49  
50  
51  
52  
53  
54  
55  
56  
57  
58  
59  
60

1  
2  
3 reference time point when the highest oscillation is reached (i.e. time lag).[106] This is  
4 assumed to be 24-hour period after visual inspection.[for a more detailed explanation of  
5 underlying mathematics see 107] In a second step, these individual cosine function  
6 parameters will be forwarded as dependent variables to multivariate multiple regression  
7 models for simultaneous effect estimation of CBCT®-fC on the circadian recovery profile of  
8 vagal activity. We will reduce alpha error by using a single regression model with  
9 simultaneous estimation of more than one outcome variable. We expect an increase in  
10 MESOR and Amplitude post training.  
11  
12  
13  
14  
15  
16  
17

### 18 ***Epigenetics - SLC6A4 and OXTR***

19  
20 The serotonin transporter gene SLC6A4 and the oxytocin receptor gene (OXTR) will be  
21 measured in blood samples on lab day 1 at T1 and T2. The PAXgene Blood RNA tubes are  
22 incubated at room temperature so that stabilizers in the tubes can become effective. The  
23 samples will be stored at -80°C at the in-house lab and will then be sent to a certified  
24 laboratory, where they will be processed by standard means. We expect CBCT®-fC to result  
25 in an alteration of the methylation pattern of both of the genes, focusing on specific CpG-  
26 sites in their promoter-regions.  
27  
28  
29  
30  
31  
32  
33

### 34 **Statistical analysis and missing data**

35 All outcome data incorporating repeated observations (nested within individuals) will be  
36 analyzed within 2-level hierarchical linear modeling. Repeated measures of the outcomes  
37 (e.g. 4 observations for the primary outcome, BDI-II) will be modeled as level-1 variables.  
38 Group assignment (CBCT®-fC vs. TAU) will be regarded as a level-2 predictor (individual  
39 level), and the cross-level interaction will be tested for significant influence on the individual  
40 trajectories. Dependent variables that are measured simultaneously for both patients and  
41 their partner (e.g. stress measures) will be analyzed to determine dependencies within a  
42 couple e.g. by treating the dyad as a third hierarchy level. Type-I error probability will be set  
43 at  $\alpha = .05$  for all tests. Data based on an intention-to-treat approach will be compared to a  
44 completers-only dataset in the course of sensitivity analyses. Several strategies will be used  
45 to minimize the likelihood of missing data. We will clearly explain to couples what their  
46 efforts will be for the study before they agree to participate. We will also support couples by  
47 proactively manage their appointments of the pre-post assessments and other study  
48  
49  
50  
51  
52  
53  
54  
55  
56  
57  
58  
59  
60

1  
2  
3 requirements by sending reminder emails, texts, and by making reminder phone calls.  
4 Training sessions will be offered in the evenings with a flexible start (between groups), to  
5 meet the needs of each training group. Completeness of questionnaire data will be closely  
6 monitored to avoid missing questionnaires. Participants will fill in their questionnaires at the  
7 IMP using a tablet PC. Study personnel will be available in the event of any questions or  
8 technical issues. Biomarker sampling will be monitored using standardized checklists, and we  
9 will note missing specimens as well as the reasons for their not being available.  
10

11  
12 Patient drop-outs from the training will be closely monitored and reasons for leaving the  
13 study before the end of the protocol will be assessed to distinguish study-related reasons for  
14 attrition compared to other reasons, and to improve study procedures.  
15  
16  
17  
18  
19  
20

### 21 **Sample size**

22 Power calculations were adapted for repeated-measures analysis of variance (ANOVA)  
23 enabling us to calculate the required sample size with G\*Power.[108] As multilevel modeling  
24 offers enhanced statistical power over a common ANOVA approach, the sample size  
25 calculated represents a conservative estimate. Power calculations are based on findings  
26 from[109] The authors investigated the effects of a mindfulness-based cognitive therapy for  
27 depressed patients within a large-scale RCT and found a medium sized effect of  $d = 0.53$   
28 standard deviations compared to a TAU condition on the HDRS (i.e. the primary outcome of  
29 our study). Assuming a similar medium-sized effect ( $f = .25$ ) when comparing CBCT®-fC to  
30 TAU from pre-to-post intervention, power analysis with G\*Power suggests a required sample  
31 size of  $N = 40$  ( $(1-\beta) = .80, \rho = .40$ ). To accounting for a ~20% drop-out, we plan to randomize  
32  $N = 50$  couples into the study.  
33  
34  
35  
36  
37  
38  
39  
40  
41  
42  
43

### 44 **Data monitoring**

45 All training sessions will be videotaped and a selection will be reviewed by senior  
46 researchers. All PSI sessions will be videotaped and reviewed to ensure couples compliance  
47 to the PSI protocol. The laboratory sessions will be documented on checklists and reviewed  
48 by the senior staff. An experienced statistician will review all statistical analyses.  
49  
50  
51  
52  
53

### 54 **Discussion**

1  
2  
3 The SIDE study is the first investigation to examine multilevel effects of a compassion-based  
4 training program for couples with the female partner suffering from depression. The  
5 assessment protocol will allow for a comprehensive evaluation of naturalistic real-time  
6 interaction of romantic partners, and for an integrative analysis of underlying biomarker  
7 change. In combination with self-report assessments and observer-based standard scales,  
8 our approach will enable us to advance the knowledge of the bio-psycho-social processes  
9 involved in etiology, progression and treatment of depressive disorders.[110]  
10  
11

12  
13  
14 Recent data suggests that depressed patients benefit less from the stress-reducing effects of  
15 positive social interactions and high-quality relationships than healthy individuals, both in a  
16 psychological and a biological way. Among others, social cognition processes and several  
17 markers of stress-physiology and immune-responses such as cortisol, alpha-amylase,  
18 cytokine IL-6, and IL-1 $\beta$ , and vmHRV as well as epigenetic marks (SLC6A4 and OXTR) might be  
19 altered while couples are instructed to positively interact with each other. Whether  
20 depressed female patients also display less active positive behavior and an altered  
21 psychobiological response in real-time interaction remains to be examined.  
22  
23

24  
25 With the SIDE study, we intend to address four innovative aspects of effectiveness research.  
26 First, the SIDE study will complement earlier preliminary evidence on the effects of CBCT<sup>®</sup> on  
27 clinical improvements,[67, 111-114] by addressing research gaps concerning the associations  
28 between compassion and depression. Second, and related to first point, specific aspects of  
29 the group intervention for enhancement of mindfulness and compassion on psychobiological  
30 concomitants will be elucidated. Third, the results will provide additional therapeutic tools  
31 to target a powerful mediator of health – the social relationship. Fourth, the male partner  
32 will be included in the group-based training taking into account his burden and addressing  
33 his needs, and thereby increase the chance for a better integration of interactional  
34 (ex)changes in daily routine.  
35  
36  
37  
38  
39  
40  
41  
42  
43  
44  
45  
46

#### 47 **Possible limitations**

48  
49 Although comparison with the TAU control group impedes the drawing of conclusions about  
50 the specificity of CBCT<sup>®</sup>-fC over and above non-specific therapeutic factors, differences in  
51 measures of the extend of individuals' engagement in home practice (i.e. time) may give  
52 some indications in that regard. Importantly, the training is thought to complement rather  
53 than to replace individual therapy. Therefore, we are particularly interested if the TAU plus  
54  
55  
56  
57  
58  
59  
60



1  
2  
3 CBCT<sup>®</sup>-fC group improves with regard to the treatment outcomes via increased social  
4 functioning and reduced depressive and distress symptoms. In addition, both groups will  
5 have comparable TAU conditions and thus benefit from non-specific therapeutic factors,  
6 such as the therapeutic relationship and peer support. Furthermore, we will investigate the  
7 degree of active involvement with regard to the mindfulness and compassion meditations  
8 and dyadic exercises – both in-sessions and at home practice; allegiance will be controlled  
9 for potential bias effects.  
10  
11  
12  
13  
14  
15

16 **Ethics and Dissemination:** Participants will be informed according to the Declaration of  
17 Helsinki. Medical staff will adhere to the professional code of conduct for doctors in Baden-  
18 Württemberg, Germany. Study participation is completely voluntary. Detailed written and  
19 oral information on study aims, procedure, benefits and risks will be provided (see Appendix  
20 2-5). After written informed consent, eligible participants will be enrolled. Full participation  
21 in the study assessments will be financially compensated. The IMP will fully cover costs for  
22 the CBCT<sup>®</sup>-fC. Ethical approval has been obtained from the ethics committee of the Medical  
23 School Heidelberg, Heidelberg University, Germany (S-021/2016). In case any changes have  
24 to be made with regard to the study protocol, these will be communicated with the ethics  
25 committee. Results will be presented in international, peer-reviewed journals and on  
26 conferences in the field of clinical psychology and psychiatry.  
27  
28  
29  
30  
31  
32  
33  
34  
35  
36

### 37 **Availability of data and material**

38 Research data will be made available for future research by other researchers anonymously  
39 via the Competence Centre for Research Data (Heidelberg University) using the platform  
40 heiDATA (the university's research data repository) in line with its Research Data Policy  
41 adopted by Heidelberg University: <http://www.data.uni-heidelberg.de/services.html>.  
42 Confidential information of all participants is subject to data protection. Data will only be  
43 passed on to third parties in a de-identified format (i.e. all protected health information  
44 removed).  
45  
46  
47  
48  
49  
50  
51

### 52 **Competing interests**

53 The authors declare that they have neither competing interests nor conflict of interest.  
54  
55  
56  
57  
58  
59  
60

### **Funding**

The study is mainly funded by the Institute of Medical Psychology, University Hospital Heidelberg, and partly by the Mind and Life Organization as well as by the Deutsche Gesellschaft für Systemische Therapie, Beratung und Familientherapie. Further funding is pending.

### **Author's contributions**

CAR and MNJ drafted the first version of the manuscript sharing the first authorship as they contributed equally. MT and JB supported this process. BD, TN, TH and TWWP delivered feedback on a first version of the paper – TN and TH focusing especially on the CBCT®-fC part. CAR, MNJ, MW and TWWP critically revised the second version of the manuscript for important intellectual content with regard to psychobiological assessments, and additionally TWWP did the English copyediting. While revising the manuscript, MS was engaged specifically with rewriting the parts on epigenetics. CAR, MNJ and BD contributed to the design of the study. All authors have approved the final version of the manuscript.

### **Acknowledgments**

We would like to acknowledge the Mind and Life Institute providing financial support in part for the preparation phase in form of the Francisco J. Varela Award, which Dr. Aguilar-Raab received in order to modify and extend the CBCT® protocol to suit couples in close collaboration with experts in the field. Furthermore, we thank the Institute for Medical Psychology, University Hospital Heidelberg and staff members for providing financial and infrastructural support. Marc N. Jarczok and Marco Warth are supported by the Physician-Scientist-Program of the Medical Faculty at Heidelberg University. We also would like to acknowledge financial support by Deutsche Forschungsgemeinschaft and Ruprecht-Karls-Universität Heidelberg within the funding programme Open Access Publishing.

**Table 1** Overview of measures

| Short Name                               | Full Name                                                                    | Pre-Treatment (CBCT®-fC vs. TAU) | Post-Treatment (CBCT®-fC vs. TAU) | Comments                                                            |
|------------------------------------------|------------------------------------------------------------------------------|----------------------------------|-----------------------------------|---------------------------------------------------------------------|
| <b>Primary outcomes</b>                  |                                                                              |                                  |                                   |                                                                     |
| HDRS                                     | Hamilton Depression Rating Scale[74]                                         | <                                | X                                 |                                                                     |
| BDI-II                                   | Beck Depression Inventory[75]                                                | X                                | X                                 |                                                                     |
| <b>Secondary outcomes</b>                |                                                                              |                                  |                                   |                                                                     |
| BSSS                                     | Berliner Social Support Scales[115]                                          | X                                | X                                 |                                                                     |
| CLS                                      | Compassionate Love Scale[116]                                                | X                                | X                                 |                                                                     |
| EQ                                       | Empathy Quotient                                                             | X                                | X                                 |                                                                     |
| EVOS                                     | Evaluation of Social Systems Scale[117, 118]                                 | X                                | X                                 |                                                                     |
| UCLA-LS                                  | UCLA-Loneliness-Scale[119] (German version: Hamburger Einsamkeitsskala[120]) | X                                | X                                 |                                                                     |
| KIMS                                     | Kentucky Inventory of Mindfulness Skills[121, 122]                           | X                                | X                                 |                                                                     |
| PBD                                      | Partner Burden in Depression (constructed in relation to the PHQ-9)          | X                                | X                                 | For male partners only                                              |
| PFB                                      | Partnership Questionnaire[123]                                               | X                                | X                                 |                                                                     |
| PHQ-9                                    | Patient Health Questionnaire[124, 125]                                       | X                                | X                                 |                                                                     |
| RAS (Item 2)                             | Second Item from the Relationship Assessment Scale[53, 126]                  | X                                | X                                 |                                                                     |
| SCS                                      | Self Compassion Scale[71, 127]                                               | X                                | X                                 |                                                                     |
| TICS                                     | Trier Inventory for chronic Stress[128]                                      | X                                | X                                 |                                                                     |
| <b>Characteristics &amp; Confounders</b> |                                                                              |                                  |                                   |                                                                     |
| CLE                                      | Critical Life Events                                                         | X                                | X                                 |                                                                     |
| CTQ                                      | Childhood Trauma Questionnaire[129]                                          | X                                |                                   |                                                                     |
| IIP                                      | Inventory of Interpersonal Problems[130, 131]                                | X                                |                                   |                                                                     |
| SCID                                     | The Structured Clinical Interview for DSM-IV Axis I Disorders[131, 132]      | X                                |                                   |                                                                     |
| Démographie questionnaire                | e.g.: Nationality, household characteristics, etc.                           | X                                | X                                 | Gynecological questions for women (e.g. pregnancy, menopause, etc.) |
| <b>Checklists</b>                        |                                                                              |                                  |                                   |                                                                     |
| Checklist for blood samples              | e.g: medication in the last 24h, Alcohol, etc.                               | X                                | X                                 |                                                                     |
| Checklist for ECG                        | e.g.: quality of sleep, pain, etc.                                           | X                                | X                                 |                                                                     |
| Checklist for Saliva sample              | e.g: medication in the last 24h, Alcohol, etc.                               | X                                | X                                 |                                                                     |

1  
2  
3 **Figure captions**  
4  
5

6 **Fig. 1** Study Design.

7  
8 PSI = Positive Social Interaction; TAU = Treatment as usual; CBCT<sup>®</sup>-fC = Cognitively-Based  
9 Compassion Training for Couples; T1 = measurement point 1 (baseline); T2 = measurement  
10 point 2 (post intervention); FU1/2 = follow-up 1 and 2  
11  
12  
13

14  
15 **Fig. 2** Assessments.

16 PSI = Positive Social Interaction, ECG = electrocardiogram, CVP = circadian variation pattern,  
17 HRV = heart rate variability, IL = interleukin  
18  
19  
20

21  
22 **Fig. 3** Flow diagram.

23 HDRS = Hamilton Depression Rating Scale, BDI = Beck Depression Inventory, SCID =  
24 Structured Clinical Interview for DSM, ECG = electrocardiogram, PSI = positive social  
25 interaction, CBCT<sup>®</sup>-fC = Cognitively-Based Compassion Training for Couples, TAU =  
26 Treatment as usual, TPI = Therapeutic Presence Inventory, PQ = Practice Quality, SACiP =  
27 Scale for the Multiperspective Assessment of General Change Mechanisms in Psychotherapy  
28  
29  
30  
31  
32  
33  
34  
35  
36  
37  
38  
39  
40  
41  
42  
43  
44  
45  
46  
47  
48  
49  
50  
51  
52  
53  
54  
55  
56  
57  
58  
59  
60

### Abbreviations

AUC: Area under the Curve; BDI-II: Beck Depression Inventory; CAN: Central Autonomic Network; CBCT<sup>®</sup>-fC: CBCT<sup>®</sup> for Couples; CpG: Cytosin-phosphatidyl-Guanin sites; HDRS: Hamilton Depression Rating Scale; HPA: hypothalamic-pituitary-adrenal; NIMH: National Institute of Mental Health; OXTR: oxytocin receptor gene; PANAS: Positive and Negative Affect Schedule; PC: patient couple; PNN50: proportion of NN50 divided by total number of NNS; PQ-M: Practice Quality-Mindfulness; PSI: positive social interaction; RCT: randomized controlled trial; RMSSD: root mean square of successive differences; sAA: saliva alpha-amylase; SACiP: Scale for the Miltiperspective Assessment of General Change Mechanisms in Psychotherapy; SAM: sympatho-adreno-medullary; SCID: Structured Clinical Interview for DSM; SDNN: standard deviation of NN intervals; SLC6A4: serotonin transporter gene; TAU: Treatment As Usual; TPI: Therapeutic Presence Inventory; vmHRV: vagally mediated heart rate variability

## References

1. Kessler RC, Bromet EJ. The epidemiology of depression across cultures. *Annu Rev Public Health* 2013;34:119-38. doi: 10.1146/annurev-publhealth-031912-114409
2. Carney RM, Freedland KE, Veith RC. Depression, the autonomic nervous system, and coronary heart disease. *Psychosom Med* 2005;67 (1):S29-33. doi: 10.1097/01.psy.0000162254.61556.d5
3. Vaillant GE, Mukamal K. Successful aging. *Am J Psychiatry* 2001;158(6):839-47. doi: 10.1176/appi.ajp.158.6.839
4. Beach S, Wamboldt MZ, Kaslow N, et al. Relational processes and DSM-V: Neuroscience, assessment, prevention, and treatment. Arlington, VA: American Psychiatric Association Press 2006.
5. Holt-Lunstad J. Why social relationships are important for physical health: A systems approach to understanding and modifying risk and protection. *Annu Rev Psychol* 2018;69:437-58. doi: 10.1146/annurev-psych-122216-011902 [published Online First: 2017/10/17]
6. Ditzen B, Heinrichs M. Psychobiology of social support: the social dimension of stress buffering. *Restorative neurology and neuroscience* 2014;32(1):149-62. doi: 10.3233/rnn-139008 [published Online First: 2013/04/23]
7. Robles TF, Slatcher RB, Trombello JM, et al. Marital quality and health: A meta-analytic review. *Psychol Bull* 2014;140(1):140-87. doi: 10.1037/a0031859
8. Hirschfeld RM, Montgomery SA, Keller MB, et al. Social functioning in depression: a review. *J Clin Psychiatry* 2000;61(4):268-75.
9. Fink BC, Shapiro AF. Coping mediates the association between marital instability and depression, but not marital satisfaction and depression. *Couple Family Psychol* 2013;2(1):1-13. doi: 10.1037/a0031763
10. Rehman US, Gollan J, Mortimer AR. The marital context of depression: research, limitations, and new directions. *Clin Psychol Rev* 2008;28(2):179-98. doi: 10.1016/j.cpr.2007.04.007
11. Overall NC, Hammond MD. Biased and accurate: depressive symptoms and daily perceptions within intimate relationships. *Pers Soc Psychol Bull* 2013;39(5):636-50. doi: 10.1177/0146167213480188
12. Kupferberg A, Hager OM, Fischbacher U, et al. Testing the social competition hypothesis of depression using a simple economic game. *BJPsych Open* 2016;2(2):163-69. doi: 10.1192/bjpo.bp.115.001362
13. Armstrong T, Olatunji BO. Eye tracking of attention in the affective disorders: a meta-analytic review and synthesis. *Clin Psychol Rev* 2012;32(8):704-23. doi: 10.1016/j.cpr.2012.09.004
14. Joormann J, Gotlib IH. Selective attention to emotional faces following recovery from depression. *J Abnorm Psychol* 2007;116(1):80-5. doi: 10.1037/0021-843X.116.1.80
15. Sears C, Newman K, Ference J, et al. Attention to emotional images in previously depressed individuals: An eye-tracking study. *Cognit Ther Res* 2011;35(6):517-28. doi: 10.1007/s10608-011-9396-5
16. Herbert J. Cortisol and depression: three questions for psychiatry. *Psychol Med* 2013;43(3):449-69. doi: 10.1017/S0033291712000955
17. Burke HM, Davis MC, Otte C, et al. Depression and cortisol responses to psychological stress: a meta-analysis. *Psychoneuroendocrinology* 2005;30(9):846-56. doi: 10.1016/j.psyneuen.2005.02.010
18. Booij SH, Bos EH, Bouwmans ME, et al. Cortisol and alpha-amylase secretion patterns between and within depressed and non-depressed individuals. *PLoS One* 2015;10:e0131002.
19. Schumacher S, Kirschbaum C, Fydrich T, et al. Is salivary alpha-amylase an indicator of autonomic nervous system dysregulations in mental disorders? A review of preliminary findings and the interactions with cortisol. *Psychoneuroendocrinology* 2013;38(6):729-43. doi: 10.1016/j.psyneuen.2013.02.003

- 1
- 2
- 3 20. Kemp AH, Quintana DS. The relationship between mental and physical health: insights from the
- 4 study of heart rate variability. *Int J Psychophysiol* 2013;89(3):288-96. doi:
- 5 10.1016/j.ijpsycho.2013.06.018
- 6 21. Miller AH, Raison CL. The role of inflammation in depression: from evolutionary imperative to
- 7 modern treatment target. *Nat Rev Immunol* 2016;16(1):22-34. doi: 10.1038/nri.2015.5
- 8 22. Kang HJ, Kim JM, Stewart R, et al. Association of SLC6A4 methylation with early adversity,
- 9 characteristics and outcomes in depression. *Prog Neuropsychopharmacol Biol Psychiatry*
- 10 2013;44:23-8. doi: 10.1016/j.pnpbp.2013.01.006 [published Online First: 2013/01/22]
- 11 23. Holsboer F. The corticosteroid receptor hypothesis of depression. *Neuropsychopharmacology*
- 12 2000;23(5):477-501. doi: 10.1016/S0893-133X(00)00159-7
- 13 24. Palazidou E. The neurobiology of depression. *Br Med Bull* 2012;101(1):127-45. doi:
- 14 10.1093/bmb/lds004
- 15 25. Morris MC, Compas BE, Garber J. Relations among posttraumatic stress disorder, comorbid major
- 16 depression, and HPA function: a systematic review and meta-analysis. *Clin Psychol Rev*
- 17 2012;32(4):301-15. doi: 10.1016/j.cpr.2012.02.002
- 18 26. Stetler C, Miller GE. Depression and hypothalamic-pituitary-adrenal activation: A quantitative
- 19 summary of four decades of research. *Psychosom Med* 2011;73(2):114-26. doi:
- 20 10.1097/PSY.0b013e31820ad12b
- 21 27. Bagley SL, T.L. W, T.W. B. Sex differences in physiological and affective responses to stress in
- 22 remitted depression. *Physiol Behav* 2011;104(2):180-86. doi: 10.1016/j.physbeh.2011.03.004
- 23 28. Tanaka Y, Ishitobi Y, Maruyama Y, et al. Salivary alpha-amylase and cortisol responsiveness
- 24 following electrical stimulation stress in major depressive disorder patients. *Prog*
- 25 *Neuropsychopharmacol Biol Psychiatry* 2012;36:220-4.
- 26 29. Bosch JA, Veerman EC, de Geus EJ, et al. Alpha-amylase as a reliable and convenient measure of
- 27 sympathetic activity: Don't start salivating just yet! *Psychoneuroendocrinology* 2011;36:449-
- 28 53.
- 29 30. Nater UM, Rohleder N. Salivary alpha-amylase as a non-invasive biomarker for the sympathetic
- 30 nervous system: current state of research. *Psychoneuroendocrinology* 2009;34(4):486-96.
- 31 doi: 10.1016/j.psyneuen.2009.01.014
- 32 31. Rohleder N, Chen E, Wolf JM, et al. The psychobiology of trait shame in young women: Extending
- 33 the social self preservation theory. *Health Psychol* 2008;27(5):523-32. doi: 10.1037/0278-
- 34 6133.27.5.523
- 35 32. Verkuil B, Brosschot JF, Marques AH, et al. Gender differences in the impact of daily sadness on
- 36 24-h heart rate variability. *Psychophysiology* 2015;52:1682-8.
- 37 33. Jarczok MN, Aguilar-Raab C, Koenig J, et al. The heart's rhythm 'n' blues: Sex differences in
- 38 circadian variation patterns of vagal activity vary by depressive symptoms in predominantly
- 39 healthy employees. *Chronobiol Int* 2018;1-14. doi: 10.1080/07420528.2018.1439499
- 40 34. Jarczok MN, Koenig J, Shively CA, et al. Behavioral depression is associated with increased vagally
- 41 mediated heart rate variability in adult female cynomolgus monkeys (*Macaca fascicularis*). *Int*
- 42 *J Psychophysiol* 2017;Epub ahead of print doi: 10.1016/j.ijpsycho.2017.11.004
- 43 35. Maletic V, Robinson M, Oakes T, et al. Neurobiology of depression: an integrated view of key
- 44 findings. *Int J Clin Pract* 2007;61(12):2030-40. doi: 10.1111/j.1742-1241.2007.01602.x
- 45 36. Pace TWW, Mletzko TC, Alagbe O, et al. Increased stress-induced inflammatory responses in male
- 46 patients with major depression and increased early life stress. *Am J Psychiatry*
- 47 2006;163(9):1630-3. doi: 10.1176/appi.ajp.163.9.1630
- 48 37. Raison CL, Capuron L, Miller AH. Cytokines sing the blues: Inflammation and the pathogenesis of
- 49 depression. *Trends Immunol* 2006;27(1):24-31. doi: 10.1016/j.it.2005.11.006
- 50 38. Menke A, Binder EB. Epigenetic alterations in depression and antidepressant treatment.
- 51 *Dialogues Clin Neurosci* 2014;16(3):395-404.
- 52 39. Alasaari JS, Lagus M, Ollila HM, et al. Environmental stress affects DNA methylation of a CpG rich
- 53 promoter region of serotonin transporter gene in a nurse cohort. *PLoS One*
- 54 2012;7(9):e45813. doi: 10.1371/journal.pone.0045813 [published Online First: 2012/10/03]
- 55
- 56
- 57
- 58
- 59
- 60

- 1  
2  
3 40. Klengel T, Pape J, Binder EB, et al. The role of DNA methylation in stress-related psychiatric  
4 disorders. *Neuropharmacology* 2014;80:115-32. doi: 10.1016/j.neuropharm.2014.01.013  
5 [published Online First: 2014/01/24]
- 6 41. Voisey J, Young RM, Lawford BR, et al. Progress towards understanding the genetics of  
7 posttraumatic stress disorder. *J Anxiety Disord* 2014;28(8):873-83. doi:  
8 10.1016/j.janxdis.2014.09.014
- 9 42. Jack A, Connelly JJ, Morris JP. DNA methylation of the oxytocin receptor gene predicts neural  
10 response to ambiguous social stimuli. *Front Hum Neurosci* 2012;6:1-7. doi:  
11 10.3389/fnhum.2012.00280
- 12 43. Walum H, Lichtenstein P, Neiderhiser JM, et al. Variation in the oxytocin receptor gene (OXTR) is  
13 associated with pair-bonding and social behavior. *Biol Psychiatry* 2012;71(5):419-26. doi:  
14 10.1016/j.biopsych.2011.09.002
- 15 44. Woods R, Bedard M, McQuaid RJ, et al. Rejection sensitivity and multiple group memberships:  
16 The moderating role of an oxytocin receptor gene polymorphism. *Soc Neurosci* 2017:1-9. doi:  
17 10.1080/17470919.2017.1327458 [published Online First: 2017/05/06]
- 18 45. Booij L, Szyf M, Carballido A, et al. DNA methylation of the serotonin transporter gene in  
19 peripheral cells and stress-related changes in hippocampal volume: A study in depressed  
20 patients and healthy controls. *PLoS One* 2015;10(3):e0119061. doi:  
21 10.1371/journal.pone.0119061
- 22 46. Sugawara H, Bundo M, Asai T, et al. Effects of quetiapine on DNA methylation in neuroblastoma  
23 cells. *Prog Neuropsychopharmacol Biol Psychiatry* 2015;56:117-21. doi:  
24 10.1016/j.pnpbp.2014.08.010
- 25 47. Zannas AS, West AE. Epigenetics and the regulation of stress vulnerability and resilience.  
26 *Neuroscienc* 2014;264:157-70. doi: 10.1016/j.neuroscience.2013.12.003
- 27 48. Szyf M, Tang YY, Hill KG, et al. The dynamic epigenome and its implications for behavioral  
28 interventions: a role for epigenetics to inform disorder prevention and health promotion.  
29 *Transl Behav Med* 2016;6(1):55-62. doi: 10.1007/s13142-016-0387-7
- 30 49. Roberts S, Lester KJ, Hudson JL, et al. Serotonin transporter methylation and response to cognitive  
31 behaviour therapy in children with anxiety disorders. *Transl Psychiatry* 2014;4:e444. doi:  
32 10.1038/tp.2014.83
- 33 50. Zhao J, Goldberg J, Bremner JD, et al. Association between promoter methylation of serotonin  
34 transporter gene and depressive symptoms: A monozygotic twin study. *Psychosom Med*  
35 2013;75:523-29. doi: 0033-3174/13/7506Y0523
- 36 51. Shapiro SL, Carlson LE, Astin JA, et al. Mechanisms of mindfulness. *J Clin Psychol* 2006;62(3):373-  
37 86. doi: 10.1002/jclp.20237
- 38 52. Kabat-Zinn J. Full catastrophe living: Using the wisdom of your mind and body to face stress, pain,  
39 and illness. New York: Delacorte 1990.
- 40 53. Bishop SR, Lau M, Shapiro S, et al. Mindfulness: A proposed operational definition. *Clin Psychol Sci*  
41 *Pract* 2004;11:230-41.
- 42 54. Grossman P, Niemann L, Schmidt S, et al. Mindfulness-based stress reduction and health benefits.  
43 A meta-analysis. *J Psychosom Res* 2004;57(1):35-43. doi: 10.1016/S0022-3999(03)00573-7
- 44 55. Kabat-Zinn J. Mindfulness-Based interventions in context: Past, present, and future. *Clin Psychol*  
45 *Sci Pract* 2003;10(2):144-56. doi: 10.1093/clipsy.bpg016
- 46 56. Michalak J, Schultze M, Heidenreich T, et al. A randomized controlled trial on the efficacy of  
47 mindfulness-based cognitive therapy and a group version of cognitive behavioral analysis  
48 system of psychotherapy for chronically depressed patients. *J Consult Clin Psychol*  
49 2015;83(5):951-63. doi: 10.1037/ccp0000042
- 50 57. Keng SL, Smoski MJ, Robins CJ. Effects of mindfulness on psychological health: A review of  
51 empirical studies. *Clin Psychol Rev* 2011;31(6):1041-56. doi: 10.1016/j.cpr.2011.04.006
- 52 58. Nila K, Holt DV, Ditzen B, et al. Mindfulness-based stress reduction (MBSR) enhances distress  
53 tolerance and resilience through changes in mindfulness. *Mental Health & Prevention*  
54 2016;4(1):36-41. doi: 10.1016/j.mhp.2016.01.001
- 55  
56  
57  
58  
59  
60



- 1  
2  
3 59. Segal ZV, Williams JMG, Teasdale JD. Mindfulness-based cognitive therapy for depression. 1 ed.  
4 New York: Guilford Press 2002.
- 5 60. Khoury B, Lecomte T, Fortin G, et al. Mindfulness-based therapy: A comprehensive meta-analysis.  
6 *Clin Psychol Rev* 2013;33(6):763-71. doi: 10.1016/j.cpr.2013.05.005
- 7 61. Ozawa-de Silva B, Negi LT. Cognitively-Based Compassion Training: Protocol and key concepts.  
8 Singer, T. and Bolz, M. Compassion: Bridging Theory and Practice. Leipzig: Max Planck  
9 Institute for Human Cognitive and Brain Sciences 2013:416-38.
- 10 62. Dodds SE, Pace TW, Bell ML, et al. Feasibility of Cognitively-Based Compassion Training (CBCT) for  
11 breast cancer survivors: A randomized, wait list controlled pilot study. *Support Care Cancer*  
12 2015;23(12):3599-608. doi: 10.1007/s00520-015-2888-1 [published Online First: 2015/08/16]
- 13 63. Desbordes G, Negi LT, Pace TW, et al. Effects of mindful-attention and compassion meditation  
14 training on amygdala response to emotional stimuli in an ordinary, non-meditative state.  
15 *Front Hum Neurosci* 2012;6:292. doi: 10.3389/fnhum.2012.00292 [published Online First:  
16 2012/11/06]
- 17 64. Strauss C, Lever Tayler B, Gu J, et al. What is compassion and how can we measure it? A review of  
18 definitions and measures. *Clin Psychol Rev* 2016;47:15-27. doi: 10.1016/j.cpr.2016.05.004
- 19 65. Fredrickson BL, Cohn MA, Coffey KA, et al. Open hearts build lives: positive emotions, induced  
20 through loving-kindness meditation, build consequential personal resources. *J Pers Soc*  
21 *Psychol* 2008;95(5):1045-62. doi: 10.1037/a0013262
- 22 66. Hutcherson CA, Seppala EM, Gross JJ. Loving-kindness meditation increases social connectedness.  
23 *Emotion* 2008;8(5):720-4. doi: 10.1037/a0013237
- 24 67. Pace TWW, Negi LT, Adame DD, et al. Effect of compassion meditation on neuroendocrine, innate  
25 immune and behavioral responses to psychosocial stress. *Psychoneuroendocrinology*  
26 2009;34(1):87-98. doi: 10.1016/j.psyneuen.2008.08.011
- 27 68. Carson JW, Carson KM, Gil KM, et al. Mindfulness-based relationship enhancement (MBRE) in  
28 couples. In: Baer RA, ed. Mindfulness-based treatment approaches: Clinician's guide to  
29 evidence base and applications. Burlington, MA: Academic Press 2006:309-31
- 30 69. Wachs K, Cordova JV. Mindful relating: exploring mindfulness and emotion repertoires in intimate  
31 relationships. *J Marital Fam Ther* 2007;33(4):464-81. doi: 10.1111/j.1752-0606.2007.00032.x  
32 [published Online First: 2007/10/16]
- 33 70. Barnes S, Brown KW, Krusemark E, et al. The role of mindfulness in romantic relationship  
34 satisfaction and responses to relationship stress. *J Marital Fam Ther* 2007;33(4):482-500. doi:  
35 10.1111/j.1752-0606.2007.00033.x [published Online First: 2007/10/16]
- 36 71. Neff KD. The development and validation of a scale to measure self-compassion. *Self Identity*  
37 2003;2(3):223-50. doi: 10.1080/15298860390209035
- 38 72. Yarnell LM, Neff KD. Self-compassion, interpersonal conflict resolutions, and well-being. *Self*  
39 *Identity* 2013;12:146-59.
- 40 73. Falkai P, Wittchen H-U. Diagnostisches und Statistisches Manual Psychischer Störungen - DSM-5.  
41 Göttingen: Hogrefe 2014:1298.
- 42 74. Hamilton M. A rating scale for depression. *J Neurol Neurosurg Psychiatry* 1960;23:56-62.
- 43 75. Beck AT, Steer RA, Ball R, et al. Comparison of Beck Depression Inventories -IA and -II in  
44 psychiatric outpatients. *J Pers Assess* 1996;67(3):588-97. doi: 10.1207/s15327752jpa6703\_13
- 45 76. DGPPN, BÄK, KBV, et al. S3-Leitlinie/Nationale VersorgungsLeitlinie Unipolare Depression –  
46 Langfassung. 2. Aufl. ed 2015.
- 47 77. Hahlweg K, Kraemer M, Schindler L, et al. Partnerschaftsprobleme: Eine empirische Analyse. *Z*  
48 *Klin Psychol* 1980;9:159-69.
- 49 78. Altman DG, Schulz KF, Moher D, et al. The revised CONSORT statement for reporting randomized  
50 trials: explanation and elaboration. *Ann Intern Med* 2001;134(8):663-94. [published Online  
51 First: 2001/04/17]
- 52 79. Cohen S. Social relationships and health. *Am Psychol* 2004;59(8):676-84. doi: 10.1037/0003-  
53 066X.59.8.676
- 54 80. Beach SR, Sandeen EE, O'leary KD. Depression in Marriage. New York: Guilford Press 1990.
- 55  
56  
57  
58  
59  
60

- 1
- 2
- 3 81. Cohen S, Daniel O'Leary K, Foran HM, et al. Mechanisms of change in brief couple therapy for  
4 depression. *Behav Ther* 2014;45(3):402-17. doi: 10.1016/j.beth.2014.01.003
- 5 82. Hahlweg K, Baucom DH. Partnerschaft und Sörung. 1 ed: Hogrefe 2008.
- 6 83. Kröger C, Heinrichs N, Hahlweg K. Kompetenz-, Kommunikations- und Problemlösetraining  
7 [Competence training, communication training, and problem-solving training]. In: Hautzinger  
8 M, Pauli P, eds. Göttingen: Hogrefe 2009.
- 9 84. Schindler L, Hahlweg K, Revenstorf D. Partnerschaftsprobleme: Diagnose und Therapie. Handbuch  
10 für den Therapeuten. 2 ed. Berlin: Springer 2006.
- 11 85. Carson JW, Carson KM, Gil KM, et al. Mindfulness-Based Relationship Enhancement. *Behav Ther*  
12 2003;35(3):471-94.
- 13 86. McCullough Jr J. Treatment for chronic depression: CBASP. New York: Guilford 2000.
- 14 87. Singer T, Bornemann B. The ReSource training protocol. In: Singer T, Bornemann B, eds.  
15 Compassion: Bridging practice and science. Leipzig: Max Planck Institute for Human Cognitive  
16 and Brain Sciences 2013:452-65.
- 17 88. Bundespsychotherapeutenkammer. BPTK -Studie zu Wartezeiten in der ambulanten  
18 psychotherapeutischen Versorgung – Umfrage der Landespsychotherapeutenkammern und  
19 der BPTK. [www.bptk.de](http://www.bptk.de), 2011.
- 20 89. Geller SM, Greenberg LS, Watson JC. Therapist and client perceptions of therapeutic presence:  
21 the development of a measure. *Psychother Res* 2010;20(5):599-610. doi:  
22 10.1080/10503307.2010.495957
- 23 90. Del Re AC, Fluckiger C, Goldberg SB, et al. Monitoring mindfulness practice quality: an important  
24 consideration in mindfulness practice. *Psychother Res* 2013;23(1):54-66. doi:  
25 10.1080/10503307.2012.729275
- 26 91. Mander J. The individual therapy process questionnaire: development and validation of a revised  
27 measure to evaluate general change mechanisms in psychotherapy. *Clin Psychol Psychother*  
28 2015;22(4):328-45. doi: 10.1002/cpp.1892
- 29 92. Watson D, Clark LA, Tellegen A. Development and validation of brief measures of positive and  
30 negative affect: The PANAS Scales. *J Pers Soc Psychol* 1988;54(6):1063-70.
- 31 93. Baumann U. Methodische Untersuchungen zur Hamilton-Depression-Skala. *Arch Psychiatr*  
32 *Nervenkr* 1976;222(4):359-75.
- 33 94. Herzberg PY, Goldschmidt S, Heinrichs N. Beck Depressions-Inventar (BDI-II). Revision. *TBS-TK*  
34 *Rezession* 2008
- 35 95. Pruessner JC, Kirschbaum C, Meinlschmid G, et al. Two formulas for computation of the area  
36 under the curve represent measures of total hormone concentration versus time-dependent  
37 change. *Psychoneuroendocrinology* 2003;28(7):916-31.
- 38 96. Heart rate variability: Standards of measurement, physiological interpretation, and clinical use.  
39 Task Force of The European Society of Cardiology and The North American Society of Pacing  
40 and Electrophysiology. *Circulation* 1996;93(5):1043-65.
- 41 97. Garcia CA, Otero A, Presedo J, et al. A software toolkit for nonlinear Heart Rate Variability  
42 analysis. Computing in Cardiology Conference (CinC), 2013.
- 43 98. National Institute of Mental Health. Research Domain Criteria (RDoC) 2013 [Available from:  
44 [https://www.nimh.nih.gov/research-priorities/rdoc/development-and-definitions-of-the-](https://www.nimh.nih.gov/research-priorities/rdoc/development-and-definitions-of-the-rdoc-domains-and-constructs.shtml)  
45 [rdoc-domains-and-constructs.shtml](https://www.nimh.nih.gov/research-priorities/rdoc/development-and-definitions-of-the-rdoc-domains-and-constructs.shtml) accessed 02.02.2017.
- 46 99. Riganello F, Dolce G, Sannita WG. Heart rate variability and the central autonomic network in  
47 severe disorder of consciousness. *J Rehabil Med* 2012;44:495-501. doi: 10.2340/16501977-  
48 0975
- 49 100. Thayer JF, Ahs F, Fredrikson M, et al. A meta-analysis of heart rate variability and neuroimaging  
50 studies: implications for heart rate variability as a marker of stress and health. *Neurosci*  
51 *Biobehav Rev* 2012;36(2):747-56. doi: 10.1016/j.neubiorev.2011.11.009
- 52 101. Critchley HD, Mathias CJ, Josephs O, et al. Human cingulate cortex and autonomic control:  
53 converging neuroimaging and clinical evidence. *Brain* 2003;126(10):2139-52. doi:  
54 10.1093/brain/awg216
- 55
- 56
- 57
- 58
- 59
- 60

- 1  
2  
3 102. Holzman JB, Bridgett DJ. Heart rate variability indices as bio-markers of top-down self-regulatory  
4 mechanisms: A meta-analytic review. *Neurosci Biobehav Rev* 2017;74:233-55. doi:  
5 10.1016/j.neubiorev.2016.12.032
- 6 103. Bassett D. A literature review of heart rate variability in depressive and bipolar disorders. *Aust N*  
7 *Z J Med* 2016;50(6):511-19. doi: 10.1177/0004867415622689
- 8 104. Kuo TBJ, Lai CJ, Huang YT, et al. Regression analysis between heart rate variability and  
9 baroreflex-related vagus nerve activity in rats. *J Cardiovasc Electrophysiol* 2005;16(8):864-69.  
10 doi: 10.1111/j.1540-8167.2005.40656.x
- 11 105. Thayer JF, Lane RD. Claude Bernard and the heart-brain connection: Further elaboration of a  
12 model of neurovisceral integration. *Neurosci Biobehav Rev* 2009;33(2):81-88. doi:  
13 10.1016/j.neubiorev.2008.08.004
- 14 106. Fernández JR, Hermida RC, Mojón A. Chronobiological analysis techniques. Application to blood  
15 pressure. *Philosophical Transactions of the Royal Society A* 2009;367:431-45. doi:  
16 10.1098/rsta.2008.0231
- 17 107. Refinetti R, Cornélissen G, Halberg F. Procedures for numerical analysis of circadian rhythms.  
18 *Biol Rhythm Res* 2007;38(4):275-325. doi: 10.1080/09291010600903692
- 19 108. Faul F, Erdfeld E, Lang AG, et al. A flexible statistical power analysis program for the social,  
20 behavioral, and biomedical sciences. *Behav Res Methods* 2007;39(2):175-91.
- 21 109. van Aalderen JR, Donders AR, Giommi F, et al. The efficacy of mindfulness-based cognitive  
22 therapy in recurrent depressed patients with and without a current depressive episode: A  
23 randomized controlled trial. *Psychol Med* 2012;42(5):989-1001. doi:  
24 10.1017/s0033291711002054 [published Online First: 2011/10/25]
- 25 110. National Institute of Mental Health. Research Domain Criteria (RDoC) 2017 [Available from:  
26 [http://www.nimh.nih.gov/research-priorities/rdoc/development-and-definitions-of-the-](http://www.nimh.nih.gov/research-priorities/rdoc/development-and-definitions-of-the-rdoc-domains-and-constructs.shtml)  
27 [rdoc-domains-and-constructs.shtml](http://www.nimh.nih.gov/research-priorities/rdoc/development-and-definitions-of-the-rdoc-domains-and-constructs.shtml).]
- 28 111. Pace TWW, Negi LT, Dodson-Lavelle B, et al. Engagement with Cognitively-Based Compassion  
29 Training is associated with reduced salivary C-reactive protein from before to after training in  
30 foster care program adolescents. *Psychoneuroendocrinology* 2013;38(2):294-99. doi:  
31 10.1016/j.psyneuen.2012.05.019
- 32 112. Reddy SD, Negi LT, Dodson-Lavelle B, et al. Cognitive-Based Compassion Training: A promising  
33 prevention strategy for at-risk adolescents. *J Child Fam Stud* 2013;22(2):219-30. doi:  
34 10.1007/s10826-012-9571-7
- 35 113. Shonin E, Van Gordon W, Compare A, et al. Buddhist-derived loving-kindness and compassion  
36 meditation for the treatment of psychopathology: a systematic review. *Mindfulness*  
37 2015;6(5):1161-80. doi: 10.1007/s12671-014-0368-1
- 38 114. Pace TWW, Negi LT, Sivilli TI, et al. Innate immune, neuroendocrine and behavioral responses to  
39 psychosocial stress do not predict subsequent compassion meditation practice time.  
40 *Psychoneuroendocrinology* 2010;35(2):310-15. doi: 10.1016/j.psyneuen.2009.06.008
- 41 115. Schulz U, Schwarzer R. Soziale Unterstützung bei der Krankheitsbewältigung: Die Berliner Social  
42 Support Skalen (BSSS). *Diagnostica* 2003;49(2):73-82.
- 43 116. Sprecher S, Fehr B. Compassionate love for close others and humanity. *J Soc Pers Relat* 2005 doi:  
44 10.1177/0265407505056439
- 45 117. Aguilar-Raab C, Grevenstein D, Schweitzer J. Measuring Social Relationships in Different Social  
46 Systems: The Construction and Validation of the Evaluation of Social Systems (EVOS) Scale.  
47 *PLoS One* 2015;10(7):e0133442-e42. doi: 10.1371/journal.pone.0133442
- 48 118. Aguilar-Raab C, Grevenstein D, Gotthardt L, et al. Changing me, changing us: relationship quality  
49 and collective efficacy as major outcomes in systemic couple therapy. *Fam Process* 2017 doi:  
50 10.1111/famp.12302 [published Online First: 2017/06/29]
- 51 119. Russell DW. UCLA Loneliness Scale (Version 3): reliability, validity, and factor structure. *J Pers*  
52 *Assess* 1996;66(1):20-40. doi: 10.1207/s15327752jpa6601\_2
- 53 120. Doring N, Bortz J. Psychometrische Einsamkeitsforschung. Deutsche Neukonstruktion der UCLA  
54 Loneliness Scale. *Diagnostica* 1993;39:224-39.
- 55  
56  
57  
58  
59  
60

- 1  
2  
3 121. Baer RA, Smith GT, Allen KB. Assessment of mindfulness by self-report: The Kentucky Inventory  
4 of Mindfulness Skills. *Assessment* 2004;11(3):191-206. doi: 10.1177/1073191104268029  
5 122. Ströhle G, Nachtigall C, Michalak J, et al. Die Erfassung von Achtsamkeit als mehrdimensionales  
6 Konstrukt: Die deutsche Version des Kentucky Inventory of Mindfulness Skills (KIMS-D) *Z Klin  
7 Psychol Psychother* 2010;39:1-12. doi: 10.1026/1616-3443/a000001  
8 123. Hahlweg K. Konstruktion und Validierung des Partnerschaftsfragebogens PFB. *Z Klin Psychol  
9* 1979;8(1):17-40.  
10 124. Spitzer RL, Kroenke K, Williams JB. Validation and utility of a self-report version of PRIME-MD:  
11 the PHQ primary care study. Primary Care Evaluation of Mental Disorders. Patient Health  
12 Questionnaire. *JAMA* 1999;282(18):1737-44.  
13 125. Löwe B, Spitzer RL, Zipfel S, et al. PHQ-D: Gesundheitsfragebogen für Patienten. Karlsruhe: Pfizer  
14 2002.  
15 126. Hendrick SS. A Generic measure of relationship satisfaction. *Journal of Marriage and Family  
16* 1988;50 (1):93-98. doi: 10.2307/352430  
17 127. Hupfeld J, Ruffieux N. Validierung einer deutschen Version der Self-Compassion Scale (SCS-D). *Z  
18 Klin Psychol Psychother* 2011;40(2):115-23. doi: 10.1026/1616-3443/a000088  
19 128. Schulz P, Schlotz W, Becker P. Trier Inventar zum chronischen Stress (TICS) Göttingen: Hogrefe  
20 2004.  
21 129. Bernstein DP, Fink L. Childhood Trauma Questionnaire: A retrospective self-report manual. San  
22 Antonio: TX: The Psychological Corporation 1998.  
23 130. Thomas A, Brähler E, Strauß B. IIP-32: Entwicklung, Validierung und Normierung einer Kurzform  
24 des Inventars zur Erfassung interpersonaler Probleme. *Diagnostica* 2011;57(2):68-83.  
25 131. Horowitz LM, Rosenberg SE, Baer BA, et al. Inventory of interpersonal problems: Psychometric  
26 properties and clinical applications. *J Consult Clin Psychol* 1998;56(6): 885-92.  
27 132. Wittchen H-U, Wunderlich U, Gruschwitz S, et al. Strukturiertes Klinisches Interview für DSM-IV  
28 Achse I: Psychische Störungen. Göttingen: Hogrefe 1997.  
29  
30  
31  
32  
33  
34  
35  
36  
37  
38  
39  
40  
41  
42  
43  
44  
45  
46  
47  
48  
49  
50  
51  
52  
53  
54  
55  
56  
57  
58  
59  
60



Fig. 1 Study Design.

PSI = Positive Social Interaction; TAU = Treatment as usual; CBCT®-fc = Cognitively-Based Compassion Training for Couples; T1 = measurement point 1 (baseline); T2 = measurement point 2 (post intervention); FU1/2 = follow-up 1 and 2

190x107mm (300 x 300 DPI)

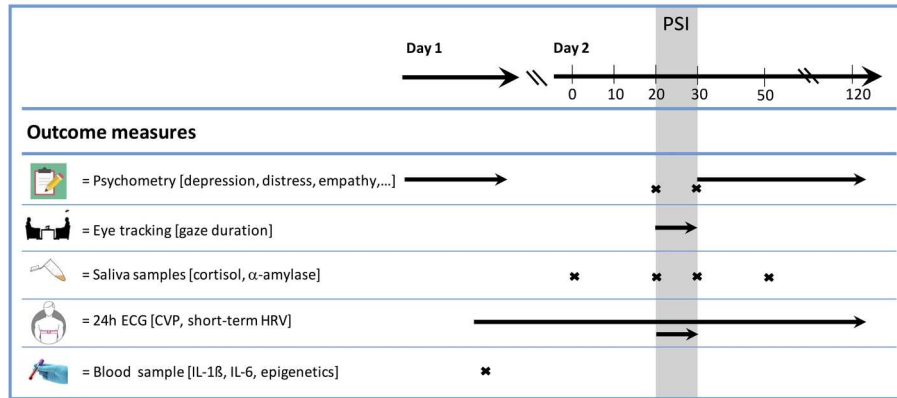

Fig. 2 Assessments.

PSI = Positive Social Interaction, ECG = electrocardiogram, CVP = circadian variation pattern, HRV = heart rate variability, IL = interleukin

190x107mm (300 x 300 DPI)



Fig. 3 Flow diagram.

HDRS = Hamilton Depression Rating Scale, BDI = Beck Depression Inventory, SCID = Structured Clinical Interview for DSM, ECG = electrocardiogram, PSI = positive social interaction, CBCT®-fC = Cognitively-Based Compassion Training for Couples, TAU = Treatment as usual, TPI = Therapeutic Presence Inventory, PQ = Practice Quality, SACiP = Scale for the Multiperspective Assessment of General Change Mechanisms in Psychotherapy

275x397mm (300 x 300 DPI)

## APPENDIX 1: Example laboratory set up



A: Homogeneous grey wall enhancing detection; B: Stand with calibration screen grid, swings towards nose with central point (arrow); C: Stand with Full HD Scene cam; D: Live view of scene cam with red dot indicating gaze point; E: Eye-tracker; F: height adjustable chair.

Note: The two persons depicted here, are lab members who gave written consent publishing this picture.





## UniversitätsKlinikum Heidelberg

Institut für Medizinische Psychologie | Bergheimer Str. 20 | 69115 Heidelberg

# Einwilligungserklärung zur Studie: „Psychobiologische Marker und reales Interaktionsverhalten bei Depression: CBCT-Studie“

Version 3.0

Proband (Name, Vorname):

Geb.-Datum: \_\_\_\_\_ . \_\_\_\_\_ . \_\_\_\_\_

ID-Aufkleber:  
(Pseudonym)

Hiermit erkläre ich meine Einwilligung zur Teilnahme an dem Forschungsprojekt gemäß der vorstehenden Information. Durch meine Unterschrift bestätige ich, dass ich den Inhalt der Information gelesen und verstanden habe. Ich hatte Gelegenheit Fragen zu stellen, die mir zufriedenstellend beantwortet wurden. Ich weiß, dass meine Teilnahme freiwillig ist und ich meine Einwilligung jederzeit ohne Angabe von Gründen widerrufen und die Vernichtung meiner Blut- und Speichelproben sowie aller Daten fordern kann, ohne dass mir daraus irgendwelche Nachteile entstehen.

- Ich bin ausdrücklich damit einverstanden, dass meine Daten und Biomaterialien für den in der Informationsschrift benannten Forschungszweck verwendet werden.
- Ich stimme ausdrücklich zu, dass das Eigentum der mir entnommenen Biomaterialien an das Institut für Medizinische Psychologie des Universitätsklinikums Heidelberg übertragen wird.

Mir ist bewusst, dass ich nicht notwendigerweise einen persönlichen Vorteil aus diesem Forschungsprojekt haben werde.

Aus den mir entnommenen Körpermaterialien können wider Erwarten medizinische Erkenntnisse, sogenannte Zufallsbefunde, erlangt werden, die für die Erhaltung oder Wiederherstellung meiner eigenen Gesundheit von erheblicher Bedeutung sein können. Nachstehend können Sie entscheiden wie die Studienleitung damit umgehen soll:

- Ja, ich möchte über Zufallsbefunde meiner Untersuchung informiert werden.
- Nein, ich möchte über Zufallsbefunde meiner Untersuchung **nicht** informiert werden.

DF

### Zentrum für Psychosoziale Medizin

Klinik für Allgemeine Psychiatrie  
mit Poliklinik

Prof. Dr. Sabine Herpertz

Klinik für Psychosomatische u. Allgemeine  
Klinische Medizin

Prof. Dr. W. Herzog

Klinik für Kinder- u. Jugendpsychiatrie

Prof. Dr. F. Resch

**Institut für Medizinische Psychologie**

**Prof. Dr. B. Ditzen**

Institut für Psychosoziale Prävention

Prof. Dr. phil. Svenja Taubner

### Forschungsteam:

**Prof. Dr. Beate Ditzen**

Direktorin des Instituts für Medizinische  
Psychologie

### Projektleitung:

**Dr. Corina Aguilar-Raab, Dipl.-Psych.**

[Corina.Aguilar-Raab@med.uni-heidelberg.de](mailto:Corina.Aguilar-Raab@med.uni-heidelberg.de)

**Dr. Marc N. Jarczok, Dipl. SoWi**

[marc.jarczok@med.uni-heidelberg.de](mailto:marc.jarczok@med.uni-heidelberg.de)

Institut für Medizinische Psychologie im  
Zentrum für Psychosoziale Medizin des  
UniversitätsKlinikums Heidelberg

Bergheimer Straße 20  
D-69115 Heidelberg

Tel.: Dr. Aguilar-Raab & Dr. Jarczok  
06221/568135



Weiterhin ist mir bewusst, dass zum Zwecke der Erhebung von weiteren Verlaufsdaten die Möglichkeit besteht, mich zu einem späteren Zeitpunkt erneut zu kontaktieren, um ergänzende Informationen und/oder Biomaterialien von mir zu erbitten.

Eine mögliche Kontaktaufnahme erfolgt über die Studienleiterin:

Prof. Dr. phil. Dipl.- Psych. Beate Ditzen  
Institut für Medizinische Psychologie im  
Zentrum für Psychosoziale Medizin (ZPM)  
Universitätsklinikum Heidelberg  
Bergheimer Str. 20, D-69115 Heidelberg  
Tel.: +49 6221 56 8150  
E-Mail: [beate.ditzen@med.uni-heidelberg.de](mailto:beate.ditzen@med.uni-heidelberg.de)

#### Datenschutz:

Mir ist bekannt, dass bei diesem Forschungsvorhaben personenbezogene Daten, insbesondere biologische Befunde und Daten, die aus Fragebögen generiert werden, über mich erhoben, gespeichert und ausgewertet werden sollen. Die Verwendung der Angaben über diese biologischen Befunde und Daten erfolgt nach gesetzlichen Bestimmungen und setzt vor der Teilnahme an dem Forschungsvorhaben folgende freiwillig abgegebene Einwilligungserklärung voraus, das heißt ohne die nachfolgende Einwilligung kann ich nicht an dem Forschungsvorhaben teilnehmen.

1. Ich erkläre mich damit einverstanden, dass im Rahmen dieses Forschungsvorhabens personenbezogene Daten, insbesondere Angaben über biologische Befunde (gewonnen aus den entnommenen Blut- und Speichelproben) sowie Daten aus Fragebogenbefragungen, über mich erhoben und in Papierform sowie auf elektronischen Datenträgern im Universitätsklinikum Heidelberg aufgezeichnet werden. Die erhobenen Daten und Blutproben dürfen pseudonymisiert (verschlüsselt) an die Abteilung „Genetische Epidemiologie in der Psychiatrie“ des Zentralinstituts für Seelische Gesundheit in Mannheim zum Zwecke der wissenschaftlichen Auswertung weitergegeben werden.
2. Ich bin darüber aufgeklärt worden, dass ich jederzeit die Teilnahme an dem Forschungsvorhaben beenden kann. Beim Widerruf meiner Einwilligung, an dem Forschungsvorhaben teilzunehmen, habe ich das Recht, die Löschung aller meiner bis dahin gespeicherten personenbezogenen Daten und die Vernichtung aller erhobenen Biomaterialien (Blut- und Speichelproben) zu verlangen.
3. Ich erkläre mich damit einverstanden, dass meine Daten und Biomaterialien nach Beendigung oder Abbruch des Forschungsvorhabens für maximal 10 Jahre aufbewahrt werden. Danach werden meine personenbezogenen Daten gelöscht, soweit nicht gesetzliche oder satzungsmäßige Aufbewahrungsfristen der Löschung entgegenstehen.

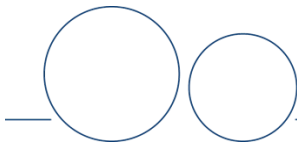

4. Ich erkläre mich damit einverstanden, dass die erhobenen Daten nach Beendigung der Studie der nationalen und internationalen Wissenschaft in anonymisierter Form durch eine Veröffentlichung über das Forschungsdatenrepositorium der Universität Heidelberg „heiDATA“ zugänglich gemacht werden. Dies dient zusätzlich der wissenschaftlichen Qualitätssicherung im Sinne der Nachvollziehbarkeit der erbrachten Studienergebnisse. Eine Aufbewahrung der Daten bei heiDATA erfolgt **ohne** persönliche Identifikatoren (z.B. Name oder Kontaktdaten). Die auf diese Weise veröffentlichten Daten sowie auch Veröffentlichungen in wissenschaftlichen Fachartikeln, welche die Daten in anonymisierter Form verwenden, bleiben dauerhaft öffentlich verfügbar.

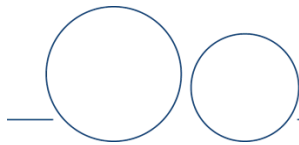

**Eine Kopie der Probandeninformation und Einwilligungserklärung habe ich erhalten. Das Original verbleibt beim Institut für Medizinische Psychologie des Universitätsklinikums Heidelberg.**

\_\_\_\_\_  
**Name des Probanden in Druckbuchstaben**

Heidelberg, den

\_\_\_\_\_  
**Ort, Datum**

\_\_\_\_\_  
**Unterschrift des Probanden**

**Ich habe das Aufklärungsgespräch geführt und die Einwilligung des Probanden eingeholt.**

\_\_\_\_\_  
**Name des Fachpersonals in Druckbuchstaben**

Heidelberg, den

\_\_\_\_\_  
**Ort, Datum**

\_\_\_\_\_  
**Unterschrift des Fachpersonals**



## UniversitätsKlinikum Heidelberg

Institut für Medizinische Psychologie | Bergheimer Str. 20 | 69115 Heidelberg

### Informationsschrift für Frauen mit depressiver Erkrankung in Partnerschaft zur Studie: „Psychobiologische Marker und reales Interaktionsverhalten bei Depression: CBCT-Studie“

Version 3.0

Sehr geehrte Studienteilnehmerin,

herzlichen Dank für Ihr Interesse an unserer Studie mit dem Titel „*Psychobiologische Marker und reales Interaktionsverhalten: CBCT-Studie*“. Wir möchten Sie mit diesem Informationsschreiben über unsere Studie umfassend informieren.

#### 1. Unsere Studie: Worum geht es und warum ist sie wichtig?

Die Depression gehört zu den am weitesten verbreiteten psychischen Störungen weltweit. Nach wie vor sind die Ursachen für eine Depression ungeklärt und wir forschen intensiv zu möglichen Behandlungsansätzen. Nachgewiesen sind bei der Depression Veränderungen von Aufmerksamkeits-, Wahrnehmungs- und Denkprozessen. Diese könnten daran beteiligt sein, dass sich Erkrankte zurückziehen und Gefühle der Unverbundenheit und Einsamkeit auftreten. Ein relativ neuer Therapieansatz bei Depressionen sind Trainings, die auf Achtsamkeit und Mitgefühl fokussieren. Da bei einer Depression häufig zentrale soziale Beziehungen wie zum Beispiel Partnerschaft oder Ehebeeinträchtigt sein können, berichten oft auch die Partner von psychischen Belastungen (z.B. Stress). Somit könnte diese neue Interventionsform zentrale soziale Beziehungen wie die eigene Partnerschaft verbessern, sowie gesundheitsförderliche Effekte durch ein verringertes Stresserleben für beide Partner entfalten.

Im Rahmen dieser Studie möchten wir in einem ersten Teil deshalb überprüfen, **welche Unterschiede** es konkret zwischen Paaren mit und ohne an Depression erkrankter Partnerin gibt.

Hierbei untersuchen wir ein kurzes, angeleitetes **positives Partnerschaftsgespräch**, wozu wir Paare zu uns ins Institut für Medizinische Psychologie einladen. Wir sind an **Verhaltensbeobachtung**, aber auch an verschiedenen **Reaktionen auf körperlicher Ebene** (z.B. Ausmaß an vorhandenen Stresshormonen), die eine psychische Belastung „messbar“ machen, interessiert.

In einem zweiten Teil geht es darum, ob ein Achtsamkeits- und Mitgefühlsbasiertes Gruppentraining für Paare (sog. CBC-Training; entwickelt an der Emory Universität in Atlanta, USA): aus dem Englischen = „Cognitively-Based Compassion Training“ – kognitiv-basiertes Mitgefühlstraining) die Symptome der Depression vermindert und die Partnerschaftsqualität sowie mögliche negative Auswirkungen der Depres-

#### Zentrum für Psychosoziale Medizin

Klinik für Allgemeine Psychiatrie  
mit Poliklinik

Prof. Dr. Sabine Herpertz

Klinik für Psychosomatische u. Allgemeine  
Klinische Medizin

Prof. Dr. W. Herzog

Klinik für Kinder- u. Jugendpsychiatrie

Prof. Dr. F. Resch

**Institut für Medizinische Psychologie**

**Prof. Dr. B. Ditzen**

Institut für Psychosoziale Prävention

Prof. Dr. phil. Svenja Taubner

#### Forschungsteam:

**Prof. Dr. Beate Ditzen**

Direktorin des Instituts für Medizinische  
Psychologie

#### Projektleitung:

**Dr. Corina Aguilar-Raab, Dipl.-Psych.**

[Corina.Aguilar-Raab@med.uni-heidelberg.de](mailto:Corina.Aguilar-Raab@med.uni-heidelberg.de)

**Dr. Marc N. Jarczok, Dipl. SoWi**

[marc.jarczok@med.uni-heidelberg.de](mailto:marc.jarczok@med.uni-heidelberg.de)

Institut für Medizinische Psychologie im  
Zentrum für Psychosoziale Medizin des  
UniversitätsKlinikums Heidelberg

Bergheimer Straße 20  
D-69115 Heidelberg

Tel.: Dr. Aguilar-Raab & Dr. Jarczok  
06221/568135



sion auf die eigene körperliche Gesundheit (beispielsweise Stressreaktion) reduziert. Hierbei werden die teilnehmenden Paare per Zufallsprinzip zwei Gruppen zugeordnet: bei der einen Hälfte erfolgt das eben beschriebene CBC-Training, bei der anderen Hälfte nicht – diese Gruppe dient als Kontroll- bzw. Vergleichsgruppe.

Die zufällige Zuteilung (sogenannte Randomisierung) ist eines der wesentlichen Verfahren zur Sicherstellung der Verallgemeinerbarkeit der Studienergebnisse, daher kann die einmal getroffene Zuteilung von der Studienleitung nicht beeinflusst werden. Die Wahrscheinlichkeit, dass Sie in die CBC-Trainingsgruppe kommen, liegt bei 50 Prozent, wobei für die Vergleichsgruppe kein Nachteil entsteht, da beispielweise die bisherige, evtl. antidepressive Behandlung weitergeführt werden kann.

## 2. Welche Daten werden in der Studie erfasst?

In dieser Studie werden Selbstberichtsdaten (erfasst über Fragebögen) und körperliche/biologische Daten („Echtzeit-Blickbewegung/Eye-Tracking“, „Stress-Hormone“, „Stress-Enzyme“, „Stress-Physiologie“, „Immun-Parameter“, „24h Puls“ und „genetische Marker“) erhoben. Die körperlichen Daten werden hierbei zusammenfassend als **Biomaterial** bezeichnet.

## 3. Wie oft werden diese Daten erhoben?

Die unten beschriebene Datenerhebung erfolgt zwei Mal und in allen Gruppen: Sowohl bei der Gruppe, die das CBC-Training erhält, als auch bei der Gruppe ohne Training: Das erste Mal vor Beginn des Trainings und das zweite Mal nach 10 Wochen, bzw. nach Abschluss des Trainings. Circa 4 und 8 Wochen nach der zweiten Datenerhebung erfolgt eine online Fragebogenbefragung, die Sie von zuhause aus durchführen können.

## 4. Welcher Zeitaufwand geht hiermit einher?

Der Zeitaufwand gliedert sich wie folgt:

1. Telefonischer Erstkontakt (5-15 Min.) (bereits erfolgt).
2. Sie erhalten eine weitere Einladung in das Institut für Medizinische Psychologie. Im Rahmen des Labortags 1 findet ein vorbereitendes Gespräch, eine Screening-Erhebung und ein diagnostisches Interview sowie die Blutabnahme statt (heutiger Termin). Danach erhalten Sie und Ihr Partner einen Brustgurt, der Ihren Puls für ca. 24 Stunden im Alltag misst. Mit diesem werden Sie nach Hause entlassen (ca. 2,5 Stunden).
3. Wir bitten Sie, zuhause einige Fragebögen auszufüllen, die wir Ihnen nach dem 1. Tag mitgeben (ca. 30 Minuten).



- 1  
2  
3  
4  
5  
6  
7  
8  
9  
10  
11  
12  
13  
14  
15  
16  
17  
18  
19  
20  
21  
22  
23  
24  
25  
26
4. Labortag 2 am Institut für Medizinische Psychologie (zwischen 15 und 20 Uhr): Nach einer kurzen Vorbereitung erfolgt eine angeleitete 10-minütige positive soziale Interaktion mit Ihrem Partner. Während dieser Interaktion werden Ihre Blickbewegungen und weiterhin der Puls (Brustgurt) gemessen. Vor und nach der Interaktion werden insgesamt 4 Speichelproben entnommen (siehe Punkt 6 für genauere Angaben: **„Wie werden die Reaktionen auf körperlicher Ebene gemessen und warum? - Messungen der Blickbewegungen und des Pulses sowie die Entnahme von Biomaterialien Blut- und Speichelproben“**). Danach füllen Sie und Ihr Partner verschiedene Fragebögen aus. Im Anschluss werden Sie und Ihr Partner zu einem abschließendes Paargespräch gebeten. Die Gesamtdauer beträgt insgesamt ca. 160 Minuten.

27 Für diejenigen Paare, die auch an dem CBC-Training teilnehmen, erfolgen einmal wöchentliche, zweistündige Gruppen-Sitzungen, die ebenfalls zur Qualitätssicherung per Video aufgenommen werden. Am Ende jeder Sitzung erfolgt eine kurze Fragebogenbefragung (5 Min.). In den zehn Wochen des CBC-Trainings werden Übungen und teilweise Hausaufgaben bzw. Partnerübungen aufgegeben (jeweils 8-12 Min.). Sie werden vier Mal pro Woche morgens per Kurznachricht (sog. SMS) über Ihr Smartphone daran erinnert und zu Ihrer Übung und Ihrer Befindlichkeit befragt. In der SMS befindet sich dazu ein Link. Wenn Sie auf diesen Link klicken, gelangen Sie zu einer kurzen, internetbasierten Abfrage, welche die Dauer und Intensität sowie ihr aktuelles Befinden erfragt (1-3 Min.). Das Beantworten dieser Fragen können Sie überall dort umsetzen, wo Sie ein internetfähiges Gerät nutzen können (z.B. Ihr Smartphone, Ihren Laptop, Ihr Tablet-PC etc.).

30 Die Paare, die nicht am CBC-Training teilnehmen, werden nur einmal wöchentlich per SMS zu ihrer aktuellen Befindlichkeit befragt (5 Min.). Die Termine der einzelnen Untersuchungsschritte und des CBC-Trainings werden mit Ihnen einzeln abgestimmt – hierzu werden wir Sie zeitnah persönlich kontaktieren. Bei Rückfragen können Sie sich jederzeit an die Projektleiter (Dr. Corina Aguilar-Raab, Dr. Marc N. Jarczok) wenden. Die entsprechenden Kontaktinformationen der Projektleitung entnehmen Sie bitte der ersten Seite dieser Informationsschrift.

- 31  
32  
33  
34  
35  
36  
37  
38  
39  
40  
41  
42  
43  
44  
45  
46  
47  
48
5. **Wie werden die Reaktionen auf körperlicher Ebene gemessen und warum? - Messungen der Blickbewegungen und des Pulses sowie Entnahme von Biomaterialien Blut- und Speichelproben**

49 Der Nachweis biologischer Marker ist wichtig, da hierdurch deutlich wird, in welchem Maße Ihr Körper während einer positiven Interaktion mit Ihrem Partner unter Stress steht. Diese normale, körperliche Reaktion kann vom persönlichen Belastungsempfinden deutlich abweichen. Die akute Aktivierung der biologischen Stresssysteme ist eine normale Reaktion und birgt keinerlei Gefahren für Ihre Gesundheit.



Sie und Ihr Partner liefern uns durch Ihre Mitarbeit dabei wichtige Daten, um ein eventuell verändertes Verhalten zwischen Ihnen beiden im Vergleich zu weniger psychisch belasteten Paaren zu erkennen. Des Weiteren werden die Werte Ihrer Biomarker vor und nach 10 Wochen bzw. nach dem CBC-Training verglichen, womit das Potential des Trainings zur objektiven Verbesserung partnerschaftlicher Interaktion und ihrer individuellen psychischen Belastung gemessen wird.

Mögliche pathologische Zufallsbefunde, also Ergebnisse der Untersuchungen die für Sie gesundheitlich von erheblicher Bedeutung sind und/oder einer weiteren Untersuchung bedürfen, teilt Ihnen die Studienleitung direkt nach der Auswertung mit, sofern Sie dies im Vorfeld wünschen. Unter dem Punkt „Zufallsbefund“ finden Sie für jede Untersuchung beschrieben, inwieweit dies möglich ist.

#### **24- Stunden Ein-Kanal-EKG**

Am Labortag 1 (siehe Seite 2) erhalten Sie von uns im Institut für Medizinische Psychologie einen Brustgurt, wie er auch im Sportbereich eingesetzt wird, den Sie direkt anlegen und für ca. 24 Stunden tragen. Die unkomplizierte Handhabung wird Ihnen vor Ort erklärt. Dieser Gurt schränkt den Alltag, den Sie so fortführen sollten wie immer, kaum ein. Die Auswertung erfolgt nach der Gurtrückgabe im Institut für Medizinische Psychologie.

**Warum?** Die Langzeitmessung der Herzfrequenz („Puls“) über 24 Stunden gibt uns Auskunft über Erholung und Entspannung. So können wir die Balance zwischen Belastung und Ruhe der biologischen Systeme Ihres Körpers untersuchen.

**Mögliche Zufallsbefunde** können hierbei nur in geringem Ausmaß festgestellt werden, da wir keine Auswertung des EKGs, sondern allein die Abstände der Herzschläge, also die Herzfrequenz (Schläge des Herzens pro Minute) auswerten. D.h. einzig eine im Durchschnitt dauerhaft deutlich erhöhte Herzfrequenz würden wir Ihnen mitteilen, sofern Sie dies wünschen.

#### **Speichelproben**

Am Labortag 2 werden wir Sie bitten, 20 Min. vor, direkt vor, direkt nach, und 20-30 Min. nach der positiven sozialen Interaktion eine geringe Menge Speichel abzugeben (pro Entnahme ca. 1 ml, insgesamt 4 mal). Für diese Speichelproben stellen wir Ihnen nummerierte und sortierte, einfach zu handhabende Speichelnährchen zur Verfügung und erklären die Benutzung vor Ort.

**Warum?** Psychische Belastung führt zu einer gesteigerten Aktivierung der beiden Hauptstresssysteme im Körper, dem sympathischen Nervensystem (SNS) und der Hypothalamus-Hypophysen-Nebennierenrindennachse (HHNA). Aus 4 Speichelproben pro Proband erheben wir den Verlauf der Parameter dieser Stresssysteme: **Cortisol** (HHNA), **Alpha Amylase** (indirekt SNS) und **Immunparameter Interleukin IL-1 $\beta$**  und **IL-6** (indirekt mit Stress verbunden).

#### **Mögliche Zufallsbefunde:**

Interleukine (IL1- $\beta$  und IL6 aus Speichel): Keine bekannt.

Alpha-Amylase: Keine bekannt.





Speichel-Cortisol: Dauerhaft erhöhtes Cortisol im Speichel kann auf ein Cushing-Syndrom bzw. Morbus Cushing hindeuten.

### Blutproben

An Labortag 1 werden wir Ihnen mit Ihrer Erlaubnis insgesamt ca. 25ml Blut abnehmen (das entspricht etwas mehr als 2 Esslöffeln). Für die Blutentnahme ist es nicht erforderlich, dass Sie nüchtern sind.

**Warum?** Bei Stressreaktionen wird im Gehirn Serotonin freigesetzt. Dies kann jedoch nicht direkt gemessen werden. Wir erfassen die Einflüsse des Stresses auf das Gehirn deshalb indirekt über die Aktivierung des **Serotonin-Transporter-Gens (SLC6A4)**, welches im Blut nachgewiesen werden kann. Zusätzlich untersuchen wir die **genetische Aktivierung des Oxytocinrezeptors (OXTR)**, der mit Stresserleben und Bindungsverhalten in Zusammenhang steht. Beides wird über sogenannte „epigenetische“ Untersuchungen bestimmt. Hierbei wird explizit **nicht** ihr Genom entschlüsselt, sondern gemessen, in wie weit die zwei oben genannten Bereiche des Erbguts von den Körperzellen *abgelesen* werden. Folglich können auch keine Erbkrankheiten o.ä. aufgedeckt werden.

Ebenfalls werden **CRP** (C-reaktives Protein; indirekt mit Stress verbunden) und nochmals Interleukin **IL1- $\beta$  und IL-6** im Blut gemessen. Dies ist das etablierte Verfahren zur Bestimmung der Parameter bei Stress. Mit Hilfe der zusätzlichen, oben beschriebenen Bestimmung der Interleukine im Speichel möchten wir prüfen, ob sich die Blut- und Speichelwerte im Verlauf ähnlich verhalten (steigen und fallen gemeinsam), so dass direkte Schlüsse von Speichel-Interleukine auf Blut-Interleukine gezogen werden können. Falls dies der Fall wäre, könnte bei zukünftigen Untersuchungen (z.B. wissenschaftlichen Studien zum Thema Depression) bei mehrfach nachgewiesenem Zusammenhang auf eine Blutentnahme verzichtet werden. Eine Speichelentnahme würde dann ausreichen.

### Mögliche Zufallsbefunde:

Entzündungsmarker IL-1 $\beta$ , IL-6, CRP: Erhöhte Werte deuten auf eine mögliche akute oder chronische Entzündung hin. Bei Diabetes Mellitus sind auch ohne zusätzlichen psychischen Stress CRP, IL1- $\beta$  und IL-6 erhöht. Aus diesem Grund wird zum Ausschluss eines unbekanntes Diabetes Mellitus **HbA1c**, ein Langzeitmarker des Blutzuckers, bestimmt.

HbA1c: Leicht erhöhte Werte deuten auf einen Prä-Diabetes, erhöhte Werte deuten auf einen Diabetes Mellitus Typ II hin.

Epigenetische Marker (SLC6A4; OXTR): Keine bekannt.

Hinweis: Es wird kein umfassendes Blutbild erstellt. Das heißt, diese zu Forschungszwecken durchgeführte Untersuchung ersetzt nicht eine Blutentnahme bei einem Arzt.

Speicheluntersuchung und Herzfrequenzprofilauswertung sowie die Bestimmung das Interleukin 1 $\beta$  im Blut erfolgen im Institut für Medizinische Psychologie. CRP, HbA1c und Interleukin 6 werden im Zentrallabor des Klinikums bestimmt. Am ZI



Mannheim wird die epigenetische Auswertung von SLC6A4 und OXTR-Gen durchgeführt.

### **Eye Tracking und Videoaufzeichnung**

Beides findet am Labortag 2 während der zehnminütigen positiven sozialen Interaktion statt. Für diese Aufnahmen stehen entsprechende Geräte zur Erfassung der Blickbewegung, sogenannte Eye-Tracker, auf einem Tisch zwischen Ihnen und Ihrem Partner. Außerdem zeichnen zwei Kameras den Kopf und Oberkörper des jeweiligen Gegenübers auf (sogenannte Szenenkameras), ohne die das Eye-Tracking nicht funktionieren würde. Es kommen **keine** Geräte zum Einsatz, die am Kopf o.ä. getragen werden. Sollten Sie eine Brille oder Kontaktlinsen tragen, bitten wir Sie, diese zur Untersuchung mitzubringen. Sollten Sie beides besitzen, bringen Sie bitte Ihre Kontaktlinsen mit, da diese beim Eye-Tracking leichter auszuwertende Ergebnisse liefern.

**Warum?** Der Eye-Tracker ist ein Gerät, das aufzeichnet wohin Sie blicken. In mehreren Studien wurde bereits gezeigt, dass depressiv erkrankte Menschen im Vergleich zu nicht depressiv erkrankten Menschen ein verändertes Blickverhalten aufweisen. Bis jetzt wurde dies jedoch noch nie in einer echten Gesprächssituation zweier Partner systematisch untersucht.

Wir erhoffen uns hieraus neue Erkenntnisse zu erlangen zum Beispiel zur Veränderung der Aufmerksamkeitslenkung. Die Aufnahmen der Szenenkameras erlauben außerdem eine Untersuchung der Kommunikationsmuster. Unser Ziel ist es, Unterschiede im Blickverhalten aufdecken zu können.

**Zufallsbefunde:** Keine bekannt.

## **6. Was ist das CBC-Training?**

Wenn Sie am CBC-Training teilnehmen, werden Sie Methoden erlernen, die sich auf ein positives Miteinander in der Partnerschaft beziehen. Als nicht-religiöse (säkulare) Methode bietet das Training verschiedene Wege an, Mitgefühl gegenüber einem umfassenden Kreis an Menschen zu kultivieren und auszudehnen. Im Vordergrund stehen hier jedoch der Partner und die partnerschaftliche Beziehung.

Die darin beinhalteten Praktiken unterstützen die Entwicklung einer Vielzahl von positiven Qualitäten, Erfahrungen und Verhaltensweisen, wie z.B. Freundlichkeit, Dankbarkeit, als auch Empathie und Mitgefühl. Die fundamentale Grundannahme ist, dass Mitgefühl als eine Persönlichkeitseigenschaft entwickelt und erweitert werden kann. Diese Annahme wird durch aktuelle Forschungsergebnisse unterstützt.

Dieses CBC-Training kombiniert gedankliche Komponenten und Übungen (u.a. Istzustandsanalyse, Achtsamkeits- und Mitgefühlsmeditationen) und solche, die die Partnerschaft und das soziale Miteinander betreffen (z.B. Empathietraining). In standardisierten Labortests wurde bereits gezeigt, dass ein solches Training die psychische und körperliche Stress- und Immunantwort bei gesunden Individuen verbessert. Ob sich das Training auch bei Menschen mit Depressionen entspre-



chend positiv auswirkt, und ob es einen positiven Einfluss auf die partnerschaftliche Interaktion hat, ist bisher noch nicht erforscht.

Die Teilnahme an einem CBC-Training über 10 Wochen würde nach aktuellem Stand etwa 300€ pro Person kosten. Für Sie und Ihren Partner ist bei entsprechender Zufallslosung dieses Training jedoch komplett **kostenfrei**. Für die Teilnahme ist eine ärztliche Überweisung an unsere Institutsambulanz notwendig.

## 7. Datenschutz und Aufbewahrung

Die von Ihnen zur Verfügung gestellten Daten und Biomaterialien werden ausschließlich für die wissenschaftliche Forschung verwendet und streng vertraulich behandelt. Ihnen wird bei der ersten Registrierung als Studienteilnehmer eine pseudonymisierte, verschlüsselte Identifikationsnummer (ID-Nummer, aufsteigend) zugeordnet. Dies ist ein Code, der auf Ihren ausgefüllten Fragebögen, Speichelproben etc. steht und keinerlei Informationen über Sie als Person beinhaltet. Alle Materialien, die gesammelt werden, werden mit dieser Nummer versehen. Nur die in Papierform vorliegende Einwilligungserklärung wird sowohl den Namen, als auch diese ID-Nummer enthalten und separat von allen Daten 2-fach verschlossen aufbewahrt werden. Es werden keine Daten mit dem Namen, sondern nur mit Ihrer ID-Nummer analysiert und es gibt außer über die Einwilligungserklärung keinen Weg, den Namen mit der ID-Nummer zu verbinden. Alle psychologischen und körperlichen Daten werden ausschließlich über ID-Nummern kenntlich gemacht. Keine Publikation dieses Projekts wird Ihren Namen preisgeben. Darüber hinaus werden die Ergebnisse sämtlicher Datenanalysen getrennt von Ihren personenbezogenen Daten gespeichert und können nicht ohne Mitwirkung der Projekt- oder Studienleitung Ihrer Person zugeordnet werden.

Diese Studie wird überwiegend aus öffentlichen Mitteln (z.B. der Deutschen Forschungsgemeinschaft DFG) finanziert. In Zukunft ergeben sich möglicherweise neue wissenschaftliche Fragestellungen, die im Rahmen des oben genannten Forschungsbereiches mithilfe der bereits erhobenen Daten oder Biomaterialien beantwortet werden können. Eine Veröffentlichung der Daten kann folglich bei der Beantwortung dieser neuen Fragestellungen helfen, wodurch vergleichbare Daten nicht nochmals erhoben werden müssten und öffentliche Mittel dadurch effizienter genutzt werden könnten.

Die erhobenen Daten werden dazu nach Beendigung der Studie der nationalen und internationalen Wissenschaft in anonymisierter Form durch eine Veröffentlichung über das Forschungsdatenrepositorium der Universität Heidelberg „heiDATA“ zugänglich gemacht. Dies dient zusätzlich der wissenschaftlichen Qualitätssicherung im Sinne der Nachvollziehbarkeit der erbrachten Studienergebnisse. Eine Aufbewahrung der Daten bei heiDATA erfolgt **ohne** persönliche Identifikatoren (z.B. Name oder Kontaktdaten).



Die auf diese Weise veröffentlichten Daten sowie auch Veröffentlichungen in wissenschaftlichen Fachartikeln, welche die Daten in anonymisierter Form verwenden, bleiben dauerhaft öffentlich verfügbar.

Die Daten, Biomaterialien und ausgefüllten Fragebögen werden Eigentum des Instituts für Medizinische Psychologie des Universitätsklinikums Heidelberg. Die Speichel- und Blutproben werden dort aufbewahrt, oder mit Ihrer ID-Nummer verschlüsselt auch an andere Labore verschickt, welche mit diesen Proben Analysen durchführen. Ein Teil der Blutproben wird vom Zentralinstitut für Seelische Gesundheit (Abteilung Genetische Epidemiologie in der Psychiatrie des Zentralinstituts für Seelische Gesundheit) in Mannheim aufbewahrt, das Ihre Blutproben mit einer anderen, separat erzeugten ID-Nummer verschlüsselt zur Analyse des genetischen Materials erhält. Alle in dieser Studie erhobenen Biomaterialien werden befristet auf maximal 10 Jahre nach Beendigung der Studie aufbewahrt. Falls in Zukunft eine wesentlich veränderte wissenschaftliche Fragestellung mithilfe Ihrer Probe untersucht werden soll, wird zuvor eine Stellungnahme der zuständigen Ethikkommission eingeholt.

## 8. Risiken und Nutzen der Teilnahme

### Risiken:

Mit dem Erheben der Fragebogendaten, der Videoaufnahmen, der Aufnahmen der Blickbewegungen, der Langzeitmessungen des Pulses und der Entnahme der Speichelproben sind keinerlei Risiken verbunden.

Mit den Blutentnahmen bestehen die Risiken, die mit einer normalen Blutentnahme verbunden sind. Die Entnahme einer Blutprobe ist in der Regel nur mit einem sehr geringen Risiko verbunden. An der Einstichstelle kann es zu leichten Schmerzen kommen oder es kann ein Bluterguss (blauer Fleck) entstehen, der evtl. einige Tage sichtbar ist. In äußerst seltenen Fällen kann auch die Bildung eines Blutgerinnsels (Thrombose), eine örtlich begrenzte Entzündung oder eine Infektion an der Einstichstelle auftreten oder es kann zu dauerhaften Schädigungen von Blutgefäßen oder Nerven kommen. Die Blutentnahmen werden von einem dazu befähigten und qualifizierten Fachpersonal (i.d.R. Arzt) durchgeführt.

Die Zuordnung zu Behandlungs- bzw. Kontrollgruppe erfolgt über ein Zufallsverfahren (sog. Randomisierung), worauf wir keinen Einfluss haben. Diejenigen, die der Kontrollgruppe zugeordnet werden, erhalten von unserer Seite zunächst keine Intervention. Die übliche Wartezeit auf einen individuellen Psychotherapieplatz für die an Depression Erkrankten kann durch eine reguläre allgemeinärztliche bzw. pharmakologische antidepressive Behandlung aufgenommen bzw. weitergeführt werden.

Für diejenigen Paare, die an dem CBC-Training teilnehmen, sind keine besonderen Risiken zu erwarten. Bisher sind keine unerwünschten Wirkungen in Verbindung mit dem CBC-Training wissenschaftlich erfasst worden. Es sind keine körperlichen



oder psychischen Gefahren zu erwarten. Durch die potenziell emotionalen Erfahrungen während der Trainingssitzungen kann es zu psychischen Reaktionen kommen, z.B. Stimmungsschwankungen. Diese Reaktionen werden in den Sitzungen jedoch berücksichtigt und als wichtige Erlebnisse in das Geschehen des Gruppentrainings einbezogen. Alle Gruppentrainings werden von Psychologen bzw. Psychotherapeuten und zusätzlich in CBCT qualifizierten Trainern durchgeführt, sowie begleitend von erfahrenen Psychotherapeuten supervidiert.

#### **Nutzen:**

Das hier durchgeführte Forschungsvorhaben zielt auf eine Verbesserung unseres Verständnisses für die Entstehung depressiver Störungen sowie deren Therapie durch psychologische Interventionen ab.

Für diejenigen, die an einem für Sie kostenlosen CBC-Training teilnehmen werden, liegt der persönliche Nutzen darin, dass Sie Veränderungsimpulse im Umgang mit und zur Bewältigung der depressiven Störung und vor allem des partnerschaftlichen Umgangs miteinander erhalten können. Beispielsweise könnten Sie im Verlauf des Trainings erleben, wie Sie mit einem positiveren Blick oder Gefühl Ihrem Partner begegnen können. Sie können Impulse für neue Verhaltensweisen erhalten und erfahren, wie es sich anfühlt, wenn Sie eine alternative Haltung zu Ihren Problemen einnehmen.

Nach Ende der Studie werden Ihnen die Gesamtergebnisse der Studie mitgeteilt. Für Ihre vollständige Teilnahme an der Studie erhält **jedes Paar** insgesamt eine Aufwandsentschädigung in Höhe von **200€, also 50€ pro Person pro Messzeitpunkt**, unbar auf ein anzugebendes Konto.

Nach vollständiger Studienteilnahme haben Sie die Möglichkeit als Dankeschön an dem gruppenbasierten Mitgefühlstraining für Paare (CBC-Training) teilzunehmen. Die Kosten hierfür werden vom Institut übernommen (circa 300€ pro Person).

### **9. Freiwilligkeit der Teilnahme**

Die Erhebung, Verarbeitung und Nutzung der Daten im Rahmen des Projektes erfolgt auf Basis der Rechtsgrundlage der freiwilligen und informierten Einwilligung der Teilnehmer (gemäß §§ 4, 4a BDSG). Sie nehmen an dieser Studie freiwillig teil. Sie können Ihre Teilnahme jederzeit auch ohne Angabe von Gründen abbrechen; dies hat keinerlei negative Konsequenzen für Ihre Kursteilnahme oder Ihre Gesundheitsversorgung. Die Zuteilung zur Trainings- oder Kontrollgruppe erfolgt über eine Zufallsauswahl, so dass wir an dieser Stelle keine persönlichen Präferenzen berücksichtigen können.

Die Untersuchungen werden nur dann durchgeführt, wenn Sie dazu freiwillig und schriftlich Ihre Einwilligung erklären.



## 10. Widerrufsrecht

Sie können Ihre Einwilligung zur Verwendung Ihrer Daten und Biomaterialien jederzeit ohne Angabe von Gründen und ohne nachteilige Folgen für Sie widerrufen. Im Falle eines Widerrufs können Sie entscheiden, ob Ihre Biomaterialien vernichtet und die dazu gehörenden Daten gelöscht werden sollen oder ob Sie in anonymisierter Form für weitere Forschungsvorhaben verwendet werden dürfen. Dies gilt auch dann, wenn die verschlüsselten Daten und Blutproben zur wissenschaftlichen Analyse verschlüsselt an das ZI Mannheim weitergegeben wurden. Bereits erhobene Daten verbleiben auch nach Vernichtung des Biomaterials bzw. des Fragebogens in der Studie, soweit der Personenbezug nicht mehr besteht.

### Wenden Sie sich für einen Widerruf bitte an die zuständige Studienleitung:

Prof. Dr. phil. Dipl.- Psych. Beate Ditzen  
Institut für Medizinische Psychologie im  
Zentrum für Psychosoziale Medizin (ZPM)  
Universitätsklinikum Heidelberg  
Bergheimer Str. 20, D-69115 Heidelberg  
Tel.: +49 6221 56 8150  
E-Mail: beate.ditzen@med.uni-heidelberg.de

## 11. Erneute Kontaktaufnahme

Es besteht die Möglichkeit der Kontaktaufnahme durch die Studienleitung, wenn die Ihnen entnommenen Biomaterialien wider Erwarten Informationen enthalten, die für die Erhaltung oder Wiederherstellung Ihrer Gesundheit von erheblicher Bedeutung sind. Die Kontaktaufnahme wird durch die Studienleitung oder durch eine durch die Studienleitung beauftragte Person telefonisch, schriftlich oder per E-Mail erfolgen.

## 12. Versicherungsschutz

Für die Planung und Durchführung der Studie besteht ein Versicherungsschutz für Probanden im Rahmen der Betriebs-Haftpflichtversicherung des Universitätsklinikums Heidelberg. Der Versicherungsschutz erstreckt sich auf die gesetzliche Haftpflicht des Universitätsklinikums sowie auf die persönliche gesetzliche Haftpflicht aller im dienstlichen Auftrag für das Universitätsklinikum an der Studie mitwirkenden Mitarbeiter (Studienleiter, sonstiges Personal), beispielsweise für Schäden durch die Entnahme von Blutproben (Betriebs-/Umwelt-Haftpflicht-, Umweltschadens-Versicherung: Nr. 39327978 01116. Versicherer: HDI-Gerling Industrie Versicherung AG, HDI-Platz 1, 30659 Hannover, Telefon: +49 511 645-0, Telefax: +49 511 645-4545, E-Mail: info@hdi-gerling.de).



### 13. Weitere Informationen

Sollten Sie noch weitere Fragen haben, wenden Sie sich bitte an Ihre Studienleitung (die entsprechenden Kontaktinformationen finden Sie auf Seite 1 dieser Informationsschrift). Stellen Sie alle Fragen, die Ihnen wichtig erscheinen und lassen Sie sich ausreichend Zeit für Ihre Entscheidung zur Teilnahme an dieser wissenschaftlichen Untersuchung.

Mit freundlichen Grüßen

Dr. Corina Aguilar-Raab und Dr. Marc Jarczok  
(Projektleitung)

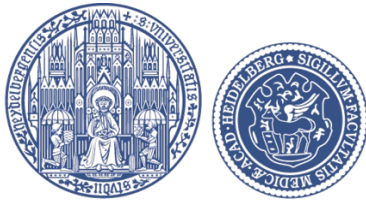

UniversitätsKlinikum Heidelberg

Institut für Medizinische Psychologie | Bergheimer Str. 20 | 69115 Heidelberg

## Informationsschrift für Männer in Partnerschaft mit an Depression erkrankter Partnerin zur Studie: „Psychobiologische Marker und reales Interaktionsverhalten bei Depression: CBCT-Studie“

Version 3.0

Sehr geehrter Studienteilnehmer,

herzlichen Dank für Ihr Interesse an unserer Studie mit dem Titel „*Psychobiologische Marker und reales Interaktionsverhalten: CBCT-Studie*“. Wir möchten Sie mit diesem Informationsschreiben über unsere Studie umfassend informieren.

### 1. Unsere Studie: Worum geht es und warum ist sie wichtig?

Die Depression gehört zu den am weitesten verbreiteten psychischen Störungen weltweit. Nach wie vor sind die Ursachen für eine Depression ungeklärt und wir forschen intensiv zu möglichen Behandlungsansätzen. Nachgewiesen sind bei der Depression Veränderungen von Aufmerksamkeits-, Wahrnehmungs- und Denkprozessen. Diese könnten daran beteiligt sein, dass sich Erkrankte zurückziehen und Gefühle der Unverbundenheit und Einsamkeit auftreten. Ein relativ neuer Therapieansatz bei Depressionen sind Trainings, die auf Achtsamkeit und Mitgefühl fokussieren. Da bei einer Depression häufig zentrale soziale Beziehungen wie zum Beispiel Partnerschaft oder Ehe beeinträchtigt sein können, berichten oft auch die Partner von psychischen Belastungen (z.B. Stress). Somit könnte diese neue Interventionsform zentrale soziale Beziehungen und die eigene Partnerschaft verbessern, sowie gesundheitsförderliche Effekte durch ein verringertes Stresserleben für beide Partner entfalten.

Im Rahmen dieser Studie möchten wir in einem ersten Teil deshalb überprüfen, **welche Unterschiede** es konkret zwischen Paaren mit und ohne an Depression erkrankter Partnerin gibt.

Hierbei untersuchen wir ein kurzes, angeleitetes **positives Partnerschaftsgespräch**, wozu wir Paare zu uns ins Institut für Medizinische Psychologie einladen. Wir sind an **Verhaltensbeobachtung**, aber auch an verschiedenen **Reaktionen auf körperlicher Ebene** (z.B. Ausmaß an vorhandenen Stresshormonen), die eine psychische Belastung „messbar“ machen, interessiert.

In einem zweiten Teil geht es darum, ob ein Achtsamkeits- und Mitgefühlsbasiertes Gruppentraining für Paare (sog. CBC-Training entwickelt an der Emory Universität in Atlanta, USA): aus dem Englischen = „Cognitively-Based Compassion Training“ –

### Zentrum für Psychosoziale Medizin

Klinik für Allgemeine Psychiatrie mit Poliklinik

Prof. Dr. Sabine Herpertz

Klinik für Psychosomatische u. Allgemeine Klinische Medizin

Prof. Dr. W. Herzog

Klinik für Kinder- u. Jugendpsychiatrie

Prof. Dr. F. Resch

Institut für Medizinische Psychologie

Prof. Dr. B. Ditzen

Institut für Psychosoziale Prävention

Prof. Dr. phil. Svenja Taubner

### Forschungsteam:

Prof. Dr. Beate Ditzen

Direktorin des Instituts für Medizinische Psychologie

### Projektleitung:

Dr. Corina Aguilar-Raab, Dipl.-Psych.

[Corina.Aguilar-Raab@med.uni-heidelberg.de](mailto:Corina.Aguilar-Raab@med.uni-heidelberg.de)

Dr. Marc N. Jarczok, Dipl. SoWi

[marc.jarczok@med.uni-heidelberg.de](mailto:marc.jarczok@med.uni-heidelberg.de)

Institut für Medizinische Psychologie im Zentrum für Psychosoziale Medizin des UniversitätsKlinikums Heidelberg

Bergheimer Straße 20  
D-69115 Heidelberg

Tel.: Dr. Aguilar-Raab & Dr. Jarczok  
06221/568135





kognitiv-basiertes Mitgefühlstraining) die Belastung des Partners und die Symptome der Depression vermindert sowie die Partnerschaftsqualität sowie mögliche negative Auswirkungen der Depression auf die eigene körperliche Gesundheit (beispielsweise Stressreaktion) reduziert. Hierbei werden die teilnehmenden Paare per Zufallsprinzip zwei Gruppen zugeordnet: bei der einen Hälfte erfolgt das eben beschriebene CBC-Training, bei der anderen Hälfte nicht – diese Gruppe dient als Kontroll- bzw. Vergleichsgruppe.

Die zufällige Zuteilung (sogenannte Randomisierung) ist eines der wesentlichen Verfahren zur Sicherstellung der Verallgemeinerbarkeit der Studienergebnisse, daher kann die einmal getroffene Zuteilung von der Studienleitung nicht beeinflusst werden. Die Wahrscheinlichkeit, dass Sie in die CBC-Trainingsgruppe kommen liegt bei 50 Prozent.

## 2. Welche Daten werden in der Studie erfasst?

In dieser Studie werden Selbstberichtsdaten (erfasst über Fragebögen) und körperliche/biologische Daten („Echtzeit-Blickbewegung/Eye-Tracking“, „Stress-Hormone“, „Stress-Enzyme“, „Stress-Physiologie“, „Immun-Parameter“, „24h Puls“ und „genetische Marker“) erhoben. Die körperlichen Daten werden hierbei zusammenfassend als **Biomaterial** bezeichnet.

## 3. Wie oft werden diese Daten erhoben?

Die unten beschriebene Datenerhebung erfolgt zwei Mal und in allen Gruppen: Sowohl bei der Gruppe, die das CBC-Training erhält, als auch bei der Gruppe ohne Training: Das erste Mal vor Beginn des Trainings und das zweite Mal nach 10 Wochen, bzw. nach Abschluss des Trainings. Circa 4 und 8 Wochen nach der zweiten Datenerhebung erfolgt eine online Fragebogenbefragung, die Sie von zuhause aus durchführen können.

## 4. Welcher Zeitaufwand geht hiermit einher?

Der Zeitaufwand gliedert sich wie folgt:

1. Telefonischer Erstkontakt (5-15 Min.) (bereits erfolgt).
2. Sie erhalten eine weitere Einladung in das Institut für Medizinische Psychologie. Im Rahmen des Labortag 1 findet ein vorbereitendes Gespräch, eine Screening-Erhebung und ein diagnostisches Interview sowie die Blutabnahme statt (heutiger Termin). Danach erhalten Sie und Ihre Partnerin einen Brustgurt der Ihren Puls für ca. 24 Stunden im Alltag misst. Mit diesem werden Sie nach Hause entlassen (ca. 2,5 Stunden).



3. Wir bitten Sie, zuhause einige Fragebögen auszufüllen, die wir Ihnen nach dem 1. Tag mitgeben (ca. 30 Minuten).
  
4. Labortag 2 am Institut für Medizinische Psychologie (zw. 15 und 20 Uhr): Nach einer kurzen Vorbereitung erfolgt eine angeleitete 10-minütige positive soziale Interaktion mit Ihrer Partnerin. Während dieser Interaktion werden Ihre Blickbewegungen und weiterhin der Puls (Brustgurt) gemessen. Vor und nach der Interaktion werden insgesamt 4 Speichelproben entnommen (siehe Punkt 6 für genauere Angaben: „**Wie werden die Reaktionen auf körperliche Ebene gemessen und warum? - Messungen der Blickbewegungen und des Pulses sowie die Entnahme von Biomaterialien Blut- und Speichelproben**“). Danach füllen Sie und Ihre Partnerin verschiedene Fragebögen aus. Im Anschluss werden Sie und Ihre Partnerin zu einem abschließendes Paargespräch gebeten. Die Gesamtdauer beträgt insgesamt ca. 160 Minuten.

Für diejenigen Paare, die auch an dem CBC-Training teilnehmen, erfolgen einmal wöchentliche, zweistündige Gruppen-Sitzungen, die ebenfalls zur Qualitätssicherung per Video aufgenommen werden. Am Ende jeder Sitzung erfolgt eine kurze Fragebogenbefragung (5 Min.). In den zehn Wochen des CBC-Trainings werden Übungen und teilweise Hausaufgabe bzw. Partnerübungen aufgegeben (jeweils 8-12 Min.). Sie werden vier Mal pro Woche morgens per Kurznachricht (sog. SMS) über Ihr Smartphone daran erinnert, und zu Ihrer Übung und Ihrer Befindlichkeit befragt. In der SMS befindet sich dazu ein Link. Wenn Sie auf diesen Link klicken, gelangen Sie zu einer kurzen, internetbasierten Abfrage, welche die Dauer und Intensität sowie ihr aktuelles Befinden erfragt (1-3 Min.). Das Beantworten dieser Fragen können Sie überall dort umsetzen, wo Sie ein internetfähiges Gerät nutzen können (z.B. Ihr Smartphone, Ihren Laptop, Ihr Tablet-PC etc.).

Die Paare, die nicht am CBC-Training teilnehmen, werden nur einmal wöchentlich per SMS zu ihrer aktuellen Befindlichkeit befragt (5 Min.). Die Termine der einzelnen Untersuchungsschritte und des CBC-Trainings werden mit Ihnen einzeln abgestimmt – hierzu werden wir Sie zeitnah persönlich kontaktieren. Bei Rückfragen können Sie sich jederzeit an die Projektleiter (Dr. Corina Aguilar-Raab, Dr. Marc N. Jarczok) wenden. Die entsprechenden Kontaktinformationen der Projektleitung entnehmen Sie bitte der ersten Seite dieser Informationsschrift.

#### 5. **Wie werden die Reaktionen auf körperliche Ebene gemessen und warum? - Messungen der Blickbewegungen und des Pulses sowie Entnahme von Biomaterialien Blut- und Speichelproben -**

Der Nachweis biologischer Marker ist wichtig, da hierdurch deutlich wird, in welchem Maße Ihr Körper während einer positiven Interaktion mit Ihrer Partnerin unter Stress steht. Diese normale, körperliche Reaktion kann vom persönlichen



Belastungsempfinden deutlich abweichen. Die akute Aktivierung der biologischen Stresssysteme ist eine normale Reaktion und birgt keinerlei Gefahren für Ihre Gesundheit.

Sie und Ihre Partnerin liefern uns durch Ihre Mitarbeit dabei wichtige Daten, um ein eventuell verändertes Verhalten zwischen Ihnen beiden im Vergleich zu weniger psychisch belasteten Paaren zu erkennen. Des Weiteren werden die Werte Ihrer Biomarker vor und nach 10 Wochen bzw. nach dem CBC-Training verglichen, womit das Potential des Trainings zur objektiven Verbesserung partnerschaftlicher Interaktion und ihrer individuellen psychischen Belastung gemessen wird.

Mögliche pathologische Zufallsbefunde, also Ergebnisse der Untersuchungen die für Sie gesundheitlich von erheblicher Bedeutung sind und/oder einer weiteren Untersuchung bedürfen, teilt Ihnen die Studienleitung direkt nach der Auswertung mit, sofern Sie dies im Vorfeld wünschen. Unter dem Punkt „Zufallsbefund“ finden Sie für jede Untersuchung beschrieben, inwieweit dies möglich ist.

#### **24- Stunden Ein-Kanal-EKG**

Am Labortag 1 (siehe Seite 2) erhalten Sie von uns im Institut für Medizinische Psychologie einen Brustgurt, wie er auch im Sportbereich eingesetzt wird, den Sie direkt anlegen und für ca. 24 Stunden tragen. Die unkomplizierte Handhabung wird Ihnen vor Ort erklärt. Dieser Gurt schränkt den Alltag kaum ein, den Sie so fortführen sollten wie immer. Die Auswertung erfolgt nach der Gurtrückgabe im Institut für Medizinische Psychologie.

**Warum?** Die Langzeitmessung der Herzfrequenz („Puls“) über 24 Stunden gibt uns Auskunft über Erholung und Entspannung. So können wir die Balance zwischen Belastung und Ruhe der biologischen Systeme Ihres Körpers untersuchen.

**Mögliche Zufallsbefunde** können hierbei nur in geringem Ausmaß festgestellt werden, da wir keine Auswertung des EKGs, sondern allein die Abstände der Herzschläge, also die Herzfrequenz (Schläge des Herzens pro Minute) auswerten. D.h. einzig eine im Durchschnitt dauerhaft deutlich erhöhte Herzfrequenz, würden wir Ihnen mitteilen, sofern Sie dies wünschen.

#### **Speichelproben**

Am Labortag 2 werden wir Sie bitten, 20 Min. vor, direkt vor, direkt nach, und 20-30 Min. nach der positiven sozialen Interaktion eine geringe Menge Speichel abzugeben (pro Entnahme ca. 1 ml, insgesamt 4 mal). Für diese Speichelproben stellen wir Ihnen nummerierte und sortierte, einfach zu handhabende Speichelröhrchen zur Verfügung und erklären die Benutzung vor Ort.

**Warum?** Psychische Belastung führt zu einer gesteigerten Aktivierung der beiden Hauptstresssysteme im Körper, dem sympathischen Nervensystem (SNS) und der Hypothalamus-Hypophysen-Nebennierenrindennachse (HHNA). Aus 4 Speichelproben pro Proband erheben wir den Verlauf der Parameter dieser Stresssysteme: **Cortisol** (HHNA), **Alpha Amylase** (indirekt SNS) und **Immunparameter Interleukin IL-1 $\beta$**  und **IL-6** (indirekt mit Stress verbunden).

**Mögliche Zufallsbefunde:**



Interleukine (IL1- $\beta$  und IL6 aus Speichel): Keine bekannt.

Alpha-Amylase: Keine bekannt.

Speichel-Cortisol: Dauerhaft erhöhtes Cortisol im Speichel kann auf ein Cushing-Syndrom bzw. Morbus Cushing hindeuten.

### Blutproben

An Labortag 1 werden wir Ihnen mit Ihrer Erlaubnis insgesamt ca. 25 ml Blut abnehmen (das entspricht etwas mehr als 2 Esslöffeln). Für die Blutentnahme ist es nicht erforderlich, dass Sie nüchtern sind. **Warum?** Bei Stressreaktionen wird im Gehirn Serotonin freigesetzt. Dies kann jedoch nicht direkt gemessen werden. Wir erfassen die Einflüsse des Stresses auf das Gehirn deshalb indirekt über die Aktivierung des **Serotonin-Transporter-Gens (SLC6A4)**, welches im Blut nachgewiesen werden kann. Zusätzlich untersuchen wir die **genetische Aktivierung des Oxytocinrezeptors (OXTR)**, der mit Stresserleben und Bindungsverhalten in Zusammenhang steht. Beides wird über sogenannte „epigenetische“ Untersuchungen bestimmt. Hierbei wird explizit **nicht** ihr Genom entschlüsselt, sondern gemessen, in wie weit die zwei oben genannten Bereiche des Erbguts von den Körperzellen *abgelesen* werden. Folglich können auch keine Erbkrankheiten o.ä. aufgedeckt werden.

Ebenfalls werden **CRP** (C-reaktives Protein; indirekt mit Stress verbunden) und nochmals Interleukin **IL1-  $\beta$  und IL-6** im Blut gemessen. Dies ist das etablierte Verfahren zur Bestimmung der Parameter bei Stress. Mit Hilfe der zusätzlichen, oben beschriebenen Bestimmung der Interleukine im Speichel möchten wir prüfen, ob sich die Blut- und Speichelwerte im Verlauf ähnlich verhalten (steigen und fallen gemeinsam), so dass direkte Schlüsse von Speichel-Interleukine auf Blut-Interleukine gezogen werden können. Falls dies der Fall wäre, könnte bei zukünftigen Untersuchungen (z.B. wissenschaftlichen Studien zum Thema Depression) bei mehrfach nachgewiesenem Zusammenhang auf eine Blutentnahme verzichtet werden. Eine Speichelentnahme würde dann ausreichen.

### Mögliche Zufallsbefunde:

Entzündungsmarker IL-1 $\beta$ , IL-6, CRP: Erhöhte Werte deuten auf eine mögliche akute oder chronische Entzündung hin. Bei Diabetes Mellitus sind auch ohne zusätzlichen psychischen Stress CRP, IL1-  $\beta$  und IL-6 erhöht. Aus diesem Grund wird zum Ausschluss eines unbekanntes Diabetes Mellitus **HbA1c**, ein Langzeitmarker des Blutzuckers, bestimmt.

HbA1c: Leicht erhöhte Werte deuten auf einen Prä-Diabetes, erhöhte Werte deuten auf einen Diabetes Mellitus Typ II hin.

Epigenetische Marker (SLC6A4; OXTR): Keine bekannt.

Hinweis: Es wird kein umfassendes Blutbild erstellt. Das heißt, diese zu Forschungszwecken durchgeführte Untersuchung ersetzt nicht eine Blutentnahme bei einem Arzt.

Speicheluntersuchung und Herzfrequenzprofilauswertung sowie die Bestimmung des Interleukin 1 $\beta$  im Blut erfolgen im Institut für Medizinische Psychologie. CRP,



HbA1c und Interleukin 6 werden im Zentrallabor des Klinikums bestimmt. Am ZI Mannheim wird die epigenetische Auswertung von SLC6A4 und OXTR-Gen durchgeführt.

### **Eye Tracking und Videoaufzeichnung**

Beides findet am Labortag 2 während der zehnminütigen positiven sozialen Interaktion statt. Für diese Aufnahmen stehen entsprechende Geräte zur Erfassung der Blickbewegung, so genannte Eye-Tracker, auf einem Tisch zwischen Ihnen und Ihrer Partnerin. Außerdem zeichnen zwei Kameras den Kopf und Oberkörper des jeweiligen Gegenübers auf (sogenannte Szenenkameras), ohne die das Eye-Tracking nicht funktionieren würde. Es kommen **keine** Geräte zum Einsatz, die am Kopf o.ä. getragen werden. Sollten Sie eine Brille oder Kontaktlinsen tragen, bitten wir Sie, diese zur Untersuchung mitzubringen. Sollten Sie beides besitzen, bringen Sie bitte Ihre Kontaktlinsen mit, da diese beim Eye-Tracking leichter auswertbare Ergebnisse liefern.

**Warum?** Der Eye-Tracker ist ein Gerät, das aufzeichnet wohin Sie blicken. In mehreren Studien wurde bereits gezeigt, dass depressiv erkrankte Menschen im Vergleich zu nicht depressiv erkrankten Menschen ein verändertes Blickverhalten aufweisen. Bis jetzt wurde dies jedoch noch nie in einer echten Gesprächssituation zweier Partner systematisch untersucht.

Wir erhoffen uns hieraus neue Erkenntnisse zu erlangen zum Beispiel zur Veränderung der Aufmerksamkeitslenkung. Die Aufnahmen der Szenenkameras erlauben außerdem eine Untersuchung der Kommunikationsmuster. Unser Ziel ist es, Unterschiede im Blickverhalten aufdecken zu können.

**Zufallsbefunde:** Keine bekannt.

## **6. Was ist das CBC-Training?**

Wenn Sie am CBC-Training teilnehmen, werden Sie Methoden erlernen, die sich auf ein positives Miteinander in der Partnerschaft beziehen. Als nicht-religiöse (säkulare) Methode bietet das Training verschiedene Wege an, Mitgefühl gegenüber einem umfassenden Kreis an Menschen zu kultivieren und auszudehnen. Im Vordergrund stehen hier jedoch der Partner und die partnerschaftliche Beziehung.

Die darin beinhalteten Praktiken unterstützen die Entwicklung einer Vielzahl von positiven Qualitäten, Erfahrungen und Verhaltensweisen, wie z.B. Freundlichkeit, Dankbarkeit, als auch Empathie und Mitgefühl. Die fundamentale Grundannahme ist, dass Mitgefühl als eine Persönlichkeitseigenschaft entwickelt und erweitert werden kann. Diese Annahme wird durch aktuelle Forschungsergebnisse unterstützt.

Dieses CBC-Training kombiniert gedankliche Komponenten und Übungen (u.a. Istzustandsanalyse, Achtsamkeits- und Mitgefühlsmeditationen) und solche, die die Partnerschaft und das soziale Miteinander betreffen (z.B. Empathietraining). In standardisierten Labortests wurde bereits gezeigt, dass ein solches Training die psychische und körperliche Stress- und Immunantwort bei gesunden Individuen verbessert. Ob sich das Training auch bei Menschen mit Depressionen und auf die



Belastungen von Seiten des Partners entsprechend positiv auswirkt, und ob es einen positiven Einfluss auf die partnerschaftliche Interaktion hat, ist bisher noch nicht erforscht.

Die Teilnahme an einem CBC-Training über 10 Wochen würde nach aktuellem Stand etwa 300€ pro Person kosten. Für Sie und Ihre Partnerin ist bei entsprechender Zufallslosung dieses Training jedoch komplett **kostenfrei**.

## 7. Datenschutz und Aufbewahrung

Die von Ihnen zur Verfügung gestellten Daten und Biomaterialien werden ausschließlich für die wissenschaftliche Forschung verwendet und streng vertraulich behandelt. Ihnen wird bei der ersten Registrierung als Studienteilnehmer eine pseudonymisierte, verschlüsselte Identifikationsnummer (ID-Nummer, aufsteigend) zugeordnet. Dies ist ein Code, der auf Ihren ausgefüllten Fragebögen, Speichelproben etc. steht und keinerlei Informationen über Sie als Person beinhaltet. Alle Materialien, die gesammelt werden, werden mit dieser Nummer versehen. Nur die in Papierform vorliegende Einwilligungserklärung wird sowohl den Namen, als auch diese ID-Nummer enthalten und separat von allen Daten 2-fach verschlossen aufbewahrt werden. Es werden keine Daten mit dem Namen, sondern nur mit Ihrer ID-Nummer analysiert und es gibt außer über die Einwilligungserklärung keinen Weg, den Namen mit der ID-Nummer zu verbinden. Alle psychologischen und körperlichen Daten werden ausschließlich über ID-Nummern kenntlich gemacht. Keine Publikation dieses Projekts wird Ihren Namen preisgeben. Darüber hinaus werden die Ergebnisse sämtlicher Datenanalysen getrennt von Ihren personenbezogenen Daten gespeichert und können nicht ohne Mitwirkung der Projekt- oder Studienleitung Ihrer Person zugeordnet werden.

Diese Studie wird überwiegend aus öffentlichen Mitteln (z.B. der Deutschen Forschungsgemeinschaft DFG) finanziert. In Zukunft ergeben sich möglicherweise neue wissenschaftliche Fragestellungen, die im Rahmen des oben genannten Forschungsbereiches mithilfe der bereits erhobenen Daten oder Biomaterialien beantwortet werden können. Eine Veröffentlichung der Daten kann folglich bei der Beantwortung dieser neuen Fragestellungen helfen, wodurch vergleichbare Daten nicht nochmals erhoben werden müssten und öffentliche Mittel dadurch effizienter genutzt werden könnten.

Die erhobenen Daten werden dazu nach Beendigung der Studie der nationalen und internationalen Wissenschaft in anonymisierter Form durch eine Veröffentlichung über das Forschungsdatenrepositorium der Universität Heidelberg „heiDATA“ zugänglich gemacht. Dies dient zusätzlich der wissenschaftlichen Qualitätssicherung im Sinne der Nachvollziehbarkeit der erbrachten Studienergebnisse. Eine Aufbewahrung der Daten bei heiDATA erfolgt **ohne** persönliche Identifikatoren (z.B. Name oder Kontaktdaten).



Die auf diese Weise veröffentlichten Daten sowie auch Veröffentlichungen in wissenschaftlichen Fachartikeln, welche die Daten in anonymisierter Form verwenden, bleiben dauerhaft öffentlich verfügbar.

Die Daten, Biomaterialien und ausgefüllten Fragebögen werden Eigentum des Instituts für Medizinische Psychologie des Universitätsklinikums Heidelberg. Die Speichel- und Blutproben werden dort aufbewahrt, oder mit Ihrer ID-Nummer verschlüsselt auch an andere Labore verschickt, welche mit diesen Proben Analysen durchführen. Ein Teil der Blutproben wird vom Zentralinstitut für Seelische Gesundheit (Abteilung Genetische Epidemiologie in der Psychiatrie des Zentralinstituts für Seelische Gesundheit) in Mannheim aufbewahrt, das Ihre Blutproben mit einer anderen, separat erzeugten ID-Nummer verschlüsselt zur Analyse des genetischen Materials erhält. Alle in dieser Studie erhobenen Biomaterialien werden befristet auf maximal 10 Jahre nach Beendigung der Studie aufbewahrt. Falls in Zukunft eine wesentlich veränderte wissenschaftliche Fragestellung mithilfe Ihrer Probe untersucht werden soll, wird zuvor eine Stellungnahme der zuständigen Ethikkommission eingeholt.

## 8. Risiken und Nutzen der Teilnahme

### Risiken:

Mit dem Erheben der Fragebogendaten, der Videoaufnahmen, der Aufnahmen der Blickbewegungen, der Langzeitmessungen des Pulses und der Entnahme der Speichelproben sind keinerlei Risiken verbunden.

Mit den Blutentnahmen bestehen die Risiken, die mit einer normalen Blutentnahme verbunden sind. Die Entnahme einer Blutprobe ist in der Regel nur mit einem sehr geringen Risiko verbunden. An der Einstichstelle kann es zu leichten Schmerzen kommen oder es kann ein Bluterguss (blauer Fleck) entstehen, der evtl. einige Tage sichtbar ist. In äußerst seltenen Fällen kann auch die Bildung eines Blutgerinnsels (Thrombose), eine örtlich begrenzte Entzündung oder eine Infektion an der Einstichstelle auftreten oder es kann zu dauerhaften Schädigungen von Blutgefäßen oder Nerven kommen. Die Blutentnahmen werden von einem dazu befähigten und qualifizierten Fachpersonal (i.d.R. Arzt) durchgeführt.

Die Zuordnung zu Behandlungs- bzw. Kontrollgruppe erfolgt über ein Zufallsverfahren (sog. Randomisierung), worauf wir keinen Einfluss haben. Diejenigen die der Kontrollgruppe zugeordnet werden, erhalten von unserer Seite zunächst keine Intervention. Die übliche Wartezeit auf einen individuellen Psychotherapieplatz für die an Depression Erkrankten, kann durch eine reguläre allgemeinärztliche bzw. pharmakologische antidepressive Behandlung aufgenommen bzw. weitergeführt werden.

Für diejenigen Paare, die an dem CBC-Training teilnehmen, sind keine besonderen Risiken zu erwarten. Bisher sind keine unerwünschten Wirkungen in Verbindung



mit dem CBC-Training wissenschaftlich erfasst worden. Es sind keine körperlichen oder psychischen Gefahren zu erwarten. Durch die potenziell emotionalen Erfahrungen während der Trainingssitzungen kann es zu psychischen Reaktionen kommen, z.B. Stimmungsschwankungen. Diese Reaktionen werden in den Sitzungen jedoch berücksichtigt und als wichtige Erlebnisse in das Geschehen des Gruppentrainings einbezogen. Alle Gruppentrainings werden von Psychologen bzw. Psychotherapeuten und zusätzlich in CBCT qualifizierten Trainern, durchgeführt, sowie begleitend von erfahrenen Psychotherapeuten supervidiert.

#### **Nutzen:**

Das hier durchgeführte Forschungsvorhaben zielt auf eine Verbesserung unseres Verständnisses für die Entstehung depressiver Störungen sowie deren Therapie durch psychologische Interventionen ab. Hierbei interessiert uns explizit der Einfluss der Partnerschaft und inwiefern die Belastung des Partners hierbei eine Rolle spielt.

Für diejenigen, die an einem für Sie kostenlosen CBC-Training teilnehmen werden, liegt der persönliche Nutzen darin, dass Sie Veränderungsimpulse im Umgang mit psychischen Belastungen und vor allem des partnerschaftlichen Umgangs miteinander erhalten können. Beispielsweise könnten Sie im Verlauf des Trainings erleben, wie Sie mit einem positiveren Blick oder Gefühl Ihrer Partnerin begegnen können. Sie können Impulse für neue Verhaltensweisen erhalten und erfahren, wie es sich anfühlt, wenn Sie eine alternative Haltung zu Ihren Problemen einnehmen.

Nach Ende der Studie werden Ihnen die Gesamtergebnisse der Studie mitgeteilt. Für Ihre vollständige Teilnahme an der Studie erhält **jedes Paar** insgesamt eine Aufwandsentschädigung in Höhe von **200€, also 50€ pro Person pro Messzeitpunkt**, unbar auf ein anzugebendes Konto.

Nach vollständiger Studienteilnahme haben Sie die Möglichkeit als Dankeschön an dem gruppenbasierten Mitgefühlstraining für Paare (CBC-Training) teilzunehmen. Die Kosten hierfür werden vom Institut übernommen (circa 300€ pro Person).

### **9. Freiwilligkeit der Teilnahme**

Die Erhebung, Verarbeitung und Nutzung der Daten im Rahmen des Projektes erfolgt auf Basis der Rechtsgrundlage der freiwilligen und informierten Einwilligung der Teilnehmer (gemäß §§ 4, 4a BDSG). Sie nehmen an dieser Studie freiwillig teil. Sie können Ihre Teilnahme jederzeit auch ohne Angabe von Gründen abbrechen; dies hat keinerlei negative Konsequenzen für Ihre Kursteilnahme oder Ihre Gesundheitsversorgung. Die Zuteilung zur Trainings- oder Kontrollgruppe erfolgt über eine Zufallsauswahl, so dass wir an dieser Stelle keine persönlichen Präferenzen berücksichtigen können.

Die Untersuchungen werden nur dann durchgeführt, wenn Sie dazu freiwillig und schriftlich Ihre Einwilligung erklären.





## 10. Widerrufsrecht

Sie können Ihre Einwilligung zur Verwendung Ihrer Daten und Biomaterialien jederzeit ohne Angabe von Gründen und ohne nachteilige Folgen für Sie widerrufen. Im Falle eines Widerrufs können Sie entscheiden, ob Ihre Biomaterialien vernichtet und die dazu gehörenden Daten gelöscht werden sollen oder ob Sie in anonymisierter Form für weitere Forschungsvorhaben verwendet werden dürfen. Dies gilt auch dann, wenn die verschlüsselten Daten und Blutproben zur wissenschaftlichen Analyse verschlüsselt an das ZI Mannheim weitergegeben wurden. Bereits erhobene Daten verbleiben auch nach Vernichtung des Biomaterials bzw. des Fragebogens in der Studie, soweit der Personenbezug nicht mehr besteht.

### **Wenden Sie sich für einen Widerruf bitte an die zuständige Studienleitung:**

Prof. Dr. phil. Dipl.- Psych. Beate Ditzen  
Institut für Medizinische Psychologie im  
Zentrum für Psychosoziale Medizin (ZPM)  
Universitätsklinikum Heidelberg  
Bergheimer Str. 20, D-69115 Heidelberg  
Tel.: +49 6221 56 8150  
E-Mail: beate.ditzen@med.uni-heidelberg.de

## 11. Erneute Kontaktaufnahme

Es besteht die Möglichkeit der Kontaktaufnahme durch die Studienleitung, wenn die Ihnen entnommenen Biomaterialien wider Erwarten Informationen enthalten, die für die Erhaltung oder Wiederherstellung Ihrer Gesundheit von erheblicher Bedeutung sind. Die Kontaktaufnahme wird durch die Studienleitung oder durch eine durch die Studienleitung beauftragte Person telefonisch, schriftlich oder per E-Mail erfolgen.

## 12. Versicherungsschutz

Für die Planung und Durchführung der Studie besteht ein Versicherungsschutz für Probanden im Rahmen der Betriebs-Haftpflichtversicherung des Universitätsklinikums Heidelberg. Der Versicherungsschutz erstreckt sich auf die gesetzliche Haftpflicht des Universitätsklinikums sowie auf die persönliche gesetzliche Haftpflicht aller im dienstlichen Auftrag für das Universitätsklinikum an der Studie mitwirkenden Mitarbeiter (Studienleiter, sonstiges Personal), beispielsweise für Schäden durch die Entnahme von Blutproben (Betriebs-/Umwelt-Haftpflicht-, Umweltschadens-Versicherung: Nr. 39327978 01116. Versicherer: HDI-Gerling Industrie Versicherung AG, HDI-Platz 1, 30659 Hannover, Telefon: +49 511 645-0, Telefax: +49 511 645-4545, E-Mail: info@hdi-gerling.de).



### 13. Weitere Informationen

Sollten Sie noch weitere Fragen haben, wenden Sie sich bitte an Ihre Studienleitung (die entsprechenden Kontaktinformationen finden Sie auf Seite 1 dieser Informationsschrift). Stellen Sie alle Fragen, die Ihnen wichtig erscheinen und lassen Sie sich ausreichend Zeit für Ihre Entscheidung zur Teilnahme an dieser wissenschaftlichen Untersuchung.

Mit freundlichen Grüßen

A handwritten signature in blue ink, appearing to read 'C. Aguilar-Raab'.

Dr. Corina Aguilar-Raab und Dr. Marc Jarczok  
(Projektleitung)

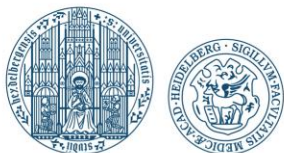

# HEIDELBERG UNIVERSITY HOSPITAL

Institute of Medical Psychology | Bergheimer Str. 20 | 69115 Heidelberg

## \*Consent Form for Women with Depressive Disorder (being in a romantic partnership) to the study: „Psychobiological Markers & Real -Time Interaction in Depression: the SIDE/CBCT Study“

### Version 3.0

**Study Participant (Surname, First name):** \_\_\_\_\_

**Date of Birth:** \_\_\_\_\_ . \_\_\_\_\_ . \_\_\_\_\_

ID-Sticker:  
(Pseudonym)

I hereby declare my consent to participate in the research project according to the above information. By signing, I confirm that I have read and understood the content of the information. I had the opportunity to ask questions that were satisfactorily answered. I know that my participation is voluntary and I can withdraw my consent at any time without giving any reason and demand the destruction of my blood and saliva samples and all the data, without causing any disadvantages.

- I expressly agree that my data and biomaterials may be used for the research purpose stated in the information document.
- I expressly agree that the property of the biomaterials taken from me will be transferred to the Institute for Medical Psychology of the University Hospital Heidelberg.

I am aware that I will not necessarily have a personal advantage from this research project.

From the body materials taken from me, contrary to expectations, medical findings, so-called incidental findings, can be obtained, which can be of considerable importance for the preservation or restoration of my own health. Below you can decide how the study management should deal with it:

- Yes**, I would like to be informed about incidental/random findings of my examination.

### Centre for Psychosocial Medicine

Department of General Psychiatry  
Prof. Sabine Herpertz

Department of General Internal  
Medicine and Psychosomatics  
Prof. Wolfgang Herzog

Department of Child and Adolescent  
Psychiatry  
Prof. Franz Resch

### Institute of Medical Psychology

**Prof. Beate Ditzen**

Institute of Psychosocial Prevention  
Prof. Svenja Taubner

### Team of Researchers:

**Prof. Beate Ditzen, PhD**  
Director of the Institute of Medical  
Psychology

### Project Leaders:

**Corina Aguilar-Raab, PhD**  
[Corina.Aguilar-Raab@med.uni-heidelberg.de](mailto:Corina.Aguilar-Raab@med.uni-heidelberg.de)

**Marc N. Jarczok, PhD**  
[Marc.Jarczok@med.uni-heidelberg.de](mailto:Marc.Jarczok@med.uni-heidelberg.de)

Institute of Medical Psychology  
Center of Psychosocial Medicine  
University Hospital  
Bergheimer Str. 20  
69115 Heidelberg

Fon: Corina Aguilar-Raab &  
Marc N. Jarczok  
+49-6221-568135

[www.medpsych.uni-hd.de](http://www.medpsych.uni-hd.de)

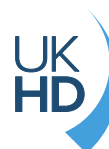

\* This is a free translation of the German Version

For peer review only - <http://bmjopen.bmj.com/site/about/guidelines.xhtml>

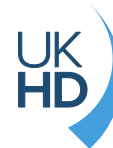

- No**, I do not want to be informed about incidental/random findings of my examination.

Furthermore, I am aware that for the purpose of collecting further historical data, it is possible to contact me again at a later date in order to request additional information and/or biomaterials from me.

A possible contact is made via the Director of the Institute of Medical Psychology:

Prof. Dr. phil. Dipl.-Psych. Beate Ditzen  
 Institut für Medizinische Psychologie im  
 Zentrum für Psychosoziale Medizin (ZPM)  
 Universitätsklinikum Heidelberg  
 Bergheimer Str. 20, D-69115 Heidelberg  
 Tel.: +49 6221 56 8150  
 E-Mail: beate.ditzen@med.uni-heidelberg.de

#### **Data Protection:**

I am aware that in this research project personal data, in particular biological findings and data generated from questionnaires, should be collected, stored and evaluated about me. The use of the information about these biological findings and data takes place according to legal regulations and requires the following voluntary declaration of consent before participating in the research project, i.e. I cannot participate in the research project without the following consent.

1. I agree that within the scope of this research project personal data, in particular information about biological findings (obtained from the blood and saliva samples taken) as well as data from questionnaire surveys, may be collected about me and recorded in paper form and on electronic data carriers at the University Hospital of Heidelberg. The collected data and blood samples may be passed on pseudonymized (encoded) to the department "Genetic Epidemiology in Psychiatry" of the Central Institute of Mental Health in Mannheim for scientific evaluation.
2. I have been informed that I can terminate my participation in the research project at any time. If I withdraw my consent to participate in the research project, I have the right to request the deletion of all my personal data stored until then and the destruction of all collected biomaterials (blood and saliva samples).
3. I agree that my data and biomaterials may be stored for a maximum of 10 years after completion or termination of the research project. Afterwards my personal data will be deleted, as far as legal or statutory retention periods do not oppose the deletion.
4. I agree that the collected data will be made available to the national and international scientific community in anonymous form through a publication via the research data repository of the University of Heidelberg "heiDATA". This serves additionally the scientific quality assurance in the sense of the comprehensibility of the provided study results. A storage of the data at heiDATA takes place without personal identifiers (e.g. name or contact data).  
 Die auf diese Weise veröffentlichten Daten sowie auch Veröffentlichungen in wissenschaftlichen Fachartikeln, welche die Daten in anonymisierter Form verwenden, bleiben dauerhaft öffentlich verfügbar.

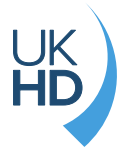

1  
2  
3  
4  
5  
6  
7  
8  
9 **I have received a copy of the study information and consent form. The original remains with**  
10 **the Institute for Medical Psychology of the University Hospital Heidelberg.**  
11  
12  
13  
14  
15

16 \_\_\_\_\_  
17 **Name of the study participant in block letters**  
18  
19  
20  
21  
22

23 Heidelberg, den \_\_\_\_\_

24 **Place, Date**

25 **Signature participant**  
26  
27  
28  
29  
30  
31  
32

33  
34  
35  
36  
37  
38 **I conducted the reconnaissance interview and obtained the consent of the subject.**  
39  
40  
41  
42  
43  
44  
45

46 \_\_\_\_\_  
47 **Name of the (technical) staff in block letters**  
48  
49  
50  
51  
52  
53  
54  
55  
56  
57  
58  
59  
60

Heidelberg, \_\_\_\_\_

**Place, Date**

**Signature (technical) staff**

## SPIRIT 2013 Checklist: Recommended items to address in a clinical trial protocol and related documents

| Section/item                                             | ItemNo | Description                                                                                                                                                                                                                                                                              | Executed        |
|----------------------------------------------------------|--------|------------------------------------------------------------------------------------------------------------------------------------------------------------------------------------------------------------------------------------------------------------------------------------------|-----------------|
| <b>Administrative information</b>                        |        |                                                                                                                                                                                                                                                                                          |                 |
| Title                                                    | 1      | Descriptive title identifying the study design, population, interventions, and, if applicable, trial acronym                                                                                                                                                                             | ✓ p.1           |
| Trial registration                                       | 2a     | Trial identifier and registry name. If not yet registered, name of intended registry                                                                                                                                                                                                     | ✓ p.2           |
|                                                          | 2b     | All items from the World Health Organization Trial Registration Data Set                                                                                                                                                                                                                 |                 |
| Protocol version                                         | 3      | Date and version identifier                                                                                                                                                                                                                                                              | ✓ p.1           |
| Funding                                                  | 4      | Sources and types of financial, material, and other support                                                                                                                                                                                                                              | ✓ p.24-25       |
| Roles and responsibilities                               | 5a     | Names, affiliations, and roles of protocol contributors                                                                                                                                                                                                                                  | ✓ p.1 & p.24-25 |
|                                                          | 5b     | Name and contact information for the trial sponsor                                                                                                                                                                                                                                       | not applicable  |
|                                                          | 5c     | Role of study sponsor and funders, if any, in study design; collection, management, analysis, and interpretation of data; writing of the report; and the decision to submit the report for publication, including whether they will have ultimate authority over any of these activities | not applicable  |
|                                                          | 5d     | Composition, roles, and responsibilities of the coordinating centre, steering committee, endpoint adjudication committee, data management team, and other individuals or groups overseeing the trial, if applicable (see Item 21a for data monitoring committee)                         | not applicable  |
| <b>Introduction</b>                                      |        |                                                                                                                                                                                                                                                                                          |                 |
| Background and rationale                                 | 6a     | Description of research question and justification for undertaking the trial, including summary of relevant studies (published and unpublished) examining benefits and harms for each intervention                                                                                       | ✓ p.4-9         |
|                                                          | 6b     | Explanation for choice of comparators                                                                                                                                                                                                                                                    | ✓ p.14-16       |
| Objectives                                               | 7      | Specific objectives or hypotheses                                                                                                                                                                                                                                                        | ✓ p.9           |
| Trial design                                             | 8      | Description of trial design including type of trial (eg, parallel group, crossover, factorial, single group), allocation ratio, and framework (eg, superiority, equivalence, noninferiority, exploratory)                                                                                | ✓ p.10          |
| <b>Methods: Participants, interventions and outcomes</b> |        |                                                                                                                                                                                                                                                                                          |                 |

|                                                                     |     |                                                                                                                                                                                                                                                                                                                                                                                |           |
|---------------------------------------------------------------------|-----|--------------------------------------------------------------------------------------------------------------------------------------------------------------------------------------------------------------------------------------------------------------------------------------------------------------------------------------------------------------------------------|-----------|
| Study setting                                                       | 9   | Description of study settings (eg, community clinic, academic hospital) and list of countries where data will be collected. Reference to where list of study sites can be obtained                                                                                                                                                                                             | ✓ p.10-11 |
| Eligibility criteria                                                | 10  | Inclusion and exclusion criteria for participants. If applicable, eligibility criteria for study centres and individuals who will perform the interventions (eg, surgeons, psychotherapists)                                                                                                                                                                                   | ✓ p.10-11 |
| Interventions                                                       | 11a | Interventions for each group with sufficient detail to allow replication, including how and when they will be administered                                                                                                                                                                                                                                                     | ✓ p.14-17 |
|                                                                     | 11b | Criteria for discontinuing or modifying allocated interventions for a given trial participant (eg, drug dose change in response to harms, participant request, or improving/worsening disease)                                                                                                                                                                                 | ✓ p.16    |
|                                                                     | 11c | Strategies to improve adherence to intervention protocols, and any procedures for monitoring adherence (eg, drug tablet return, laboratory tests)                                                                                                                                                                                                                              | ✓ p.17    |
|                                                                     | 11d | Relevant concomitant care and interventions that are permitted or prohibited during the trial                                                                                                                                                                                                                                                                                  | ✓ p.10-11 |
| Outcomes                                                            | 12  | Primary, secondary, and other outcomes, including the specific measurement variable (eg, systolic blood pressure), analysis metric (eg, change from baseline, final value, time to event), method of aggregation (eg, median, proportion), and time point for each outcome. Explanation of the clinical relevance of chosen efficacy and harm outcomes is strongly recommended | ✓ p.17-21 |
| Participant timeline                                                | 13  | Time schedule of enrolment, interventions (including any run-ins and washouts), assessments, and visits for participants. A schematic diagram is highly recommended (see Figure)                                                                                                                                                                                               | ✓ fig.3   |
| Sample size                                                         | 14  | Estimated number of participants needed to achieve study objectives and how it was determined, including clinical and statistical assumptions supporting any sample size calculations                                                                                                                                                                                          | ✓ p.21-22 |
| Recruitment                                                         | 15  | Strategies for achieving adequate participant enrolment to reach target sample size                                                                                                                                                                                                                                                                                            | ✓ p.10    |
| <b>Methods: Assignment of interventions (for controlled trials)</b> |     |                                                                                                                                                                                                                                                                                                                                                                                |           |
| <b>Allocation:</b>                                                  |     |                                                                                                                                                                                                                                                                                                                                                                                |           |

|    |                                                           |     |                                                                                                                                                                                                                                                                                                                                                                                                              |
|----|-----------------------------------------------------------|-----|--------------------------------------------------------------------------------------------------------------------------------------------------------------------------------------------------------------------------------------------------------------------------------------------------------------------------------------------------------------------------------------------------------------|
| 1  |                                                           |     |                                                                                                                                                                                                                                                                                                                                                                                                              |
| 2  |                                                           |     |                                                                                                                                                                                                                                                                                                                                                                                                              |
| 3  |                                                           |     |                                                                                                                                                                                                                                                                                                                                                                                                              |
| 4  |                                                           |     |                                                                                                                                                                                                                                                                                                                                                                                                              |
| 5  |                                                           |     |                                                                                                                                                                                                                                                                                                                                                                                                              |
| 6  | Sequence generation                                       | 16a | Method of generating the allocation sequence (eg, computer-generated random numbers), and list of any factors for stratification. To reduce predictability of a random sequence, details of any planned restriction (eg, blocking) should be provided in a separate document that is unavailable to those who enrol participants or assign interventions                                                     |
| 7  |                                                           |     | ✓ p.13-14                                                                                                                                                                                                                                                                                                                                                                                                    |
| 8  |                                                           |     |                                                                                                                                                                                                                                                                                                                                                                                                              |
| 9  | Allocation concealment mechanism                          | 16b | Mechanism of implementing the allocation sequence (eg, central telephone; sequentially numbered, opaque, sealed envelopes), describing any steps to conceal the sequence until interventions are assigned                                                                                                                                                                                                    |
| 10 |                                                           |     | ✓ p.13-14                                                                                                                                                                                                                                                                                                                                                                                                    |
| 11 |                                                           |     |                                                                                                                                                                                                                                                                                                                                                                                                              |
| 12 | Implementation                                            | 16c | Who will generate the allocation sequence, who will enrol participants, and who will assign participants to interventions                                                                                                                                                                                                                                                                                    |
| 13 |                                                           |     | ✓ p.13-14                                                                                                                                                                                                                                                                                                                                                                                                    |
| 14 |                                                           |     |                                                                                                                                                                                                                                                                                                                                                                                                              |
| 15 | Blinding (masking)                                        | 17a | Who will be blinded after assignment to interventions (eg, trial participants, care providers, outcome assessors, data analysts), and how                                                                                                                                                                                                                                                                    |
| 16 |                                                           |     | ✓ p.13-14                                                                                                                                                                                                                                                                                                                                                                                                    |
| 17 |                                                           |     |                                                                                                                                                                                                                                                                                                                                                                                                              |
| 18 |                                                           | 17b | If blinded, circumstances under which unblinding is permissible, and procedure for revealing a participant's allocated intervention during the trial                                                                                                                                                                                                                                                         |
| 19 |                                                           |     | ✓ p.13-14                                                                                                                                                                                                                                                                                                                                                                                                    |
| 20 | <b>Methods: Data collection, management, and analysis</b> |     |                                                                                                                                                                                                                                                                                                                                                                                                              |
| 21 |                                                           |     |                                                                                                                                                                                                                                                                                                                                                                                                              |
| 22 |                                                           |     |                                                                                                                                                                                                                                                                                                                                                                                                              |
| 23 | Data collection methods                                   | 18a | Plans for assessment and collection of outcome, baseline, and other trial data, including any related processes to promote data quality (eg, duplicate measurements, training of assessors) and a description of study instruments (eg, questionnaires, laboratory tests) along with their reliability and validity, if known. Reference to where data collection forms can be found, if not in the protocol |
| 24 |                                                           |     | ✓ p.11-21                                                                                                                                                                                                                                                                                                                                                                                                    |
| 25 |                                                           |     |                                                                                                                                                                                                                                                                                                                                                                                                              |
| 26 |                                                           |     |                                                                                                                                                                                                                                                                                                                                                                                                              |
| 27 |                                                           |     |                                                                                                                                                                                                                                                                                                                                                                                                              |
| 28 |                                                           | 18b | Plans to promote participant retention and complete follow-up, including list of any outcome data to be collected for participants who discontinue or deviate from intervention protocols                                                                                                                                                                                                                    |
| 29 |                                                           |     | ✓ p.11-13                                                                                                                                                                                                                                                                                                                                                                                                    |
| 30 |                                                           |     |                                                                                                                                                                                                                                                                                                                                                                                                              |
| 31 | Data management                                           | 19  | Plans for data entry, coding, security, and storage, including any related processes to promote data quality (eg, double data entry; range checks for data values). Reference to where details of data management procedures can be found, if not in the protocol                                                                                                                                            |
| 32 |                                                           |     | ✓ p.21,22 & 24                                                                                                                                                                                                                                                                                                                                                                                               |
| 33 |                                                           |     |                                                                                                                                                                                                                                                                                                                                                                                                              |
| 34 | Statistical methods                                       | 20a | Statistical methods for analysing primary and secondary outcomes. Reference to where other details of the statistical analysis plan can be found, if not in the protocol                                                                                                                                                                                                                                     |
| 35 |                                                           |     | ✓ p.21                                                                                                                                                                                                                                                                                                                                                                                                       |
| 36 |                                                           |     |                                                                                                                                                                                                                                                                                                                                                                                                              |
| 37 |                                                           | 20b | Methods for any additional analyses (eg, subgroup and adjusted analyses)                                                                                                                                                                                                                                                                                                                                     |
| 38 |                                                           |     | not applicable                                                                                                                                                                                                                                                                                                                                                                                               |
| 39 |                                                           |     |                                                                                                                                                                                                                                                                                                                                                                                                              |
| 40 |                                                           |     |                                                                                                                                                                                                                                                                                                                                                                                                              |
| 41 |                                                           |     |                                                                                                                                                                                                                                                                                                                                                                                                              |
| 42 |                                                           |     |                                                                                                                                                                                                                                                                                                                                                                                                              |
| 43 |                                                           |     |                                                                                                                                                                                                                                                                                                                                                                                                              |
| 44 |                                                           |     |                                                                                                                                                                                                                                                                                                                                                                                                              |
| 45 |                                                           |     |                                                                                                                                                                                                                                                                                                                                                                                                              |
| 46 |                                                           |     |                                                                                                                                                                                                                                                                                                                                                                                                              |
| 47 |                                                           |     |                                                                                                                                                                                                                                                                                                                                                                                                              |



|                                 |     |                                                                                                                                                                                                                                                                                                                                       |                |
|---------------------------------|-----|---------------------------------------------------------------------------------------------------------------------------------------------------------------------------------------------------------------------------------------------------------------------------------------------------------------------------------------|----------------|
|                                 | 20c | Definition of analysis population relating to protocol non-adherence (eg, as randomised analysis), and any statistical methods to handle missing data (eg, multiple imputation)                                                                                                                                                       | ✓ p.21         |
| <b>Methods: Monitoring</b>      |     |                                                                                                                                                                                                                                                                                                                                       |                |
| Data monitoring                 | 21a | Composition of data monitoring committee (DMC); summary of its role and reporting structure; statement of whether it is independent from the sponsor and competing interests; and reference to where further details about its charter can be found, if not in the protocol. Alternatively, an explanation of why a DMC is not needed | not applicable |
|                                 | 21b | Description of any interim analyses and stopping guidelines, including who will have access to these interim results and make the final decision to terminate the trial                                                                                                                                                               | not applicable |
| Harms                           | 22  | Plans for collecting, assessing, reporting, and managing solicited and spontaneously reported adverse events and other unintended effects of trial interventions or trial conduct                                                                                                                                                     | not applicable |
| Auditing                        | 23  | Frequency and procedures for auditing trial conduct, if any, and whether the process will be independent from investigators and the sponsor                                                                                                                                                                                           | not applicable |
| <b>Ethics and dissemination</b> |     |                                                                                                                                                                                                                                                                                                                                       |                |
| Research ethics approval        | 24  | Plans for seeking research ethics committee/institutional review board (REC/IRB) approval                                                                                                                                                                                                                                             | ✓ p.23-24      |
| Protocol amendments             | 25  | Plans for communicating important protocol modifications (eg, changes to eligibility criteria, outcomes, analyses) to relevant parties (eg, investigators, REC/IRBs, trial participants, trial registries, journals, regulators)                                                                                                      | ✓ p.24         |
| Consent or assent               | 26a | Who will obtain informed consent or assent from potential trial participants or authorised surrogates, and how (see Item 32)                                                                                                                                                                                                          | ✓ p.23-24      |
|                                 | 26b | Additional consent provisions for collection and use of participant data and biological specimens in ancillary studies, if applicable                                                                                                                                                                                                 | not applicable |
| Confidentiality                 | 27  | How personal information about potential and enrolled participants will be collected, shared, and maintained in order to protect confidentiality before, during, and after the trial                                                                                                                                                  | ✓ p.24         |
| Declaration of interests        | 28  | Financial and other competing interests for principal investigators for the overall trial and each study site                                                                                                                                                                                                                         | ✓ p.24         |
| Access to data                  | 29  | Statement of who will have access to the final trial dataset, and disclosure of contractual agreements that limit such access for investigators                                                                                                                                                                                       | ✓ p.24         |
| Ancillary and post-trial care   | 30  | Provisions, if any, for ancillary and post-trial care, and for compensation to those who suffer harm from trial participation                                                                                                                                                                                                         | not applicable |

1  
2  
3  
4  
5  
6  
7  
8  
9  
10  
11  
12  
13  
14  
15  
16  
17  
18  
19  
20  
21  
22  
23  
24  
25  
26  
27  
28  
29  
30  
31  
32  
33  
34  
35  
36  
37  
38  
39  
40  
41  
42  
43  
44  
45  
46  
47

|                            |     |                                                                                                                                                                                                                                                                                     |                |
|----------------------------|-----|-------------------------------------------------------------------------------------------------------------------------------------------------------------------------------------------------------------------------------------------------------------------------------------|----------------|
| Dissemination policy       | 31a | Plans for investigators and sponsor to communicate trial results to participants, healthcare professionals, the public, and other relevant groups (eg, via publication, reporting in results databases, or other data sharing arrangements), including any publication restrictions | ✓ p.24         |
|                            | 31b | Authorship eligibility guidelines and any intended use of professional writers                                                                                                                                                                                                      | not applicable |
|                            | 31c | Plans, if any, for granting public access to the full protocol, participant-level dataset, and statistical code                                                                                                                                                                     | ✓ p.24         |
| <b>Appendices</b>          |     |                                                                                                                                                                                                                                                                                     |                |
| Informed consent materials | 32  | Model consent form and other related documentation given to participants and authorised surrogates                                                                                                                                                                                  | ✓ app. 2-4     |
| Biological specimens       | 33  | Plans for collection, laboratory evaluation, and storage of biological specimens for genetic or molecular analysis in the current trial and for future use in ancillary studies, if applicable                                                                                      | ✓ p.18-21      |
