# Supplementary material for: Enhancing Social Interaction in Depression (SIDE study): protocol of a randomised controlled trial on the effects of a Cognitively Based Compassion Training (CBCT) for couples
Source: PubMed Central journal article supplement — BMJ Open. 2018 Oct 4;8(9):e020448. doi: 10.1136/bmjopen-2017-020448 (PMC6173246; doi:10.1136/bmjopen-2017-020448), 2018-10-04
Supplement: bmjopen-2017-020448supp001.pdf [file bmjopen-2017-020448supp001.pdf]

## APPENDIX 1: Example laboratory set up

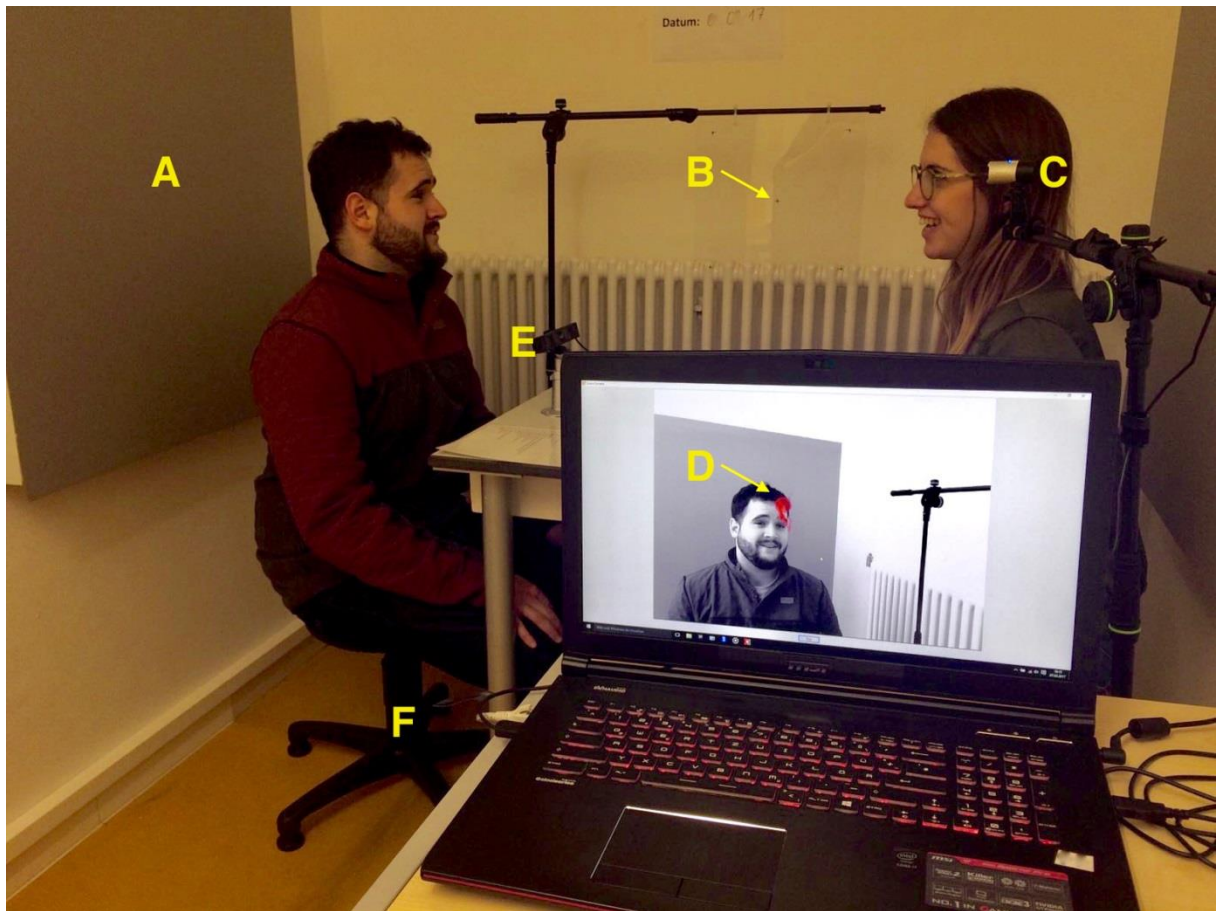

A: Homogeneous grey wall enhancing detection; B: Stand with calibration screen grid, swings towards nose with central point (arrow); C: Stand with Full HD Scene cam; D: Live view of scene cam with red dot indicating gaze point; E: Eye-tracker; F: height adjustable chair.

Note: The two persons depicted here, are lab members who gave written consent publishing this picture.
