# Supplementary material for: Enhancing Social Interaction in Depression (SIDE study): protocol of a randomised controlled trial on the effects of a Cognitively Based Compassion Training (CBCT) for couples
Source: PubMed Central journal article supplement — BMJ Open. 2018 Oct 4;8(9):e020448. doi: 10.1136/bmjopen-2017-020448 (PMC6173246; doi:10.1136/bmjopen-2017-020448), 2018-10-04
Supplement: bmjopen-2017-020448supp002.pdf [file bmjopen-2017-020448supp002.pdf]

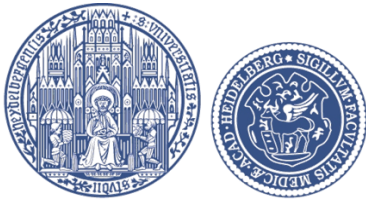

## Einwilligungserklärung zur Studie: „Psychobiologische Marker und reales Interaktionsverhalten bei Depression: CBCT-Studie“

Version 3.0

Proband (Name, Vorname):

Geb.-Datum: \_\_\_\_\_ . \_\_\_\_\_ . \_\_\_\_\_

ID-Aufkleber:  
(Pseudonym)

Hiermit erkläre ich meine Einwilligung zur Teilnahme an dem Forschungsprojekt gemäß der vorstehenden Information. Durch meine Unterschrift bestätige ich, dass ich den Inhalt der Information gelesen und verstanden habe. Ich hatte Gelegenheit Fragen zu stellen, die mir zufriedenstellend beantwortet wurden. Ich weiß, dass meine Teilnahme freiwillig ist und ich meine Einwilligung jederzeit ohne Angabe von Gründen widerrufen und die Vernichtung meiner Blut- und Speichelproben sowie aller Daten fordern kann, ohne dass mir daraus irgendwelche Nachteile entstehen.

- Ich bin ausdrücklich damit einverstanden, dass meine Daten und Biomaterialien für den in der Informationsschrift benannten Forschungszweck verwendet werden.
- Ich stimme ausdrücklich zu, dass das Eigentum der mir entnommenen Biomaterialien an das Institut für Medizinische Psychologie des Universitätsklinikums Heidelberg übertragen wird.

Mir ist bewusst, dass ich nicht notwendigerweise einen persönlichen Vorteil aus diesem Forschungsprojekt haben werde.

Aus den mir entnommenen Körpermaterialien können wider Erwarten medizinische Erkenntnisse, sogenannte Zufallsbefunde, erlangt werden, die für die Erhaltung oder Wiederherstellung meiner eigenen Gesundheit von erheblicher Bedeutung sein können. Nachstehend können Sie entscheiden wie die Studienleitung damit umgehen soll:

- Ja, ich möchte über Zufallsbefunde meiner Untersuchung informiert werden.
- Nein, ich möchte über Zufallsbefunde meiner Untersuchung **nicht** informiert werden.

### Zentrum für Psychosoziale Medizin

Klinik für Allgemeine Psychiatrie  
mit Poliklinik  
Prof. Dr. Sabine Herpertz  
Klinik für Psychosomatische u. Allgemeine Klinische Medizin  
Prof. Dr. W. Herzog  
Klinik für Kinder- u. Jugendpsychiatrie  
Prof. Dr. F. Resch  
**Institut für Medizinische Psychologie**  
**Prof. Dr. B. Ditzen**  
Institut für Psychosoziale Prävention  
Prof. Dr. phil. Svenja Taubner

### Forschungsteam:

**Prof. Dr. Beate Ditzen**

Direktorin des Instituts für Medizinische Psychologie

### Projektleitung:

**Dr. Corina Aguilar-Raab, Dipl.-Psych.**  
[Corina.Aguilar-Raab@med.uni-heidelberg.de](mailto:Corina.Aguilar-Raab@med.uni-heidelberg.de)  
**Dr. Marc N. Jarczok, Dipl. SoWi**  
[marc.jarczok@med.uni-heidelberg.de](mailto:marc.jarczok@med.uni-heidelberg.de)

Institut für Medizinische Psychologie im  
Zentrum für Psychosoziale Medizin des  
UniversitätsKlinikums Heidelberg

Bergheimer Straße 20  
D-69115 Heidelberg

Tel.: Dr. Aguilar-Raab & Dr. Jarczok  
06221/568135

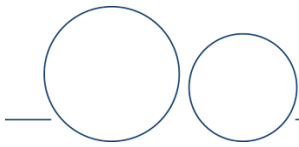

Weiterhin ist mir bewusst, dass zum Zwecke der Erhebung von weiteren Verlaufsdaten die Möglichkeit besteht, mich zu einem späteren Zeitpunkt erneut zu kontaktieren, um ergänzende Informationen und/oder Biomaterialien von mir zu erbitten.

Eine mögliche Kontaktaufnahme erfolgt über die Studienleiterin:

Prof. Dr. phil. Dipl.- Psych. Beate Ditzen  
Institut für Medizinische Psychologie im  
Zentrum für Psychosoziale Medizin (ZPM)  
Universitätsklinikum Heidelberg  
Bergheimer Str. 20, D-69115 Heidelberg  
Tel.: +49 6221 56 8150  
E-Mail: [beate.ditzen@med.uni-heidelberg.de](mailto:beate.ditzen@med.uni-heidelberg.de)

**Datenschutz:**

Mir ist bekannt, dass bei diesem Forschungsvorhaben personenbezogene Daten, insbesondere biologische Befunde und Daten, die aus Fragebögen generiert werden, über mich erhoben, gespeichert und ausgewertet werden sollen. Die Verwendung der Angaben über diese biologischen Befunde und Daten erfolgt nach gesetzlichen Bestimmungen und setzt vor der Teilnahme an dem Forschungsvorhaben folgende freiwillig abgegebene Einwilligungserklärung voraus, das heißt ohne die nachfolgende Einwilligung kann ich nicht an dem Forschungsvorhaben teilnehmen.

1. Ich erkläre mich damit einverstanden, dass im Rahmen dieses Forschungsvorhabens personenbezogene Daten, insbesondere Angaben über biologische Befunde (gewonnen aus den entnommenen Blut- und Speichelproben) sowie Daten aus Fragebogenbefragungen, über mich erhoben und in Papierform sowie auf elektronischen Datenträgern im Universitätsklinikum Heidelberg aufgezeichnet werden. Die erhobenen Daten und Blutproben dürfen pseudonymisiert (verschlüsselt) an die Abteilung „Genetische Epidemiologie in der Psychiatrie“ des Zentralinstituts für Seelische Gesundheit in Mannheim zum Zwecke der wissenschaftlichen Auswertung weitergegeben werden.
2. Ich bin darüber aufgeklärt worden, dass ich jederzeit die Teilnahme an dem Forschungsvorhaben beenden kann. Beim Widerruf meiner Einwilligung, an dem Forschungsvorhaben teilzunehmen, habe ich das Recht, die Löschung aller meiner bis dahin gespeicherten personenbezogenen Daten und die Vernichtung aller erhobenen Biomaterialien (Blut- und Speichelproben) zu verlangen.
3. Ich erkläre mich damit einverstanden, dass meine Daten und Biomaterialien nach Beendigung oder Abbruch des Forschungsvorhabens für maximal 10 Jahre aufbewahrt werden. Danach werden meine personenbezogenen Daten gelöscht, soweit nicht gesetzliche oder satzungsmäßige Aufbewahrungsfristen der Löschung entgegenstehen.

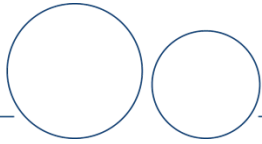

4. Ich erkläre mich damit einverstanden, dass die erhobenen Daten nach Beendigung der Studie der nationalen und internationalen Wissenschaft in anonymisierter Form durch eine Veröffentlichung über das Forschungsdatenrepositorium der Universität Heidelberg „heiDATA“ zugänglich gemacht werden. Dies dient zusätzlich der wissenschaftlichen Qualitätssicherung im Sinne der Nachvollziehbarkeit der erbrachten Studienergebnisse. Eine Aufbewahrung der Daten bei heiDATA erfolgt **ohne** persönliche Identifikatoren (z.B. Name oder Kontaktdaten). Die auf diese Weise veröffentlichten Daten sowie auch Veröffentlichungen in wissenschaftlichen Fachartikeln, welche die Daten in anonymisierter Form verwenden, bleiben dauerhaft öffentlich verfügbar.



**Eine Kopie der Probandeninformation und Einwilligungserklärung habe ich erhalten. Das Original verbleibt beim Institut für Medizinische Psychologie des Universitätsklinikums Heidelberg.**

---

**Name des Probanden in Druckbuchstaben**

Heidelberg, den

---

**Ort, Datum**

**Unterschrift des Probanden**

**Ich habe das Aufklärungsgespräch geführt und die Einwilligung des Probanden eingeholt.**

---

**Name des Fachpersonals in Druckbuchstaben**

Heidelberg, den

---

**Ort, Datum**

**Unterschrift des Fachpersonals**
