# Supplementary material for: Enhancing Social Interaction in Depression (SIDE study): protocol of a randomised controlled trial on the effects of a Cognitively Based Compassion Training (CBCT) for couples
Source: PubMed Central journal article supplement — BMJ Open. 2018 Oct 4;8(9):e020448. doi: 10.1136/bmjopen-2017-020448 (PMC6173246; doi:10.1136/bmjopen-2017-020448), 2018-10-04
Supplement: bmjopen-2017-020448supp004.pdf [file bmjopen-2017-020448supp004.pdf]

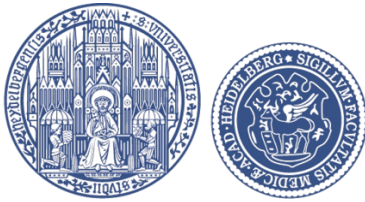

## Informationsschrift für Männer in Partnerschaft mit an Depression erkrankter Partnerin zur Studie: „Psychobiologische Marker und reales Interaktionsverhalten bei Depression: CBCT-Studie“

Version 3.0

Sehr geehrter Studienteilnehmer,

herzlichen Dank für Ihr Interesse an unserer Studie mit dem Titel „*Psychobiologische Marker und reales Interaktionsverhalten: CBCT-Studie*“. Wir möchten Sie mit diesem Informationsschreiben über unsere Studie umfassend informieren.

### 1. Unsere Studie: Worum geht es und warum ist sie wichtig?

Die Depression gehört zu den am weitesten verbreiteten psychischen Störungen weltweit. Nach wie vor sind die Ursachen für eine Depression ungeklärt und wir forschen intensiv zu möglichen Behandlungsansätzen. Nachgewiesen sind bei der Depression Veränderungen von Aufmerksamkeits-, Wahrnehmungs- und Denkprozessen. Diese könnten daran beteiligt sein, dass sich Erkrankte zurückziehen und Gefühle der Unverbundenheit und Einsamkeit auftreten. Ein relativ neuer Therapieansatz bei Depressionen sind Trainings, die auf Achtsamkeit und Mitgefühl fokussieren. Da bei einer Depression häufig zentrale soziale Beziehungen wie zum Beispiel Partnerschaft oder Ehe beeinträchtigt sein können, berichten oft auch die Partner von psychischen Belastungen (z.B. Stress). Somit könnte diese neue Interventionsform zentrale soziale Beziehungen und die eigene Partnerschaft verbessern, sowie gesundheitsförderliche Effekte durch ein verringertes Stresserleben für beide Partner entfalten.

Im Rahmen dieser Studie möchten wir in einem ersten Teil deshalb überprüfen, **welche Unterschiede** es konkret zwischen Paaren mit und ohne an Depression erkrankter Partnerin gibt.

Hierbei untersuchen wir ein kurzes, angeleitetes **positives Partnerschaftsgespräch**, wozu wir Paare zu uns ins Institut für Medizinische Psychologie einladen. Wir sind an **Verhaltensbeobachtung**, aber auch an verschiedenen **Reaktionen auf körperlicher Ebene** (z.B. Ausmaß an vorhandenen Stresshormonen), die eine psychische Belastung „messbar“ machen, interessiert.

In einem zweiten Teil geht es darum, ob ein Achtsamkeits- und Mitgefühlsbasiertes Gruppentraining für Paare (sog. CBC-Training entwickelt an der Emory Universität in Atlanta, USA): aus dem Englischen = „Cognitively-Based Compassion Training“ –

### Zentrum für Psychosoziale Medizin

Klinik für Allgemeine Psychiatrie  
mit Poliklinik

Prof. Dr. Sabine Herpertz

Klinik für Psychosomatische u. Allgemeine Klinische Medizin

Prof. Dr. W. Herzog

Klinik für Kinder- u. Jugendpsychiatrie

Prof. Dr. F. Resch

Institut für Medizinische Psychologie  
Prof. Dr. B. Ditzen

Institut für Psychosoziale Prävention  
Prof. Dr. phil. Svenja Taubner

### Forschungsteam:

Prof. Dr. Beate Ditzen

Direktorin des Instituts für Medizinische Psychologie

### Projektleitung:

Dr. Corina Aguilar-Raab, Dipl.-Psych.  
[Corina.Aguilar-Raab@med.uni-heidelberg.de](mailto:Corina.Aguilar-Raab@med.uni-heidelberg.de)

Dr. Marc N. Jarczok, Dipl. SoWi  
[marc.jarczok@med.uni-heidelberg.de](mailto:marc.jarczok@med.uni-heidelberg.de)

Institut für Medizinische Psychologie im  
Zentrum für Psychosoziale Medizin des  
UniversitätsKlinikums Heidelberg

Bergheimer Straße 20  
D-69115 Heidelberg

Tel.: Dr. Aguilar-Raab & Dr. Jarczok  
06221/568135

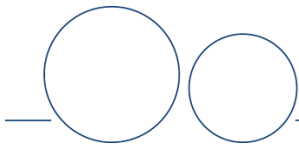

kognitiv-basiertes Mitgefühlstraining) die Belastung des Partners und die Symptome der Depression vermindert sowie die Partnerschaftsqualität sowie mögliche negative Auswirkungen der Depression auf die eigene körperliche Gesundheit (beispielsweise Stressreaktion) reduziert. Hierbei werden die teilnehmenden Paare per Zufallsprinzip zwei Gruppen zugeordnet: bei der einen Hälfte erfolgt das eben beschriebene CBC-Training, bei der anderen Hälfte nicht – diese Gruppe dient als Kontroll- bzw. Vergleichsgruppe.

Die zufällige Zuteilung (sogenannte Randomisierung) ist eines der wesentlichen Verfahren zur Sicherstellung der Verallgemeinerbarkeit der Studienergebnisse, daher kann die einmal getroffene Zuteilung von der Studienleitung nicht beeinflusst werden. Die Wahrscheinlichkeit, dass Sie in die CBC-Trainingsgruppe kommen liegt bei 50 Prozent.

## **2. Welche Daten werden in der Studie erfasst?**

In dieser Studie werden Selbstberichtsdaten (erfasst über Fragebögen) und körperliche/biologische Daten („Echtzeit-Blickbewegung/Eye-Tracking“, „Stress-Hormone“, „Stress-Enzyme“, „Stress-Physiologie“, „Immun-Parameter“, „24h Puls“ und „genetische Marker“) erhoben. Die körperlichen Daten werden hierbei zusammenfassend als ***Biomaterial*** bezeichnet.

## **3. Wie oft werden diese Daten erhoben?**

Die unten beschriebene Datenerhebung erfolgt zwei Mal und in allen Gruppen: Sowohl bei der Gruppe, die das CBC-Training erhält, als auch bei der Gruppe ohne Training: Das erste Mal vor Beginn des Trainings und das zweite Mal nach 10 Wochen, bzw. nach Abschluss des Trainings. Circa 4 und 8 Wochen nach der zweiten Datenerhebung erfolgt eine online Fragebogenbefragung, die Sie von zuhause aus durchführen können.

## **4. Welcher Zeitaufwand geht hiermit einher?**

Der Zeitaufwand gliedert sich wie folgt:

1. Telefonischer Erstkontakt (5-15 Min.) (bereits erfolgt).
2. Sie erhalten eine weitere Einladung in das Institut für Medizinische Psychologie. Im Rahmen des Labortag 1 findet ein vorbereitendes Gespräch, eine Screening-Erhebung und ein diagnostisches Interview sowie die Blutabnahme statt (heutiger Termin). Danach erhalten Sie und Ihre Partnerin einen Brustgurt der Ihren Puls für ca. 24 Stunden im Alltag misst. Mit diesem werden Sie nach Hause entlassen (ca. 2,5 Stunden).



3. Wir bitten Sie, zuhause einige Fragebögen auszufüllen, die wir Ihnen nach dem 1. Tag mitgeben (ca. 30 Minuten).
  
4. Labortag 2 am Institut für Medizinische Psychologie (zw. 15 und 20 Uhr): Nach einer kurzen Vorbereitung erfolgt eine angeleitete 10-minütige positive soziale Interaktion mit Ihrer Partnerin. Während dieser Interaktion werden Ihre Blickbewegungen und weiterhin der Puls (Brustgurt) gemessen. Vor und nach der Interaktion werden insgesamt 4 Speichelproben entnommen (siehe Punkt 6 für genauere Angaben: „**Wie werden die Reaktionen auf körperliche Ebene gemessen und warum? - Messungen der Blickbewegungen und des Pulses sowie die Entnahme von Biomaterialien Blut- und Speichelproben**“). Danach füllen Sie und Ihre Partnerin verschiedene Fragebögen aus. Im Anschluss werden Sie und Ihre Partnerin zu einem abschließenden Paargespräch gebeten. Die Gesamtdauer beträgt insgesamt ca. 160 Minuten.

Für diejenigen Paare, die auch an dem CBC-Training teilnehmen, erfolgen einmal wöchentliche, zweistündige Gruppen-Sitzungen, die ebenfalls zur Qualitätssicherung per Video aufgenommen werden. Am Ende jeder Sitzung erfolgt eine kurze Fragebogenbefragung (5 Min.). In den zehn Wochen des CBC-Trainings werden Übungen und teilweise Hausaufgabe bzw. Partnerübungen aufgegeben (jeweils 8-12 Min.). Sie werden vier Mal pro Woche morgens per Kurznachricht (sog. SMS) über Ihr Smartphone daran erinnert, und zu Ihrer Übung und Ihrer Befindlichkeit befragt. In der SMS befindet sich dazu ein Link. Wenn Sie auf diesen Link klicken, gelangen Sie zu einer kurzen, internetbasierten Abfrage, welche die Dauer und Intensität sowie ihr aktuelles Befinden erfragt (1-3 Min.). Das Beantworten dieser Fragen können Sie überall dort umsetzen, wo Sie ein internetfähiges Gerät nutzen können (z.B. Ihr Smartphone, Ihren Laptop, Ihr Tablet-PC etc.).

Die Paare, die nicht am CBC-Training teilnehmen, werden nur einmal wöchentlich per SMS zu ihrer aktuellen Befindlichkeit befragt (5 Min.). Die Termine der einzelnen Untersuchungsschritte und des CBC-Trainings werden mit Ihnen einzeln abgestimmt – hierzu werden wir Sie zeitnah persönlich kontaktieren. Bei Rückfragen können Sie sich jederzeit an die Projektleiter (Dr. Corina Aguilar-Raab, Dr. Marc N. Jarczok) wenden. Die entsprechenden Kontaktinformationen der Projektleitung entnehmen Sie bitte der ersten Seite dieser Informationsschrift.

#### **5. Wie werden die Reaktionen auf körperliche Ebene gemessen und warum? - Messungen der Blickbewegungen und des Pulses sowie Entnahme von Biomaterialien Blut- und Speichelproben -**

Der Nachweis biologischer Marker ist wichtig, da hierdurch deutlich wird, in welchem Maße Ihr Körper während einer positiven Interaktion mit Ihrer Partnerin unter Stress steht. Diese normale, körperliche Reaktion kann vom persönlichen

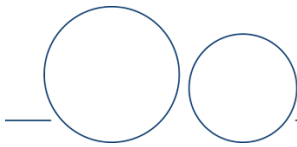

Belastungsempfinden deutlich abweichen. Die akute Aktivierung der biologischen Stresssysteme ist eine normale Reaktion und birgt keinerlei Gefahren für Ihre Gesundheit.

Sie und Ihre Partnerin liefern uns durch Ihre Mitarbeit dabei wichtige Daten, um ein eventuell verändertes Verhalten zwischen Ihnen beiden im Vergleich zu weniger psychisch belasteten Paaren zu erkennen. Des Weiteren werden die Werte Ihrer Biomarker vor und nach 10 Wochen bzw. nach dem CBC-Training verglichen, womit das Potential des Trainings zur objektiven Verbesserung partnerschaftlicher Interaktion und ihrer individuellen psychischen Belastung gemessen wird.

Mögliche pathologische Zufallsbefunde, also Ergebnisse der Untersuchungen die für Sie gesundheitlich von erheblicher Bedeutung sind und/oder einer weiteren Untersuchung bedürfen, teilt Ihnen die Studienleitung direkt nach der Auswertung mit, sofern Sie dies im Vorfeld wünschen. Unter dem Punkt „**Zufallsbefund**“ finden Sie für jede Untersuchung beschrieben, inwieweit dies möglich ist.

#### **24- Stunden Ein-Kanal-EKG**

Am Labortag 1 (siehe Seite 2) erhalten Sie von uns im Institut für Medizinische Psychologie einen Brustgurt, wie er auch im Sportbereich eingesetzt wird, den Sie direkt anlegen und für ca. 24 Stunden tragen. Die unkomplizierte Handhabung wird Ihnen vor Ort erklärt. Dieser Gurt schränkt den Alltag kaum ein, den Sie so fortführen sollten wie immer. Die Auswertung erfolgt nach der Gurtrückgabe im Institut für Medizinische Psychologie.

**Warum?** Die Langzeitmessung der Herzfrequenz („Puls“) über 24 Stunden gibt uns Auskunft über Erholung und Entspannung. So können wir die Balance zwischen Belastung und Ruhe der biologischen Systeme Ihres Körpers untersuchen.

**Mögliche Zufallsbefunde** können hierbei nur in geringem Ausmaß festgestellt werden, da wir keine Auswertung des EKGs, sondern allein die Abstände der Herzschläge, also die Herzfrequenz (Schläge des Herzens pro Minute) auswerten. D.h. einzig eine im Durchschnitt dauerhaft erhöhte Herzfrequenz, würden wir Ihnen mitteilen, sofern Sie dies wünschen.

#### **Speichelproben**

Am Labortag 2 werden wir Sie bitten, 20 Min. vor, direkt vor, direkt nach, und 20-30 Min. nach der positiven sozialen Interaktion eine geringe Menge Speichel abzugeben (pro Entnahme ca. 1 ml, insgesamt 4 mal). Für diese Speichelproben stellen wir Ihnen nummerierte und sortierte, einfach zu handhabende Speichelröhrchen zur Verfügung und erklären die Benutzung vor Ort.

**Warum?** Psychische Belastung führt zu einer gesteigerten Aktivierung der beiden Hauptstresssysteme im Körper, dem sympathischen Nervensystem (SNS) und der Hypothalamus-Hypophysen-Nebennierenrindendachse (HHNA). Aus 4 Speichelproben pro Proband erheben wir den Verlauf der Parameter dieser Stresssysteme: **Cortisol** (HHNA), **Alpha Amylase** (indirekt SNS) und **Immunparameter Interleukin IL-1 $\beta$**  und **IL-6** (indirekt mit Stress verbunden).

**Mögliche Zufallsbefunde:**



Interleukine (IL1- $\beta$  und IL6 aus Speichel): Keine bekannt.

Alpha-Amylase: Keine bekannt.

Speichel-Cortisol: Dauerhaft erhöhtes Cortisol im Speichel kann auf ein Cushing-Syndrom bzw. Morbus Cushing hindeuten.

### Blutproben

An Labortag 1 werden wir Ihnen mit Ihrer Erlaubnis insgesamt ca. 25 ml Blut abnehmen (das entspricht etwas mehr als 2 Esslöffeln). Für die Blutentnahme ist es nicht erforderlich, dass Sie nüchtern sind. **Warum?** Bei Stressreaktionen wird im Gehirn Serotonin freigesetzt. Dies kann jedoch nicht direkt gemessen werden. Wir erfassen die Einflüsse des Stresses auf das Gehirn deshalb indirekt über die Aktivierung des **Serotonin-Transporter-Gens (SLC6A4)**, welches im Blut nachgewiesen werden kann. Zusätzlich untersuchen wir die **genetische Aktivierung des Oxytocinrezeptors (OXTR)**, der mit Stresserleben und Bindungsverhalten in Zusammenhang steht. Beides wird über sogenannte „epigenetische“ Untersuchungen bestimmt. Hierbei wird explizit **nicht** ihr Genom entschlüsselt, sondern gemessen, in wie weit die zwei oben genannten Bereiche des Erbguts von den Körperzellen *abgelesen* werden. Folglich können auch keine Erbkrankheiten o.ä. aufgedeckt werden.

Ebenfalls werden **CRP** (C-reaktives Protein; indirekt mit Stress verbunden) und nochmals Interleukin **IL1-  $\beta$  und IL-6** im Blut gemessen. Dies ist das etablierte Verfahren zur Bestimmung der Parameter bei Stress. Mit Hilfe der zusätzlichen, oben beschriebenen Bestimmung der Interleukine im Speichel möchten wir prüfen, ob sich die Blut- und Speichelwerte im Verlauf ähnlich verhalten (steigen und fallen gemeinsam), so dass direkte Schlüsse von Speichel-Interleukine auf Blut-Interleukine gezogen werden können. Falls dies der Fall wäre, könnte bei zukünftigen Untersuchungen (z.B. wissenschaftlichen Studien zum Thema Depression) bei mehrfach nachgewiesenem Zusammenhang auf eine Blutentnahme verzichtet werden. Eine Speichelentnahme würde dann ausreichen.

### Mögliche Zufallsbefunde:

Entzündungsmarker IL-1 $\beta$ , IL-6, CRP: Erhöhte Werte deuten auf eine mögliche akute oder chronische Entzündung hin. Bei Diabetes Mellitus sind auch ohne zusätzlichen psychischen Stress CRP, IL1-  $\beta$  und IL-6 erhöht. Aus diesem Grund wird zum Ausschluss eines unbekanntes Diabetes Mellitus **HbA1c**, ein Langzeitmarker des Blutzuckers, bestimmt.

HbA1c: Leicht erhöhte Werte deuten auf einen Prä-Diabetes, erhöhte Werte deuten auf einen Diabetes Mellitus Typ II hin.

Epigenetische Marker (SLC6A4; OXTR): Keine bekannt.

Hinweis: Es wird kein umfassendes Blutbild erstellt. Das heißt, diese zu Forschungszwecken durchgeführte Untersuchung ersetzt nicht eine Blutentnahme bei einem Arzt.

Speicheluntersuchung und Herzfrequenzprofilauswertung sowie die Bestimmung des Interleukin 1 $\beta$  im Blut erfolgen im Institut für Medizinische Psychologie. CRP,



HbA1c und Interleukin 6 werden im Zentrallabor des Klinikums bestimmt. Am ZI Mannheim wird die epigenetische Auswertung von SLC6A4 und OXTR-Gen durchgeführt.

### **Eye Tracking und Videoaufzeichnung**

Beides findet am Labortag 2 während der zehnminütigen positiven sozialen Interaktion statt. Für diese Aufnahmen stehen entsprechende Geräte zur Erfassung der Blickbewegung, so genannte Eye-Tracker, auf einem Tisch zwischen Ihnen und Ihrer Partnerin. Außerdem zeichnen zwei Kameras den Kopf und Oberkörper des jeweiligen Gegenübers auf (sogenannte Szenenkameras), ohne die das Eye-Tracking nicht funktionieren würde. Es kommen **keine** Geräte zum Einsatz, die am Kopf o.ä. getragen werden. Sollten Sie eine Brille oder Kontaktlinsen tragen, bitten wir Sie, diese zur Untersuchung mitzubringen. Sollten Sie beides besitzen, bringen Sie bitte Ihre Kontaktlinsen mit, da diese beim Eye-Tracking leichter auswertbare Ergebnisse liefern.

**Warum?** Der Eye-Tracker ist ein Gerät, das aufzeichnet wohin Sie blicken. In mehreren Studien wurde bereits gezeigt, dass depressiv erkrankte Menschen im Vergleich zu nicht depressiv erkrankten Menschen ein verändertes Blickverhalten aufweisen. Bis jetzt wurde dies jedoch noch nie in einer echten Gesprächssituation zweier Partner systematisch untersucht.

Wir erhoffen uns hieraus neue Erkenntnisse zu erlangen zum Beispiel zur Veränderung der Aufmerksamkeitslenkung. Die Aufnahmen der Szenenkameras erlauben außerdem eine Untersuchung der Kommunikationsmuster. Unser Ziel ist es, Unterschiede im Blickverhalten aufdecken zu können.

**Zufallsbefunde:** Keine bekannt.

## **6. Was ist das CBC-Training?**

Wenn Sie am CBC-Training teilnehmen, werden Sie Methoden erlernen, die sich auf ein positives Miteinander in der Partnerschaft beziehen. Als nicht-religiöse (säkulare) Methode bietet das Training verschiedene Wege an, Mitgefühl gegenüber einem umfassenden Kreis an Menschen zu kultivieren und auszudehnen. Im Vordergrund stehen hier jedoch der Partner und die partnerschaftliche Beziehung.

Die darin beinhalteten Praktiken unterstützen die Entwicklung einer Vielzahl von positiven Qualitäten, Erfahrungen und Verhaltensweisen, wie z.B. Freundlichkeit, Dankbarkeit, als auch Empathie und Mitgefühl. Die fundamentale Grundannahme ist, dass Mitgefühl als eine Persönlichkeitseigenschaft entwickelt und erweitert werden kann. Diese Annahme wird durch aktuelle Forschungsergebnisse unterstützt.

Dieses CBC-Training kombiniert gedankliche Komponenten und Übungen (u.a. Istzustandsanalyse, Achtsamkeits- und Mitgefühlsmeditationen) und solche, die die Partnerschaft und das soziale Miteinander betreffen (z.B. Empathietraining). In standardisierten Labortests wurde bereits gezeigt, dass ein solches Training die psychische und körperliche Stress- und Immunantwort bei gesunden Individuen verbessert. Ob sich das Training auch bei Menschen mit Depressionen und auf die



Belastungen von Seiten des Partners entsprechend positiv auswirkt, und ob es einen positiven Einfluss auf die partnerschaftliche Interaktion hat, ist bisher noch nicht erforscht.

Die Teilnahme an einem CBC-Training über 10 Wochen würde nach aktuellem Stand etwa 300€ pro Person kosten. Für Sie und Ihre Partnerin ist bei entsprechender Zufallslosung dieses Training jedoch komplett **kostenfrei**.

## 7. Datenschutz und Aufbewahrung

Die von Ihnen zur Verfügung gestellten Daten und Biomaterialien werden ausschließlich für die wissenschaftliche Forschung verwendet und streng vertraulich behandelt. Ihnen wird bei der ersten Registrierung als Studienteilnehmer eine pseudonymisierte, verschlüsselte Identifikationsnummer (ID-Nummer, aufsteigend) zugeordnet. Dies ist ein Code, der auf Ihren ausgefüllten Fragebögen, Speichelproben etc. steht und keinerlei Informationen über Sie als Person beinhaltet. Alle Materialien, die gesammelt werden, werden mit dieser Nummer versehen. Nur die in Papierform vorliegende Einwilligungserklärung wird sowohl den Namen, als auch diese ID-Nummer enthalten und separat von allen Daten 2-fach verschlossen aufbewahrt werden. Es werden keine Daten mit dem Namen, sondern nur mit Ihrer ID-Nummer analysiert und es gibt außer über die Einwilligungserklärung keinen Weg, den Namen mit der ID-Nummer zu verbinden. Alle psychologischen und körperlichen Daten werden ausschließlich über ID-Nummern kenntlich gemacht. Keine Publikation dieses Projekts wird Ihren Namen preisgeben. Darüber hinaus werden die Ergebnisse sämtlicher Datenanalysen getrennt von Ihren personenbezogenen Daten gespeichert und können nicht ohne Mitwirkung der Projekt- oder Studienleitung Ihrer Person zugeordnet werden.

Diese Studie wird überwiegend aus öffentlichen Mitteln (z.B. der Deutschen Forschungsgemeinschaft DFG) finanziert. In Zukunft ergeben sich möglicherweise neue wissenschaftliche Fragestellungen, die im Rahmen des oben genannten Forschungsbereiches mithilfe der bereits erhobenen Daten oder Biomaterialien beantwortet werden können. Eine Veröffentlichung der Daten kann folglich bei der Beantwortung dieser neuen Fragestellungen helfen, wodurch vergleichbare Daten nicht nochmals erhoben werden müssten und öffentliche Mittel dadurch effizienter genutzt werden könnten.

Die erhobenen Daten werden dazu nach Beendigung der Studie der nationalen und internationalen Wissenschaft in anonymisierter Form durch eine Veröffentlichung über das Forschungsdatenrepositorium der Universität Heidelberg „heiDATA“ zugänglich gemacht. Dies dient zusätzlich der wissenschaftlichen Qualitätssicherung im Sinne der Nachvollziehbarkeit der erbrachten Studienergebnisse. Eine Aufbewahrung der Daten bei heiDATA erfolgt **ohne** persönliche Identifikatoren (z.B. Name oder Kontaktdaten).



Die auf diese Weise veröffentlichten Daten sowie auch Veröffentlichungen in wissenschaftlichen Fachartikeln, welche die Daten in anonymisierter Form verwenden, bleiben dauerhaft öffentlich verfügbar.

Die Daten, Biomaterialien und ausgefüllten Fragebögen werden Eigentum des Instituts für Medizinische Psychologie des Universitätsklinikums Heidelberg. Die Speichel- und Blutproben werden dort aufbewahrt, oder mit Ihrer ID-Nummer verschlüsselt auch an andere Labore verschickt, welche mit diesen Proben Analysen durchführen. Ein Teil der Blutproben wird vom Zentralinstitut für Seelische Gesundheit (Abteilung Genetische Epidemiologie in der Psychiatrie des Zentralinstituts für Seelische Gesundheit) in Mannheim aufbewahrt, das Ihre Blutproben mit einer anderen, separat erzeugten ID-Nummer verschlüsselt zur Analyse des genetischen Materials erhält. Alle in dieser Studie erhobenen Biomaterialien werden befristet auf maximal 10 Jahre nach Beendigung der Studie aufbewahrt. Falls in Zukunft eine wesentlich veränderte wissenschaftliche Fragestellung mithilfe Ihrer Probe untersucht werden soll, wird zuvor eine Stellungnahme der zuständigen Ethikkommission eingeholt.

## **8. Risiken und Nutzen der Teilnahme**

### **Risiken:**

Mit dem Erheben der Fragebogendaten, der Videoaufnahmen, der Aufnahmen der Blickbewegungen, der Langzeitmessungen des Pulses und der Entnahme der Speichelproben sind keinerlei Risiken verbunden.

Mit den Blutentnahmen bestehen die Risiken, die mit einer normalen Blutentnahme verbunden sind. Die Entnahme einer Blutprobe ist in der Regel nur mit einem sehr geringen Risiko verbunden. An der Einstichstelle kann es zu leichten Schmerzen kommen oder es kann ein Bluterguss (blauer Fleck) entstehen, der evtl. einige Tage sichtbar ist. In äußerst seltenen Fällen kann auch die Bildung eines Blutgerinnsels (Thrombose), eine örtlich begrenzte Entzündung oder eine Infektion an der Einstichstelle auftreten oder es kann zu dauerhaften Schädigungen von Blutgefäßen oder Nerven kommen. Die Blutentnahmen werden von einem dazu befähigten und qualifizierten Fachpersonal (i.d.R. Arzt) durchgeführt.

Die Zuordnung zu Behandlungs- bzw. Kontrollgruppe erfolgt über ein Zufallsverfahren (sog. Randomisierung), worauf wir keinen Einfluss haben. Diejenigen die der Kontrollgruppe zugeordnet werden, erhalten von unserer Seite zunächst keine Intervention. Die übliche Wartezeit auf einen individuellen Psychotherapieplatz für die an Depression Erkrankten, kann durch eine reguläre allgemeinärztliche bzw. pharmakologische antidepressive Behandlung aufgenommen bzw. weitergeführt werden.

Für diejenigen Paare, die an dem CBC-Training teilnehmen, sind keine besonderen Risiken zu erwarten. Bisher sind keine unerwünschten Wirkungen in Verbindung





mit dem CBC-Training wissenschaftlich erfasst worden. Es sind keine körperlichen oder psychischen Gefahren zu erwarten. Durch die potenziell emotionalen Erfahrungen während der Trainingssitzungen kann es zu psychischen Reaktionen kommen, z.B. Stimmungsschwankungen. Diese Reaktionen werden in den Sitzungen jedoch berücksichtigt und als wichtige Erlebnisse in das Geschehen des Gruppentrainings einbezogen. Alle Gruppentrainings werden von Psychologen bzw. Psychotherapeuten und zusätzlich in CBCT qualifizierten Trainern, durchgeführt, sowie begleitend von erfahrenen Psychotherapeuten supervidiert.

**Nutzen:**

Das hier durchgeführte Forschungsvorhaben zielt auf eine Verbesserung unseres Verständnisses für die Entstehung depressiver Störungen sowie deren Therapie durch psychologische Interventionen ab. Hierbei interessiert uns explizit der Einfluss der Partnerschaft und inwiefern die Belastung des Partners hierbei eine Rolle spielt.

Für diejenigen, die an einem für Sie kostenlosen CBC-Training teilnehmen werden, liegt der persönliche Nutzen darin, dass Sie Veränderungsimpulse im Umgang mit psychischen Belastungen und vor allem des partnerschaftlichen Umgangs miteinander erhalten können. Beispielsweise könnten Sie im Verlauf des Trainings erleben, wie Sie mit einem positiveren Blick oder Gefühl Ihrer Partnerin begegnen können. Sie können Impulse für neue Verhaltensweisen erhalten und erfahren, wie es sich anfühlt, wenn Sie eine alternative Haltung zu Ihren Problemen einnehmen.

Nach Ende der Studie werden Ihnen die Gesamtergebnisse der Studie mitgeteilt. Für Ihre vollständige Teilnahme an der Studie erhält **jedes Paar** insgesamt eine Aufwandsentschädigung in Höhe von **200€, also 50€ pro Person pro Messzeitpunkt**, unbar auf ein anzugebendes Konto.

Nach vollständiger Studienteilnahme haben Sie die Möglichkeit als Dankeschön an dem gruppenbasierten Mitgefühlstraining für Paare (CBC-Training) teilzunehmen. Die Kosten hierfür werden vom Institut übernommen (circa 300€ pro Person).

## 9. Freiwilligkeit der Teilnahme

Die Erhebung, Verarbeitung und Nutzung der Daten im Rahmen des Projektes erfolgt auf Basis der Rechtsgrundlage der freiwilligen und informierten Einwilligung der Teilnehmer (gemäß §§ 4, 4a BDSG). Sie nehmen an dieser Studie freiwillig teil. Sie können Ihre Teilnahme jederzeit auch ohne Angabe von Gründen abbrechen; dies hat keinerlei negative Konsequenzen für Ihre Kursteilnahme oder Ihre Gesundheitsversorgung. Die Zuteilung zur Trainings- oder Kontrollgruppe erfolgt über eine Zufallsauswahl, so dass wir an dieser Stelle keine persönlichen Präferenzen berücksichtigen können.

Die Untersuchungen werden nur dann durchgeführt, wenn Sie dazu freiwillig und schriftlich Ihre Einwilligung erklären.

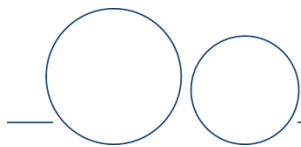

## 10. Widerrufsrecht

Sie können Ihre Einwilligung zur Verwendung Ihrer Daten und Biomaterialien jederzeit ohne Angabe von Gründen und ohne nachteilige Folgen für Sie widerrufen. Im Falle eines Widerrufs können Sie entscheiden, ob Ihre Biomaterialien vernichtet und die dazu gehörenden Daten gelöscht werden sollen oder ob Sie in anonymisierter Form für weitere Forschungsvorhaben verwendet werden dürfen. Dies gilt auch dann, wenn die verschlüsselten Daten und Blutproben zur wissenschaftlichen Analyse verschlüsselt an das ZI Mannheim weitergegeben wurden. Bereits erhobene Daten verbleiben auch nach Vernichtung des Biomaterials bzw. des Fragebogens in der Studie, soweit der Personenbezug nicht mehr besteht.

### **Wenden Sie sich für einen Widerruf bitte an die zuständige Studienleitung:**

Prof. Dr. phil. Dipl.- Psych. Beate Ditzen  
Institut für Medizinische Psychologie im  
Zentrum für Psychosoziale Medizin (ZPM)  
Universitätsklinikum Heidelberg  
Bergheimer Str. 20, D-69115 Heidelberg  
Tel.: +49 6221 56 8150  
E-Mail: beate.ditzen@med.uni-heidelberg.de

## 11. Erneute Kontaktaufnahme

Es besteht die Möglichkeit der Kontaktaufnahme durch die Studienleitung, wenn die Ihnen entnommenen Biomaterialien wider Erwarten Informationen enthalten, die für die Erhaltung oder Wiederherstellung Ihrer Gesundheit von erheblicher Bedeutung sind. Die Kontaktaufnahme wird durch die Studienleitung oder durch eine durch die Studienleitung beauftragte Person telefonisch, schriftlich oder per E-Mail erfolgen.

## 12. Versicherungsschutz

Für die Planung und Durchführung der Studie besteht ein Versicherungsschutz für Probanden im Rahmen der Betriebs-Haftpflichtversicherung des Universitätsklinikums Heidelberg. Der Versicherungsschutz erstreckt sich auf die gesetzliche Haftpflicht des Universitätsklinikums sowie auf die persönliche gesetzliche Haftpflicht aller im dienstlichen Auftrag für das Universitätsklinikum an der Studie mitwirkenden Mitarbeiter (Studienleiter, sonstiges Personal), beispielsweise für Schäden durch die Entnahme von Blutproben (Betriebs-/Umwelt-Haftpflicht-, Umweltschadens-Versicherung: Nr. 39327978 01116. Versicherer: HDI-Gerling Industrie Versicherung AG, HDI-Platz 1, 30659 Hannover, Telefon: +49 511 645-0, Telefax: +49 511 645-4545, E-Mail: info@hdi-gerling.de).

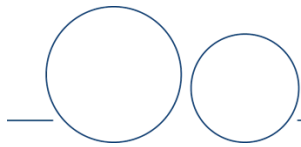

### 13. Weitere Informationen

Sollten Sie noch weitere Fragen haben, wenden Sie sich bitte an Ihre Studienleitung (die entsprechenden Kontaktinformationen finden Sie auf Seite 1 dieser Informationsschrift). Stellen Sie alle Fragen, die Ihnen wichtig erscheinen und lassen Sie sich ausreichend Zeit für Ihre Entscheidung zur Teilnahme an dieser wissenschaftlichen Untersuchung.

Mit freundlichen Grüßen

Dr. Corina Aguilar-Raab und Dr. Marc Jarczok  
(Projektleitung)
